# Supplementary material for: Effects of Co-application of Cadmium-Immobilizing Bacteria and Organic Fertilizers on Houttuynia cordata and Microbial Communities in a Cadmium-Contaminated Field
Source: Front Microbiol. 2022 May 6;12:809834. doi: 10.3389/fmicb.2021.809834 (PMC9122265; doi:10.3389/fmicb.2021.809834)
Supplement: Supplementary Table 1 — Amplicon sequence variants (ASVs) of 16S rRNA gene for the cadmium-contaminated Houttuynia cordata field soil in different biofertilizer treatments. [file Table_1.XLSX]

## Sheet: Sheet1
# Constructed from biom file
#OTU ID	CK1	CK2	CK3	CK4	CK5	CK6	MB1	MB2	MB3	MB4	MB5	MB6	FEMB1	FEMB2	FEMB3	FEMB4	FEMB5	FEMB6	FE1	FE2	FE3	FE4	FE5	FE6	FCMB1	FCMB2	FCMB3	FCMB4	FCMB5	FCMB6	FC1	FC2	FC3	FC4	FC5	FC6	taxonomy
6e4e896245dec3b4109d2042ca511168	0	0	0	0	0	1	4	0	0	0	0	1	2	0	0	0	0	0	3	0	0	0	0	0	1	0	1	0	0	0	0	0	2	0	0	0	D_0__Bacteria;D_1__Proteobacteria;D_2__Gammaproteobacteria;D_3__Xanthomonadales;D_4__Xanthomonadaceae
6358bacf71297d7bdc42d6025ad961cb	0	2	2	2	2	2	9	1	2	2	3	0	1	0	2	1	0	2	2	0	0	0	0	0	0	1	1	0	0	0	1	1	0	0	1	5	D_0__Bacteria;D_1__Bacteroidetes;D_2__Bacteroidia;D_3__Chitinophagales;D_4__Chitinophagaceae;D_5__Parafilimonas
5b57556329375b336f792b97f67a860d	3	7	3	3	2	5	6	1	2	8	2	2	4	3	0	2	2	5	4	2	1	5	5	1	3	5	6	9	4	8	6	6	3	5	1	11	D_0__Bacteria;D_1__Proteobacteria;D_2__Gammaproteobacteria;D_3__Betaproteobacteriales;D_4__A21b
6ed681b9f763ff8009eec973fc07f4b6	1	3	10	3	3	8	0	1	0	0	5	1	0	0	1	0	6	2	2	0	8	5	0	5	1	6	2	0	1	2	0	4	4	0	2	2	D_0__Bacteria;D_1__Proteobacteria;D_2__Gammaproteobacteria;D_3__Xanthomonadales
042dd7ceb96ed0a1d0716a72ec24d464	0	0	0	0	0	0	1	0	0	0	0	0	0	0	3	5	4	0	0	2	0	0	0	0	0	0	0	0	0	1	0	0	0	0	0	0	D_0__Bacteria;D_1__Acidobacteria;D_2__Acidobacteriia;D_3__Solibacterales;D_4__Solibacteraceae (Subgroup 3);D_5__Candidatus Solibacter
0d3c6f2aa2507b8fab3e799564a89039	0	0	0	0	0	0	0	2	1	0	3	0	2	1	1	0	0	0	0	0	0	0	0	0	0	0	0	0	0	0	0	0	0	0	0	3	D_0__Bacteria;D_1__Chloroflexi;D_2__OLB14
335117716225b177b6c1d83aaff2abcb	0	0	0	5	0	0	1	0	0	0	0	0	0	0	0	0	0	0	0	0	0	0	0	0	0	0	0	0	0	0	0	0	0	0	0	0	D_0__Bacteria;D_1__Gemmatimonadetes;D_2__Gemmatimonadetes;D_3__Gemmatimonadales;D_4__Gemmatimonadaceae;D_5__uncultured;D_6__uncultured Pseudomonadales bacterium
90dca8dc920835f80de34197fa417eae	0	0	0	0	0	0	0	0	0	0	0	0	0	1	0	0	4	3	0	0	4	0	0	1	2	0	0	0	0	0	0	0	0	0	0	0	D_0__Bacteria;D_1__Proteobacteria;D_2__Gammaproteobacteria;D_3__Betaproteobacteriales;D_4__Burkholderiaceae
a744645fbefa7da755ec6547960b4013	1	0	2	0	0	0	0	0	0	0	0	0	0	0	0	0	0	0	0	0	0	1	0	2	0	0	0	0	0	0	0	0	0	0	1	0	D_0__Bacteria;D_1__Proteobacteria;D_2__Gammaproteobacteria;D_3__Xanthomonadales;D_4__Xanthomonadaceae;D_5__Luteimonas
9493135e5696a7263e20f649b03c535d	0	0	0	0	0	0	0	0	0	0	0	0	0	0	0	0	0	0	0	0	0	1	0	0	0	0	0	0	0	0	0	0	0	0	0	1	D_0__Bacteria;D_1__Proteobacteria;D_2__Gammaproteobacteria;D_3__Betaproteobacteriales
55211e01799a80bdfbd4eb2863d8f4f2	0	2	0	0	1	0	0	0	0	0	1	0	0	0	0	0	0	0	0	2	0	0	0	0	0	0	0	0	0	0	0	1	1	3	0	0	D_0__Bacteria;D_1__Actinobacteria;D_2__MB-A2-108;D_3__uncultured bacterium #0425-2M17;D_4__uncultured bacterium #0425-2M17;D_5__uncultured bacterium #0425-2M17;D_6__uncultured bacterium #0425-2M17
a7668fb978d06e63d22e0caf7aa7c550	5	2	6	7	2	2	0	0	0	2	2	2	0	0	0	0	0	0	0	0	0	0	0	0	0	0	0	0	0	0	4	2	5	2	6	2	D_0__Bacteria;D_1__Proteobacteria;D_2__Gammaproteobacteria;D_3__Betaproteobacteriales;D_4__SC-I-84
a9f398f433939e6c5fe1974291c5ebef	2	0	2	1	1	1	0	0	0	1	0	1	3	0	1	0	1	0	0	0	0	0	0	2	0	1	1	0	0	1	0	2	5	0	1	0	D_0__Bacteria;D_1__Proteobacteria;D_2__Alphaproteobacteria;D_3__Rhizobiales;D_4__Beijerinckiaceae
228b3f80c6a7ccbb666d39343a4c9e59	1	1	1	0	1	0	1	0	1	0	1	2	1	0	0	0	0	0	0	0	0	0	0	0	1	0	0	0	0	0	0	0	0	1	1	0	D_0__Bacteria;D_1__Actinobacteria;D_2__Acidimicrobiia;D_3__IMCC26256
b6d0a9a279b187976c6480d88d87d21e	0	0	0	0	0	0	0	0	0	0	0	1	0	0	0	0	0	0	0	0	1	0	0	0	0	0	0	2	2	0	0	0	0	0	0	0	D_0__Bacteria;D_1__Actinobacteria;D_2__Actinobacteria;D_3__Frankiales;D_4__Geodermatophilaceae;D_5__Blastococcus
1151c58f810a397b0c071811eecccb82	4	0	0	0	0	0	1	3	0	0	3	0	0	0	2	0	2	1	0	0	0	0	0	0	2	0	0	0	3	0	0	1	0	0	0	2	D_0__Bacteria;D_1__Patescibacteria;D_2__Saccharimonadia;D_3__Saccharimonadales;D_4__Saccharimonadaceae;D_5__candidate division TM7 genomosp. GTL1;D_6__candidate division TM7 genomosp. GTL1
0d4a55182bb0f251255c6ec65be99df3	0	1	1	0	0	0	0	0	4	3	1	0	0	0	0	0	0	1	3	0	1	1	0	0	0	0	0	0	0	0	0	0	1	0	4	0	D_0__Bacteria;D_1__Acidobacteria;D_2__Subgroup 6;D_3__Acidobacteria bacterium SCN 69-37;D_4__Acidobacteria bacterium SCN 69-37;D_5__Acidobacteria bacterium SCN 69-37;D_6__Acidobacteria bacterium SCN 69-37
e44080ce9754a271e725bf9ad2ddf81c	1	0	0	1	0	0	0	0	0	0	0	0	0	0	0	0	0	0	0	0	0	0	0	0	0	0	0	0	0	0	0	3	0	0	0	0	D_0__Bacteria;D_1__Acidobacteria;D_2__Acidobacteriia;D_3__Solibacterales;D_4__Solibacteraceae (Subgroup 3);D_5__Paludibaculum
d6457a966f73c8e4c1c7045cf7735454	1	0	0	0	0	0	0	0	0	0	0	0	0	0	0	0	0	0	0	0	0	0	0	0	0	0	0	0	0	0	0	0	2	0	0	0	D_0__Bacteria;D_1__Actinobacteria;D_2__Thermoleophilia;D_3__Gaiellales;D_4__uncultured;D_5__bacterium Ellin7530;D_6__bacterium Ellin7530
19221ff9d794254d79f7143e8cd89c20	0	0	0	0	0	0	0	0	0	0	0	0	2	0	0	0	0	0	0	0	2	0	0	0	3	0	0	0	2	0	1	0	0	1	0	2	D_0__Bacteria;D_1__Proteobacteria;D_2__Deltaproteobacteria;D_3__NB1-j;D_4__uncultured Desulfoglaeba sp.;D_5__uncultured Desulfoglaeba sp.;D_6__uncultured Desulfoglaeba sp.
24b406f1d91e767325be6cb722b539f8	0	0	0	0	0	0	0	0	0	0	0	0	0	0	0	0	0	0	4	0	0	0	0	3	0	0	0	0	0	0	0	0	0	0	0	0	D_0__Bacteria;D_1__Acidobacteria;D_2__Acidobacteriia;D_3__Solibacterales;D_4__Solibacteraceae (Subgroup 3);D_5__Bryobacter;D_6__uncultured Acidobacteriales bacterium
263cab75ee5246d3b4c832d45ea63d22	0	0	0	0	0	0	0	0	0	0	0	0	0	6	0	5	2	1	0	0	1	0	1	0	2	0	0	0	1	0	0	0	0	0	0	0	D_0__Bacteria;D_1__Proteobacteria;D_2__Deltaproteobacteria;D_3__Myxococcales;D_4__Haliangiaceae;D_5__Haliangium;D_6__myxobacterium AT3-03
6057b6439413650be635262428a3a545	1	3	0	1	0	3	2	1	0	0	0	0	0	0	0	1	1	0	0	2	2	0	0	1	0	2	1	0	1	0	2	2	1	0	1	2	D_0__Bacteria;D_1__Proteobacteria;D_2__Alphaproteobacteria;D_3__Reyranellales;D_4__Reyranellaceae;D_5__Reyranella
9ecc2e0c8b03a57acac5988c0563ba15	0	0	0	0	0	0	0	0	0	0	2	0	0	0	0	0	0	0	0	0	0	0	0	0	0	0	0	0	0	0	0	1	0	0	0	0	D_0__Bacteria;D_1__Bacteroidetes;D_2__Bacteroidia;D_3__Flavobacteriales;D_4__Flavobacteriaceae;D_5__Flavobacterium
425c8ddcf8b203d20f30238937d85018	0	0	0	0	0	0	0	0	0	0	0	0	0	0	0	0	0	0	0	0	2	0	0	2	1	0	6	0	0	0	0	0	0	0	0	0	D_0__Bacteria;D_1__Bacteroidetes;D_2__Bacteroidia;D_3__Chitinophagales;D_4__Chitinophagaceae
8e8dc960d051fcea9a246aef5a1b3085	0	0	0	0	0	0	0	0	0	0	0	0	1	0	0	1	0	0	0	0	1	0	5	0	0	0	1	2	0	0	0	0	0	0	0	0	D_0__Bacteria;D_1__Proteobacteria;D_2__Deltaproteobacteria;D_3__Myxococcales;D_4__uncultured;D_5__uncultured Cystobacterineae bacterium;D_6__uncultured Cystobacterineae bacterium
0e0b47fd31753a99140a94b1d12a3f68	0	0	0	0	0	0	0	0	0	0	0	0	0	1	4	0	0	0	0	0	0	0	0	0	0	0	0	0	0	0	0	0	0	0	0	0	D_0__Bacteria;D_1__Bacteroidetes;D_2__Bacteroidia;D_3__Chitinophagales;D_4__Saprospiraceae;D_5__uncultured;D_6__uncultured Haliscomenobacter sp.
d57838650dafcb708999c61d7d33e954	0	4	0	0	0	0	0	0	0	0	0	0	2	0	0	0	0	0	0	0	0	2	0	0	0	0	0	2	0	0	0	0	0	0	0	0	D_0__Bacteria;D_1__Proteobacteria;D_2__Deltaproteobacteria;D_3__Desulfarculales;D_4__Desulfarculaceae;D_5__uncultured
2e5a9cdd8d194865654d726dca80f067	3	2	0	1	2	1	0	3	0	0	2	3	0	3	3	0	3	0	1	0	2	0	0	0	2	0	3	0	2	0	2	0	0	2	3	0	D_0__Bacteria;D_1__Bacteroidetes;D_2__Bacteroidia;D_3__Cytophagales;D_4__Microscillaceae;D_5__uncultured;D_6__Hassallia byssoidea VB512170
79a5ad68b0e65217ba270897f030641f	0	0	0	0	0	0	0	0	0	0	0	0	0	0	0	0	0	0	0	0	0	0	0	0	0	0	0	0	0	0	0	1	0	0	0	4	D_0__Bacteria;D_1__Proteobacteria;D_2__Deltaproteobacteria;D_3__MBNT15
0d00e383bfdf13166146d7fa38ad7908	0	0	1	2	0	0	0	1	0	0	0	0	0	0	0	0	0	0	0	0	2	1	0	0	0	0	0	0	0	0	1	1	0	4	0	0	D_0__Bacteria;D_1__Acidobacteria;D_2__Subgroup 6;D_3__Acidobacteria bacterium SCN 69-37;D_4__Acidobacteria bacterium SCN 69-37;D_5__Acidobacteria bacterium SCN 69-37;D_6__Acidobacteria bacterium SCN 69-37
913414521c3e8c639f0d9fcaa80b338c	0	0	0	0	0	0	0	0	0	0	0	0	0	2	0	0	2	0	0	0	0	0	0	0	1	0	1	2	0	2	0	0	0	0	0	0	D_0__Bacteria;D_1__Acidobacteria;D_2__Acidobacteriia;D_3__Solibacterales;D_4__Solibacteraceae (Subgroup 3);D_5__Bryobacter
ebba441a5996c688196ca00211d52d0c	0	2	0	0	0	0	0	0	0	0	0	0	0	0	0	0	0	0	0	0	0	0	0	0	0	0	6	0	0	0	0	0	1	0	0	0	D_0__Bacteria;D_1__Bacteroidetes;D_2__Bacteroidia;D_3__Chitinophagales;D_4__Saprospiraceae;D_5__Phaeodactylibacter;D_6__uncultured Haliscomenobacter sp.
9b877a0331e9b70f477c37dc794a8918	0	0	1	0	0	0	0	0	0	0	0	0	0	0	0	0	0	0	2	0	0	0	0	0	0	0	0	0	0	0	1	0	1	0	0	0	D_0__Bacteria;D_1__Latescibacteria
12d51d7b55b77afb71d8f3c2896f8cf3	0	0	0	0	0	0	0	0	0	0	0	0	0	0	0	0	0	0	0	0	0	0	0	0	1	6	0	0	0	2	0	1	0	0	2	0	D_0__Bacteria;D_1__Proteobacteria;D_2__Alphaproteobacteria;D_3__Rhizobiales;D_4__Rhizobiaceae
38e2bce373d41d89ac631f862becf2ce	0	0	0	0	0	0	0	0	0	0	0	0	0	0	0	0	0	0	0	0	0	0	0	1	0	0	0	0	0	0	0	0	0	0	0	0	D_0__Bacteria;D_1__Actinobacteria;D_2__Thermoleophilia;D_3__Gaiellales;D_4__uncultured
1ef2a11ab4bd580b135d35d54496bcb7	0	0	0	0	0	0	0	0	0	0	0	0	0	0	0	0	0	2	0	0	0	1	0	0	0	1	0	0	0	0	0	0	0	0	1	0	D_0__Bacteria;D_1__Proteobacteria;D_2__Gammaproteobacteria;D_3__Betaproteobacteriales;D_4__SC-I-84
9a86f4b779cf78b5a73562f75080b435	0	0	0	0	0	0	0	0	0	0	2	0	0	0	0	0	0	0	0	0	0	0	0	0	2	0	0	0	0	0	3	0	0	0	0	2	D_0__Bacteria;D_1__Proteobacteria;D_2__Gammaproteobacteria;D_3__Pseudomonadales;D_4__Moraxellaceae;D_5__Acinetobacter
41a146beeeeaa29260a4a2ff8b780d14	0	0	0	0	0	0	0	0	0	2	0	0	3	0	0	0	0	0	2	0	0	0	0	0	0	0	0	0	0	0	0	0	0	0	0	0	D_0__Bacteria;D_1__Proteobacteria;D_2__Gammaproteobacteria;D_3__Betaproteobacteriales;D_4__Nitrosomonadaceae;D_5__MND1
9acfbef97977a7d067232da9c1a28fc7	0	0	2	2	3	0	0	0	0	0	1	0	0	0	0	0	0	2	0	0	1	0	0	0	0	0	0	0	0	0	0	0	0	0	1	0	D_0__Bacteria;D_1__Bacteroidetes;D_2__Bacteroidia;D_3__Sphingobacteriales;D_4__AKYH767;D_5__uncultured bacterium PHOS-HE51;D_6__uncultured bacterium PHOS-HE51
200389127576f38bd1a088fe0fe0be99	7	1	7	6	5	1	3	3	1	1	3	1	0	0	0	0	0	2	0	0	2	0	0	0	0	0	0	0	1	0	7	6	2	8	7	0	D_0__Bacteria;D_1__Proteobacteria;D_2__Gammaproteobacteria;D_3__Betaproteobacteriales;D_4__Burkholderiaceae
896de7c6a40535e9e17f58011fcc6f89	0	0	0	1	3	0	0	0	0	0	0	0	0	0	0	0	3	0	0	0	0	2	0	0	0	0	0	0	1	0	0	0	0	0	0	0	D_0__Bacteria;D_1__Bacteroidetes;D_2__Bacteroidia;D_3__Chitinophagales;D_4__Chitinophagaceae
775d88d419b39e0b0b21eedeaa6afbdf	0	0	0	0	0	0	0	3	2	0	0	0	0	1	0	0	0	0	0	0	0	0	0	0	0	0	0	0	0	1	0	0	0	0	0	0	D_0__Bacteria;D_1__Acidobacteria;D_2__Blastocatellia (Subgroup 4);D_3__Blastocatellales;D_4__Blastocatellaceae
53c97f121bc7f60610e1fc4b1fd22f72	0	0	0	0	1	0	0	0	1	0	0	0	0	0	0	0	1	0	0	0	0	0	3	0	0	0	0	0	0	0	0	0	0	0	0	0	D_0__Bacteria;D_1__Proteobacteria;D_2__Gammaproteobacteria;D_3__Betaproteobacteriales;D_4__SC-I-84
8cc972ecc2425741ea66515560fc4574	3	1	1	0	5	3	5	9	2	7	4	4	1	5	10	8	4	2	2	3	2	4	5	1	7	0	2	2	3	0	2	1	3	1	1	2	D_0__Bacteria;D_1__Acidobacteria;D_2__Acidobacteriia;D_3__Solibacterales;D_4__Solibacteraceae (Subgroup 3);D_5__Bryobacter;D_6__uncultured actinobacterium
421a44e235d2a4d6f6a8097705d10343	5	9	13	9	6	10	8	14	10	18	17	17	2	5	1	2	5	12	5	5	4	7	3	8	6	7	5	5	3	5	9	11	11	12	9	8	D_0__Bacteria;D_1__Proteobacteria;D_2__Deltaproteobacteria;D_3__Myxococcales;D_4__Haliangiaceae;D_5__Haliangium
7b1e9b89537da492845d8ace523192d3	0	0	1	0	0	0	2	0	0	0	0	0	0	0	0	0	2	0	0	1	0	2	0	0	0	0	0	0	0	0	0	1	0	0	1	0	D_0__Bacteria;D_1__Acidobacteria;D_2__Blastocatellia (Subgroup 4);D_3__Pyrinomonadales;D_4__Pyrinomonadaceae;D_5__RB41;D_6__uncultured bacterium gp4
4c2d3dd43346ac4a9b31453799a0ad9c	0	0	4	3	0	4	0	0	0	0	0	0	0	2	1	0	0	2	0	1	4	0	0	0	0	1	0	0	0	1	2	3	3	1	0	0	D_0__Bacteria;D_1__Proteobacteria;D_2__Gammaproteobacteria;D_3__CCD24;D_4__uncultured Pseudoxanthomonas sp.;D_5__uncultured Pseudoxanthomonas sp.;D_6__uncultured Pseudoxanthomonas sp.
075d068a2285c12ee44344d9b3c19a92	0	0	0	1	1	3	0	0	0	1	0	2	2	3	0	2	5	1	7	2	1	3	5	5	3	6	5	4	4	0	0	3	3	0	1	2	D_0__Bacteria;D_1__Proteobacteria;D_2__Alphaproteobacteria;D_3__Reyranellales;D_4__Reyranellaceae;D_5__Reyranella;D_6__uncultured proteobacterium
661a16e39db33dcaf12f3b010861b023	0	0	2	0	0	0	1	0	0	0	0	1	0	0	0	0	0	0	0	0	0	0	0	2	0	0	0	0	0	0	0	0	0	0	0	0	D_0__Bacteria;D_1__Chloroflexi;D_2__Anaerolineae;D_3__SBR1031;D_4__A4b
952a5855d2e527f1ca66cd9b6612ec39	5	10	8	4	2	4	6	8	6	0	3	10	3	1	0	3	5	4	2	1	1	5	0	0	1	0	0	0	2	0	6	2	0	7	2	1	D_0__Bacteria;D_1__Proteobacteria;D_2__Gammaproteobacteria;D_3__Betaproteobacteriales;D_4__Nitrosomonadaceae;D_5__mle1-7;D_6__uncultured Rhodocyclaceae bacterium
54f2d82729445c46bf1a5c8181879553	1	0	0	0	0	2	0	0	0	0	0	0	0	0	0	0	0	0	0	0	0	0	0	0	0	0	0	0	0	0	0	0	0	0	0	0	D_0__Bacteria;D_1__Proteobacteria;D_2__Alphaproteobacteria;D_3__Rhizobiales;D_4__Xanthobacteraceae;D_5__Bradyrhizobium
30e75c31d78748f1432cea1a1753c1c4	0	3	0	1	0	0	3	0	0	0	2	0	0	0	0	0	0	0	0	0	0	0	0	0	0	0	0	0	0	0	0	0	0	0	0	0	D_0__Bacteria;D_1__Proteobacteria;D_2__Gammaproteobacteria;D_3__Xanthomonadales;D_4__Rhodanobacteraceae;D_5__Rudaea
139c18e065e8ea20f04732665ef1aba4	5	0	0	0	0	2	0	0	0	3	0	0	0	0	0	0	0	0	0	0	2	0	0	0	0	0	0	0	0	0	0	3	1	0	0	2	D_0__Bacteria;D_1__Bacteroidetes;D_2__Bacteroidia;D_3__Flavobacteriales;D_4__Flavobacteriaceae;D_5__Flavobacterium
da160a306c52dc63bc1e4b810ffbac92	0	0	0	0	1	0	0	0	0	0	0	0	0	0	0	0	0	0	0	2	0	0	0	0	0	0	3	2	0	0	0	0	0	0	0	0	D_0__Bacteria;D_1__Acidobacteria;D_2__Acidobacteriia;D_3__Subgroup 2;D_4__uncultured eubacterium WD264;D_5__uncultured eubacterium WD264;D_6__uncultured eubacterium WD264
6b2404e0f5f6725dc710f07660b0b9b6	0	0	4	0	2	0	0	0	0	0	1	0	0	0	0	0	0	0	0	0	2	0	0	0	0	2	1	0	0	0	0	0	0	0	1	0	D_0__Bacteria;D_1__Proteobacteria;D_2__Deltaproteobacteria;D_3__Myxococcales;D_4__Haliangiaceae;D_5__Haliangium;D_6__uncultured sludge bacterium A9
8c9299bb3ad79f57fb29b396eb8cbc6e	0	0	0	0	0	0	0	0	0	0	0	0	0	1	1	0	1	1	0	1	0	0	0	1	1	1	1	0	0	0	0	0	0	0	0	0	D_0__Bacteria;D_1__Acidobacteria;D_2__Acidobacteriia;D_3__Solibacterales;D_4__Solibacteraceae (Subgroup 3);D_5__Candidatus Solibacter
730da490fd509d1788905d93f6f46bec	2	0	2	0	0	0	0	0	0	0	0	0	9	5	3	1	1	2	6	18	4	1	6	6	2	1	1	15	1	5	0	0	0	0	0	0	D_0__Bacteria;D_1__Proteobacteria;D_2__Deltaproteobacteria;D_3__RCP2-54
443951706b3a619bf9904345b3cf6a5f	0	0	1	0	0	0	0	0	0	0	2	0	0	0	0	4	0	0	0	1	0	0	0	0	0	1	0	0	2	2	0	0	0	2	0	0	D_0__Bacteria;D_1__Actinobacteria;D_2__Acidimicrobiia;D_3__Microtrichales;D_4__uncultured;D_5__wastewater metagenome;D_6__wastewater metagenome
d0390b0bbbe1ced6fdda025ae2433788	0	2	1	0	0	3	1	3	6	2	0	0	0	4	3	1	0	11	0	0	0	0	0	7	1	6	1	5	1	4	2	1	0	1	3	2	D_0__Bacteria;D_1__Proteobacteria;D_2__Deltaproteobacteria;D_3__Myxococcales;D_4__BIrii41
a7c7189c658f7c3528d1adfa8f279ef9	0	0	0	0	0	0	0	1	0	0	0	0	3	2	2	0	4	0	0	3	1	0	2	3	4	1	1	1	0	3	0	0	1	0	0	0	D_0__Bacteria;D_1__Acidobacteria;D_2__Acidobacteriia;D_3__Solibacterales;D_4__Solibacteraceae (Subgroup 3)
0fd0e39cd119b343d1e8a097bf57f1e6	0	0	0	0	0	0	0	0	0	0	0	0	0	0	0	0	0	0	0	1	2	0	0	2	0	1	0	0	0	0	0	0	0	0	0	2	D_0__Bacteria;D_1__Chloroflexi;D_2__Chloroflexia;D_3__Chloroflexales;D_4__Roseiflexaceae;D_5__uncultured;D_6__uncultured Chloroflexaceae bacterium
77f1e151e4762625ef4cd5f585bf31c5	0	4	1	0	1	2	0	5	0	2	3	1	3	0	3	1	3	0	5	1	0	3	5	5	2	1	2	0	0	0	3	4	2	1	3	2	D_0__Bacteria;D_1__Proteobacteria
f2214c9fb2dc297c48d8d7840c1dc1b9	1	1	0	0	0	0	0	1	0	0	1	1	2	3	2	1	0	0	0	3	0	0	0	0	0	0	0	2	0	1	0	0	0	0	0	3	D_0__Bacteria;D_1__Proteobacteria;D_2__Alphaproteobacteria;D_3__Caulobacterales;D_4__Caulobacteraceae;D_5__uncultured
30f87a5743cd4a62c87e2ca73ce53ac0	0	0	0	2	0	0	0	0	2	1	0	0	0	0	0	0	0	0	0	0	0	0	0	0	0	0	1	1	0	0	0	0	0	0	0	0	D_0__Bacteria;D_1__Proteobacteria;D_2__Alphaproteobacteria;D_3__Acetobacterales;D_4__Acetobacteraceae;D_5__Acidicaldus
e434b11e3873d05b5210ae99828d8e24	0	0	0	0	0	0	0	1	3	0	0	1	0	0	0	1	0	0	0	0	0	0	0	0	0	0	0	2	0	0	1	0	0	0	0	1	D_0__Bacteria;D_1__Verrucomicrobia;D_2__Verrucomicrobiae;D_3__Pedosphaerales;D_4__Pedosphaeraceae;D_5__bacterium Ellin516;D_6__bacterium Ellin516
0f0a04a3f71d93d8b4fbcb489f8dce40	2	3	3	2	3	1	4	0	0	1	0	1	0	2	0	6	2	1	0	0	1	0	0	0	2	1	0	0	6	1	2	2	1	1	1	0	D_0__Bacteria;D_1__Bacteroidetes;D_2__Bacteroidia;D_3__Chitinophagales;D_4__Chitinophagaceae;D_5__uncultured
5a237ff9bf4ffd5914b5ee14ba00a903	0	0	0	0	1	0	0	0	0	0	0	0	0	0	0	0	0	0	0	0	0	2	0	0	0	0	0	0	0	0	2	2	1	2	1	2	D_0__Bacteria;D_1__Gemmatimonadetes;D_2__Gemmatimonadetes;D_3__Gemmatimonadales;D_4__Gemmatimonadaceae;D_5__Gemmatimonas;D_6__Gemmatimonadetes bacterium Ellin7146
66035707f14d7f3a483844996d9f3582	0	0	0	0	0	0	0	0	0	0	0	0	0	2	0	0	0	0	0	0	0	0	0	0	0	0	0	0	0	0	0	0	0	0	0	0	D_0__Bacteria;D_1__Proteobacteria;D_2__Deltaproteobacteria;D_3__Oligoflexales;D_4__Oligoflexaceae;D_5__Oligoflexus;D_6__uncultured delta proteobacterium
3cfec0653bed5006608ad25a737e0444	0	0	1	0	0	4	0	0	0	0	0	0	0	0	0	0	0	0	0	0	0	0	0	0	0	0	0	0	0	0	0	0	0	0	0	0	D_0__Bacteria;D_1__Proteobacteria;D_2__Alphaproteobacteria
6b7fe497c824dab890266e5675d08590	0	1	0	0	1	1	1	0	2	0	0	1	0	0	0	0	5	2	1	2	1	2	1	0	0	2	4	0	3	2	0	0	0	0	0	0	D_0__Bacteria;D_1__Actinobacteria;D_2__Thermoleophilia;D_3__Gaiellales;D_4__uncultured;D_5__bacterium Ellin6517;D_6__bacterium Ellin6517
ce629fcc999ced9481571f782da0f41d	0	0	1	0	0	0	0	0	0	0	2	0	0	0	0	0	0	0	0	0	0	0	0	0	0	0	0	0	0	0	0	0	0	1	0	0	D_0__Bacteria;D_1__Actinobacteria;D_2__Actinobacteria;D_3__Micromonosporales;D_4__Micromonosporaceae;D_5__Actinoplanes
18f2b40da4453a09c9344271e36e7efe	0	0	0	0	0	0	0	0	0	0	0	0	0	0	0	0	0	0	0	0	0	0	0	0	0	1	5	3	2	2	0	0	0	0	0	0	D_0__Bacteria;D_1__Proteobacteria;D_2__Gammaproteobacteria;D_3__Betaproteobacteriales;D_4__Nitrosomonadaceae;D_5__Ellin6067
843b2a6e208aedd222dc12ea51880cff	1	1	0	1	0	0	0	1	1	0	0	0	16	6	25	14	18	5	6	6	5	2	12	3	12	6	6	5	7	9	0	0	1	0	0	0	D_0__Bacteria;D_1__Acidobacteria;D_2__Acidobacteriia;D_3__Solibacterales;D_4__Solibacteraceae (Subgroup 3);D_5__Candidatus Solibacter;D_6__uncultured proteobacterium
5b4b26f73273bf35ad162714e1ab0034	0	0	0	0	0	0	0	1	0	2	0	0	0	0	1	0	0	0	1	0	0	0	0	0	0	0	1	0	2	0	0	0	0	0	0	0	D_0__Bacteria;D_1__Bacteroidetes;D_2__Bacteroidia;D_3__Chitinophagales;D_4__Chitinophagaceae;D_5__Parafilimonas;D_6__uncultured Chitinophagaceae bacterium
00b28116cac9b5236522b92bd4279c90	0	0	0	0	1	1	0	0	0	0	0	0	0	0	0	0	0	0	0	0	0	0	0	0	1	0	0	0	0	2	0	0	0	0	0	0	D_0__Bacteria;D_1__Actinobacteria;D_2__Actinobacteria;D_3__Micromonosporales;D_4__Micromonosporaceae;D_5__Hamadaea
7fd08cecefe706b9b107b5cf25e944f0	0	0	3	0	0	3	0	0	0	0	0	0	0	0	0	0	2	2	0	0	2	1	0	0	0	0	0	0	0	0	0	0	0	0	0	0	D_0__Bacteria;D_1__Bacteroidetes;D_2__Bacteroidia;D_3__Sphingobacteriales
22bb2b76b744fdfcecd1ffa15b9de883	0	0	0	0	0	0	0	0	0	0	0	0	0	0	1	2	0	0	0	0	0	0	0	1	0	2	0	2	0	2	0	0	0	0	0	0	D_0__Bacteria;D_1__Proteobacteria;D_2__Deltaproteobacteria;D_3__Myxococcales
26e73cc30dad3477f224f6ed0f862a16	1	0	0	0	0	0	0	0	0	0	0	0	13	3	0	2	0	1	0	0	0	0	0	0	0	0	0	0	0	0	0	0	0	0	0	0	D_0__Bacteria;D_1__Patescibacteria;D_2__Saccharimonadia;D_3__Saccharimonadales
5ad5b8768b4604418178801d3b0da75a	0	0	0	0	0	0	0	0	0	0	0	0	2	0	1	1	0	1	0	1	0	0	0	0	1	0	2	0	0	0	0	0	0	0	0	0	D_0__Bacteria;D_1__Gemmatimonadetes;D_2__Gemmatimonadetes;D_3__Gemmatimonadales;D_4__Gemmatimonadaceae;D_5__Gemmatimonas
9eba8257f17b1ab1aa9aeb3bc4856a49	5	1	0	3	7	2	3	1	4	0	0	5	0	0	0	0	0	0	0	0	0	2	0	0	0	0	0	2	0	0	0	3	5	0	2	2	D_0__Bacteria;D_1__Acidobacteria;D_2__Acidobacteriia;D_3__Solibacterales;D_4__Solibacteraceae (Subgroup 3);D_5__Bryobacter;D_6__Acidobacteria bacterium WX72
b5ec612174065072decd9336ea094ac1	0	6	0	0	0	0	0	0	2	0	0	0	0	0	0	6	0	0	0	0	0	0	2	0	0	1	2	10	6	5	0	3	1	0	7	5	D_0__Bacteria;D_1__Proteobacteria;D_2__Alphaproteobacteria;D_3__Rhizobiales;D_4__Xanthobacteraceae
99b508f800244c15171831fb7f129174	5	0	0	1	0	0	1	1	0	1	0	3	0	0	1	5	0	2	0	2	0	0	0	0	2	0	0	0	0	0	0	3	6	0	0	24	D_0__Bacteria;D_1__Proteobacteria;D_2__Gammaproteobacteria;D_3__Pseudomonadales;D_4__Pseudomonadaceae;D_5__Pseudomonas
174be8cb117b5eaf0f2458a358e1edec	5	2	2	7	1	0	2	0	1	8	2	0	0	0	5	1	3	3	0	2	0	2	4	6	6	0	1	2	3	3	4	1	1	3	4	0	D_0__Bacteria;D_1__Actinobacteria;D_2__Actinobacteria;D_3__Micrococcales;D_4__Sanguibacteraceae;D_5__Sanguibacter
8d43c9e6214b78d1cdd1cac58b751ed7	26	55	31	68	23	25	15	17	14	21	28	13	49	18	4	5	11	21	31	15	12	14	26	19	5	34	38	11	7	16	11	9	18	9	15	6	D_0__Bacteria;D_1__Bacteroidetes;D_2__Bacteroidia;D_3__Chitinophagales;D_4__Saprospiraceae;D_5__Phaeodactylibacter;D_6__uncultured Haliscomenobacter sp.
091a31e7cae71862e3a27bf9ffd0e594	0	0	0	0	0	0	0	1	0	0	1	0	2	0	0	1	0	1	2	0	0	0	0	1	0	0	0	0	0	4	0	0	0	0	0	0	D_0__Bacteria;D_1__Proteobacteria;D_2__Deltaproteobacteria;D_3__Myxococcales;D_4__Polyangiaceae;D_5__Pajaroellobacter
0d08b36691465b82b514ee7876791ef8	2	0	1	4	3	0	0	1	0	0	2	0	0	0	0	0	0	1	0	0	0	0	0	0	0	0	0	0	0	0	0	0	1	0	1	0	D_0__Bacteria;D_1__Acidobacteria;D_2__Acidobacteriia;D_3__Solibacterales;D_4__Solibacteraceae (Subgroup 3);D_5__Bryobacter;D_6__uncultured actinobacterium
c7943e77a35af3036878c08b9b19b6ce	5	1	1	2	1	1	2	1	0	4	0	1	0	1	6	1	2	2	5	4	4	1	5	3	9	2	4	6	3	8	2	1	3	0	1	2	D_0__Bacteria;D_1__Actinobacteria;D_2__Actinobacteria;D_3__Corynebacteriales;D_4__Mycobacteriaceae;D_5__Mycobacterium
c7042116d2cb3ddae576a9625cf6eabb	0	0	2	0	0	0	0	2	0	1	0	0	4	0	2	2	2	0	0	1	0	0	0	0	0	3	0	0	3	0	0	1	0	0	0	2	D_0__Bacteria;D_1__Patescibacteria;D_2__Saccharimonadia;D_3__Saccharimonadales;D_4__uncultured Epsilonproteobacteria bacterium;D_5__uncultured Epsilonproteobacteria bacterium;D_6__uncultured Epsilonproteobacteria bacterium
957679b8f98cc4922efbcc6a9489374b	0	0	0	0	0	0	0	0	0	0	0	0	0	0	0	0	0	0	0	0	2	0	0	0	3	0	2	0	0	0	0	0	1	3	0	4	D_0__Bacteria;D_1__Chloroflexi;D_2__JG30-KF-CM66;D_3__uncultured Armatimonadetes bacterium;D_4__uncultured Armatimonadetes bacterium;D_5__uncultured Armatimonadetes bacterium;D_6__uncultured Armatimonadetes bacterium
b42dc0b22346e1fcb3b1705a45e84774	0	1	0	0	0	0	0	2	1	2	0	0	0	0	0	0	2	0	1	0	0	1	0	0	0	0	0	0	0	0	1	0	1	0	0	0	D_0__Bacteria;D_1__Proteobacteria;D_2__Gammaproteobacteria;D_3__Betaproteobacteriales;D_4__TRA3-20
f91176fed6cc8d237bfa11706106ff76	0	0	2	1	0	0	3	0	0	0	0	2	3	3	3	13	0	12	0	1	0	0	4	0	0	0	0	3	3	1	0	0	0	0	1	0	D_0__Bacteria;D_1__Bacteroidetes;D_2__Bacteroidia;D_3__Flavobacteriales;D_4__Flavobacteriaceae;D_5__Flavobacterium
ca5df4b08741a980f2e09c86533bc4ba	0	1	2	0	0	2	2	2	0	0	0	2	2	0	0	0	0	0	5	0	2	0	4	0	0	2	2	0	1	3	0	1	1	0	3	0	D_0__Bacteria;D_1__Gemmatimonadetes;D_2__Gemmatimonadetes;D_3__Gemmatimonadales;D_4__Gemmatimonadaceae;D_5__Gemmatimonas;D_6__bacterium Ellin5220
af9512f216e43b417fe03b0f8c11a19e	0	1	0	1	0	0	0	1	0	0	0	0	0	0	0	0	0	0	0	0	0	0	0	0	0	0	0	0	1	0	0	0	0	0	0	0	D_0__Bacteria;D_1__Acidobacteria;D_2__Subgroup 17
6541d60066b7ad90e30ad01765c74b70	5	0	1	0	2	2	0	0	0	0	0	0	0	0	2	0	0	0	0	0	0	0	0	0	2	0	1	0	0	0	0	0	0	0	1	0	D_0__Bacteria;D_1__Proteobacteria;D_2__Gammaproteobacteria;D_3__Betaproteobacteriales;D_4__Nitrosomonadaceae;D_5__Ellin6067
9198bb5543d7606b1204cce6b1ecc07b	0	0	0	0	0	0	0	0	0	1	0	0	1	0	0	0	0	0	0	0	0	1	2	2	1	0	0	1	0	1	0	0	0	0	0	0	D_0__Bacteria;D_1__Acidobacteria;D_2__Acidobacteriia;D_3__Solibacterales;D_4__Solibacteraceae (Subgroup 3);D_5__Candidatus Solibacter
f5075267187e0621ab235e8ba1699361	0	0	0	3	0	4	0	0	0	0	0	0	0	0	0	0	0	0	0	0	0	0	0	0	0	0	0	0	0	0	0	0	0	0	0	0	D_0__Bacteria;D_1__Proteobacteria;D_2__Gammaproteobacteria;D_3__Betaproteobacteriales;D_4__Hydrogenophilaceae;D_5__Thiobacillus
de843d34f98a6174794a1e66669cead5	0	0	0	0	0	0	0	0	0	2	0	0	0	0	0	0	0	0	0	0	2	0	2	0	0	0	0	0	0	0	0	2	1	0	0	0	D_0__Bacteria;D_1__Proteobacteria;D_2__Deltaproteobacteria;D_3__NB1-j;D_4__uncultured Desulfoglaeba sp.;D_5__uncultured Desulfoglaeba sp.;D_6__uncultured Desulfoglaeba sp.
068eb5b98724bec03dda28ddf5238138	0	0	0	0	0	3	0	0	1	0	2	0	0	0	0	0	0	0	0	0	0	0	0	0	0	0	0	0	0	0	0	0	0	0	0	0	D_0__Bacteria;D_1__Proteobacteria;D_2__Gammaproteobacteria;D_3__Betaproteobacteriales;D_4__TRA3-20
7f8de7fbd7407f86db90d62c16ff3c96	50	43	14	35	46	34	40	47	80	34	56	42	35	38	29	84	59	17	25	61	28	45	27	34	35	37	38	23	53	29	35	34	42	34	27	67	D_0__Bacteria;D_1__Proteobacteria;D_2__Alphaproteobacteria;D_3__Rhizobiales;D_4__Xanthobacteraceae
20a4f298d54e9c824660603cacb1643b	0	0	0	1	2	0	0	1	0	0	0	0	0	3	2	0	0	0	0	3	1	2	0	0	0	0	4	3	2	0	0	0	0	0	0	2	D_0__Bacteria;D_1__Actinobacteria;D_2__Acidimicrobiia;D_3__uncultured
c1d6abf92891cf349633edb873896f87	0	0	0	0	0	0	0	0	0	0	0	0	0	2	0	0	0	0	0	0	0	0	0	0	0	0	0	0	2	2	0	0	0	0	0	0	D_0__Bacteria;D_1__Chloroflexi;D_2__KD4-96;D_3__uncultured Longilinea sp.;D_4__uncultured Longilinea sp.;D_5__uncultured Longilinea sp.;D_6__uncultured Longilinea sp.
489c85026beb804127b83f630f13f7e6	0	0	0	0	0	0	0	0	0	0	0	0	0	0	0	0	0	0	0	0	0	0	0	0	0	0	4	0	0	0	0	0	2	2	2	1	D_0__Bacteria;D_1__Proteobacteria;D_2__Gammaproteobacteria;D_3__Diplorickettsiales;D_4__Diplorickettsiaceae;D_5__Aquicella
c7946b67885c9ebb69c5f057e7ed9909	0	0	2	0	2	1	2	1	3	0	2	0	5	4	1	6	0	0	0	1	3	0	0	2	5	4	2	3	0	2	0	0	2	2	0	1	D_0__Bacteria;D_1__Acidobacteria;D_2__Acidobacteriia;D_3__Solibacterales;D_4__Solibacteraceae (Subgroup 3);D_5__Candidatus Solibacter
ef80a3f060c75f4aea9ca7098dcf640c	0	0	0	0	0	0	0	0	0	0	0	0	0	0	0	0	0	0	0	4	0	2	2	0	0	0	0	0	0	0	0	3	0	0	0	0	D_0__Bacteria;D_1__Proteobacteria;D_2__Gammaproteobacteria;D_3__Diplorickettsiales;D_4__Diplorickettsiaceae;D_5__uncultured
b7386a04df102ef323d229d85236c129	2	1	1	2	1	1	1	2	1	0	0	0	0	0	0	0	0	0	0	0	0	0	0	0	0	0	0	0	0	0	0	0	0	0	0	0	D_0__Bacteria;D_1__Proteobacteria;D_2__Gammaproteobacteria;D_3__Betaproteobacteriales;D_4__Nitrosomonadaceae;D_5__mle1-7;D_6__uncultured Rhodocyclaceae bacterium
6452247663dcb062cfdf4b5aeb454192	2	5	1	2	1	3	10	5	2	5	5	2	0	4	0	2	0	3	3	1	3	3	4	0	1	1	2	0	3	3	2	4	7	0	1	2	D_0__Bacteria;D_1__Actinobacteria;D_2__Acidimicrobiia;D_3__IMCC26256;D_4__uncultured Ferrimicrobium sp.;D_5__uncultured Ferrimicrobium sp.;D_6__uncultured Ferrimicrobium sp.
983ba7f1f241b0cff3ffa0eb06483ed5	0	1	1	3	0	0	0	0	0	0	0	0	0	0	0	3	0	0	3	2	0	2	4	0	0	0	0	0	3	0	0	2	0	0	0	0	D_0__Bacteria;D_1__Proteobacteria;D_2__Gammaproteobacteria
5dd0f82feac3ac07b9d102ad7328e63f	0	0	0	0	0	0	0	0	0	0	0	0	0	0	0	0	2	0	0	0	0	0	0	2	0	0	2	4	0	0	0	0	0	0	0	0	D_0__Bacteria;D_1__Proteobacteria;D_2__Gammaproteobacteria;D_3__Betaproteobacteriales;D_4__SC-I-84
666f0fe8983a8d5020d007f0207dd71f	0	0	0	0	0	0	0	0	0	2	2	0	1	1	0	0	0	0	0	0	3	0	1	0	0	0	1	0	0	1	0	0	0	3	1	0	D_0__Bacteria;D_1__Proteobacteria;D_2__Gammaproteobacteria;D_3__Betaproteobacteriales;D_4__TRA3-20
185d8f60658a643a5ec90e3ca2fc90fe	0	0	0	1	0	0	0	0	0	0	0	0	0	0	0	0	0	0	0	0	0	1	0	0	0	0	0	0	0	0	0	0	0	0	0	2	D_0__Bacteria
95d0cdd4d9be393c65aa317e243c8364	0	0	0	0	0	0	0	0	0	0	1	0	0	0	0	0	0	0	0	0	0	1	0	0	0	0	0	0	0	0	0	0	0	0	0	0	D_0__Bacteria;D_1__Bacteroidetes;D_2__Bacteroidia;D_3__Sphingobacteriales
7555038864d26a4935c795e3ca4e2e1f	0	0	2	0	0	0	0	0	0	0	0	0	0	1	0	0	3	0	0	0	2	0	0	0	1	2	1	0	3	0	0	0	0	0	0	0	D_0__Bacteria;D_1__Acidobacteria;D_2__Blastocatellia (Subgroup 4);D_3__Blastocatellales;D_4__Blastocatellaceae
2196d9d13c36150a3695487d5684cb73	0	0	0	0	0	0	0	0	0	0	0	0	0	0	0	0	0	0	0	0	0	2	0	1	0	1	0	0	0	0	0	0	0	0	0	0	D_0__Bacteria;D_1__Bacteroidetes;D_2__Bacteroidia;D_3__Chitinophagales;D_4__Chitinophagaceae
5ad838b014921bc263548a569d5c6b44	0	8	0	0	0	0	0	0	0	0	0	3	3	0	3	0	0	0	2	2	2	2	4	3	0	0	0	4	2	3	0	1	0	2	6	1	D_0__Bacteria;D_1__Gemmatimonadetes;D_2__Gemmatimonadetes;D_3__Gemmatimonadales;D_4__Gemmatimonadaceae
0f968f2ed97892a0c69ba6e6f9602dfb	0	0	0	0	0	0	0	2	0	0	0	0	0	1	2	0	0	0	4	0	0	0	0	0	0	0	0	2	2	0	0	0	0	2	1	0	D_0__Bacteria;D_1__Proteobacteria;D_2__Deltaproteobacteria;D_3__Myxococcales;D_4__Haliangiaceae;D_5__Haliangium;D_6__myxobacterium AT3-03
44d7070812678e644afd70074ce66760	0	0	0	0	0	0	0	0	0	0	0	0	2	2	0	0	2	0	0	0	1	0	3	0	0	0	0	13	0	0	0	0	0	0	0	0	D_0__Bacteria;D_1__Gemmatimonadetes;D_2__Gemmatimonadetes;D_3__Gemmatimonadales;D_4__Gemmatimonadaceae;D_5__uncultured
b7edd609eea03ecb87d4809e542fcf5a	8	3	14	18	16	11	9	10	5	15	6	27	8	7	9	9	22	19	6	5	14	7	14	35	6	12	14	11	9	16	11	6	7	10	9	10	D_0__Bacteria;D_1__Bacteroidetes;D_2__Bacteroidia;D_3__Chitinophagales;D_4__Chitinophagaceae
0edc13c62e370a88d1a718fa76a6fb32	0	0	0	0	0	0	0	0	0	0	0	0	0	0	0	0	0	1	0	0	0	0	0	0	0	0	0	0	0	0	0	0	0	0	1	0	D_0__Bacteria;D_1__Actinobacteria;D_2__Thermoleophilia;D_3__Gaiellales;D_4__uncultured
dceea4199d041f03630734d7b4880694	0	0	0	0	0	0	1	0	0	0	0	0	0	0	0	0	0	0	0	0	0	0	0	0	0	0	0	0	0	0	0	3	1	0	0	0	D_0__Bacteria;D_1__Proteobacteria;D_2__Gammaproteobacteria;D_3__Betaproteobacteriales;D_4__Burkholderiaceae;D_5__Cupriavidus
8adf48c5b323291b6139c267d50df0f2	0	0	0	2	0	1	0	0	0	0	0	0	4	0	0	2	0	0	0	0	0	0	0	0	0	0	1	0	0	0	0	0	0	0	0	0	D_0__Bacteria;D_1__Bacteroidetes;D_2__Bacteroidia;D_3__Chitinophagales;D_4__Chitinophagaceae;D_5__uncultured;D_6__uncultured Ferruginibacter sp.
c04e0f95b4315b94cd4dcd439e0ccaed	0	0	0	0	0	0	0	0	0	0	0	0	0	0	0	1	0	0	0	0	0	0	0	1	0	0	1	0	0	0	0	0	0	0	0	0	D_0__Bacteria;D_1__Actinobacteria;D_2__Thermoleophilia;D_3__Gaiellales;D_4__uncultured
ce1caf92d6889a66805fea5e5be99215	0	0	0	0	0	1	0	0	0	2	0	0	0	0	0	0	0	0	0	0	0	0	0	0	0	0	0	0	0	0	1	1	2	0	0	0	D_0__Bacteria;D_1__Proteobacteria;D_2__Deltaproteobacteria;D_3__Myxococcales;D_4__Haliangiaceae;D_5__Haliangium;D_6__uncultured Polyangiaceae bacterium
b0b21b88e1cbb5ab551842800b668c12	1	0	0	2	0	0	0	0	0	0	0	0	2	0	2	0	0	0	0	0	0	0	0	0	2	0	0	0	0	0	0	0	0	0	0	0	D_0__Bacteria;D_1__Actinobacteria;D_2__Actinobacteria;D_3__Micrococcales;D_4__Microbacteriaceae;D_5__Agromyces
a8a10363f78fbe08c10cf2225d340a8a	0	0	1	0	1	0	0	0	0	0	0	0	0	0	0	0	0	0	0	0	0	0	0	0	0	0	0	0	0	0	0	0	0	0	0	0	D_0__Bacteria;D_1__Proteobacteria;D_2__Gammaproteobacteria;D_3__Betaproteobacteriales;D_4__Nitrosomonadaceae;D_5__MND1;D_6__uncultured Methylococcales bacterium
55bcf0586f168ede8bff1c419ca09c34	0	1	0	0	4	0	0	2	0	0	0	0	0	0	0	0	0	0	0	0	0	0	0	0	0	0	0	0	2	0	0	0	0	0	0	4	D_0__Bacteria;D_1__Gemmatimonadetes;D_2__Gemmatimonadetes;D_3__Gemmatimonadales;D_4__Gemmatimonadaceae;D_5__Gemmatimonas;D_6__bacterium Ellin5290
4b28bd52fd87bce9bef1830b52337aef	0	0	0	2	0	0	1	0	0	0	0	0	0	1	0	0	0	2	0	0	4	0	0	0	1	0	0	0	2	0	0	0	0	0	0	0	D_0__Bacteria;D_1__Bacteroidetes;D_2__Bacteroidia;D_3__Flavobacteriales;D_4__Flavobacteriaceae;D_5__Flavobacterium
7bb626cab85f8a7cf449b9023cee3b7c	2	0	1	0	0	0	0	0	0	0	0	0	0	0	0	0	0	1	0	0	0	0	0	0	0	0	0	0	0	2	0	0	0	0	0	0	D_0__Bacteria;D_1__Actinobacteria;D_2__Actinobacteria
82ba60c0fa405ee2ac1c7ee9d3a06c3e	0	1	0	0	0	0	0	0	0	0	0	0	0	0	1	0	0	3	0	0	0	0	0	2	2	0	0	0	0	0	0	0	0	0	0	0	D_0__Bacteria;D_1__Actinobacteria;D_2__Acidimicrobiia;D_3__Microtrichales
52c6cb8545b205934d8d7a965324e9af	0	0	0	0	0	0	1	0	0	0	0	0	0	0	0	0	0	1	1	0	0	0	0	0	0	0	0	0	0	0	0	0	0	0	0	0	D_0__Bacteria;D_1__Proteobacteria;D_2__Alphaproteobacteria;D_3__uncultured
4f191f488f155a42a8aa718592bcf77e	0	2	1	0	0	2	0	1	0	2	0	0	2	2	2	0	0	1	0	0	0	0	0	0	0	0	1	0	0	3	0	0	0	2	1	3	D_0__Bacteria;D_1__Acidobacteria;D_2__Holophagae;D_3__Subgroup 7;D_4__uncultured Desulfovirga sp.;D_5__uncultured Desulfovirga sp.;D_6__uncultured Desulfovirga sp.
c1d106b689c1b9efcce053a2e1317c63	2	1	5	1	1	3	1	4	3	4	2	4	1	5	0	0	0	3	1	1	2	0	2	0	0	4	5	0	0	2	2	5	4	0	3	2	D_0__Bacteria;D_1__Gemmatimonadetes;D_2__Gemmatimonadetes;D_3__Gemmatimonadales;D_4__Gemmatimonadaceae;D_5__uncultured;D_6__Gemmatimonadetes bacterium LX87
e0ce55c6f1bc83ba2d0f010c334a260b	0	0	0	3	1	0	0	0	0	3	1	0	0	0	0	0	0	0	0	0	0	3	0	0	0	0	0	0	0	0	0	3	2	2	1	0	D_0__Bacteria;D_1__Proteobacteria;D_2__Gammaproteobacteria
3fb0a8d6d0194ebbac2cf8958197d3e2	0	0	0	0	0	0	0	0	0	0	0	0	0	0	0	0	0	0	0	0	0	0	0	0	0	0	0	2	0	2	0	0	0	1	4	0	D_0__Bacteria
4b698c827b3be2ecd12e19d85ea12d55	0	0	0	0	0	0	0	0	0	0	0	0	0	0	0	0	0	0	0	1	1	0	0	0	0	0	1	0	0	0	0	1	0	3	2	4	D_0__Bacteria;D_1__Acidobacteria;D_2__Acidobacteriia;D_3__Solibacterales;D_4__Solibacteraceae (Subgroup 3)
1ae2fe49fd9c8a15a1475707c2d7947c	0	0	0	0	0	0	0	0	2	0	0	0	6	1	0	2	2	3	4	1	5	2	1	1	1	5	1	3	0	1	0	0	0	0	0	0	D_0__Bacteria;D_1__Acidobacteria;D_2__Acidobacteriia;D_3__Solibacterales;D_4__Solibacteraceae (Subgroup 3);D_5__Candidatus Solibacter;D_6__Candidatus Solibacter usitatus Ellin6076
319f72a9874613d951ff476dc17f108f	0	3	0	0	0	2	1	0	0	0	2	0	1	0	2	0	0	0	0	0	0	0	0	0	0	0	1	2	0	0	1	0	0	2	0	5	D_0__Bacteria;D_1__Spirochaetes;D_2__Spirochaetia;D_3__Spirochaetales;D_4__Spirochaetaceae;D_5__Spirochaeta 2;D_6__Spirochaeta sp.
fbd92936499dd03e8204c7a331e1f327	0	2	0	1	2	0	1	1	0	0	0	0	0	0	0	0	0	0	0	0	0	0	0	0	0	0	0	0	0	0	0	0	0	0	0	0	D_0__Bacteria;D_1__Acidobacteria;D_2__Acidobacteriia;D_3__Acidobacteriales
2ddf3eb464f9fe8832aba8f7c2ec6c9b	1	2	3	1	2	0	0	1	2	0	1	0	2	2	4	0	4	0	0	2	11	1	2	2	2	1	4	0	0	4	2	3	0	3	3	4	D_0__Bacteria;D_1__Proteobacteria;D_2__Gammaproteobacteria
e8aba3fc47c1c019630d0e0283ca0193	6	0	0	0	0	1	0	0	0	0	0	0	0	1	0	0	1	0	0	0	1	0	0	6	4	0	0	0	3	3	0	3	1	0	0	2	D_0__Bacteria;D_1__Proteobacteria;D_2__Deltaproteobacteria;D_3__Myxococcales;D_4__Haliangiaceae;D_5__Haliangium
97a645d1ebafe757d532abc94bdaf080	3	0	0	0	0	1	0	2	2	0	1	0	1	4	2	3	3	3	5	1	0	1	4	3	5	2	5	4	7	1	0	3	0	1	3	0	D_0__Bacteria;D_1__Proteobacteria;D_2__Alphaproteobacteria;D_3__Rhizobiales;D_4__Rhizobiales Incertae Sedis;D_5__uncultured
ee89a2df754dfae21a9d58fa3495926a	0	1	5	0	0	1	0	0	2	0	0	0	0	0	0	0	0	6	0	0	0	1	0	0	0	0	0	0	0	0	0	0	0	0	0	0	D_0__Bacteria;D_1__Acidobacteria;D_2__Acidobacteriia;D_3__Solibacterales;D_4__Solibacteraceae (Subgroup 3);D_5__Candidatus Solibacter;D_6__bacterium Ellin6505
8a636db05779774dbe0f2d2664b2cf17	0	6	0	0	0	3	0	0	0	0	2	0	0	0	0	0	5	0	0	0	0	5	3	0	0	0	0	0	0	6	0	0	0	0	3	0	D_0__Bacteria;D_1__Acidobacteria;D_2__Thermoanaerobaculia;D_3__Thermoanaerobaculales;D_4__Thermoanaerobaculaceae;D_5__Subgroup 10
97c66d4a859efc291e6df4a7d3582be0	0	0	0	0	2	0	0	0	0	0	1	0	0	0	0	0	0	0	0	0	0	0	0	1	0	0	0	0	0	2	0	1	0	0	0	0	D_0__Bacteria;D_1__Latescibacteria
b4db27c1f5c49a1ac103a306f25e2ee0	0	0	1	0	0	0	0	0	0	0	0	0	0	0	0	0	0	0	0	0	0	2	0	0	0	0	0	0	0	0	0	2	0	2	1	0	D_0__Bacteria;D_1__Verrucomicrobia;D_2__Verrucomicrobiae;D_3__Pedosphaerales;D_4__Pedosphaeraceae
a22d6e26de35309eed885630dfd663ed	0	0	0	0	0	0	0	2	1	0	2	0	0	0	0	2	0	0	0	0	0	0	0	0	0	0	0	0	0	0	0	0	0	0	0	0	D_0__Bacteria;D_1__Proteobacteria;D_2__Alphaproteobacteria
ceb449744d87cd42a735a8f2cb993a5c	3	0	0	4	4	3	2	0	2	4	1	5	0	0	0	0	2	0	0	0	0	0	2	0	0	0	1	0	0	2	3	2	1	1	3	3	D_0__Bacteria;D_1__Proteobacteria;D_2__Gammaproteobacteria;D_3__Betaproteobacteriales;D_4__Burkholderiaceae
dca9e4d691b545c18151c4943b663845	1	0	6	3	1	6	0	0	0	1	3	0	0	2	0	0	0	0	0	0	2	0	0	0	0	2	0	0	0	0	0	1	0	1	3	0	D_0__Bacteria;D_1__Bacteroidetes;D_2__Bacteroidia
4ff307acb929049d7743e1d0036e7721	0	0	0	0	0	0	0	0	2	2	0	0	0	0	1	0	0	0	0	0	0	0	0	0	0	0	0	0	0	2	0	1	0	0	0	0	D_0__Bacteria;D_1__Proteobacteria;D_2__Gammaproteobacteria;D_3__Betaproteobacteriales;D_4__Burkholderiaceae;D_5__Cupriavidus
2283e8512b22b0dd93e8c858b7d8bbbb	0	0	0	0	0	0	0	0	0	0	0	0	0	1	1	0	1	0	0	0	1	0	6	3	0	0	0	1	0	0	0	0	0	0	0	0	D_0__Bacteria;D_1__Proteobacteria;D_2__Alphaproteobacteria;D_3__Rhizobiales;D_4__Devosiaceae;D_5__Devosia
c0a750c4569e7d4ab3f3f2e1a6ceaa2f	0	3	0	1	0	0	0	0	0	0	0	0	0	0	0	0	0	0	0	2	1	0	3	0	0	0	0	0	3	0	0	0	0	0	0	0	D_0__Bacteria;D_1__Gemmatimonadetes;D_2__Gemmatimonadetes;D_3__Gemmatimonadales;D_4__Gemmatimonadaceae;D_5__Gemmatimonas
51ac409b3de6c565664d5dcc48d46dbf	0	0	0	0	0	0	0	0	0	0	0	0	1	3	0	0	0	3	2	1	1	0	0	0	0	0	0	1	0	3	0	0	0	0	0	0	D_0__Bacteria;D_1__Chloroflexi;D_2__KD4-96;D_3__uncultured Longilinea sp.;D_4__uncultured Longilinea sp.;D_5__uncultured Longilinea sp.;D_6__uncultured Longilinea sp.
7a3f1470febc9ef4a55ef85eacfbc311	9	1	5	5	3	4	3	0	3	3	1	4	0	0	0	0	0	2	0	0	0	3	1	0	1	0	0	1	5	0	6	1	4	6	2	0	D_0__Bacteria;D_1__Proteobacteria;D_2__Alphaproteobacteria;D_3__Sphingomonadales;D_4__Sphingomonadaceae;D_5__Sphingomonas
6c8999ae5ee414cf1c6049f7feacd4d8	3	0	0	0	0	0	0	0	0	0	0	3	0	0	0	0	0	0	0	0	0	0	0	0	0	0	2	0	2	2	2	0	0	0	2	0	D_0__Bacteria;D_1__Actinobacteria;D_2__Acidimicrobiia;D_3__Microtrichales;D_4__Microtrichaceae;D_5__IMCC26207;D_6__Actinobacteria bacterium IMCC26207
7a8b095f8931a1cfec2112bc0e107f25	0	4	2	0	2	1	2	0	1	2	6	0	2	3	2	11	0	0	0	0	0	4	2	1	0	0	5	6	0	3	0	2	0	3	5	3	D_0__Bacteria;D_1__Bacteroidetes;D_2__Bacteroidia;D_3__Chitinophagales;D_4__Chitinophagaceae;D_5__Niastella
5805ce75190e5bc84de8ad594fd06401	0	1	0	0	0	0	0	0	0	0	0	0	0	2	0	0	0	0	0	0	0	1	3	0	0	0	2	0	0	0	0	0	0	0	0	0	D_0__Bacteria;D_1__Proteobacteria;D_2__Alphaproteobacteria;D_3__Rhizobiales;D_4__Xanthobacteraceae
7f14d44adf7f324d5b00c17660103b16	0	0	3	0	2	2	1	0	0	2	2	1	0	1	3	0	1	4	2	0	5	2	1	0	1	4	0	2	1	2	1	1	0	0	0	0	D_0__Bacteria;D_1__Proteobacteria;D_2__Alphaproteobacteria;D_3__Rhizobiales
b8d53711074266c6eca1340965d9b8a7	0	2	0	0	0	5	0	0	0	3	0	0	1	0	0	0	0	0	0	3	0	0	2	0	0	0	0	0	0	0	0	3	0	1	1	0	D_0__Bacteria;D_1__Proteobacteria;D_2__Alphaproteobacteria;D_3__Rhodospirillales;D_4__Rhodopirillaceae;D_5__Defluviicoccus;D_6__uncultured Defluviicoccus sp.
ee7cf544126e52e11c190966f3fc0a2b	0	0	0	1	0	0	0	0	0	0	0	0	0	0	0	0	0	0	0	0	0	0	0	3	0	0	0	0	1	0	0	1	0	0	0	0	D_0__Bacteria;D_1__Proteobacteria;D_2__Alphaproteobacteria;D_3__Caulobacterales;D_4__Hyphomonadaceae;D_5__SWB02;D_6__alpha proteobacterium U9-1i
853d68155112cd92f98bed9d48fad510	0	0	1	0	0	1	0	0	0	0	1	1	0	0	0	5	0	0	0	1	0	0	0	0	0	0	0	0	0	0	0	2	0	0	0	3	D_0__Bacteria;D_1__Proteobacteria;D_2__Gammaproteobacteria;D_3__Betaproteobacteriales;D_4__Methylophilaceae;D_5__Methylophilus
93e2719fcefd47c7b5134fa03f0fffbb	0	0	0	2	1	0	0	4	1	0	0	1	0	0	0	1	0	0	0	0	0	0	0	0	0	2	0	0	0	0	0	0	0	0	0	0	D_0__Bacteria;D_1__Verrucomicrobia;D_2__Verrucomicrobiae;D_3__Pedosphaerales;D_4__Pedosphaeraceae;D_5__bacterium Ellin516;D_6__bacterium Ellin516
597790b1bda218e064db6befd9e1b91a	0	0	0	0	0	1	0	0	0	3	1	0	1	0	0	0	0	4	3	0	0	1	2	0	2	1	2	6	0	0	0	0	0	3	1	1	D_0__Bacteria;D_1__Proteobacteria;D_2__Alphaproteobacteria;D_3__Rhizobiales;D_4__Hyphomicrobiaceae;D_5__Hyphomicrobium;D_6__bacterium CB03
0d8a7973ca882bab71d1ccfd0b053156	0	0	0	1	1	0	0	1	2	0	0	0	0	0	0	2	0	0	0	0	0	0	0	0	0	1	0	0	0	0	0	0	0	0	0	0	D_0__Bacteria;D_1__Acidobacteria;D_2__Acidobacteriia;D_3__Solibacterales;D_4__Solibacteraceae (Subgroup 3);D_5__Candidatus Solibacter;D_6__bacterium Ellin7504
04f681629f0347892d233f68b64ad150	0	1	0	3	4	0	0	0	1	0	0	0	0	0	0	3	0	0	0	1	0	0	0	0	3	0	0	0	0	0	1	0	0	0	0	3	D_0__Bacteria;D_1__Proteobacteria;D_2__Deltaproteobacteria;D_3__Myxococcales;D_4__Haliangiaceae;D_5__Haliangium
8296698193cf991145f7175bc79fa0ef	1	2	1	1	4	2	0	4	17	5	1	3	2	3	3	13	1	0	0	3	1	6	0	1	8	0	0	0	4	7	2	0	0	3	1	1	D_0__Bacteria;D_1__Gemmatimonadetes;D_2__Gemmatimonadetes;D_3__Gemmatimonadales;D_4__Gemmatimonadaceae;D_5__uncultured;D_6__Gemmatimonadetes bacterium WWH24
638c61b83f9e36a3cc1c4a191ec762ae	2	0	0	3	3	4	5	3	1	2	3	8	4	0	0	4	0	3	0	2	5	1	3	2	0	1	4	0	0	0	4	3	1	1	0	5	D_0__Bacteria;D_1__Proteobacteria;D_2__Deltaproteobacteria;D_3__Myxococcales;D_4__Haliangiaceae;D_5__Haliangium;D_6__bacterium Ellin6502
f4bbb3665f4ff05cc6933a4fe940856c	0	0	0	0	0	0	0	0	0	0	0	0	0	0	0	0	0	0	0	3	0	0	0	0	0	0	0	0	0	0	0	0	0	0	0	0	D_0__Bacteria;D_1__Proteobacteria;D_2__Alphaproteobacteria
7da5dc499d79a8d42a178d1d6517abe8	0	1	3	0	1	3	0	1	0	0	2	0	2	1	1	0	0	0	0	1	0	0	0	0	0	0	0	0	3	0	2	1	1	4	2	3	D_0__Archaea;D_1__Thaumarchaeota;D_2__Nitrososphaeria;D_3__Nitrososphaerales;D_4__Nitrososphaeraceae;D_5__Candidatus Nitrososphaera
b1e072d83d9ed9bd220c0dadde9ecef1	2	0	0	0	1	0	0	1	3	3	1	0	0	0	0	1	0	0	0	0	0	0	0	0	0	0	1	2	0	0	3	2	0	1	2	0	D_0__Bacteria;D_1__Proteobacteria;D_2__Gammaproteobacteria;D_3__Betaproteobacteriales;D_4__Sulfuricellaceae;D_5__Sulfuricella
498e4fd2df050bc53ddbc68dc8048a97	1	0	0	3	0	0	0	0	0	0	0	1	0	0	0	0	0	3	0	0	0	0	0	0	0	0	0	0	0	0	0	0	0	0	1	0	D_0__Bacteria;D_1__Bacteroidetes;D_2__Bacteroidia;D_3__Bacteroidales;D_4__Prevotellaceae;D_5__Prevotella 6;D_6__Prevotella colorans
87a4f922ba654127cc511f212f8509fe	2	2	0	1	2	0	0	0	0	0	0	0	0	0	0	0	0	0	0	0	0	1	0	0	0	1	0	0	0	0	0	2	2	0	0	0	D_0__Bacteria;D_1__Rokubacteria;D_2__NC10;D_3__Rokubacteriales;D_4__uncultured soil bacterium;D_5__uncultured soil bacterium;D_6__uncultured soil bacterium
d900f976a461f033616fc93e8463f970	0	2	0	0	0	0	0	0	0	0	0	0	1	0	0	3	0	0	0	2	0	0	0	0	0	0	0	0	0	0	0	0	0	0	1	0	D_0__Bacteria;D_1__Proteobacteria;D_2__Deltaproteobacteria;D_3__Myxococcales;D_4__Haliangiaceae;D_5__Haliangium
003bad3bb3d6445ec2c79317d38219da	0	0	0	0	0	0	0	0	0	0	0	0	0	2	0	0	0	0	0	0	0	0	0	0	0	0	0	0	0	0	0	0	0	0	3	0	D_0__Bacteria;D_1__Firmicutes;D_2__Erysipelotrichia;D_3__Erysipelotrichales;D_4__Erysipelotrichaceae;D_5__Holdemanella;D_6__Holdemanella biformis DSM 3989
995f98ee4483c3eb324d0f793dbead2c	0	0	0	4	0	0	0	0	0	0	0	0	0	1	0	1	0	0	0	0	0	0	0	0	0	0	0	0	0	0	0	0	0	0	0	0	D_0__Bacteria;D_1__Actinobacteria;D_2__Acidimicrobiia
712d7a2bbb261f90a50c42a2286b49ea	0	0	0	0	0	1	0	0	0	0	0	0	2	0	2	0	0	0	0	0	0	0	0	0	3	0	0	3	0	0	0	0	0	0	0	0	D_0__Bacteria;D_1__Bacteroidetes;D_2__Bacteroidia;D_3__Cytophagales;D_4__Spirosomaceae;D_5__Leadbetterella;D_6__uncultured Leadbetterella sp.
af71d73ca45c4a185c69b8b82d7d5c97	0	0	0	0	2	3	2	0	0	0	0	0	0	0	0	0	0	0	0	0	0	0	0	0	0	0	0	0	0	0	0	0	0	0	0	0	D_0__Bacteria;D_1__Gemmatimonadetes;D_2__Gemmatimonadetes;D_3__Gemmatimonadales;D_4__Gemmatimonadaceae;D_5__uncultured;D_6__uncultured proteobacterium
ab0ed6a828cab41e5cadc017e08fb236	0	2	0	0	0	0	2	0	0	2	0	0	4	0	0	2	0	2	2	1	1	0	2	0	2	0	0	2	0	0	0	0	0	1	0	2	D_0__Bacteria;D_1__Actinobacteria;D_2__Actinobacteria;D_3__Propionibacteriales;D_4__Nocardioidaceae;D_5__Nocardioides
cfd235beb4b18aa2a436b592aa233035	0	0	0	0	0	0	0	0	0	0	0	0	1	0	2	0	0	0	2	0	2	4	2	0	0	0	2	3	0	1	0	2	0	0	0	8	D_0__Bacteria;D_1__Proteobacteria;D_2__Gammaproteobacteria;D_3__Betaproteobacteriales;D_4__TRA3-20
3ad4a387c5c3b9e7237503a8d4f5f749	2	0	0	0	0	0	0	0	0	0	0	2	0	0	0	0	0	0	0	0	0	0	0	0	0	0	0	0	0	0	0	0	0	0	2	0	D_0__Bacteria;D_1__Actinobacteria
cfb05a6677409f78e7a656974783717d	2	4	3	0	1	3	2	0	0	0	3	0	2	3	6	21	1	0	3	8	2	4	1	5	2	0	1	12	5	3	0	1	3	9	2	1	D_0__Bacteria;D_1__Proteobacteria;D_2__Gammaproteobacteria;D_3__Xanthomonadales
2362357d8a151ef2626802027701197c	0	1	5	4	2	0	0	1	3	1	1	0	0	0	0	0	0	5	0	0	0	3	0	0	0	1	0	0	0	0	1	1	0	3	0	1	D_0__Bacteria;D_1__Proteobacteria;D_2__Deltaproteobacteria;D_3__Desulfarculales;D_4__Desulfarculaceae;D_5__uncultured
f63aff3787e1b3267d977d476320c9a8	0	0	0	0	0	0	0	0	0	0	0	0	4	0	0	0	0	0	0	0	0	1	0	0	0	0	1	7	0	0	0	0	0	2	0	0	D_0__Bacteria;D_1__Proteobacteria;D_2__Deltaproteobacteria;D_3__Desulfuromonadales;D_4__Geobacteraceae;D_5__Geobacter
176ee1ca1258f47384164651f342be74	0	0	0	0	1	0	0	0	0	3	0	0	1	0	0	0	0	0	2	0	0	0	0	0	0	0	0	0	0	0	0	0	1	0	0	0	D_0__Bacteria;D_1__Acidobacteria;D_2__Subgroup 6
4057ae5798681767695612778eee0886	0	1	2	1	3	3	2	0	0	0	0	0	0	1	1	0	0	2	0	0	2	2	0	2	0	0	3	0	0	3	0	1	0	0	0	0	D_0__Bacteria;D_1__Proteobacteria;D_2__Alphaproteobacteria
ee396504429158f21e4748ba0afe7723	2	0	0	1	0	0	0	0	0	0	0	0	0	1	0	0	2	0	0	2	0	0	0	0	0	0	0	0	1	0	0	0	0	0	0	0	D_0__Bacteria;D_1__Bacteroidetes;D_2__Bacteroidia;D_3__Sphingobacteriales;D_4__env.OPS 17;D_5__uncultured Alistipes sp.;D_6__uncultured Alistipes sp.
aaa9c02246e19ba3507d7feda5496151	0	0	0	0	0	0	1	0	0	0	1	2	0	0	0	0	0	0	0	0	0	0	0	2	0	2	0	0	0	0	0	0	0	0	0	0	D_0__Bacteria;D_1__Proteobacteria;D_2__Deltaproteobacteria;D_3__Oligoflexales;D_4__0319-6G20;D_5__uncultured gamma proteobacterium;D_6__uncultured gamma proteobacterium
0eb914cdbde6f95616927c6b7f1e4a65	0	2	0	1	0	0	0	2	0	1	0	0	6	1	0	0	0	0	0	0	1	0	0	1	0	0	0	0	0	0	0	0	0	1	2	0	D_0__Bacteria;D_1__Verrucomicrobia;D_2__Verrucomicrobiae;D_3__Pedosphaerales;D_4__Pedosphaeraceae;D_5__uncultured Desulfovibrio sp.;D_6__uncultured Desulfovibrio sp.
c6d64a631ea2c1b9aeeb6aa8ef095cf4	1	0	0	0	1	0	0	0	3	0	1	3	0	0	0	0	0	3	1	0	0	0	0	0	0	3	0	0	0	0	3	0	2	3	0	0	D_0__Bacteria;D_1__Actinobacteria;D_2__Thermoleophilia;D_3__Solirubrobacterales;D_4__67-14;D_5__bacterium YC-ZSS-LKJ159;D_6__bacterium YC-ZSS-LKJ159
6f685978cf14f06fb4143be27e8421cf	5	3	11	3	3	5	2	11	5	8	8	3	6	2	2	0	0	5	6	2	14	8	8	0	0	7	5	3	0	1	5	2	5	13	8	4	D_0__Bacteria;D_1__Chloroflexi;D_2__TK10
abb7126d93e7f86d4dcfa2b2daf2496e	0	0	0	0	0	1	0	0	0	0	0	0	0	0	0	0	0	1	0	0	0	2	0	1	1	5	2	0	1	0	0	0	0	0	0	0	D_0__Bacteria;D_1__Actinobacteria;D_2__Actinobacteria;D_3__Micrococcales;D_4__Microbacteriaceae
e16afda38f8e442415eedb147d5f41bf	0	0	0	0	0	0	0	0	2	3	0	0	0	0	0	0	0	0	0	0	0	0	0	0	0	0	0	0	0	0	1	0	0	0	0	0	D_0__Bacteria;D_1__Latescibacteria;D_2__Latescibacteria;D_3__Latescibacterales;D_4__Latescibacteraceae;D_5__metagenome;D_6__metagenome
2209116cb369aeb78451c13efce8e446	0	0	0	0	0	0	0	0	0	0	2	0	2	0	0	0	4	0	4	0	0	0	2	0	0	0	0	2	0	0	0	0	0	1	0	0	D_0__Bacteria;D_1__Proteobacteria;D_2__Deltaproteobacteria;D_3__Myxococcales
9da6333c59660014b9c5d4556d1ec47a	2	0	0	0	0	0	0	2	0	1	1	0	0	0	3	0	0	0	0	0	0	0	0	0	0	0	0	0	0	0	0	0	0	0	0	25	D_0__Bacteria;D_1__Bacteroidetes;D_2__Bacteroidia;D_3__Flavobacteriales;D_4__Weeksellaceae;D_5__Chryseobacterium
38ee5e072782d3bb2508eaec0d43a618	0	0	0	0	0	0	0	0	0	0	0	0	0	0	0	1	0	0	0	0	0	0	0	0	0	0	1	0	2	0	1	0	0	0	0	0	D_0__Bacteria;D_1__Bacteroidetes;D_2__Bacteroidia;D_3__Cytophagales;D_4__Microscillaceae
c75d90d2807c76c0ebd0c265371c3020	0	0	0	0	0	1	0	2	4	0	0	0	3	2	3	0	0	0	0	0	1	0	2	0	4	0	2	0	1	0	0	0	0	0	0	0	D_0__Bacteria;D_1__Proteobacteria;D_2__Alphaproteobacteria;D_3__Sphingomonadales;D_4__Sphingomonadaceae;D_5__Sphingomonas
c7c265abc3006e95013fc82eb51df189	1	0	0	0	0	0	0	0	0	0	0	0	0	0	0	0	0	1	0	0	0	0	0	0	0	2	0	0	0	0	0	0	0	0	0	0	D_0__Bacteria;D_1__Actinobacteria;D_2__Acidimicrobiia;D_3__IMCC26256
904c140905503738b7b48a4b90bb87b0	0	0	0	0	0	0	0	0	0	0	0	0	0	0	0	0	0	0	0	0	0	0	0	1	0	1	0	0	0	0	0	0	0	0	0	0	D_0__Bacteria;D_1__Proteobacteria;D_2__Gammaproteobacteria;D_3__Betaproteobacteriales;D_4__Nitrosomonadaceae;D_5__MND1;D_6__uncultured Methylococcales bacterium
9cf2c5eb9bff56746852ba7bf6afddff	0	0	0	3	0	0	1	0	0	0	0	0	0	0	0	0	0	0	0	0	0	1	0	0	0	0	0	0	0	0	0	0	0	0	0	0	D_0__Bacteria;D_1__Proteobacteria;D_2__Gammaproteobacteria;D_3__CCD24;D_4__uncultured Pseudoxanthomonas sp.;D_5__uncultured Pseudoxanthomonas sp.;D_6__uncultured Pseudoxanthomonas sp.
78194df9d37acf958515ed352dc16f77	0	0	0	0	0	5	0	4	0	0	0	0	0	0	0	2	0	0	0	0	1	0	1	2	0	0	0	0	0	0	0	0	0	0	1	0	D_0__Bacteria;D_1__Acidobacteria;D_2__Subgroup 6
8dca50407abf35139b63debc042abc28	0	1	0	0	0	0	0	3	1	0	1	1	0	0	0	0	0	0	0	0	0	1	0	0	0	0	0	0	0	2	1	0	0	0	0	0	D_0__Bacteria;D_1__Proteobacteria;D_2__Gammaproteobacteria;D_3__Betaproteobacteriales;D_4__Nitrosomonadaceae;D_5__Ellin6067
71a349ba88aec6ffa97ceb5053486022	5	3	2	2	1	7	1	0	1	2	3	3	3	0	1	0	5	0	2	9	2	0	1	0	3	0	8	11	9	5	6	1	8	0	14	5	D_0__Bacteria;D_1__Gemmatimonadetes;D_2__Gemmatimonadetes;D_3__Gemmatimonadales;D_4__Gemmatimonadaceae
9b033e66dcfef9ee29b3d27a5688caa3	3	2	1	5	1	0	3	6	3	0	6	9	0	3	2	0	3	1	0	0	3	1	3	0	0	1	3	1	0	0	6	3	0	2	2	5	D_0__Bacteria;D_1__Proteobacteria;D_2__Gammaproteobacteria;D_3__Betaproteobacteriales;D_4__Burkholderiaceae;D_5__Cupriavidus
42190facac0c78ddc030f2536f5a2c16	0	0	0	0	2	0	2	0	0	0	1	2	0	0	0	0	0	0	0	0	0	0	0	0	0	0	0	0	0	0	0	0	0	0	2	0	D_0__Bacteria;D_1__Bacteroidetes;D_2__Bacteroidia;D_3__Chitinophagales;D_4__Chitinophagaceae
1c1268afbb2b782bbbd5031a86983032	0	0	0	0	0	0	0	0	0	0	0	0	0	0	0	0	0	0	0	0	0	1	0	0	0	0	1	0	0	0	2	0	0	0	0	0	D_0__Bacteria;D_1__Actinobacteria;D_2__Acidimicrobiia;D_3__IMCC26256
35f46ead370884eb78120bc31d9609a6	0	0	0	0	0	0	0	0	0	0	0	0	0	0	0	0	0	0	0	0	0	0	0	0	0	5	0	0	2	1	2	0	0	0	0	0	D_0__Bacteria;D_1__Bacteroidetes;D_2__Bacteroidia;D_3__Flavobacteriales;D_4__Flavobacteriaceae
2ebe8ddb7435bfe70f8a382af8c8b458	5	0	2	0	3	0	0	1	2	2	1	4	1	0	3	0	0	0	1	2	4	0	0	2	0	0	9	4	0	2	3	9	0	4	3	0	D_0__Bacteria;D_1__Proteobacteria;D_2__Gammaproteobacteria;D_3__Pseudomonadales;D_4__Moraxellaceae;D_5__Permianibacter;D_6__uncultured soil bacterium
f6ec4f8f7bc8f94c374d3e59f8cfdd3d	0	0	0	0	0	0	0	0	0	0	0	0	0	0	0	0	0	0	0	0	2	0	0	7	0	0	0	0	0	0	0	0	0	0	0	0	D_0__Bacteria;D_1__Proteobacteria;D_2__Gammaproteobacteria;D_3__Enterobacteriales;D_4__Enterobacteriaceae
1d6e9294b7ce7d7ed96782b76e9f7e20	0	0	0	0	0	1	0	0	0	0	0	0	0	0	0	0	0	0	0	0	6	0	0	0	0	0	0	0	0	0	0	0	0	0	0	0	D_0__Bacteria;D_1__Proteobacteria;D_2__Gammaproteobacteria;D_3__Enterobacteriales;D_4__Enterobacteriaceae
6efaf4ae3df9dec446e12dacbbf68064	0	0	3	1	1	0	0	1	1	0	0	2	0	2	0	3	3	2	2	0	2	1	1	6	1	3	1	3	2	4	1	1	1	0	0	0	D_0__Bacteria;D_1__Acidobacteria;D_2__Subgroup 6
150a0c5b1936cc5e9283b1c47606b905	0	0	0	2	0	2	0	2	0	0	0	0	1	2	0	0	2	0	0	0	1	0	3	0	0	1	2	5	0	2	0	0	2	0	0	0	D_0__Bacteria;D_1__Proteobacteria;D_2__Deltaproteobacteria;D_3__Myxococcales;D_4__Haliangiaceae;D_5__Haliangium;D_6__myxobacterium AT3-03
0c51a1727d87c6da9ebadf93700394f3	4	0	1	1	0	10	2	6	7	4	4	7	1	2	1	0	0	1	0	1	0	0	0	1	2	1	3	0	0	6	4	2	1	6	5	1	D_0__Bacteria;D_1__Actinobacteria;D_2__Actinobacteria;D_3__Propionibacteriales;D_4__Nocardioidaceae;D_5__Kribbella
c4dab2c78260557e20502ee766453f66	0	0	0	0	0	0	0	0	0	0	0	0	4	0	0	3	0	0	0	0	0	0	0	0	1	0	0	0	0	0	0	0	0	0	0	0	D_0__Bacteria;D_1__Patescibacteria;D_2__Saccharimonadia;D_3__Saccharimonadales;D_4__uncultured Epsilonproteobacteria bacterium;D_5__uncultured Epsilonproteobacteria bacterium;D_6__uncultured Epsilonproteobacteria bacterium
ea5341aecc0a557ea6c62420781ae2e2	0	0	0	0	1	1	0	0	0	0	0	0	0	1	0	0	0	0	0	0	0	0	0	0	0	0	0	0	0	0	0	0	0	0	0	2	D_0__Bacteria;D_1__Proteobacteria;D_2__Gammaproteobacteria;D_3__Betaproteobacteriales;D_4__Nitrosomonadaceae;D_5__mle1-7;D_6__uncultured Rhodocyclaceae bacterium
cc9d38b431033f35eca6ae855b8d4fb8	8	9	13	3	0	14	7	15	3	0	11	4	2	5	3	0	16	7	16	0	11	16	4	6	1	2	0	0	1	0	6	1	1	3	1	0	D_0__Bacteria;D_1__Proteobacteria;D_2__Alphaproteobacteria
559adcb55fc654b09c3b03e0b61abf76	0	2	0	0	0	0	0	0	0	0	0	0	0	0	2	0	0	0	3	0	2	0	0	0	0	0	0	0	0	0	0	0	0	0	0	0	D_0__Bacteria;D_1__Chloroflexi;D_2__KD4-96;D_3__bacterium Ellin6529;D_4__bacterium Ellin6529;D_5__bacterium Ellin6529;D_6__bacterium Ellin6529
99f1f3bb5951d4f61c5b2f1f9de0023e	6	3	11	2	2	6	1	2	8	2	2	1	0	3	0	3	4	4	1	1	0	11	6	2	3	3	8	4	1	1	5	4	4	0	2	3	D_0__Bacteria;D_1__Proteobacteria;D_2__Deltaproteobacteria;D_3__Myxococcales;D_4__Haliangiaceae;D_5__Haliangium
1c4d651e7e95e506ab8cedfe9fb686e8	7	0	0	0	0	0	8	3	2	0	0	1	0	0	0	0	0	2	0	0	0	0	0	0	0	0	0	0	0	0	0	0	4	0	0	3	D_0__Bacteria;D_1__Proteobacteria;D_2__Gammaproteobacteria;D_3__Betaproteobacteriales;D_4__Nitrosomonadaceae;D_5__Ellin6067
cfc2cc7cad63d39f7e11820c5c16956d	0	0	0	0	0	0	0	0	0	0	0	0	0	0	2	0	0	0	1	2	0	0	0	1	0	0	0	0	0	1	0	0	0	0	0	0	D_0__Bacteria;D_1__Gemmatimonadetes;D_2__Gemmatimonadetes;D_3__Gemmatimonadales;D_4__Gemmatimonadaceae;D_5__uncultured
453add63ee52684416c0c1163618a52d	0	0	0	0	0	0	0	0	0	0	0	0	2	0	0	2	0	2	0	1	0	0	0	0	0	1	0	4	0	1	0	0	0	2	0	0	D_0__Bacteria;D_1__Proteobacteria;D_2__Gammaproteobacteria;D_3__Xanthomonadales;D_4__Rhodanobacteraceae;D_5__Rhodanobacter
7eeb2ad1674817a497a52dfa82fb45f0	0	1	1	0	0	0	0	0	0	0	0	0	0	0	0	0	0	0	0	0	0	0	0	0	0	0	0	0	0	0	2	1	1	0	0	0	D_0__Bacteria;D_1__Verrucomicrobia;D_2__Verrucomicrobiae
3504f0c385e5119faf5eced0c7b60a30	3	5	1	3	2	5	0	1	2	1	2	1	0	0	5	3	2	2	5	5	1	2	4	0	5	2	2	5	1	0	1	0	6	7	1	1	D_0__Bacteria;D_1__Proteobacteria;D_2__Alphaproteobacteria;D_3__Rhizobiales;D_4__Methyloligellaceae;D_5__uncultured
5a90f22930be9eff80f3a59535d3fad3	2	2	0	0	0	0	0	0	0	0	1	1	1	0	0	0	2	0	1	0	0	3	0	1	0	0	0	0	0	0	5	3	5	3	2	3	D_0__Bacteria;D_1__Proteobacteria;D_2__Alphaproteobacteria;D_3__Sphingomonadales;D_4__Sphingomonadaceae;D_5__Sphingomonas
1165fa91f87dc4d819d47a0c054c04a4	9	0	7	4	0	5	1	10	2	0	15	4	2	0	0	0	0	2	0	0	0	1	0	0	0	0	2	0	1	0	10	2	1	3	8	3	D_0__Bacteria;D_1__Proteobacteria;D_2__Gammaproteobacteria;D_3__Betaproteobacteriales;D_4__Burkholderiaceae
961826b2b1ba1220097c6de619473972	0	0	0	0	0	0	0	8	1	0	0	0	0	0	1	0	0	0	0	0	0	0	0	0	0	0	0	0	0	0	0	0	0	4	0	0	D_0__Bacteria;D_1__Acidobacteria;D_2__Acidobacteriia;D_3__Solibacterales;D_4__Solibacteraceae (Subgroup 3);D_5__Candidatus Solibacter;D_6__bacterium Ellin7504
36ed64931aa8bb7b9b3cf812ee4a690e	4	10	7	8	3	2	7	15	2	5	12	7	4	1	0	0	0	10	0	0	2	2	2	0	0	1	3	4	2	0	10	8	2	6	2	5	D_0__Bacteria;D_1__Acidobacteria;D_2__Acidobacteriia;D_3__Solibacterales;D_4__Solibacteraceae (Subgroup 3);D_5__Candidatus Solibacter;D_6__bacterium Ellin6505
92292f5987e2255bfeab6b0cd8a22fec	0	1	0	0	0	0	0	0	0	0	0	1	0	0	0	0	0	0	0	0	0	0	0	0	0	0	0	0	0	0	0	0	0	0	1	0	D_0__Bacteria;D_1__Bacteroidetes;D_2__Bacteroidia;D_3__Cytophagales;D_4__Microscillaceae
db258d0ded9ad5aec0c3b666a428f3f7	0	0	0	0	0	0	2	0	0	0	0	0	0	0	0	0	0	0	0	0	0	0	0	1	0	0	0	0	0	0	0	0	0	0	0	0	D_0__Bacteria;D_1__Bacteroidetes;D_2__Bacteroidia;D_3__Sphingobacteriales;D_4__env.OPS 17;D_5__uncultured Alistipes sp.;D_6__uncultured Alistipes sp.
6b7c316c5b52079690c77e3ce62c0b58	0	0	0	0	0	0	0	0	0	0	0	0	1	0	0	0	0	0	0	1	0	0	0	0	2	0	0	0	0	0	0	0	0	1	0	0	D_0__Bacteria;D_1__Chloroflexi;D_2__Anaerolineae;D_3__SBR1031;D_4__A4b;D_5__uncultured bacterium;D_6__uncultured bacterium
7d61e29c9a7edc266fb3dbd7f702f942	0	2	3	0	3	2	4	4	8	3	5	4	0	0	0	0	5	1	10	9	0	0	0	3	4	3	6	4	5	0	3	1	3	6	9	0	D_0__Bacteria;D_1__Proteobacteria;D_2__Alphaproteobacteria;D_3__Rhodospirillales;D_4__Rhodopirillaceae;D_5__Defluviicoccus
1813c0c405f0e2a5b1a692268e3f4529	8	6	8	8	5	4	1	4	9	17	10	9	2	4	5	0	2	8	1	3	1	5	3	0	2	1	3	3	0	5	22	19	16	26	31	20	D_0__Bacteria;D_1__Proteobacteria;D_2__Gammaproteobacteria;D_3__Betaproteobacteriales;D_4__SC-I-84
cbdeb5db2f03d1cc3ed3bfd1f91ea295	0	0	0	0	0	0	0	0	0	0	0	0	0	0	0	0	0	0	0	0	0	0	5	0	0	0	0	0	0	0	0	0	0	0	4	0	D_0__Bacteria;D_1__Proteobacteria;D_2__Gammaproteobacteria;D_3__Pseudomonadales;D_4__Pseudomonadaceae;D_5__Pseudomonas
1633312bb52d609f8412809a97e7557e	0	0	0	0	0	0	0	0	0	0	2	0	0	0	0	0	0	0	0	1	0	0	0	0	0	0	0	0	0	0	0	1	1	0	0	0	D_0__Bacteria;D_1__Proteobacteria;D_2__Gammaproteobacteria;D_3__Betaproteobacteriales;D_4__Nitrosomonadaceae;D_5__mle1-7;D_6__uncultured Burkholderiales bacterium
3ff6c64f6a8cc75e10149724bd58621d	0	0	0	0	0	0	0	0	2	0	0	0	0	0	2	4	0	2	0	0	2	0	3	0	3	2	0	0	5	2	0	0	0	0	0	2	D_0__Bacteria;D_1__Actinobacteria;D_2__Actinobacteria;D_3__Corynebacteriales;D_4__Dietziaceae;D_5__Dietzia
a529be7062c3462cc117665d5badaff6	0	0	0	0	0	0	0	0	0	0	0	0	0	0	0	0	2	0	0	0	0	0	0	0	0	0	0	0	0	0	0	1	0	1	0	0	D_0__Bacteria;D_1__Proteobacteria;D_2__Deltaproteobacteria;D_3__NB1-j;D_4__uncultured proteobacterium;D_5__uncultured proteobacterium;D_6__uncultured proteobacterium
f12517d547d6bab1d54ee70dec83e249	1	0	0	0	0	1	0	0	0	0	0	0	0	3	0	0	0	3	0	1	0	0	0	0	0	4	0	0	2	0	0	0	0	4	1	0	D_0__Bacteria;D_1__Actinobacteria;D_2__Thermoleophilia;D_3__Gaiellales;D_4__Gaiellaceae;D_5__Gaiella;D_6__actinobacterium WWH12
0c84f70ee332d7452c3491d8e9bd53ec	2	0	0	1	0	0	1	0	0	0	0	0	0	0	0	0	0	0	0	0	0	0	0	0	0	0	0	0	0	0	0	0	1	0	0	0	D_0__Bacteria;D_1__Proteobacteria;D_2__Gammaproteobacteria
dbe550a6bca6ca6627b8819bf8fb6e65	0	0	0	0	0	0	1	0	0	5	2	0	0	0	0	0	0	0	1	0	0	2	0	0	1	0	0	0	0	0	0	1	3	0	0	0	D_0__Bacteria;D_1__Bacteroidetes;D_2__Bacteroidia;D_3__Sphingobacteriales;D_4__env.OPS 17;D_5__uncultured Alistipes sp.;D_6__uncultured Alistipes sp.
5d4fe3ea0d4994e425385b73e1c7fd1e	2	1	0	1	0	2	0	0	0	0	0	0	0	0	1	2	0	0	0	2	0	0	0	0	0	0	0	0	0	0	0	2	3	0	0	0	D_0__Bacteria;D_1__Acidobacteria;D_2__Blastocatellia (Subgroup 4);D_3__11-24;D_4__uncultivated soil bacterium clone S111;D_5__uncultivated soil bacterium clone S111;D_6__uncultivated soil bacterium clone S111
9f70092223d9a39a9bfa76a87592de4a	1	2	0	0	0	0	1	1	4	0	4	0	3	0	0	4	0	3	0	0	1	1	0	0	6	2	1	3	4	6	1	3	8	2	1	2	D_0__Bacteria;D_1__Chloroflexi;D_2__Ktedonobacteria;D_3__Ktedonobacterales;D_4__JG30-KF-AS9;D_5__uncultured soil bacterium;D_6__uncultured soil bacterium
186c2c55699e2cb703e30de7fdf4aaa3	0	0	0	0	0	0	0	0	0	0	0	0	0	0	0	0	0	0	0	0	0	1	0	0	0	0	2	0	2	0	0	2	0	0	0	0	D_0__Bacteria;D_1__Verrucomicrobia;D_2__Verrucomicrobiae;D_3__Pedosphaerales;D_4__Pedosphaeraceae
63e3b026ca157a391d97be32ab813406	0	0	0	0	1	0	0	1	1	0	1	0	0	2	0	0	0	0	0	0	0	0	0	0	0	0	0	0	0	0	0	0	3	0	0	0	D_0__Bacteria;D_1__Proteobacteria;D_2__Alphaproteobacteria;D_3__Rhizobiales;D_4__Xanthobacteraceae;D_5__Pseudolabrys;D_6__Pseudolabrys sp. Root1462
41b3e25194205ed10a3760cd8f593596	0	0	0	0	0	0	0	0	0	0	0	0	4	0	2	1	0	0	0	2	2	2	2	0	0	0	2	0	0	0	0	0	0	0	0	0	D_0__Bacteria;D_1__Proteobacteria;D_2__Gammaproteobacteria;D_3__Betaproteobacteriales;D_4__Nitrosomonadaceae;D_5__Ellin6067
806c02aa275fd05316cc42664dbecd55	2	2	0	0	0	0	2	0	0	1	2	0	2	0	3	1	2	1	2	14	0	2	5	0	1	0	3	12	1	2	4	0	3	2	4	1	D_0__Bacteria;D_1__Actinobacteria;D_2__Acidimicrobiia;D_3__Microtrichales;D_4__Iamiaceae;D_5__Iamia;D_6__uncultured Iamiaceae bacterium
c9bad6e34a66a6b1e8c55c12b6fed87a	0	0	3	0	0	0	0	0	0	0	3	2	0	0	0	0	0	1	0	0	0	0	0	0	0	0	0	0	0	0	0	0	0	0	0	1	D_0__Bacteria;D_1__Proteobacteria;D_2__Deltaproteobacteria;D_3__Myxococcales
e6976e316d69c0bd772d909d1f699a31	0	3	1	1	1	4	3	2	0	2	0	2	2	9	4	4	0	0	9	2	4	6	7	3	3	4	4	9	1	8	0	0	2	2	1	2	D_0__Bacteria;D_1__Actinobacteria;D_2__Actinobacteria;D_3__Propionibacteriales;D_4__Nocardioidaceae
3c4a2a31124e7efb81eb8a91286fd08f	2	0	0	0	0	0	0	0	0	0	0	0	0	7	2	0	0	3	0	3	5	1	9	0	4	1	0	0	1	2	2	0	0	0	3	0	D_0__Bacteria;D_1__Proteobacteria;D_2__Alphaproteobacteria;D_3__Sphingomonadales;D_4__Sphingomonadaceae;D_5__Sphingomonas
e48a3ae9c1dc5806cf6eae1881de82ae	0	0	0	0	0	0	0	0	0	0	0	0	0	0	0	3	0	0	0	1	0	0	0	0	0	0	0	0	0	0	0	0	0	0	0	0	D_0__Bacteria;D_1__Firmicutes;D_2__Bacilli;D_3__Bacillales;D_4__Bacillaceae;D_5__Fictibacillus
3f15ee323b70bc9ffc7ac477d3e8ac31	2	0	0	1	2	0	0	0	0	0	0	0	0	0	0	0	0	0	0	0	0	1	0	0	0	0	0	0	0	1	0	0	0	1	2	2	D_0__Bacteria;D_1__Acidobacteria;D_2__Subgroup 6
274f1f729fa334cdb583f2dcfd58e887	0	3	5	5	0	2	0	1	0	2	3	2	0	0	0	0	0	0	0	0	0	1	0	0	0	0	0	0	1	0	2	2	3	1	2	1	D_0__Bacteria;D_1__Proteobacteria;D_2__Gammaproteobacteria;D_3__Betaproteobacteriales;D_4__Nitrosomonadaceae;D_5__MND1
be24698bc98cdd4ed2bfcbd764156a0c	2	0	0	0	0	0	3	0	0	0	0	0	0	0	0	0	0	0	0	2	0	0	0	0	0	0	0	0	0	0	0	0	0	0	0	0	D_0__Bacteria;D_1__Proteobacteria;D_2__Gammaproteobacteria;D_3__Oceanospirillales;D_4__Pseudohongiellaceae;D_5__BIyi10;D_6__uncultured soil bacterium
c762652d871e89de879f4d3446dcba85	2	0	0	3	1	0	0	0	0	0	0	0	0	0	0	0	0	0	0	0	0	2	0	0	0	0	0	0	0	0	0	0	0	0	0	0	D_0__Bacteria;D_1__Acidobacteria;D_2__Acidobacteriia;D_3__Subgroup 2
c22ba91c405bbbfad395417edaf158e9	0	2	0	0	1	1	0	0	2	1	0	0	0	0	0	2	0	0	0	0	0	0	0	0	3	0	0	2	0	2	1	0	0	0	0	0	D_0__Bacteria;D_1__Proteobacteria;D_2__Alphaproteobacteria;D_3__Rhizobiales;D_4__Xanthobacteraceae
257789b63e34606e4bcd6cb669ee7c39	0	0	1	5	0	0	0	0	1	4	0	7	0	0	4	0	0	2	0	0	0	0	0	0	0	2	0	2	0	0	0	0	0	0	0	9	D_0__Bacteria;D_1__Proteobacteria;D_2__Gammaproteobacteria;D_3__Ectothiorhodospirales;D_4__Ectothiorhodospiraceae
8c34f249604dcf0aaa6bdfbe80a12045	0	0	1	1	0	0	0	0	0	0	0	0	0	0	0	0	0	0	0	0	2	3	0	0	0	0	0	0	0	0	0	4	1	0	3	0	D_0__Bacteria;D_1__Acidobacteria;D_2__Thermoanaerobaculia;D_3__Thermoanaerobaculales;D_4__Thermoanaerobaculaceae;D_5__Subgroup 10
d72a980ae6663d5a9818d409e079d80d	0	0	0	2	0	0	0	0	0	0	0	0	4	0	0	0	0	3	8	0	1	0	1	0	0	2	0	0	0	5	0	0	0	1	0	1	D_0__Bacteria;D_1__Gemmatimonadetes;D_2__Gemmatimonadetes;D_3__Gemmatimonadales;D_4__Gemmatimonadaceae
d984d3dc4a50c89ec8e2ecb00838bc39	3	0	9	2	2	4	0	0	0	2	0	1	0	3	0	2	3	6	0	1	3	2	0	0	1	2	0	0	4	0	3	3	0	2	4	2	D_0__Bacteria;D_1__Bacteroidetes;D_2__Bacteroidia;D_3__Cytophagales;D_4__Microscillaceae;D_5__uncultured
05c3eaea813f105f3fb10e4c86f9bd55	0	0	0	0	2	0	0	0	0	0	0	0	1	1	0	0	0	1	0	0	0	0	0	0	0	0	0	3	2	0	0	0	0	0	0	0	D_0__Bacteria;D_1__Proteobacteria;D_2__Gammaproteobacteria;D_3__KI89A clade;D_4__uncultured organism;D_5__uncultured organism;D_6__uncultured organism
f661e8a28461a817663b662c3d58f31e	3	0	0	1	2	4	3	0	0	2	4	0	0	0	1	0	0	1	1	4	1	2	2	0	1	0	1	0	2	2	2	0	2	0	0	0	D_0__Bacteria;D_1__Actinobacteria;D_2__Acidimicrobiia;D_3__Microtrichales;D_4__Iamiaceae;D_5__Iamia
b5ae73ab09d2750a65e4368e994ca7b1	0	1	0	0	0	1	1	4	1	4	1	4	2	0	2	0	0	0	1	0	0	3	0	0	3	0	1	0	0	0	1	1	3	1	1	3	D_0__Bacteria;D_1__Gemmatimonadetes;D_2__Gemmatimonadetes;D_3__Gemmatimonadales;D_4__Gemmatimonadaceae;D_5__Gemmatimonas;D_6__Gemmatimonadetes bacterium Ellin7146
e5d2322bbcf738ec1de3720768db72ef	0	0	1	0	0	2	0	1	0	1	2	1	0	1	0	0	0	1	3	0	0	0	0	0	0	0	0	0	0	2	0	2	0	0	0	0	D_0__Bacteria;D_1__Proteobacteria;D_2__Alphaproteobacteria
a7cd3a5aa64a0ce41ed49f3bf3190181	2	2	0	0	1	0	0	0	0	0	0	0	0	0	0	0	0	0	0	0	0	0	0	0	0	0	0	0	0	0	0	0	0	0	0	0	D_0__Archaea;D_1__Thaumarchaeota;D_2__Group 1.1c;D_3__uncultured crenarchaeote;D_4__uncultured crenarchaeote;D_5__uncultured crenarchaeote;D_6__uncultured crenarchaeote
4e6314f3376fe60a09cace2eedc75e82	0	0	0	0	0	0	0	0	0	0	0	0	0	0	0	0	0	0	0	0	0	0	0	0	2	0	1	0	3	1	0	0	0	0	0	0	D_0__Bacteria;D_1__Proteobacteria;D_2__Alphaproteobacteria;D_3__Rhizobiales;D_4__Rhizobiales Incertae Sedis;D_5__Bauldia;D_6__uncultured Phyllobacteriaceae bacterium
889a1ef0a00abb261541290a5f1bafdf	0	0	2	0	0	0	0	0	0	0	0	0	0	0	0	0	0	2	0	0	0	0	0	0	0	1	0	4	0	0	0	0	0	0	0	0	D_0__Bacteria;D_1__Proteobacteria;D_2__Alphaproteobacteria;D_3__Elsterales;D_4__uncultured
604381af3fa50f3b4ca9eebf14f12163	0	0	0	0	0	0	0	0	0	0	0	0	0	0	0	0	0	0	0	1	0	0	2	0	0	0	0	0	0	0	0	0	0	0	0	0	D_0__Bacteria;D_1__Acidobacteria;D_2__Acidobacteriia;D_3__Solibacterales;D_4__Solibacteraceae (Subgroup 3);D_5__Candidatus Solibacter
e907362a06cd67ba5f83f0f84dfa04d0	0	0	0	1	0	0	0	0	0	0	0	0	0	0	0	0	0	0	0	0	0	0	0	0	0	0	0	0	0	0	0	0	2	0	0	0	D_0__Bacteria;D_1__Proteobacteria;D_2__Deltaproteobacteria;D_3__Myxococcales;D_4__Archangiaceae;D_5__Anaeromyxobacter
1b558453f6079ccedd026e13085bb2d2	2	5	3	7	3	0	8	4	8	7	2	9	0	0	3	1	3	0	4	0	0	2	0	0	0	2	0	3	0	2	5	5	1	5	1	2	D_0__Bacteria;D_1__Proteobacteria;D_2__Gammaproteobacteria;D_3__Betaproteobacteriales
c418466e290bd7bed9ca4fc26355b66e	0	0	2	0	0	0	0	0	0	0	0	0	0	2	0	0	0	0	0	0	0	1	0	0	0	0	0	0	0	0	0	0	0	2	0	0	D_0__Bacteria;D_1__Proteobacteria;D_2__Gammaproteobacteria;D_3__JG36-GS-52;D_4__uncultured soil bacterium;D_5__uncultured soil bacterium;D_6__uncultured soil bacterium
e839410c30550df4b11659541bb8aed3	0	0	0	0	0	0	0	0	0	0	0	0	0	0	0	0	0	0	0	2	0	0	0	0	3	0	0	2	5	2	0	0	0	0	0	0	D_0__Bacteria;D_1__Proteobacteria;D_2__Alphaproteobacteria;D_3__Caulobacterales;D_4__Caulobacteraceae;D_5__uncultured
5ab9032a4dd45b09c1ebe7d98dcfc4fd	0	2	0	0	0	3	0	0	0	0	0	0	0	0	0	0	0	0	0	0	0	0	0	0	0	0	0	0	0	0	0	0	0	0	0	0	D_0__Bacteria;D_1__Rokubacteria;D_2__NC10;D_3__Rokubacteriales
9bfb2746c1ca9589e57523117580c850	1	2	0	2	0	1	1	0	0	3	0	2	0	0	0	0	0	0	0	0	0	0	1	0	0	0	0	5	0	0	0	2	0	0	2	0	D_0__Bacteria;D_1__Latescibacteria
663e9c9ac85ebf2596099f43965603e2	1	1	0	0	0	3	0	2	0	0	0	0	0	0	0	0	0	0	0	0	0	0	0	0	0	0	0	0	0	0	0	1	2	0	0	0	D_0__Bacteria;D_1__Proteobacteria;D_2__Deltaproteobacteria;D_3__Myxococcales;D_4__Phaselicystidaceae;D_5__Phaselicystis;D_6__myxobacterium AT1-01
910d40fb61038ee27d71e6b4658996ab	0	0	0	0	0	0	0	0	0	0	0	0	0	0	1	0	2	0	1	0	0	0	1	0	0	0	0	0	0	0	0	0	0	1	0	0	D_0__Bacteria;D_1__Actinobacteria;D_2__Acidimicrobiia;D_3__Microtrichales;D_4__metagenome;D_5__metagenome;D_6__metagenome
2e7ab31ef8275a813d6af9a475f8e0aa	1	0	0	0	0	0	0	0	0	0	0	0	0	0	2	0	0	0	0	0	0	0	0	0	0	0	0	0	0	0	0	0	0	0	0	0	D_0__Bacteria;D_1__Chloroflexi;D_2__Chloroflexia;D_3__Thermomicrobiales;D_4__AKYG1722;D_5__uncultured soil bacterium;D_6__uncultured soil bacterium
3f9cbf9921f04dbefb1f71f4ba590cbe	0	0	0	0	0	0	0	1	0	0	0	1	3	0	0	0	0	0	0	0	0	1	0	0	0	0	0	0	0	0	0	0	0	3	1	0	D_0__Bacteria;D_1__Proteobacteria;D_2__Deltaproteobacteria;D_3__Myxococcales;D_4__Haliangiaceae;D_5__Haliangium
945c65cfe08016cbbdb219bc38c7d824	3	1	4	0	1	0	0	1	0	1	2	0	3	0	2	0	0	2	2	0	0	2	4	0	0	1	1	4	0	0	2	3	3	5	1	4	D_0__Bacteria;D_1__Chloroflexi;D_2__Dehalococcoidia;D_3__S085;D_4__uncultured bacterium 5G4;D_5__uncultured bacterium 5G4;D_6__uncultured bacterium 5G4
dba40b895a91ee7a63eb0abc12b42753	0	0	0	0	0	0	0	0	0	0	0	0	2	0	2	3	0	0	0	0	0	0	0	0	0	0	0	0	0	0	0	0	0	0	0	0	D_0__Bacteria;D_1__Proteobacteria;D_2__Alphaproteobacteria;D_3__Caulobacterales;D_4__Caulobacteraceae
6e882b7a56c155e7f526ebce8feebab1	0	0	1	0	0	0	0	0	0	1	0	0	14	1	2	1	2	3	4	0	3	4	0	2	1	5	0	1	0	2	0	0	0	0	0	0	D_0__Bacteria;D_1__Proteobacteria;D_2__Gammaproteobacteria;D_3__Betaproteobacteriales;D_4__Burkholderiaceae
ef7c2555b86bc0396a43f92b1c9cd561	2	2	1	1	2	0	1	0	0	0	0	0	1	4	0	0	0	1	0	0	0	0	2	0	0	4	0	0	1	1	2	0	2	0	0	3	D_0__Bacteria;D_1__Gemmatimonadetes;D_2__Gemmatimonadetes;D_3__Gemmatimonadales;D_4__Gemmatimonadaceae
f0e94f5beb2268256f75825196274491	1	1	0	0	4	0	0	1	3	0	2	0	0	0	0	0	0	0	0	0	0	0	0	0	0	0	0	0	0	0	0	0	0	0	0	0	D_0__Bacteria;D_1__Actinobacteria;D_2__Acidimicrobiia;D_3__IMCC26256;D_4__actinobacterium BGR 88;D_5__actinobacterium BGR 88;D_6__actinobacterium BGR 88
44e0ed87c63ab601d96080cbaf85c852	0	0	0	0	0	0	0	0	3	2	0	0	0	0	0	1	0	0	0	0	0	0	0	0	0	0	0	0	0	0	0	0	0	0	4	0	D_0__Bacteria;D_1__Proteobacteria;D_2__Deltaproteobacteria;D_3__Bdellovibrionales;D_4__Bdellovibrionaceae;D_5__Bdellovibrio;D_6__Bdellovibrio bacteriovorus W
d47b4d2919b1ecb5a96267a2eb9edfec	0	0	0	1	0	0	1	0	3	2	0	0	5	0	5	2	6	0	0	1	0	1	0	2	4	0	0	0	0	0	0	0	0	0	0	2	D_0__Bacteria;D_1__Proteobacteria;D_2__Alphaproteobacteria
619b2b2653db483111a295f69a11ddd9	0	0	0	0	0	0	0	0	0	0	0	0	0	3	0	0	0	0	0	0	1	0	0	0	0	0	0	0	1	0	0	0	0	0	2	0	D_0__Bacteria
8302a00a3519200666cef73dbee33fdb	0	0	0	0	0	0	0	0	0	0	0	0	0	3	0	1	6	0	0	7	2	9	7	0	0	0	0	0	2	0	0	0	0	0	0	2	D_0__Bacteria;D_1__Bacteroidetes;D_2__Bacteroidia;D_3__Cytophagales;D_4__Hymenobacteraceae;D_5__Adhaeribacter;D_6__Adhaeribacter terreus
fb45f0e53598093d98a5242848dd56bd	0	1	0	0	0	0	0	0	1	0	0	0	0	0	0	1	0	2	1	2	0	0	0	0	0	0	0	0	0	0	0	0	0	0	0	0	D_0__Bacteria;D_1__Verrucomicrobia;D_2__Verrucomicrobiae;D_3__Chthoniobacterales;D_4__Chthoniobacteraceae;D_5__Candidatus Udaeobacter
83d381d12da374bf0f0a14323d0bc399	0	0	0	0	0	0	0	0	0	0	0	0	7	0	2	0	0	0	0	0	0	0	0	0	1	0	1	0	0	0	0	0	0	0	0	0	D_0__Bacteria;D_1__Bacteroidetes;D_2__Bacteroidia;D_3__Chitinophagales;D_4__Chitinophagaceae;D_5__Flavihumibacter;D_6__Flavihumibacter solisilvae
ba6deba93157fa3d8a9152d68f6174cd	0	0	0	0	0	0	0	0	0	0	0	0	0	0	2	0	2	2	0	0	0	0	0	4	0	0	0	1	0	4	0	0	0	0	0	0	D_0__Bacteria;D_1__Acidobacteria;D_2__Acidobacteriia;D_3__Solibacterales;D_4__Solibacteraceae (Subgroup 3);D_5__Candidatus Solibacter
42a14542bffea9f0937886bc20e39705	0	1	0	0	2	0	0	0	0	0	0	0	1	0	8	4	0	0	0	3	0	1	0	2	0	0	1	0	0	2	0	0	0	0	0	0	D_0__Bacteria;D_1__Acidobacteria;D_2__Acidobacteriia;D_3__Solibacterales;D_4__Solibacteraceae (Subgroup 3);D_5__Candidatus Solibacter;D_6__bacterium Ellin6505
a9d283e91f950ca3134535120d7d0b22	0	0	0	0	0	0	0	0	0	0	0	0	0	0	0	0	0	0	0	0	1	0	0	0	1	1	1	0	0	2	0	0	0	0	0	0	D_0__Bacteria;D_1__Bacteroidetes;D_2__Bacteroidia;D_3__Chitinophagales;D_4__Chitinophagaceae
d27ef1fdf132751f7af7365fa08b4102	0	0	2	0	2	0	6	0	0	4	1	0	0	0	1	0	0	0	0	0	0	0	2	0	1	0	0	0	0	0	0	0	0	0	0	0	D_0__Bacteria;D_1__Proteobacteria;D_2__Alphaproteobacteria;D_3__Rhizobiales;D_4__Xanthobacteraceae;D_5__Bradyrhizobium
a3475d88df9ef0c59f70d2679ac09cf9	2	0	0	0	0	0	3	3	0	0	1	0	0	0	0	0	0	0	0	4	0	1	0	0	0	0	0	0	0	0	0	0	0	0	0	1	D_0__Bacteria;D_1__Proteobacteria;D_2__Gammaproteobacteria;D_3__Betaproteobacteriales;D_4__Nitrosomonadaceae;D_5__MND1
2941903af22518f76b6c65ebf36cd69b	0	0	0	1	0	4	0	3	0	0	0	0	0	0	0	0	0	0	0	1	0	1	0	0	0	0	0	0	3	0	3	0	2	1	0	2	D_0__Bacteria
d4b7fe15b731c6b3d8d7c74c36e92ae6	0	0	0	0	0	2	0	0	0	2	0	3	0	0	0	0	2	1	0	0	0	0	2	0	0	0	0	0	0	0	0	0	0	0	0	0	D_0__Bacteria;D_1__Latescibacteria;D_2__Latescibacteria;D_3__Latescibacterales;D_4__Latescibacteraceae;D_5__metagenome;D_6__metagenome
2c45502c705da76eaefd376dd78d0cf7	0	0	2	0	0	0	0	3	0	0	5	0	0	0	0	0	0	0	0	0	0	0	0	0	0	0	0	0	0	0	0	0	0	0	0	0	D_0__Bacteria;D_1__Proteobacteria;D_2__Alphaproteobacteria;D_3__Sphingomonadales;D_4__Sphingomonadaceae;D_5__Sphingomonas
c65c9d440dfdbd3e78be0db3a72d0722	4	3	2	2	5	1	0	1	1	3	0	3	0	0	0	0	0	0	0	0	0	0	0	0	0	0	0	0	0	0	0	0	1	0	1	2	D_0__Bacteria;D_1__Proteobacteria;D_2__Alphaproteobacteria
dd1ad04b61a0550355606badbc38d3eb	0	0	0	0	0	0	0	5	2	0	2	1	0	0	0	0	0	2	0	0	0	0	0	0	0	0	0	0	0	0	1	0	0	1	0	0	D_0__Bacteria;D_1__Acidobacteria;D_2__Acidobacteriia;D_3__Solibacterales;D_4__Solibacteraceae (Subgroup 3);D_5__Bryobacter
b681ec0885f05561a46a23a8129eaa20	2	0	0	0	0	2	0	2	0	0	1	0	0	3	0	0	0	1	3	1	0	0	0	0	2	0	4	0	0	0	3	0	0	1	0	2	D_0__Bacteria;D_1__Acidobacteria;D_2__Subgroup 6;D_3__uncultured bacterium mle1-25;D_4__uncultured bacterium mle1-25;D_5__uncultured bacterium mle1-25;D_6__uncultured bacterium mle1-25
173bdd544d83867193d62897ff615de1	2	0	0	0	0	0	0	0	0	0	0	0	0	0	0	0	0	0	0	0	0	0	0	0	2	0	0	0	1	0	0	0	0	0	0	0	D_0__Bacteria;D_1__Proteobacteria;D_2__Alphaproteobacteria;D_3__Sphingomonadales;D_4__Sphingomonadaceae;D_5__Altererythrobacter
4a479485c67be26f91b4c45801a8da8f	0	1	0	0	0	0	0	0	0	0	0	0	0	0	0	0	0	0	0	2	0	0	0	1	0	0	0	2	0	1	0	0	0	3	0	0	D_0__Bacteria;D_1__Proteobacteria;D_2__Gammaproteobacteria;D_3__Betaproteobacteriales;D_4__Nitrosomonadaceae;D_5__mle1-7;D_6__metagenome
8bbea8a7b436a3c3579036f97748f8b8	1	2	11	2	3	42	14	0	0	5	52	3	5	5	2	0	1	31	19	7	7	3	9	6	6	41	2	2	3	0	20	9	12	13	4	8	D_0__Bacteria;D_1__Gemmatimonadetes;D_2__Gemmatimonadetes;D_3__Gemmatimonadales;D_4__Gemmatimonadaceae;D_5__uncultured;D_6__Gemmatimonadetes bacterium LP81
ea965ef80aee8fcd42e5153ac9def76a	0	0	0	0	0	0	0	0	0	0	2	0	0	1	0	0	0	0	0	0	0	0	0	0	0	0	0	0	0	0	0	0	0	1	3	0	D_0__Bacteria;D_1__Firmicutes;D_2__Clostridia;D_3__Clostridiales;D_4__Ruminococcaceae;D_5__Ruminococcus 2
126bcb4a808e0114f4623088f548be7c	0	0	0	0	0	1	0	1	0	0	0	0	0	0	0	0	0	0	0	0	0	0	2	0	1	0	0	0	0	0	0	0	0	1	1	0	D_0__Bacteria;D_1__Actinobacteria;D_2__Thermoleophilia;D_3__Gaiellales;D_4__uncultured;D_5__bacterium Ellin7530;D_6__bacterium Ellin7530
6f908b8e7ebe052bc3b9ef6784286563	0	1	1	0	0	4	2	1	0	0	0	2	0	5	0	0	0	7	5	0	2	4	9	5	0	0	6	2	1	4	0	0	3	0	1	0	D_0__Bacteria;D_1__Proteobacteria;D_2__Alphaproteobacteria;D_3__Rhizobiales;D_4__Rhizobiaceae;D_5__Allorhizobium-Neorhizobium-Pararhizobium-Rhizobium
0d386a9a5b377cad775c64291e86385f	2	0	2	0	5	0	0	0	0	0	0	2	0	5	3	0	0	0	0	0	0	0	0	0	6	0	1	0	2	1	4	1	0	0	3	0	D_0__Bacteria;D_1__Actinobacteria;D_2__Actinobacteria
602d0bed4bbf28dfeea0e1c5cf8b2d8d	0	0	2	0	0	0	0	0	0	0	0	0	0	3	0	0	0	0	0	0	0	0	0	0	1	3	0	5	3	0	0	0	4	1	5	0	D_0__Bacteria;D_1__Proteobacteria;D_2__Gammaproteobacteria;D_3__Cellvibrionales;D_4__Cellvibrionaceae;D_5__Cellvibrio
2ea0e7afe121ef53013438865f436caf	0	0	0	0	2	0	0	2	0	0	0	0	0	0	0	0	0	0	0	0	2	0	2	0	0	0	3	3	0	0	0	0	0	0	0	0	D_0__Bacteria;D_1__Actinobacteria;D_2__Actinobacteria;D_3__Corynebacteriales;D_4__Mycobacteriaceae;D_5__Mycobacterium
85ceed091fde035c1962e40f855a9a6c	1	4	0	0	0	0	2	0	0	0	0	0	0	0	2	0	5	0	0	3	2	2	0	0	0	0	2	0	1	0	0	0	0	2	0	0	D_0__Bacteria;D_1__Acidobacteria;D_2__Acidobacteriia;D_3__Acidobacteriales;D_4__Acidobacteriaceae (Subgroup 1);D_5__uncultured;D_6__uncultured Acidobacteriales bacterium
31a96ca190a0c3313380cc76856a81e3	3	2	1	4	1	1	0	0	0	0	0	0	0	0	0	0	0	0	0	0	0	1	0	0	0	0	0	0	0	0	0	0	2	0	0	0	D_0__Bacteria;D_1__Proteobacteria;D_2__Alphaproteobacteria;D_3__Micropepsales;D_4__Micropepsaceae
9702ede837b84a694f498bbbd56946d4	0	0	0	1	0	0	5	0	0	0	0	0	0	0	0	1	0	3	0	0	28	0	0	0	4	0	0	0	1	0	0	0	0	0	0	0	D_0__Bacteria;D_1__Verrucomicrobia;D_2__Verrucomicrobiae;D_3__Verrucomicrobiales;D_4__Rubritaleaceae;D_5__Luteolibacter
b2cadd77eaff66b96aaa59078435e59b	0	0	0	0	0	0	0	0	0	0	0	0	0	0	0	0	0	3	0	0	0	0	0	0	0	0	0	0	1	0	0	0	0	0	0	0	D_0__Bacteria;D_1__Bacteroidetes;D_2__Bacteroidia;D_3__Chitinophagales;D_4__Chitinophagaceae
cec7123d599dbc4a12ec6b549724e9cd	0	0	0	0	0	0	0	0	0	0	0	0	0	2	2	1	0	0	0	0	0	0	0	0	2	0	0	0	1	0	0	0	0	0	0	0	D_0__Bacteria;D_1__Bacteroidetes;D_2__Bacteroidia;D_3__Chitinophagales;D_4__Chitinophagaceae;D_5__Parafilimonas;D_6__uncultured Chitinophagaceae bacterium
7fa38d797d899594dc75867f6f41fa75	0	9	1	1	8	26	0	0	0	0	0	0	0	1	2	6	2	1	1	10	3	0	0	0	0	0	2	0	0	0	0	0	0	0	0	0	D_0__Bacteria;D_1__Proteobacteria;D_2__Alphaproteobacteria;D_3__Caulobacterales;D_4__Caulobacteraceae
0bd9589a398fc9cd6225fcf9cc74ea1a	0	0	0	0	0	0	0	0	1	1	0	0	2	2	2	0	0	0	0	0	0	1	0	0	1	0	0	0	1	1	3	0	0	0	0	0	D_0__Bacteria;D_1__Proteobacteria;D_2__Gammaproteobacteria;D_3__Xanthomonadales;D_4__Rhodanobacteraceae;D_5__Dyella
872514987534454b3eba7cceb9bfadb0	0	1	1	0	0	0	0	0	0	0	1	0	0	6	0	0	0	0	0	0	0	0	0	0	0	2	0	0	2	0	0	0	0	0	2	0	D_0__Bacteria;D_1__Patescibacteria;D_2__Saccharimonadia;D_3__Saccharimonadales
86277df69568a336743b427f66d37f96	0	2	2	0	0	0	0	0	0	0	2	0	0	0	0	0	0	0	0	0	0	0	0	0	0	0	0	0	0	0	0	0	0	1	1	3	D_0__Bacteria;D_1__Gemmatimonadetes;D_2__Gemmatimonadetes;D_3__Gemmatimonadales;D_4__Gemmatimonadaceae;D_5__Gemmatimonas;D_6__Gemmatimonadetes bacterium Ellin7146
db15a91d2ea8b19653a5e77a77ed3277	0	0	0	0	3	0	1	2	1	1	4	1	0	0	0	0	0	0	0	0	0	0	0	0	0	0	0	0	0	0	0	0	0	0	0	0	D_0__Bacteria;D_1__Acidobacteria;D_2__Acidobacteriia;D_3__Solibacterales;D_4__Solibacteraceae (Subgroup 3);D_5__Candidatus Solibacter;D_6__bacterium Ellin6505
4839b0e6c25cf9eb2de6809fbe9d1834	3	2	2	4	0	0	1	3	3	1	0	4	0	0	0	0	0	0	0	0	0	3	0	2	0	0	0	0	0	0	1	2	2	2	2	4	D_0__Bacteria;D_1__Acidobacteria;D_2__Subgroup 6
7faaeff0af7d210e25a97d5871a565f9	0	0	0	0	0	0	0	0	0	0	0	0	3	0	0	0	0	0	0	0	2	1	0	0	3	0	0	0	0	0	0	0	0	0	0	0	D_0__Bacteria;D_1__Verrucomicrobia;D_2__Verrucomicrobiae;D_3__Chthoniobacterales;D_4__Chthoniobacteraceae;D_5__Candidatus Udaeobacter
21cb15a0a1d7297c740bd52706d7ae55	0	0	0	0	0	0	0	4	0	0	0	2	0	0	0	0	0	0	0	1	0	1	0	0	0	1	0	2	0	0	2	0	2	2	0	0	D_0__Bacteria;D_1__Proteobacteria;D_2__Alphaproteobacteria;D_3__Rhodospirillales;D_4__Rhodopirillaceae;D_5__Defluviicoccus;D_6__uncultured Defluviicoccus sp.
d01d07af9881ba0de222857595ccaeb4	0	1	0	1	0	2	3	0	0	0	0	0	1	0	0	0	0	0	0	0	0	0	0	0	0	0	0	0	3	0	0	2	3	2	0	0	D_0__Bacteria;D_1__Acidobacteria;D_2__Acidobacteriia;D_3__Solibacterales;D_4__Solibacteraceae (Subgroup 3);D_5__Candidatus Solibacter
da5b186b2225f76518fae8ea41be0a25	0	0	0	0	0	0	0	0	0	0	0	0	0	0	0	0	0	0	0	0	0	2	0	0	0	1	0	0	0	0	2	1	1	0	0	0	D_0__Bacteria;D_1__Acidobacteria;D_2__Acidobacteriia
2d2b8cc670899df778482abc3d11f8ea	0	2	0	0	3	0	1	0	0	2	0	0	0	0	0	0	0	0	0	10	3	0	0	23	0	0	0	0	0	0	0	0	0	0	0	2	D_0__Bacteria;D_1__Patescibacteria;D_2__Saccharimonadia;D_3__Saccharimonadales
1ead54ae24c6df05027d6c392e191c11	0	2	0	0	0	2	0	0	0	0	0	4	0	2	0	0	0	0	0	0	1	0	0	0	0	0	0	0	0	0	0	2	0	0	0	1	D_0__Bacteria;D_1__Proteobacteria;D_2__Alphaproteobacteria;D_3__Acetobacterales;D_4__Acetobacterales Incertae Sedis;D_5__Zavarzinia;D_6__uncultured Oleomonas sp.
f90ed2ebd2f85d5ed1195bbb01d5b947	0	0	0	2	0	0	2	1	0	5	0	0	4	1	0	1	0	0	2	0	3	0	10	0	1	0	0	11	0	5	3	11	8	6	8	10	D_0__Bacteria;D_1__Gemmatimonadetes;D_2__Gemmatimonadetes;D_3__Gemmatimonadales;D_4__Gemmatimonadaceae;D_5__uncultured;D_6__uncultured proteobacterium
9dd751ab4472c2ebf452be6e55325a56	0	0	0	0	0	0	0	0	2	0	0	0	0	2	0	1	0	4	0	0	0	0	0	3	0	0	5	0	0	0	0	0	0	0	0	0	D_0__Bacteria;D_1__Patescibacteria;D_2__Saccharimonadia;D_3__Saccharimonadales
023a90d2582d62576e93b6f652dfec1e	0	0	0	0	0	0	0	0	0	0	0	0	0	0	4	0	0	0	0	0	0	0	3	0	0	0	0	0	0	0	0	0	0	0	0	0	D_0__Bacteria;D_1__Bacteroidetes;D_2__Bacteroidia;D_3__Chitinophagales;D_4__Chitinophagaceae;D_5__uncultured
5887b271d64f44c88396b833dcea1575	2	1	0	1	3	0	1	0	0	1	0	2	2	3	5	3	0	4	0	0	0	2	0	0	4	0	0	2	0	0	3	0	2	2	2	0	D_0__Bacteria;D_1__Actinobacteria;D_2__Thermoleophilia;D_3__Gaiellales;D_4__uncultured
f885eea0418ab33cba483f028810f11b	0	0	0	0	0	0	0	0	0	0	0	0	0	0	0	0	0	0	0	0	0	0	0	0	0	0	0	0	0	0	2	1	2	0	2	0	D_0__Bacteria;D_1__Proteobacteria;D_2__Gammaproteobacteria;D_3__Betaproteobacteriales;D_4__Burkholderiaceae;D_5__uncultured;D_6__Burkholderiales bacterium X4
bcfeda1e1975f60034aabbc3ef3fb0b6	0	3	1	0	2	0	1	2	2	2	2	3	0	0	0	0	0	0	1	0	0	3	0	0	0	0	0	0	0	0	0	0	0	0	0	0	D_0__Bacteria;D_1__Bacteroidetes;D_2__Bacteroidia;D_3__Chitinophagales;D_4__Chitinophagaceae;D_5__Terrimonas
cf17a7ef7c5389e9d2a3da52cea42a77	1	0	0	1	0	0	0	0	0	0	0	0	0	0	0	3	0	0	0	0	0	0	1	0	1	0	0	3	0	2	0	0	0	0	0	0	D_0__Bacteria;D_1__Gemmatimonadetes;D_2__Gemmatimonadetes;D_3__Gemmatimonadales;D_4__Gemmatimonadaceae;D_5__uncultured
ae0f6560f9470599ca5b426d85844362	3	1	0	3	2	1	0	0	4	0	0	1	3	0	0	0	0	3	0	0	1	0	5	0	4	1	3	2	2	2	4	1	2	2	0	0	D_0__Bacteria;D_1__Actinobacteria;D_2__Actinobacteria;D_3__Corynebacteriales;D_4__Mycobacteriaceae;D_5__Mycobacterium
4c78da7023ff49226774bedbf357ad77	0	0	1	0	0	0	0	7	4	1	5	2	0	5	4	2	0	0	3	5	2	2	4	0	2	4	11	0	0	0	3	1	2	1	3	3	D_0__Bacteria
5a5c090075abb4cf26f1071d9d37396d	0	0	0	0	1	0	0	0	0	0	0	0	0	0	0	0	3	0	0	0	0	0	0	0	0	0	0	0	0	0	0	2	0	0	0	0	D_0__Bacteria;D_1__Bacteroidetes;D_2__Bacteroidia;D_3__Sphingobacteriales;D_4__Sphingobacteriaceae;D_5__Pedobacter
f4c6b108bb4c3cfe5b070f4e87a45dbc	0	0	0	0	0	0	0	0	0	0	0	0	1	2	0	1	0	0	0	0	0	1	0	0	1	0	0	0	0	0	1	0	0	3	0	5	D_0__Bacteria;D_1__Proteobacteria;D_2__Deltaproteobacteria;D_3__NB1-j;D_4__uncultured Desulfoglaeba sp.;D_5__uncultured Desulfoglaeba sp.;D_6__uncultured Desulfoglaeba sp.
93ccb78d7709700ac2990c9f478e1fe4	0	0	0	0	0	0	0	0	0	0	0	0	0	0	1	0	0	0	0	0	0	1	0	0	0	0	0	0	0	2	0	2	0	0	0	0	D_0__Bacteria;D_1__Proteobacteria;D_2__Alphaproteobacteria;D_3__Rhodospirillales;D_4__uncultured;D_5__uncultured soil bacterium;D_6__uncultured soil bacterium
b5948405674476b33f7e676e89bc16a4	2	0	0	6	1	0	0	0	0	0	0	0	4	0	0	0	0	0	0	0	0	0	0	0	10	1	0	0	1	0	0	0	0	0	0	0	D_0__Bacteria;D_1__Patescibacteria;D_2__Saccharimonadia;D_3__Saccharimonadales
91454424d45e0398689a4dc9542958d8	0	0	0	2	0	0	0	0	1	2	0	0	0	0	0	0	0	0	0	3	0	2	0	2	2	0	0	0	0	0	0	0	0	0	0	0	D_0__Bacteria;D_1__Bacteroidetes;D_2__Bacteroidia;D_3__Chitinophagales;D_4__Chitinophagaceae
9e8e181a96ef20ec9e9a036b9d7b7372	0	0	0	0	0	0	2	0	4	0	0	0	2	0	0	0	0	0	2	0	0	0	2	3	0	0	3	5	0	4	1	0	0	1	0	1	D_0__Bacteria;D_1__Acidobacteria;D_2__Holophagae;D_3__Subgroup 7;D_4__uncultured Desulfovirga sp.;D_5__uncultured Desulfovirga sp.;D_6__uncultured Desulfovirga sp.
f59017eec9e6b6678ffd9ff0f9b68014	0	0	0	0	0	0	0	0	0	1	1	2	0	0	0	0	0	0	0	0	0	0	0	0	0	0	0	0	0	0	1	0	0	2	3	3	D_0__Bacteria;D_1__Acidobacteria;D_2__Acidobacteriia;D_3__Solibacterales;D_4__Solibacteraceae (Subgroup 3);D_5__Candidatus Solibacter;D_6__bacterium Ellin6505
a5a963792f7b7cee207d2805ff9f0d17	3	0	0	0	0	0	0	0	0	0	0	0	0	0	0	0	0	0	2	0	0	0	0	0	0	0	0	0	2	0	0	0	0	0	0	0	D_0__Bacteria;D_1__Actinobacteria;D_2__Actinobacteria;D_3__Micromonosporales;D_4__Micromonosporaceae
8140cdff1e6bed17cfa7b246b5afb96d	0	0	0	0	0	0	0	0	1	0	0	0	0	0	0	0	0	0	0	0	0	0	0	0	2	0	0	0	0	0	0	0	0	0	0	0	D_0__Bacteria;D_1__Firmicutes;D_2__Bacilli;D_3__Bacillales;D_4__Bacillaceae
a29a1925360857fc3ae13ef4a0361573	2	0	0	0	2	2	2	0	0	2	2	0	1	2	0	0	0	2	0	0	5	2	2	0	0	0	2	0	0	2	0	1	0	0	2	2	D_0__Bacteria;D_1__Proteobacteria;D_2__Gammaproteobacteria;D_3__Betaproteobacteriales;D_4__Burkholderiaceae
1c33bbc85dbe18ab944f45e441ff3d82	2	1	0	1	1	2	0	0	0	0	3	0	3	0	2	1	0	1	2	2	4	0	1	0	0	0	3	0	0	0	3	1	4	3	0	0	D_0__Bacteria;D_1__Gemmatimonadetes;D_2__Gemmatimonadetes;D_3__Gemmatimonadales;D_4__Gemmatimonadaceae;D_5__Gemmatimonas
9585ff5a9298f1a141350e8c67fc234f	0	0	0	0	0	0	0	0	0	0	0	0	0	0	1	0	0	0	1	0	0	1	0	0	0	0	0	0	1	0	0	0	0	0	0	0	D_0__Bacteria;D_1__Proteobacteria;D_2__Gammaproteobacteria;D_3__Betaproteobacteriales;D_4__SC-I-84
6a128ce2be3601107b2b6e3faac3c97f	0	0	0	0	0	0	0	0	0	0	0	0	0	0	0	0	0	0	2	0	3	0	0	0	0	0	2	0	0	0	0	0	0	0	0	2	D_0__Bacteria;D_1__Firmicutes;D_2__Clostridia;D_3__Clostridiales;D_4__Lachnospiraceae;D_5__Roseburia;D_6__Roseburia inulinivorans
10c5232184136d0e2eb1d3d9a71a03c5	0	0	0	0	0	0	0	0	0	0	0	0	0	3	0	0	0	1	0	0	0	0	0	0	2	0	0	0	1	0	0	0	0	0	0	0	D_0__Bacteria;D_1__Patescibacteria;D_2__Saccharimonadia;D_3__Saccharimonadales;D_4__uncultured bacterium SBR1071;D_5__uncultured bacterium SBR1071;D_6__uncultured bacterium SBR1071
248329aae36e453e726b369b23166f24	0	0	0	0	0	3	0	0	0	0	0	0	0	0	0	0	0	0	0	0	0	0	0	0	0	0	1	0	0	0	0	0	0	0	0	0	D_0__Bacteria;D_1__Bacteroidetes;D_2__Bacteroidia;D_3__Cytophagales;D_4__Microscillaceae
5bfdbd436372c3961802d9dbdd4719c4	0	0	0	1	0	0	0	2	0	0	0	0	0	0	0	0	0	0	0	2	0	0	0	0	0	0	0	0	0	0	0	0	0	0	0	0	D_0__Bacteria;D_1__Chloroflexi;D_2__JG30-KF-CM66
68887de546d9315f4d02ca5021bd6ac3	1	2	3	1	4	0	1	2	7	7	4	7	4	0	0	0	2	2	3	2	0	5	3	2	6	2	0	0	3	4	3	2	4	5	4	6	D_0__Bacteria;D_1__Proteobacteria;D_2__Gammaproteobacteria;D_3__Betaproteobacteriales;D_4__Nitrosomonadaceae;D_5__Ellin6067
7537fc22381e8e971371b7f757dd3e0a	0	0	0	0	0	0	0	0	0	0	0	0	0	1	0	3	0	0	0	4	1	2	0	0	0	1	2	0	0	0	0	0	0	0	0	0	D_0__Bacteria;D_1__Gemmatimonadetes;D_2__Gemmatimonadetes;D_3__Gemmatimonadales;D_4__Gemmatimonadaceae;D_5__uncultured
e975ef712fd651e3598c6f28e681124d	1	0	4	0	0	0	0	0	0	0	2	0	0	0	0	0	0	1	0	0	0	0	0	0	0	0	2	0	0	0	0	0	0	0	0	0	D_0__Bacteria;D_1__Proteobacteria;D_2__Deltaproteobacteria;D_3__Myxococcales;D_4__Haliangiaceae;D_5__Haliangium;D_6__uncultured sludge bacterium A9
7de69053a357e332144d6197d0c764dd	0	1	0	0	0	0	0	0	0	0	0	0	0	0	0	0	0	0	0	0	0	0	0	0	0	0	0	0	0	0	0	0	3	1	0	0	D_0__Bacteria;D_1__Gemmatimonadetes;D_2__Gemmatimonadetes;D_3__Gemmatimonadales;D_4__Gemmatimonadaceae
45cbde3552b5909921f1d39ced10b56a	0	2	0	0	1	0	1	1	7	0	0	2	4	0	2	2	0	0	0	0	1	0	0	0	0	0	0	0	1	0	0	0	0	0	0	0	D_0__Bacteria;D_1__Acidobacteria;D_2__Holophagae;D_3__Subgroup 7;D_4__uncultured candidate division OS-K bacterium;D_5__uncultured candidate division OS-K bacterium;D_6__uncultured candidate division OS-K bacterium
c6a05a49e4680cfdfbbbf1aa2373dd24	0	0	0	0	0	0	0	0	0	0	0	0	2	0	0	1	0	0	0	0	0	0	1	0	0	0	0	0	0	5	0	0	0	0	0	0	D_0__Bacteria;D_1__Actinobacteria;D_2__Thermoleophilia;D_3__Gaiellales
2cbcc68dd32852397099a9d36118cf5f	0	0	0	0	0	0	0	0	1	0	1	1	0	0	0	0	0	0	0	0	0	0	0	0	0	0	0	0	0	0	0	0	0	3	0	0	D_0__Bacteria;D_1__Proteobacteria;D_2__Gammaproteobacteria;D_3__Betaproteobacteriales;D_4__Burkholderiaceae;D_5__Cupriavidus
355181652b62e552e6895cf8976186fc	3	0	0	0	2	1	0	0	2	0	1	0	0	0	0	0	0	0	0	0	0	0	0	0	0	0	0	0	0	0	0	0	3	0	1	2	D_0__Bacteria;D_1__Proteobacteria;D_2__Gammaproteobacteria;D_3__Betaproteobacteriales;D_4__Nitrosomonadaceae;D_5__Nitrosospira
9384c9ed93edbeb26a2feb3c2870cd1f	0	0	0	0	0	0	0	0	0	0	0	0	0	1	0	0	0	0	0	0	0	0	0	0	0	0	0	0	0	0	0	0	0	0	6	0	D_0__Bacteria;D_1__Bacteroidetes;D_2__Bacteroidia;D_3__Flavobacteriales;D_4__Weeksellaceae;D_5__Chryseobacterium
485e76d008746d23b713d2467a945ec3	0	0	0	3	0	0	0	0	0	0	1	0	2	0	2	1	0	0	2	0	4	0	1	1	0	2	2	5	2	1	0	0	0	0	0	0	D_0__Bacteria;D_1__Gemmatimonadetes;D_2__Gemmatimonadetes;D_3__Gemmatimonadales;D_4__Gemmatimonadaceae;D_5__Gemmatimonas
ff46ed4b03ca60a5f695220fe6cc4529	0	0	0	0	0	0	0	0	0	2	0	0	0	0	0	0	0	0	1	2	0	0	0	1	0	0	0	0	2	0	0	0	0	0	0	0	D_0__Bacteria;D_1__Rokubacteria;D_2__NC10;D_3__Rokubacteriales
7afeade0533874e36d959d69b9215fa9	0	0	5	0	1	2	2	1	0	0	2	1	0	0	0	0	0	0	0	0	0	0	0	0	0	0	1	0	0	0	3	0	2	0	0	0	D_0__Bacteria;D_1__Proteobacteria;D_2__Deltaproteobacteria;D_3__Myxococcales;D_4__Haliangiaceae;D_5__Haliangium
3362033ccb30634f618ba278e7dd86a4	0	0	0	0	0	0	0	0	0	0	0	0	0	7	0	3	0	0	0	0	0	0	0	0	0	0	0	0	0	0	0	0	0	0	2	0	D_0__Bacteria;D_1__Proteobacteria;D_2__Gammaproteobacteria;D_3__Pseudomonadales;D_4__Moraxellaceae;D_5__Acinetobacter
a3247aeab2401af0963e893a26906d92	3	0	1	0	4	0	2	2	0	0	6	2	0	3	2	1	1	0	0	2	4	0	0	0	0	0	0	4	0	2	2	1	1	0	2	1	D_0__Bacteria;D_1__Proteobacteria;D_2__Gammaproteobacteria;D_3__Pseudomonadales;D_4__Pseudomonadaceae;D_5__Pseudomonas
b32325892c9c1f47fd537e13d86c4139	1	0	0	0	0	0	0	0	0	0	0	0	1	1	2	0	4	8	4	2	4	0	3	4	2	3	0	2	0	1	0	0	0	0	0	0	D_0__Bacteria;D_1__Bacteroidetes;D_2__Bacteroidia;D_3__Chitinophagales;D_4__Chitinophagaceae;D_5__Parafilimonas
b9681d6a69449f58c5d284d95db4f10d	1	0	0	1	0	0	0	0	0	0	0	0	0	0	0	0	0	0	0	0	0	0	0	0	0	0	0	0	0	0	0	0	0	0	0	0	D_0__Bacteria;D_1__Actinobacteria;D_2__Thermoleophilia;D_3__Gaiellales;D_4__uncultured
b2cd907e9e3bab0d7a2b341af3d52f5d	0	0	0	0	0	0	0	0	0	0	0	0	0	4	0	0	0	0	0	0	0	0	2	0	0	0	0	0	0	0	0	0	0	0	0	0	D_0__Bacteria;D_1__Actinobacteria;D_2__Acidimicrobiia;D_3__Microtrichales
e31ae4b901631483815e0808f5654123	5	7	5	14	9	0	11	7	5	0	4	0	9	10	6	4	8	5	4	0	14	1	1	8	18	11	4	6	13	11	3	2	12	2	2	4	D_0__Bacteria;D_1__Proteobacteria;D_2__Gammaproteobacteria;D_3__Betaproteobacteriales;D_4__SC-I-84
3e51d65e9feab52b80c8e39ae293ab65	3	2	1	2	2	1	0	1	1	0	1	2	14	5	4	2	2	7	9	0	2	5	4	0	0	4	2	8	0	3	0	1	2	6	0	1	D_0__Bacteria;D_1__Proteobacteria;D_2__Gammaproteobacteria
4c08433f393be2253d6980bd2c3edb07	0	6	18	3	2	4	3	0	0	2	2	0	0	4	0	0	2	0	2	0	7	0	0	1	3	6	2	2	7	4	0	4	4	1	5	1	D_0__Bacteria;D_1__Proteobacteria;D_2__Gammaproteobacteria;D_3__Steroidobacterales;D_4__Steroidobacteraceae
b351df868b490990cc3ef3f901d5adac	0	0	0	0	0	0	0	0	0	0	0	0	1	0	2	1	1	1	3	3	2	0	1	0	1	5	0	2	0	1	0	0	0	0	0	0	D_0__Bacteria;D_1__Proteobacteria;D_2__Deltaproteobacteria;D_3__RCP2-54;D_4__uncultured soil bacterium;D_5__uncultured soil bacterium;D_6__uncultured soil bacterium
c161fdb7cbe6e34fecc2bf817ac72294	0	0	0	0	0	0	0	0	0	0	0	0	0	0	0	0	0	0	0	0	1	0	1	2	1	0	0	0	1	0	0	0	0	0	0	0	D_0__Bacteria;D_1__Proteobacteria;D_2__Deltaproteobacteria;D_3__Myxococcales;D_4__Haliangiaceae;D_5__Haliangium;D_6__myxobacterium AT3-03
9fad0a92792d259b73a5b7df845738cf	0	0	0	0	0	0	0	0	1	2	1	0	0	1	3	0	0	0	0	0	0	0	0	0	0	0	0	0	0	0	0	0	0	0	0	1	D_0__Bacteria;D_1__Proteobacteria;D_2__Alphaproteobacteria;D_3__Rhizobiales;D_4__Rhizobiaceae;D_5__Allorhizobium-Neorhizobium-Pararhizobium-Rhizobium
f8bb3c42340ef9bd1e42d2130c7808a5	0	0	1	0	2	1	0	0	1	0	0	0	0	0	0	0	0	0	1	0	0	2	0	0	0	1	0	0	0	0	0	1	2	4	1	2	D_0__Bacteria;D_1__Proteobacteria;D_2__Deltaproteobacteria;D_3__Desulfarculales;D_4__Desulfarculaceae;D_5__uncultured
82c5ed98f9d9bd1fc7dd5fce20d7abae	0	0	0	0	0	0	0	0	0	0	0	0	0	0	1	0	0	1	3	0	0	0	0	0	0	0	0	3	0	0	0	0	0	0	0	0	D_0__Bacteria;D_1__Proteobacteria;D_2__Alphaproteobacteria;D_3__Elsterales;D_4__uncultured;D_5__Acetobacteraceae bacterium WX59;D_6__Acetobacteraceae bacterium WX59
02f0c8a8eaecb6cfeaa527210d3b66ce	0	0	2	0	0	0	0	0	0	0	2	0	1	0	0	0	0	0	0	0	0	0	0	0	0	0	2	0	2	0	1	1	2	1	0	1	D_0__Bacteria;D_1__Verrucomicrobia;D_2__Verrucomicrobiae;D_3__Pedosphaerales;D_4__Pedosphaeraceae;D_5__ADurb.Bin063-1;D_6__uncultured prokaryote
26a830b6e0ab975294b16861d996e2b3	0	0	0	0	0	0	0	0	0	0	0	0	0	0	4	0	0	0	0	0	0	0	0	0	0	0	0	0	0	0	0	0	0	0	0	13	D_0__Bacteria;D_1__Bacteroidetes;D_2__Bacteroidia;D_3__Flavobacteriales;D_4__Weeksellaceae;D_5__Chryseobacterium
66d30d1940e350a64b2eb33fbba6d04d	0	3	0	1	2	2	0	0	0	0	0	0	0	0	0	2	0	0	0	0	0	0	0	0	0	0	0	0	0	0	0	0	0	0	0	0	D_0__Bacteria;D_1__Chloroflexi;D_2__Chloroflexia;D_3__Thermomicrobiales;D_4__Thermomicrobiaceae
91e052b42b27d139b6800eaad1aaf54c	0	0	0	0	0	0	0	0	0	0	0	0	0	0	0	0	0	0	0	0	0	0	0	0	0	0	0	0	0	0	0	0	1	0	1	0	D_0__Bacteria;D_1__Actinobacteria;D_2__Actinobacteria;D_3__Micrococcales;D_4__Intrasporangiaceae
662507f7b627824bf2e382bbd6118360	0	0	0	0	0	0	0	0	0	0	0	0	2	0	1	2	0	0	0	0	0	2	0	0	1	0	0	0	0	0	0	0	0	0	0	0	D_0__Bacteria;D_1__Proteobacteria;D_2__Alphaproteobacteria;D_3__Elsterales;D_4__uncultured
f1bb4b3d4454eb136acbfa9cdcdebf90	0	0	0	0	0	0	0	0	0	0	0	0	0	0	0	0	0	0	1	3	0	0	0	0	0	0	0	0	0	0	0	0	0	0	0	0	D_0__Bacteria
38e896d83ffb9f8df91ec1fe6330333e	3	4	1	8	4	0	2	1	4	0	1	2	9	1	13	7	8	2	0	5	4	4	0	1	6	1	1	5	4	2	2	0	0	0	2	0	D_0__Bacteria;D_1__Proteobacteria;D_2__Gammaproteobacteria;D_3__Xanthomonadales;D_4__Rhodanobacteraceae;D_5__Mizugakiibacter
55e64f4626fa6f4c58c1ceb981330d1e	0	0	4	2	0	0	0	0	0	0	1	0	0	0	0	0	0	0	0	0	0	0	0	0	0	0	0	0	0	0	0	0	0	1	0	0	D_0__Bacteria;D_1__Actinobacteria;D_2__Acidimicrobiia;D_3__Microtrichales;D_4__Ilumatobacteraceae;D_5__Ilumatobacter
6d390b35f6044e8ca48a207fea942773	0	0	0	1	0	0	0	0	0	1	0	0	0	0	2	0	0	0	0	0	0	0	0	0	2	0	1	3	3	0	0	0	0	0	0	0	D_0__Bacteria;D_1__Chloroflexi;D_2__JG30-KF-CM66;D_3__uncultured Armatimonadetes bacterium;D_4__uncultured Armatimonadetes bacterium;D_5__uncultured Armatimonadetes bacterium;D_6__uncultured Armatimonadetes bacterium
ab5486f8c273e692f9b536400f60648f	0	0	0	0	0	0	0	0	2	0	0	0	0	1	0	0	0	0	0	0	0	1	0	0	0	1	0	0	0	0	0	0	1	0	0	0	D_0__Bacteria;D_1__Acidobacteria;D_2__Acidobacteriia;D_3__Solibacterales;D_4__Solibacteraceae (Subgroup 3);D_5__Candidatus Solibacter;D_6__bacterium Ellin7504
1d3882bd568351174086260054537263	0	1	4	2	2	0	0	1	0	3	4	0	0	3	0	0	2	0	2	0	4	0	0	0	0	2	0	0	1	5	0	0	0	1	0	1	D_0__Bacteria;D_1__Proteobacteria;D_2__Deltaproteobacteria;D_3__Desulfarculales;D_4__Desulfarculaceae;D_5__uncultured;D_6__metagenome
eacdc8cd172840ad91eca8b3b39b0bf5	0	0	0	0	0	0	1	0	0	0	1	0	0	2	2	0	0	0	0	0	0	1	0	0	0	0	0	0	0	0	0	0	0	0	1	0	D_0__Bacteria;D_1__Acidobacteria;D_2__Acidobacteriia;D_3__Acidobacteriales;D_4__uncultured;D_5__uncultured delta proteobacterium;D_6__uncultured delta proteobacterium
edb8882dab5deda4a5dab65fc89d1ec6	0	0	0	2	0	0	0	0	0	0	0	0	0	0	0	0	0	0	0	0	2	0	0	0	0	0	0	0	0	0	0	0	0	2	1	0	D_0__Bacteria;D_1__Actinobacteria;D_2__Actinobacteria
45d9fd82b733ccb6a055a5f5916e30d2	0	0	0	6	0	0	0	0	0	0	0	0	0	0	0	0	0	0	0	1	0	0	0	0	0	0	0	0	0	0	0	0	0	0	0	0	D_0__Bacteria;D_1__Actinobacteria;D_2__Actinobacteria;D_3__Micrococcales;D_4__Microbacteriaceae
0acd5fa7ed1ab6f082567112a1649cfd	0	0	2	1	0	0	0	1	0	0	0	1	0	0	0	0	0	0	0	0	0	0	0	0	0	0	0	0	0	0	1	2	0	0	0	1	D_0__Bacteria;D_1__Verrucomicrobia;D_2__Verrucomicrobiae;D_3__Pedosphaerales;D_4__Pedosphaeraceae
62b3bd35caca22027696f67e734212a6	3	5	1	5	2	2	1	2	0	2	0	5	3	2	0	3	0	0	1	5	3	0	2	6	5	3	6	0	1	4	2	1	6	0	4	4	D_0__Bacteria;D_1__Proteobacteria;D_2__Deltaproteobacteria;D_3__Myxococcales;D_4__Haliangiaceae;D_5__Haliangium
acfb1dcdc59fe614064670e74d232ea6	0	1	0	0	0	1	0	0	0	2	0	0	4	0	0	0	1	0	0	0	0	0	0	0	0	0	0	3	0	0	0	2	1	0	2	4	D_0__Bacteria;D_1__Proteobacteria;D_2__Deltaproteobacteria;D_3__RCP2-54
fc41d85c0a176dd10fc3138253ec51fe	0	0	9	0	0	2	0	0	0	0	0	0	0	0	0	0	0	0	0	0	0	0	0	0	0	0	0	0	0	0	0	0	0	0	0	0	D_0__Bacteria;D_1__Proteobacteria;D_2__Gammaproteobacteria;D_3__Diplorickettsiales;D_4__Diplorickettsiaceae;D_5__uncultured
a6aba553efd774f8504100dd1612626a	0	0	0	1	0	0	2	0	0	1	0	0	0	0	0	0	0	0	0	0	0	0	0	0	0	0	0	0	0	0	0	0	0	0	2	0	D_0__Bacteria;D_1__Proteobacteria;D_2__Gammaproteobacteria;D_3__Steroidobacterales;D_4__Steroidobacteraceae;D_5__uncultured
3e4f0475ba39318f6773898db0e271bd	0	0	0	0	0	0	0	1	0	0	0	0	0	0	0	0	0	0	0	0	0	2	0	0	0	0	0	0	0	0	2	0	0	1	1	1	D_0__Bacteria;D_1__Acidobacteria;D_2__Blastocatellia (Subgroup 4);D_3__Pyrinomonadales;D_4__Pyrinomonadaceae;D_5__RB41;D_6__uncultured bacterium gp4
2a0b808b37944818317980f040cf7332	0	0	0	1	0	0	0	0	0	0	0	0	0	0	0	5	2	0	0	0	0	1	0	0	0	0	1	0	0	0	2	0	0	0	0	0	D_0__Bacteria;D_1__Proteobacteria;D_2__Alphaproteobacteria;D_3__Micropepsales;D_4__Micropepsaceae
541ccf08b7e9e9b2c072636d80ee4385	18	2	1	4	10	2	4	15	7	14	4	6	25	26	21	29	12	13	11	7	14	10	24	18	26	8	10	22	24	18	9	7	10	12	14	11	D_0__Bacteria;D_1__Proteobacteria;D_2__Alphaproteobacteria;D_3__Rhizobiales;D_4__Rhizobiaceae;D_5__Mesorhizobium
79bfaca96de50f0d6aa740a0000adcc8	3	2	2	2	5	5	1	1	1	0	1	0	0	0	0	1	2	0	0	0	1	0	0	1	0	0	0	0	0	0	1	1	3	0	0	0	D_0__Bacteria;D_1__Proteobacteria;D_2__Alphaproteobacteria;D_3__Reyranellales;D_4__Reyranellaceae;D_5__uncultured
e84c77a1d933b30c98f332f66fce834b	0	0	0	0	0	0	0	0	0	0	0	0	1	0	0	0	0	2	0	1	1	0	1	1	1	0	2	0	0	0	0	0	0	0	0	0	D_0__Bacteria;D_1__Proteobacteria;D_2__Gammaproteobacteria;D_3__Betaproteobacteriales;D_4__Nitrosomonadaceae;D_5__mle1-7;D_6__uncultured Burkholderiales bacterium
8c351a297fa594321c5c4b789612145e	0	0	1	0	0	1	0	0	0	3	0	0	0	5	8	7	2	3	0	1	2	1	1	1	5	7	0	4	4	10	0	1	0	3	0	0	D_0__Bacteria;D_1__Actinobacteria;D_2__Actinobacteria;D_3__Micrococcales;D_4__Cellulomonadaceae;D_5__Cellulomonas
8d6896664132a818b73f5b915a447f09	0	0	0	0	0	0	0	0	0	0	0	0	0	0	0	0	1	0	0	0	0	0	0	0	3	0	2	0	0	3	0	0	0	0	0	0	D_0__Bacteria;D_1__Chloroflexi;D_2__KD4-96;D_3__uncultured Longilinea sp.;D_4__uncultured Longilinea sp.;D_5__uncultured Longilinea sp.;D_6__uncultured Longilinea sp.
690aabd08425069cfd2c0342d4024675	0	0	0	2	1	0	0	0	0	0	0	0	0	0	0	1	0	0	0	0	2	0	0	0	0	0	0	0	2	0	0	0	0	0	0	0	D_0__Bacteria;D_1__Proteobacteria;D_2__Alphaproteobacteria;D_3__Elsterales;D_4__uncultured
044fdc118244092c2bea41efb060250f	0	0	0	0	0	1	0	0	0	0	0	0	1	0	0	0	0	0	0	0	0	2	0	0	1	0	0	0	0	0	0	0	0	0	0	0	D_0__Bacteria;D_1__Acidobacteria;D_2__Acidobacteriia;D_3__Subgroup 2;D_4__uncultured Holophaga sp.;D_5__uncultured Holophaga sp.;D_6__uncultured Holophaga sp.
e76defb9ee144f8df219f7dadd0a045b	0	0	0	0	0	0	0	0	1	0	2	1	0	0	0	0	0	0	0	0	0	0	0	0	0	0	0	0	0	1	0	0	0	1	0	0	D_0__Bacteria;D_1__Acidobacteria;D_2__Acidobacteriia;D_3__Solibacterales;D_4__Solibacteraceae (Subgroup 3);D_5__Bryobacter
626f7b75805f0288667cad53ffd1fcb6	0	0	0	0	1	0	0	1	0	0	1	0	0	0	0	0	0	0	0	0	0	1	2	0	0	0	1	0	0	0	1	1	1	0	0	0	D_0__Bacteria;D_1__Proteobacteria;D_2__Deltaproteobacteria;D_3__Myxococcales;D_4__Haliangiaceae;D_5__Haliangium;D_6__uncultured sludge bacterium A9
b93e8da39359f3c7b24a876b0521aa25	0	0	1	0	0	0	0	0	0	0	1	0	0	0	1	0	0	0	0	0	0	0	0	0	0	0	0	0	1	0	0	0	0	0	0	0	D_0__Bacteria;D_1__Proteobacteria;D_2__Gammaproteobacteria;D_3__Xanthomonadales;D_4__Xanthomonadaceae;D_5__Stenotrophomonas
4946fa226d2e5bda4e2c7188feddb953	3	3	1	1	4	1	0	0	1	2	1	6	3	1	2	0	2	5	5	5	1	1	5	3	2	0	3	6	2	3	6	3	2	0	1	3	D_0__Bacteria;D_1__Proteobacteria;D_2__Alphaproteobacteria;D_3__Rhizobiales;D_4__Xanthobacteraceae
adccc630e7dbccebd7fbff2fb0de6e19	0	0	0	0	0	0	0	0	1	0	0	2	0	0	0	0	0	0	0	0	0	0	0	0	0	1	4	0	0	0	0	2	0	0	0	0	D_0__Bacteria;D_1__Proteobacteria;D_2__Alphaproteobacteria;D_3__Rhizobiales;D_4__Xanthobacteraceae
5af619bc9444a8a690d5b455f1912224	0	1	0	0	0	0	0	0	3	1	4	3	0	3	0	0	0	0	0	0	0	1	0	0	0	0	0	0	0	0	1	0	2	1	1	0	D_0__Bacteria;D_1__Actinobacteria;D_2__Thermoleophilia;D_3__Gaiellales;D_4__uncultured
9b3c698f72dd416aadfe78c75058d4cc	0	0	0	0	1	3	0	0	0	4	0	2	0	0	0	0	0	0	0	0	1	0	0	0	0	0	0	0	0	0	1	0	0	0	0	2	D_0__Bacteria;D_1__Gemmatimonadetes;D_2__Gemmatimonadetes;D_3__Gemmatimonadales;D_4__Gemmatimonadaceae;D_5__Gemmatimonas
6834ee39976b409efaac8dfa196f5d8a	0	7	0	0	0	0	1	0	0	0	0	0	0	0	0	0	0	0	2	1	0	0	2	0	0	0	0	0	0	0	0	0	0	0	0	0	D_0__Bacteria;D_1__Acidobacteria;D_2__Blastocatellia (Subgroup 4);D_3__Blastocatellales;D_4__Blastocatellaceae;D_5__Stenotrophobacter;D_6__uncultured delta proteobacterium
6e3967e896f6f00f44296b49d686a87d	0	0	0	0	0	0	0	0	0	2	0	0	0	2	0	0	0	1	0	0	0	0	0	0	0	2	0	0	0	0	0	0	0	0	2	0	D_0__Bacteria;D_1__Proteobacteria;D_2__Gammaproteobacteria;D_3__Gammaproteobacteria Incertae Sedis;D_4__Unknown Family;D_5__Acidibacter;D_6__Punica granatum (pomegranate)
3386d2e2e82f93d8aa2d450adca19ad9	1	2	0	0	1	0	1	0	2	0	1	3	0	0	0	0	0	0	0	0	0	0	0	0	0	1	0	0	0	0	0	1	0	0	0	2	D_0__Bacteria;D_1__Actinobacteria;D_2__Acidimicrobiia;D_3__Acidimicrobiales;D_4__Acidimicrobiaceae;D_5__uncultured;D_6__uncultured actinobacterium
95f64fbacf111e37f4a80007553e0b2f	0	0	0	0	0	0	0	0	0	0	0	0	0	0	0	0	0	0	1	0	0	0	0	0	0	0	0	0	0	0	0	0	0	0	0	0	D_0__Bacteria;D_1__Proteobacteria;D_2__Alphaproteobacteria;D_3__Elsterales;D_4__uncultured;D_5__Acetobacteraceae bacterium WX59;D_6__Acetobacteraceae bacterium WX59
0d23680936f1ac6c3d76a21030554f40	0	3	0	0	0	0	0	2	0	1	0	0	0	1	0	0	0	0	4	5	0	0	5	0	0	0	0	0	0	0	0	0	0	0	1	0	D_0__Bacteria;D_1__Proteobacteria;D_2__Alphaproteobacteria
99250107c22c3142564fa4f33ae61f70	0	2	0	2	0	0	0	3	5	3	2	2	6	1	2	1	0	0	3	0	2	3	4	0	4	1	2	4	0	2	3	0	0	6	2	2	D_0__Bacteria;D_1__Proteobacteria;D_2__Deltaproteobacteria;D_3__Myxococcales;D_4__Haliangiaceae;D_5__Haliangium;D_6__bacterium Ellin6502
f7a81ac34e1ad80c4cab9ef5bef94112	0	0	0	0	0	0	0	0	0	0	0	0	0	0	0	1	0	0	0	1	0	0	2	0	0	0	0	0	0	0	0	0	0	3	2	0	D_0__Bacteria;D_1__Actinobacteria;D_2__Thermoleophilia;D_3__Gaiellales;D_4__Gaiellaceae;D_5__Gaiella
47713825208f87ebdc104187320f4a50	0	0	0	2	2	0	2	2	0	0	1	0	0	0	0	0	2	0	0	0	0	0	0	0	0	0	0	0	0	0	0	0	0	2	0	0	D_0__Bacteria;D_1__Patescibacteria;D_2__Saccharimonadia;D_3__Saccharimonadales
a53d85188b046ef2104ca8e7ec1db999	1	0	3	0	0	1	0	0	0	1	1	0	2	1	0	0	0	3	0	0	0	0	0	0	0	0	0	0	0	0	0	0	0	0	0	0	D_0__Bacteria;D_1__Actinobacteria;D_2__Thermoleophilia;D_3__Gaiellales;D_4__uncultured
b8ece0e837c01b809c5ee82c4ddca2ce	0	2	0	3	0	0	0	0	0	0	1	0	1	0	1	0	0	0	1	2	0	0	0	0	2	0	0	4	0	1	0	0	0	4	5	0	D_0__Bacteria;D_1__Actinobacteria;D_2__Thermoleophilia;D_3__Gaiellales;D_4__Gaiellaceae;D_5__Gaiella
21dec2935ffe86b6025ecdfc76b25d54	1	0	0	0	0	0	0	0	0	0	0	0	0	0	2	7	3	1	1	0	7	0	0	0	7	0	3	0	1	1	0	0	0	0	0	0	D_0__Bacteria;D_1__Bacteroidetes;D_2__Bacteroidia;D_3__Flavobacteriales;D_4__Flavobacteriaceae;D_5__Flavobacterium
0d72c10c89df8d4ece97de8a1ee9b39f	0	0	0	0	0	2	1	0	0	2	0	0	0	0	0	0	0	0	0	0	0	0	0	0	3	2	0	0	1	2	3	0	0	3	4	2	D_0__Bacteria;D_1__Firmicutes;D_2__Clostridia;D_3__Clostridiales;D_4__Clostridiaceae 1;D_5__Clostridium sensu stricto 1
09f0bd144a52318302be464667d2a44f	0	3	0	1	0	0	0	0	0	0	0	0	0	0	2	1	0	0	0	0	0	0	0	0	0	0	0	0	0	2	0	0	0	0	0	0	D_0__Bacteria;D_1__Proteobacteria;D_2__Alphaproteobacteria;D_3__Caulobacterales;D_4__Caulobacteraceae;D_5__Brevundimonas
03e233fa1256c5e02f91b2ec6ad35195	0	2	0	0	3	0	0	7	2	0	0	0	1	0	0	0	2	0	0	3	0	0	0	0	0	0	0	0	0	0	0	0	2	0	0	0	D_0__Bacteria;D_1__Verrucomicrobia;D_2__Verrucomicrobiae;D_3__Pedosphaerales;D_4__Pedosphaeraceae
b311306d875e592425ab062a0ec98381	2	7	5	0	0	3	0	0	0	1	0	0	4	6	2	0	1	3	6	0	4	6	0	1	3	1	1	5	1	1	5	2	6	6	4	5	D_0__Bacteria;D_1__Bacteroidetes;D_2__Bacteroidia;D_3__Chitinophagales;D_4__Chitinophagaceae;D_5__uncultured
93b7d5a7f328e4887a86420e15ea0166	0	0	0	0	2	0	2	0	0	0	1	0	0	0	2	0	1	3	0	0	2	0	0	0	0	0	0	0	0	0	0	0	0	0	0	0	D_0__Bacteria;D_1__Proteobacteria;D_2__Gammaproteobacteria;D_3__Betaproteobacteriales;D_4__SC-I-84
e097373a4b434256bc74024f98dc16d3	0	0	0	0	0	0	0	0	0	0	0	0	0	2	0	0	0	0	0	2	0	0	0	1	0	0	0	0	0	0	0	0	0	0	0	0	D_0__Bacteria;D_1__Bacteroidetes;D_2__Bacteroidia;D_3__Chitinophagales;D_4__Chitinophagaceae;D_5__Flavitalea
453e62827353736bf1cad5910c01b3bb	1	5	0	2	4	0	2	2	4	3	5	1	3	5	4	2	1	5	3	2	0	4	1	4	5	15	3	4	4	3	1	0	0	4	5	1	D_0__Bacteria;D_1__Proteobacteria;D_2__Gammaproteobacteria;D_3__Betaproteobacteriales;D_4__SC-I-84
93a38f695edd52e747f6351273b24a21	4	0	1	3	7	1	2	0	3	0	0	4	2	0	1	2	4	1	0	6	1	0	0	2	0	1	1	4	2	1	2	4	3	3	5	4	D_0__Bacteria;D_1__Proteobacteria;D_2__Gammaproteobacteria;D_3__Betaproteobacteriales;D_4__SC-I-84
95294f169e4c6e33a0a4f77c8e82b014	0	0	0	0	0	0	0	0	2	5	0	2	0	0	0	1	0	0	0	0	0	0	0	0	0	0	0	0	0	0	1	0	0	0	0	0	D_0__Bacteria;D_1__Firmicutes;D_2__Clostridia;D_3__Clostridiales;D_4__Clostridiaceae 1;D_5__Clostridium sensu stricto 8;D_6__uncultured Clostridiales bacterium
8cf5d003a35d6342e7297c942cdc1d54	0	0	1	0	0	0	0	0	0	0	0	0	0	0	0	0	0	0	2	0	1	0	0	0	0	3	0	0	0	0	0	0	1	0	0	0	D_0__Bacteria;D_1__Acidobacteria;D_2__Blastocatellia (Subgroup 4);D_3__Pyrinomonadales;D_4__Pyrinomonadaceae;D_5__RB41;D_6__uncultured delta proteobacterium
d6dcf391657eea745656644919e10a70	0	0	0	0	0	0	0	0	0	0	0	0	0	0	2	0	0	0	0	2	0	0	0	0	0	0	0	0	2	0	0	0	0	0	0	0	D_0__Archaea;D_1__Crenarchaeota;D_2__Bathyarchaeia;D_3__unidentified archaeon;D_4__unidentified archaeon;D_5__unidentified archaeon;D_6__unidentified archaeon
fbea31c24dfff1a8e119d27cc139f4d9	0	0	0	0	0	0	0	0	2	0	1	1	0	0	0	0	0	0	0	0	0	0	0	0	0	0	0	0	0	0	0	0	0	3	0	0	D_0__Bacteria;D_1__Proteobacteria;D_2__Alphaproteobacteria;D_3__Reyranellales;D_4__Reyranellaceae;D_5__Reyranella;D_6__uncultured proteobacterium
44f6f662efc451e7d4c80b3bd370a5db	0	0	0	0	0	0	0	0	0	0	0	0	0	0	0	0	0	0	0	0	0	0	0	3	0	0	0	0	0	0	0	0	0	0	2	0	D_0__Bacteria;D_1__Proteobacteria;D_2__Alphaproteobacteria;D_3__Rhizobiales;D_4__Rhizobiaceae;D_5__Allorhizobium-Neorhizobium-Pararhizobium-Rhizobium
9d9bb97aa8b7aa631933fb6b3885aed2	1	4	2	1	4	0	3	1	1	1	0	1	1	3	0	1	5	3	0	3	1	5	1	2	3	2	4	0	7	1	0	1	0	0	0	3	D_0__Bacteria;D_1__Actinobacteria;D_2__Thermoleophilia;D_3__Gaiellales;D_4__uncultured;D_5__uncultured bacterium 5G12;D_6__uncultured bacterium 5G12
a32523a71cebf2c3d180fd94c938d95f	0	0	0	0	0	0	0	0	0	0	0	0	0	0	0	0	0	0	7	0	0	0	2	0	0	0	0	0	0	0	0	0	0	0	0	0	D_0__Bacteria;D_1__Gemmatimonadetes;D_2__Gemmatimonadetes;D_3__Gemmatimonadales;D_4__Gemmatimonadaceae;D_5__uncultured
607c84734a2d0e466a72ed5d067f8323	0	3	4	0	1	0	0	0	3	3	2	5	0	0	0	3	0	0	0	3	0	4	2	0	0	0	0	0	2	3	7	2	4	3	1	5	D_0__Bacteria;D_1__Actinobacteria;D_2__Actinobacteria
231a9df73a5cc2627fa9cc258091e9a2	0	1	1	0	0	0	5	0	0	0	3	2	0	2	0	3	0	2	0	0	0	0	0	0	1	2	2	0	0	0	0	2	0	0	0	0	D_0__Bacteria;D_1__Verrucomicrobia;D_2__Verrucomicrobiae;D_3__Chthoniobacterales;D_4__Chthoniobacteraceae;D_5__Chthoniobacter
f6ae4991e60761090abe05ff29396e9c	0	0	0	0	2	0	0	0	0	0	0	0	0	0	0	0	0	0	0	1	0	0	0	0	0	0	0	0	0	0	0	1	0	0	0	0	D_0__Bacteria;D_1__Proteobacteria;D_2__Alphaproteobacteria;D_3__Elsterales;D_4__uncultured;D_5__Acetobacteraceae bacterium WX59;D_6__Acetobacteraceae bacterium WX59
f51299e3fb6207b0dbce102cd8256e8c	0	0	0	0	0	0	1	1	1	0	1	2	0	0	0	0	0	0	0	0	0	0	0	0	0	0	0	0	0	0	0	0	0	0	0	0	D_0__Bacteria;D_1__Acidobacteria;D_2__Acidobacteriia;D_3__Solibacterales;D_4__Solibacteraceae (Subgroup 3);D_5__Candidatus Solibacter;D_6__bacterium Ellin7504
7a6183a8c37a4b1769ab00cb2b6731ed	2	0	0	0	0	0	0	0	0	0	0	0	0	0	0	0	0	0	0	0	0	0	0	0	0	0	0	2	0	0	2	0	0	1	0	0	D_0__Bacteria;D_1__Planctomycetes;D_2__Phycisphaerae;D_3__Tepidisphaerales;D_4__WD2101 soil group
46c462ab35949faf535f119db5377eed	0	0	1	0	1	0	0	0	0	0	0	0	0	0	0	0	0	2	2	0	0	0	0	0	0	0	0	0	0	0	0	0	0	0	0	0	D_0__Bacteria;D_1__Proteobacteria;D_2__Gammaproteobacteria;D_3__Betaproteobacteriales;D_4__Nitrosomonadaceae;D_5__MND1;D_6__uncultured Nitrosomonadales bacterium
c5d3f7feb8255214e639fb75cd0206fb	2	2	6	5	3	0	3	0	0	1	0	2	5	1	0	2	0	0	6	4	2	8	0	0	0	1	10	5	3	2	4	11	7	0	1	4	D_0__Bacteria;D_1__Acidobacteria;D_2__Blastocatellia (Subgroup 4);D_3__11-24;D_4__uncultivated soil bacterium clone S111;D_5__uncultivated soil bacterium clone S111;D_6__uncultivated soil bacterium clone S111
54544756742577adbf2bae82c45dfe00	0	0	0	0	0	0	12	0	0	1	0	5	0	0	0	0	0	0	0	0	0	0	0	0	0	0	0	0	0	0	0	0	0	0	0	0	D_0__Bacteria;D_1__Proteobacteria;D_2__Gammaproteobacteria;D_3__Cellvibrionales;D_4__Cellvibrionaceae;D_5__Cellvibrio
2496de2939551d85d39999df1cde661e	0	0	0	0	0	0	0	2	0	0	0	0	0	0	0	0	2	0	4	0	0	1	0	0	0	4	0	0	0	0	0	0	0	0	0	0	D_0__Bacteria;D_1__Bacteroidetes;D_2__Bacteroidia;D_3__Sphingobacteriales;D_4__Sphingobacteriaceae
d67e894cfc8c2144092f4d910b1ae88d	0	0	0	0	0	0	0	0	0	0	0	0	0	0	0	0	0	0	0	0	0	0	0	0	0	0	2	2	0	2	0	0	0	0	0	0	D_0__Bacteria;D_1__Acidobacteria;D_2__Acidobacteriia;D_3__Solibacterales;D_4__Solibacteraceae (Subgroup 3);D_5__Bryobacter
78f8aa10dce10cf757d17651a5c21f53	1	0	0	0	0	0	2	0	0	0	0	0	0	0	0	0	0	0	0	4	0	2	0	0	1	0	0	2	0	0	0	0	0	0	0	0	D_0__Bacteria;D_1__Chloroflexi;D_2__Gitt-GS-136;D_3__uncultured Caldilinea sp.;D_4__uncultured Caldilinea sp.;D_5__uncultured Caldilinea sp.;D_6__uncultured Caldilinea sp.
2b00f8a9bf96ae1246b222692199b639	0	0	2	0	0	3	0	0	0	0	0	0	0	0	0	0	0	0	0	0	0	0	0	0	0	0	0	0	0	0	0	0	2	2	1	0	D_0__Bacteria;D_1__Acidobacteria;D_2__Blastocatellia (Subgroup 4);D_3__11-24;D_4__uncultured Acidobacterium sp.;D_5__uncultured Acidobacterium sp.;D_6__uncultured Acidobacterium sp.
8b66e2814e52a0c0621962c9927e25ce	0	0	0	0	0	0	1	1	4	0	0	0	0	0	0	0	0	0	0	0	0	0	0	0	0	0	0	0	0	0	4	0	0	0	0	0	D_0__Bacteria;D_1__Nitrospirae;D_2__Nitrospira;D_3__Nitrospirales;D_4__Nitrospiraceae;D_5__Nitrospira;D_6__Candidatus Nitrospira inopinata
078f74f4d504823310dd3de3e15a8af4	0	0	0	1	0	0	0	0	0	0	0	0	0	0	0	1	0	0	0	0	0	0	0	0	0	0	0	0	0	3	0	0	0	1	0	0	D_0__Bacteria;D_1__Bacteroidetes;D_2__Bacteroidia;D_3__Chitinophagales;D_4__Saprospiraceae;D_5__Phaeodactylibacter;D_6__uncultured Haliscomenobacter sp.
380aac384fbd2c141be25595c71b2a15	1	1	0	2	2	0	5	2	0	1	3	5	1	0	0	0	0	0	0	0	0	0	0	0	0	0	0	0	0	0	3	2	1	2	2	0	D_0__Bacteria;D_1__Chloroflexi;D_2__Dehalococcoidia;D_3__S085;D_4__uncultured bacterium 5G4;D_5__uncultured bacterium 5G4;D_6__uncultured bacterium 5G4
bf542080e909190f819867e2700eb95d	1	0	0	0	0	0	0	0	0	0	0	0	0	0	0	0	0	2	0	0	1	0	0	0	0	0	1	0	0	0	0	0	0	0	0	0	D_0__Bacteria;D_1__Bacteroidetes;D_2__Bacteroidia;D_3__Sphingobacteriales
a3857fe868626973dcab8bba27c50999	1	0	2	0	0	0	1	0	1	0	0	0	0	1	2	0	0	3	0	0	5	0	0	0	1	2	0	1	0	0	0	1	0	0	1	0	D_0__Bacteria;D_1__Proteobacteria;D_2__Alphaproteobacteria;D_3__Caulobacterales;D_4__Caulobacteraceae;D_5__Phenylobacterium
19d69a827a8e4323bf976fb3d106ca22	2	5	4	0	4	0	0	3	3	1	0	0	2	3	0	0	0	0	0	0	0	0	0	0	0	0	2	0	0	0	3	6	2	5	6	3	D_0__Bacteria;D_1__Verrucomicrobia;D_2__Verrucomicrobiae;D_3__Pedosphaerales;D_4__Pedosphaeraceae;D_5__ADurb.Bin063-1
48e35ffa46799e088e9c7602154756ee	0	0	0	1	1	0	0	0	0	2	0	0	1	0	0	0	0	0	0	0	0	0	0	0	0	0	0	0	0	0	0	1	0	0	0	0	D_0__Bacteria;D_1__Verrucomicrobia;D_2__Verrucomicrobiae;D_3__Pedosphaerales;D_4__Pedosphaeraceae;D_5__ADurb.Bin063-1
4da8e09770b452f9d544e971d2fae903	2	1	3	5	3	0	4	6	4	2	4	3	0	2	0	1	0	2	1	0	5	0	3	4	1	0	0	2	3	2	1	0	1	0	2	3	D_0__Bacteria;D_1__Actinobacteria;D_2__Thermoleophilia;D_3__Gaiellales;D_4__uncultured;D_5__bacterium Ellin6515;D_6__bacterium Ellin6515
d20d254d72361449a950ab41f3e03f78	2	0	0	0	0	0	0	0	0	0	0	0	0	1	0	0	0	0	0	0	0	0	0	0	0	0	0	0	0	0	0	3	0	2	0	3	D_0__Bacteria;D_1__Acidobacteria;D_2__Holophagae;D_3__Subgroup 7;D_4__uncultured Desulfovirga sp.;D_5__uncultured Desulfovirga sp.;D_6__uncultured Desulfovirga sp.
3b59b1459358375ebdb671227854cc00	1	0	0	0	0	0	2	0	0	1	2	0	0	0	0	0	0	0	0	0	2	0	0	0	0	0	1	0	0	0	0	3	0	1	0	4	D_0__Bacteria;D_1__Proteobacteria;D_2__Deltaproteobacteria
d45cebbdce716fd737a589da2c5a5bb8	0	0	0	0	0	0	0	0	0	0	0	0	0	0	0	0	0	2	0	0	0	2	0	2	2	2	3	0	0	0	0	0	0	0	0	0	D_0__Bacteria;D_1__Proteobacteria;D_2__Gammaproteobacteria;D_3__Legionellales;D_4__Legionellaceae;D_5__Legionella
3046dcdcf1b485deed86234d07bb2a92	0	0	0	0	0	0	0	0	1	0	0	0	0	0	0	0	0	0	0	0	0	0	0	0	0	0	0	1	0	0	0	1	0	0	0	0	D_0__Bacteria;D_1__Proteobacteria;D_2__Gammaproteobacteria;D_3__R7C24;D_4__uncultured soil bacterium;D_5__uncultured soil bacterium;D_6__uncultured soil bacterium
70765f65c818139bc5268742bf990996	5	5	11	5	9	2	4	7	8	14	13	14	12	2	6	1	8	5	23	4	13	18	6	6	4	3	1	5	0	3	10	13	8	11	11	13	D_0__Bacteria;D_1__Acidobacteria;D_2__Subgroup 6
64730870d65049c78b124aa598d36805	1	1	0	4	1	2	0	4	0	5	3	2	0	2	3	0	3	2	0	6	1	4	3	0	0	0	1	0	2	0	6	0	0	4	4	2	D_0__Bacteria;D_1__Proteobacteria;D_2__Alphaproteobacteria;D_3__Elsterales;D_4__uncultured
ebd04edd785d96fd4a967906fa4d7322	0	1	0	0	0	0	0	0	0	0	0	0	0	0	0	0	0	0	0	0	0	0	0	0	0	1	2	2	0	0	0	0	0	1	0	0	D_0__Bacteria;D_1__Proteobacteria;D_2__Deltaproteobacteria;D_3__SAR324 clade(Marine group B);D_4__Candidatus Nitrosoarchaeum limnia SFB1;D_5__Candidatus Nitrosoarchaeum limnia SFB1;D_6__Candidatus Nitrosoarchaeum limnia SFB1
f71a5c3993a18388a5d77faabfbdb73f	0	0	0	0	0	0	0	0	0	0	0	0	0	3	0	0	0	0	0	1	0	0	0	0	0	0	0	0	0	0	0	2	0	0	0	0	D_0__Bacteria;D_1__Actinobacteria;D_2__Actinobacteria;D_3__Streptomycetales;D_4__Streptomycetaceae;D_5__Streptomyces
4e3b281d9b6069c716d9913f7f348d12	1	2	2	0	0	0	0	0	0	0	0	0	0	0	0	0	0	0	0	0	2	0	0	0	0	0	0	0	0	0	0	1	2	0	0	0	D_0__Bacteria;D_1__Proteobacteria;D_2__Deltaproteobacteria;D_3__Myxococcales;D_4__Haliangiaceae;D_5__Haliangium
4a35af34421004c4744bdb75394c789e	1	0	0	0	0	1	0	0	0	0	0	0	0	0	0	0	0	0	2	0	0	0	0	2	0	1	0	0	0	0	0	0	0	0	0	0	D_0__Bacteria;D_1__Actinobacteria;D_2__Acidimicrobiia;D_3__IMCC26256;D_4__uncultured organism;D_5__uncultured organism;D_6__uncultured organism
26006a20782ecb3401ff06dae2ad9b20	0	0	0	0	0	2	0	0	0	0	2	0	0	0	0	0	0	0	0	0	0	0	0	0	0	0	0	0	0	0	1	0	0	0	0	0	D_0__Bacteria;D_1__Chloroflexi;D_2__OLB14
21b74faf9813e3a53a40dcf5f9f9f2d5	0	0	0	1	0	0	0	0	0	0	0	0	0	0	0	1	2	0	0	2	0	1	0	0	0	0	0	0	0	0	0	0	0	0	0	0	D_0__Bacteria;D_1__Proteobacteria;D_2__Gammaproteobacteria;D_3__Gammaproteobacteria Incertae Sedis;D_4__Unknown Family;D_5__Acidibacter;D_6__uncultured Steroidobacter sp.
db1f699ba8cf5075c3e8ef225d753c55	0	0	5	0	3	0	0	0	0	2	0	0	0	2	0	0	0	0	0	1	0	0	0	0	0	1	0	0	0	0	0	0	0	0	3	2	D_0__Bacteria;D_1__Proteobacteria;D_2__Deltaproteobacteria;D_3__Myxococcales;D_4__Haliangiaceae;D_5__Haliangium;D_6__uncultured proteobacterium
4587a8ae35436b82b981429529ae3ccb	2	0	3	0	0	2	0	0	0	1	0	0	0	0	0	0	0	0	0	0	0	0	0	0	0	0	0	0	0	0	0	0	0	0	0	0	D_0__Bacteria;D_1__Acidobacteria;D_2__Acidobacteriia;D_3__Solibacterales;D_4__Solibacteraceae (Subgroup 3)
d3db2816b3a3f153aa0c2334491d5ed6	0	0	0	0	0	0	3	1	1	0	0	0	0	0	0	0	0	0	0	0	1	2	3	0	0	0	0	2	0	0	1	2	0	3	1	1	D_0__Bacteria;D_1__Proteobacteria;D_2__Deltaproteobacteria;D_3__Desulfarculales;D_4__Desulfarculaceae;D_5__uncultured
4b337e844a3eb204f61265d1fb357fd4	0	0	0	0	0	1	0	1	0	0	0	0	2	2	0	0	0	5	0	1	0	0	0	1	0	0	0	0	0	4	0	0	0	0	0	0	D_0__Bacteria;D_1__Chloroflexi;D_2__Anaerolineae;D_3__Caldilineales;D_4__Caldilineaceae;D_5__uncultured;D_6__uncultured Caldilineales bacterium
22fafb7aa411e469d81cbe125462cdc9	0	2	0	0	5	0	0	0	0	0	0	0	2	0	0	3	3	0	0	3	0	1	0	0	0	0	0	0	0	0	1	1	0	0	4	0	D_0__Bacteria;D_1__Acidobacteria;D_2__Acidobacteriia;D_3__Acidobacteriales;D_4__uncultured
15f3d54e68b271bae4d760a9af81e13b	3	0	0	2	3	2	2	1	0	0	3	3	0	0	0	0	0	2	0	0	0	0	2	0	0	0	0	0	0	0	1	1	0	4	0	1	D_0__Bacteria;D_1__Proteobacteria;D_2__Gammaproteobacteria;D_3__Betaproteobacteriales;D_4__Burkholderiaceae
dc5eee8b46804d74648626fc53f3e47a	0	1	0	0	0	0	0	1	0	0	0	0	2	0	0	0	0	0	0	0	0	0	0	0	0	1	0	0	0	0	0	0	0	0	0	0	D_0__Bacteria;D_1__Chloroflexi;D_2__Anaerolineae;D_3__SBR1031;D_4__A4b;D_5__wastewater metagenome;D_6__wastewater metagenome
b552bb27ccdccad74ffb909c79aca7b3	3	0	1	0	4	4	3	2	4	4	4	8	2	2	1	3	2	1	6	2	0	1	0	2	1	2	1	1	3	7	11	1	5	6	1	3	D_0__Bacteria;D_1__Proteobacteria;D_2__Alphaproteobacteria;D_3__Acetobacterales;D_4__Acetobacteraceae
9c4d11f2d1cb1c629126f45c8d75dd54	0	0	0	0	0	0	0	0	0	0	0	0	0	0	0	0	0	0	0	0	0	0	0	2	0	0	0	0	0	0	0	0	0	2	0	0	D_0__Bacteria;D_1__Proteobacteria;D_2__Deltaproteobacteria;D_3__Desulfuromonadales
6f24cb3bc26453d82b612cd6ada8fff8	0	0	1	0	0	0	2	0	0	0	0	0	0	0	0	0	0	1	0	0	0	0	0	2	0	1	0	0	0	0	0	1	0	0	2	0	D_0__Bacteria;D_1__Proteobacteria;D_2__Gammaproteobacteria;D_3__Betaproteobacteriales;D_4__SC-I-84
90c559f6ed0abed752137c60a2cab9d4	2	0	0	0	0	0	0	1	3	1	2	0	0	0	0	2	3	1	0	3	0	0	0	0	0	0	0	0	0	2	0	0	0	0	0	0	D_0__Bacteria;D_1__Proteobacteria;D_2__Alphaproteobacteria;D_3__Acetobacterales;D_4__Acetobacteraceae;D_5__uncultured;D_6__uncultured bacterium DA007
1db9f2a1c538d241566acaf0a6d094d1	4	0	4	0	0	4	5	1	1	0	5	0	0	13	1	1	8	4	14	4	16	3	6	2	3	4	9	2	4	2	1	0	4	5	4	1	D_0__Bacteria;D_1__Proteobacteria;D_2__Alphaproteobacteria;D_3__Rhizobiales;D_4__Xanthobacteraceae
770285fc6506cf1abaef34b04498ffc7	0	0	0	0	0	0	0	0	0	0	0	0	0	0	0	0	0	0	0	0	1	0	0	1	0	3	1	1	0	0	0	0	0	0	0	0	D_0__Bacteria;D_1__Proteobacteria;D_2__Alphaproteobacteria;D_3__Dongiales;D_4__Dongiaceae;D_5__Dongia
337a18fc0bfd6877c3275cdc54fe22a4	5	3	7	5	4	3	5	2	2	15	12	5	4	3	0	2	0	5	4	0	7	12	1	1	3	3	9	2	0	0	11	7	5	14	3	6	D_0__Bacteria;D_1__Acidobacteria;D_2__Subgroup 6
3cb1490dea89b44126a0088588e250dd	2	0	0	2	0	0	0	0	2	1	1	3	0	2	2	0	0	2	2	0	0	0	0	0	0	0	0	0	0	2	1	0	0	0	0	1	D_0__Bacteria;D_1__Actinobacteria;D_2__Acidimicrobiia;D_3__IMCC26256;D_4__uncultured organism;D_5__uncultured organism;D_6__uncultured organism
866d466d3a703ad9b2b1f4b75ea28c2e	0	0	0	5	1	1	0	0	0	0	1	0	0	0	0	0	2	0	2	0	0	0	0	0	0	0	0	0	2	0	0	1	0	0	1	0	D_0__Bacteria;D_1__Proteobacteria;D_2__Gammaproteobacteria;D_3__Betaproteobacteriales;D_4__Burkholderiaceae;D_5__Cupriavidus
3355a2e204b41481f35dd475338628f8	0	0	0	0	0	0	0	0	0	0	0	0	0	2	0	0	0	0	0	1	0	0	0	0	0	0	0	0	1	0	1	0	0	0	0	0	D_0__Bacteria;D_1__Firmicutes;D_2__Clostridia;D_3__Clostridiales;D_4__Clostridiaceae 1;D_5__Clostridium sensu stricto 1
f70ed8780f8a68a0084bd406cb1c37e5	0	0	0	0	0	0	0	4	0	0	0	0	0	1	0	1	0	0	0	2	0	0	0	0	0	0	0	0	0	0	0	0	0	0	0	0	D_0__Archaea;D_1__Thaumarchaeota;D_2__Nitrososphaeria;D_3__Nitrososphaerales;D_4__Nitrososphaeraceae
c23155e2c137085734a3ffcf923724cc	0	2	0	0	1	1	0	0	4	1	2	2	0	0	0	3	0	0	1	1	0	3	0	1	0	0	0	0	0	0	0	0	0	2	0	0	D_0__Bacteria;D_1__Acidobacteria;D_2__Acidobacteriia;D_3__Acidobacteriales;D_4__uncultured
cf28c7436ecc38646403786e6908ba09	0	1	0	0	0	1	0	0	0	0	0	0	0	0	0	0	0	0	0	1	0	0	0	0	0	0	0	0	0	0	0	2	0	0	0	0	D_0__Bacteria;D_1__Proteobacteria;D_2__Gammaproteobacteria;D_3__Betaproteobacteriales;D_4__Burkholderiaceae
f849a20d45b3636732f7edc371022b34	0	0	0	0	1	2	0	0	0	0	0	0	0	0	0	0	0	0	0	0	1	0	2	0	0	0	0	0	0	0	1	0	0	0	0	0	D_0__Bacteria;D_1__Actinobacteria;D_2__Actinobacteria;D_3__Propionibacteriales;D_4__Nocardioidaceae;D_5__Nocardioides
bee97b3880b29e63d488698f23d01a1a	0	0	0	0	0	0	0	0	0	0	0	0	1	4	4	1	0	1	9	0	4	0	7	4	4	8	9	0	3	2	0	0	0	0	0	0	D_0__Bacteria;D_1__Proteobacteria;D_2__Alphaproteobacteria;D_3__Rhizobiales;D_4__Xanthobacteraceae;D_5__Pseudolabrys;D_6__uncultured Caulobacterales bacterium
c58b8855aa6c3bf83782b54fd09ec586	0	4	0	0	2	2	2	5	2	4	1	5	0	0	2	0	3	0	0	4	2	3	3	1	1	2	1	2	2	3	0	4	8	8	4	4	D_0__Bacteria;D_1__Proteobacteria;D_2__Gammaproteobacteria
d22e7979c884745e93ef0ee61ee0cedd	0	0	4	0	2	1	0	0	0	0	1	1	0	0	0	0	0	0	0	0	0	1	0	0	0	0	0	0	0	0	0	0	1	0	0	0	D_0__Bacteria;D_1__Nitrospirae;D_2__Nitrospira;D_3__Nitrospirales;D_4__Nitrospiraceae;D_5__Nitrospira;D_6__uncultured Green Bay ferromanganous micronodule bacterium MNB2
f9191d661f6a87aa5b1fddc188fe0620	0	0	0	1	0	0	0	0	0	1	0	0	1	0	0	1	0	0	1	0	0	0	0	0	1	0	0	0	0	1	1	0	0	0	0	1	D_0__Bacteria;D_1__Gemmatimonadetes;D_2__Gemmatimonadetes;D_3__Gemmatimonadales;D_4__Gemmatimonadaceae;D_5__uncultured;D_6__Gemmatimonadetes bacterium LP81
72e04290b031a02bbd0d5776860cf2a0	0	0	0	5	0	0	0	0	0	0	0	0	0	0	0	0	0	0	0	0	0	0	0	0	0	0	0	0	0	0	0	0	0	0	0	1	D_0__Bacteria;D_1__Proteobacteria;D_2__Deltaproteobacteria;D_3__Myxococcales
dd235b3cabf88b4a75034a21cd46624a	0	0	0	1	2	3	0	2	0	0	0	3	0	1	0	1	0	0	0	0	0	0	0	0	0	0	2	0	0	0	0	0	0	0	0	0	D_0__Bacteria;D_1__Bacteroidetes;D_2__Bacteroidia;D_3__Flavobacteriales;D_4__Flavobacteriaceae;D_5__Flavobacterium
3bdb5a1ec66c3c86880fa6ea8158a10b	0	0	0	0	6	0	0	2	0	0	0	0	2	0	0	0	0	0	0	0	0	0	0	0	0	0	0	0	0	0	0	2	1	0	1	3	D_0__Bacteria;D_1__Bacteroidetes;D_2__Bacteroidia;D_3__Flavobacteriales;D_4__Flavobacteriaceae;D_5__Flavobacterium
b50228165e1f62b7907d1dc3a5a4f113	0	0	0	0	0	0	0	0	0	0	0	0	0	0	1	0	0	0	0	0	0	0	0	1	0	1	0	1	0	0	0	0	0	0	0	0	D_0__Bacteria;D_1__Chloroflexi;D_2__KD4-96;D_3__uncultured Longilinea sp.;D_4__uncultured Longilinea sp.;D_5__uncultured Longilinea sp.;D_6__uncultured Longilinea sp.
197902a69ff0e55beaa6275733d6c16f	0	0	0	0	0	0	0	3	0	2	1	0	1	0	0	0	4	0	0	0	0	0	0	1	0	0	1	0	0	0	1	0	5	0	1	0	D_0__Bacteria;D_1__Proteobacteria;D_2__Gammaproteobacteria;D_3__Cellvibrionales;D_4__Cellvibrionaceae;D_5__Cellvibrio
ed819f7bd6c22979efc36ba7e81ad614	1	0	0	0	0	0	1	1	0	0	0	0	0	0	2	0	1	0	0	0	0	0	1	0	1	0	0	2	2	0	0	0	0	0	0	0	D_0__Bacteria;D_1__Proteobacteria;D_2__Alphaproteobacteria;D_3__Caulobacterales;D_4__Caulobacteraceae;D_5__Phenylobacterium;D_6__Caulobacter sp. H62
a1b25578fb54a51b967a835a99c5b988	0	0	0	0	0	0	0	0	0	0	0	0	1	1	2	0	0	0	0	0	0	0	3	0	0	1	0	0	0	0	0	0	0	0	0	2	D_0__Bacteria;D_1__Proteobacteria;D_2__Gammaproteobacteria;D_3__Betaproteobacteriales;D_4__SC-I-84
8df6e820e3365c8b2ce1fc3afc4bee1e	0	0	1	0	0	0	0	0	0	0	0	0	0	0	0	0	0	0	0	0	0	0	0	0	0	0	0	0	0	0	0	0	0	0	2	0	D_0__Bacteria;D_1__Bacteroidetes;D_2__Bacteroidia;D_3__Cytophagales;D_4__Microscillaceae;D_5__Chryseolinea
1d53a56d67d5382092f28953070b4dce	0	0	0	0	0	1	0	0	0	0	1	0	0	0	0	0	0	0	0	0	0	0	0	0	0	0	0	0	2	0	1	0	0	0	2	0	D_0__Bacteria;D_1__Proteobacteria;D_2__Gammaproteobacteria;D_3__Xanthomonadales;D_4__Xanthomonadaceae;D_5__Arenimonas;D_6__Arenimonas daechungensis
32069ddc68893a9e7eecdb94c2fb1733	1	0	0	0	0	0	0	0	0	0	0	0	0	0	0	0	0	0	0	0	0	0	0	0	0	0	0	0	0	0	0	1	1	0	2	0	D_0__Bacteria;D_1__Proteobacteria;D_2__Gammaproteobacteria;D_3__Betaproteobacteriales;D_4__Burkholderiaceae;D_5__uncultured;D_6__Burkholderiales bacterium X4
cb749cb8670e0b43fe2245b9c28322b9	1	0	0	0	1	0	0	0	0	0	1	0	0	0	0	0	0	1	0	0	0	0	0	0	1	0	0	0	0	0	0	0	0	1	1	0	D_0__Bacteria;D_1__Acidobacteria;D_2__Subgroup 6
42195d35f59a6fdba1e2941a8bda7d02	0	0	0	0	0	0	0	0	1	0	0	0	2	1	0	1	3	0	3	2	2	0	4	0	4	1	2	3	3	4	0	0	0	0	0	0	D_0__Bacteria;D_1__Acidobacteria;D_2__Acidobacteriia;D_3__Solibacterales;D_4__Solibacteraceae (Subgroup 3);D_5__Candidatus Solibacter
8dd85f146228eca3941dab96fab4fb35	0	0	0	0	0	0	0	0	0	0	0	0	0	0	0	0	0	0	0	0	0	0	0	0	2	0	0	0	0	0	0	0	0	0	0	0	D_0__Bacteria;D_1__Gemmatimonadetes;D_2__Gemmatimonadetes;D_3__Gemmatimonadales;D_4__Gemmatimonadaceae;D_5__Gemmatimonas
4e1c5244e47f1229b1cf4f5e580745d1	0	0	0	0	0	0	1	0	2	1	0	0	0	0	0	0	0	0	0	4	0	0	0	0	0	0	3	0	0	0	0	0	0	0	0	0	D_0__Bacteria;D_1__Verrucomicrobia;D_2__Verrucomicrobiae;D_3__Pedosphaerales;D_4__Pedosphaeraceae;D_5__ADurb.Bin063-1
81dc93ee752caa53ba4bcf44f964596e	0	0	0	0	0	0	0	1	0	0	0	0	0	0	0	0	0	0	0	0	0	0	3	0	0	0	0	0	0	0	0	0	0	0	1	0	D_0__Bacteria;D_1__Bacteroidetes;D_2__Bacteroidia;D_3__Chitinophagales;D_4__Chitinophagaceae
1581f680df70fbc15d3e59b77d5481cb	0	0	0	4	0	0	0	0	0	0	0	0	0	0	0	0	0	0	0	0	0	0	0	0	0	0	0	0	0	1	4	1	5	0	5	7	D_0__Bacteria;D_1__Proteobacteria;D_2__Deltaproteobacteria;D_3__Myxococcales;D_4__Archangiaceae;D_5__Anaeromyxobacter
f814b080486b012b6ef3ab479cfacc98	0	2	0	0	0	0	0	0	1	0	1	0	0	0	0	0	0	0	0	0	0	1	0	0	1	0	0	0	0	0	0	0	0	0	0	0	D_0__Bacteria;D_1__Actinobacteria;D_2__Actinobacteria
8904440794c2ef62bf809f3401f52ad0	0	0	0	0	0	0	3	0	0	0	0	0	0	0	0	0	0	0	0	0	0	0	0	0	0	0	0	0	0	0	0	0	0	0	1	0	D_0__Bacteria;D_1__Proteobacteria;D_2__Deltaproteobacteria;D_3__Myxococcales;D_4__Haliangiaceae;D_5__Haliangium;D_6__myxobacterium AT3-03
e8289ed34a75e965a14fcc5a92556b19	0	0	0	0	0	0	0	0	0	0	0	0	1	0	2	1	0	0	0	0	0	0	0	0	1	0	0	3	0	1	0	0	0	0	0	0	D_0__Bacteria;D_1__Proteobacteria;D_2__Alphaproteobacteria;D_3__Rhizobiales;D_4__Xanthobacteraceae
4e3b821985bd01d63aa5dfd061dae0b8	0	0	0	0	0	0	0	0	0	0	0	0	0	0	0	0	0	0	0	0	0	0	0	0	0	7	0	3	0	0	0	0	0	0	0	0	D_0__Bacteria;D_1__Proteobacteria;D_2__Gammaproteobacteria;D_3__Xanthomonadales;D_4__Xanthomonadaceae;D_5__uncultured
6f1c361133fcb9b195d9bbe213373c79	2	0	2	0	0	0	1	0	0	0	2	0	0	0	0	0	0	0	0	0	0	0	0	0	0	0	0	0	1	0	0	2	1	0	0	0	D_0__Bacteria;D_1__Proteobacteria;D_2__Deltaproteobacteria;D_3__Myxococcales
8beaddb11e417bb77887252e64b17c0b	0	2	0	0	0	1	0	0	0	0	0	0	0	0	0	0	0	0	0	0	0	0	0	0	0	0	0	0	0	0	2	1	0	0	1	0	D_0__Bacteria;D_1__Acidobacteria;D_2__Subgroup 6
905881555faa00b5d5d34768050fa07c	21	37	45	34	29	42	54	32	34	25	40	41	16	12	23	3	9	46	25	2	16	32	7	30	8	11	12	13	8	22	19	25	19	26	18	20	D_0__Bacteria;D_1__Bacteroidetes;D_2__Bacteroidia;D_3__Chitinophagales;D_4__Chitinophagaceae
44211f4486351328897b22e1959bee08	0	0	0	0	0	0	0	2	1	0	2	0	0	0	0	0	0	0	0	0	0	0	0	0	0	0	0	0	0	0	0	0	0	0	0	0	D_0__Bacteria;D_1__Proteobacteria;D_2__Gammaproteobacteria;D_3__Betaproteobacteriales;D_4__Burkholderiaceae;D_5__Cupriavidus
9c39552e5d848d152f6a12a734781c61	0	0	0	1	0	1	0	1	0	0	0	0	0	0	0	0	0	0	0	0	0	0	0	0	0	0	0	0	0	0	0	0	1	0	0	0	D_0__Bacteria;D_1__Proteobacteria;D_2__Deltaproteobacteria;D_3__Myxococcales;D_4__Sandaracinaceae;D_5__uncultured;D_6__uncultured marine bacterium
668878d468209db697292ac812530b2c	2	0	0	0	0	0	0	0	0	0	3	0	0	0	0	2	0	0	0	0	0	0	0	0	0	0	0	0	2	3	0	0	0	0	0	0	D_0__Bacteria;D_1__Proteobacteria;D_2__Deltaproteobacteria;D_3__Myxococcales;D_4__BIrii41
d5d4e43e2b40032e82d01f9a2ac8837d	0	0	0	0	0	0	0	0	0	1	0	0	0	0	0	0	0	0	0	0	1	0	0	0	0	3	0	0	0	1	0	0	0	0	0	0	D_0__Bacteria;D_1__Proteobacteria;D_2__Gammaproteobacteria
f4d9dea0c4b73305b309669059c8cc46	0	0	1	2	0	0	0	0	2	1	1	0	0	0	0	0	0	0	0	0	0	0	0	0	0	0	0	0	0	0	0	0	0	0	0	0	D_0__Bacteria;D_1__Proteobacteria;D_2__Gammaproteobacteria;D_3__Xanthomonadales;D_4__Xanthomonadaceae;D_5__Arenimonas;D_6__Arenimonas daechungensis
5e72aaa2ce144ca7578023fc3158b699	0	2	0	0	2	0	1	1	0	3	2	1	0	0	0	1	0	0	2	3	0	0	0	0	1	0	0	2	0	0	1	1	0	1	0	1	D_0__Bacteria;D_1__Firmicutes;D_2__Bacilli;D_3__Bacillales;D_4__Bacillaceae;D_5__Bacillus
9067942df39dc4cff6648b0b0d47fcaa	2	1	1	0	0	1	3	1	1	3	2	0	8	4	6	2	7	8	9	0	3	0	0	1	3	7	7	3	2	8	2	3	0	1	3	0	D_0__Bacteria;D_1__Bacteroidetes;D_2__Bacteroidia;D_3__Chitinophagales;D_4__Chitinophagaceae;D_5__Flavisolibacter;D_6__Flavisolibacter ginsengiterrae
a662b020eef3f0af9d31b3a37abc5433	0	0	0	0	0	0	2	0	0	0	0	0	0	0	0	0	0	0	0	0	2	0	0	0	1	0	0	0	0	0	0	0	0	0	0	0	D_0__Bacteria;D_1__Bacteroidetes;D_2__Bacteroidia;D_3__Sphingobacteriales
cfa8f7f6e564be34b985b7e2ffd46024	1	1	0	0	0	0	0	0	0	0	0	0	0	0	0	0	0	0	0	0	0	0	0	0	0	0	0	0	0	0	0	0	0	0	1	0	D_0__Bacteria;D_1__Actinobacteria;D_2__Acidimicrobiia;D_3__Microtrichales;D_4__Ilumatobacteraceae;D_5__uncultured;D_6__uncultured Acidimicrobiales bacterium
3cee8b3b0cc3113d2d5fcf3f108b8ad6	0	0	0	0	0	0	0	0	0	0	0	0	0	3	0	0	0	0	1	1	0	0	0	0	0	0	2	0	0	3	0	0	0	0	0	0	D_0__Archaea;D_1__Thaumarchaeota;D_2__Nitrososphaeria;D_3__Nitrosotaleales;D_4__Nitrosotaleaceae;D_5__Candidatus Nitrosotalea;D_6__Candidatus Nitrosotalea devanaterra
40d44f78a053b95914062b7f870e5c9c	0	0	0	1	0	0	0	2	2	0	0	0	0	0	0	0	0	0	0	0	0	0	0	0	0	0	4	0	0	0	1	0	0	0	2	0	D_0__Bacteria;D_1__Acidobacteria;D_2__Acidobacteriia;D_3__Acidobacteriales;D_4__Koribacteraceae;D_5__Candidatus Koribacter
926f00c2036ebb7d1a7ac2d8b9c4dc10	0	0	0	1	0	0	0	0	0	0	0	0	0	0	0	0	0	0	0	0	0	0	0	0	0	0	0	0	0	0	0	0	0	0	0	1	D_0__Bacteria;D_1__Patescibacteria;D_2__Saccharimonadia;D_3__Saccharimonadales
408f863b29f1f74942b29b15e1e4d4a1	0	0	0	0	0	0	0	0	0	0	0	0	1	1	0	0	0	4	0	0	0	0	2	0	0	0	2	0	0	0	0	0	0	0	0	0	D_0__Bacteria;D_1__Gemmatimonadetes;D_2__Gemmatimonadetes;D_3__Gemmatimonadales;D_4__Gemmatimonadaceae;D_5__Gemmatimonas
f1d516a768aa3c5186eb9b7258d7a231	0	0	0	0	0	0	0	0	0	0	0	0	0	0	0	0	0	0	0	3	0	1	0	0	0	0	0	0	0	1	0	0	0	0	0	0	D_0__Bacteria;D_1__WS2;D_2__uncultured Firmicutes bacterium;D_3__uncultured Firmicutes bacterium;D_4__uncultured Firmicutes bacterium;D_5__uncultured Firmicutes bacterium;D_6__uncultured Firmicutes bacterium
eecdfe889f9e9a4dbb28cfbbdef1cf63	0	0	2	0	3	0	3	0	0	0	0	0	0	0	0	0	0	0	2	0	0	0	0	0	0	0	0	0	0	0	1	3	7	2	0	0	D_0__Bacteria;D_1__Proteobacteria;D_2__Gammaproteobacteria;D_3__Xanthomonadales;D_4__Xanthomonadaceae
e69ef3ee86d95a4c35359f4617940d7d	0	0	0	0	0	0	0	0	0	0	0	0	0	0	0	0	0	0	0	0	0	0	1	0	1	3	0	2	0	2	0	0	0	0	0	0	D_0__Bacteria;D_1__Proteobacteria;D_2__Alphaproteobacteria;D_3__Sphingomonadales;D_4__Sphingomonadaceae;D_5__Sphingomonas
e63c3a12505c42ac2069f60261b9fe62	1	0	1	1	1	0	0	2	7	1	1	0	1	2	2	0	0	0	0	0	0	0	0	0	1	0	0	0	2	0	3	0	1	0	0	0	D_0__Bacteria;D_1__Gemmatimonadetes;D_2__Gemmatimonadetes;D_3__Gemmatimonadales;D_4__Gemmatimonadaceae;D_5__uncultured;D_6__Gemmatimonadetes bacterium LP81
56aff400676151b3b75201d5b273c420	0	0	1	0	0	0	1	0	0	0	0	0	0	0	0	0	0	0	0	0	0	0	0	0	0	0	0	0	0	0	0	0	0	0	0	4	D_0__Bacteria;D_1__Bacteroidetes;D_2__Bacteroidia;D_3__Chitinophagales;D_4__Chitinophagaceae;D_5__Parafilimonas;D_6__uncultured Bacteroidetes bacterium
4b776269a19f259a35239936423dc4fd	4	2	1	4	6	5	12	9	8	4	12	4	3	6	4	3	5	6	9	0	7	3	5	2	0	9	6	2	4	4	3	6	12	5	1	4	D_0__Bacteria;D_1__Actinobacteria
7ecbcc4edad6e92b2d90a6b85df6a00c	1	0	0	1	0	0	0	0	0	0	2	3	1	0	2	0	0	0	0	0	1	1	0	0	0	0	0	0	0	1	5	1	10	6	11	1	D_0__Bacteria
3491f02e333767deac77134de94131ca	0	1	0	1	0	1	0	0	0	0	1	0	0	0	0	0	0	0	0	0	0	1	0	0	0	0	0	0	0	0	0	0	0	0	0	0	D_0__Bacteria;D_1__Actinobacteria;D_2__Thermoleophilia;D_3__Gaiellales;D_4__uncultured;D_5__bacterium Ellin7530;D_6__bacterium Ellin7530
6f3b6785541f512731e84b4b1313eb1e	0	0	2	0	0	0	1	0	0	4	1	0	4	1	3	0	0	4	5	0	4	5	0	0	0	0	0	2	0	0	1	3	0	2	1	0	D_0__Bacteria;D_1__Proteobacteria;D_2__Gammaproteobacteria;D_3__Betaproteobacteriales;D_4__Nitrosomonadaceae;D_5__MND1
c8b8a8ff6d2784a8b6c58c319afab0ef	0	0	0	0	0	0	0	0	0	1	0	0	0	0	0	0	0	0	2	4	2	0	4	1	0	0	0	0	0	0	0	0	0	0	0	0	D_0__Bacteria;D_1__Gemmatimonadetes;D_2__Gemmatimonadetes;D_3__Gemmatimonadales;D_4__Gemmatimonadaceae;D_5__Gemmatimonas
efdea642f7e30833bf7b742f0b590b05	0	0	0	0	0	0	0	0	1	1	0	0	0	0	0	0	0	0	0	0	0	0	0	0	0	0	1	0	0	0	2	0	0	0	2	0	D_0__Bacteria;D_1__Actinobacteria;D_2__Thermoleophilia;D_3__Gaiellales;D_4__Gaiellaceae;D_5__Gaiella;D_6__actinobacterium WWH12
b15a83fbd042ad6777d56567aa56a710	0	0	2	2	0	0	0	1	0	0	2	0	0	0	0	0	0	0	0	0	0	0	2	0	0	0	0	0	0	0	0	0	1	0	1	0	D_0__Bacteria;D_1__Actinobacteria;D_2__Thermoleophilia;D_3__Gaiellales;D_4__uncultured;D_5__bacterium Ellin6517;D_6__bacterium Ellin6517
00e6d51cc3d79f4a961f7fc57238ebe3	0	2	0	0	0	0	0	1	1	0	0	0	1	0	0	0	0	0	0	1	0	0	2	0	0	0	1	2	0	0	1	0	0	0	0	0	D_0__Bacteria;D_1__Bacteroidetes;D_2__Bacteroidia;D_3__Chitinophagales;D_4__Chitinophagaceae
148eec5197862a3fb8deb915d031a656	3	1	1	3	2	7	2	0	4	1	2	2	0	1	2	0	0	5	0	0	0	0	5	0	1	0	0	0	0	3	1	2	8	2	2	0	D_0__Bacteria;D_1__Proteobacteria;D_2__Alphaproteobacteria;D_3__Reyranellales;D_4__Reyranellaceae;D_5__Reyranella
d5897052b264bff5f7dd0e4476fae810	0	0	0	0	2	0	0	2	0	1	0	0	0	2	0	0	0	0	1	0	2	0	0	0	3	0	0	4	0	2	0	0	1	0	0	1	D_0__Bacteria;D_1__Planctomycetes;D_2__Phycisphaerae;D_3__Tepidisphaerales;D_4__CPla-3 termite group
3171f43f4278f65810bac9a0cba4a4c9	2	0	2	0	3	2	1	2	0	2	2	0	0	1	0	0	0	0	0	0	0	1	0	0	0	0	0	0	0	0	0	1	0	2	1	2	D_0__Bacteria;D_1__Proteobacteria;D_2__Alphaproteobacteria;D_3__Elsterales;D_4__uncultured;D_5__uncultured proteobacterium;D_6__uncultured proteobacterium
1dd1f4c4374ed9d3106b7df37db2ec14	0	0	0	0	0	0	0	0	0	0	3	0	1	0	0	0	0	0	0	0	0	0	0	0	0	0	0	0	0	2	0	0	0	0	0	0	D_0__Bacteria;D_1__Proteobacteria;D_2__Alphaproteobacteria;D_3__Caulobacterales;D_4__Caulobacteraceae
f43936426e9eec42b2af345f4aac9eb6	0	0	0	2	0	0	0	0	0	0	0	0	0	0	0	0	12	0	0	0	0	0	0	0	0	0	0	0	2	0	0	0	0	0	0	0	D_0__Bacteria;D_1__Acidobacteria;D_2__Acidobacteriia;D_3__Acidobacteriales
1e9056e757ab7f3a05d727fe3381df17	1	0	2	0	0	0	4	0	0	0	0	0	0	0	0	0	0	0	0	2	0	0	0	0	0	0	0	0	0	0	0	0	0	0	0	0	D_0__Bacteria;D_1__Planctomycetes;D_2__Phycisphaerae;D_3__Tepidisphaerales;D_4__WD2101 soil group
d3b697fe0680b4294527f76afff104e7	3	7	3	3	2	4	10	0	0	2	2	1	1	0	1	0	0	2	0	0	1	1	2	0	1	4	2	0	1	0	0	0	3	0	0	0	D_0__Bacteria;D_1__Actinobacteria;D_2__Acidimicrobiia;D_3__IMCC26256;D_4__uncultured Ferrimicrobium sp.;D_5__uncultured Ferrimicrobium sp.;D_6__uncultured Ferrimicrobium sp.
ad4ee12f682d5730acc26938e8e50fba	0	1	0	0	0	0	0	1	0	0	1	0	0	0	0	0	0	0	0	1	0	0	0	0	0	0	0	0	0	0	1	0	0	0	0	0	D_0__Bacteria
0a24634c4023f9576d452a0e8ba63cea	0	0	0	0	0	0	0	0	0	0	0	0	1	0	0	0	0	0	0	0	0	0	0	0	0	0	2	0	0	0	0	0	0	0	1	0	D_0__Bacteria;D_1__Proteobacteria;D_2__Alphaproteobacteria;D_3__Acetobacterales;D_4__Acetobacteraceae;D_5__Rhodovastum;D_6__Acetobacteraceae bacterium LX45
11bcb2adfe016509a18bf5710f651c14	1	1	0	0	3	0	3	1	7	1	3	2	9	0	2	4	0	1	0	4	0	2	0	3	1	2	1	0	0	1	1	1	1	1	0	2	D_0__Bacteria;D_1__Acidobacteria;D_2__Subgroup 6
fc6bb78cbc9d1b9561e1a653ce78cc76	0	0	0	0	0	0	0	0	0	0	0	0	0	5	3	0	0	0	0	0	0	0	0	8	1	0	1	0	0	0	1	0	0	0	0	0	D_0__Bacteria;D_1__Proteobacteria;D_2__Alphaproteobacteria;D_3__Rhizobiales;D_4__Devosiaceae;D_5__Devosia
01d77ed7018e76a3e20b7569b40af853	2	0	0	2	0	0	0	2	6	0	7	2	0	0	0	0	0	0	0	0	0	0	0	0	0	0	3	0	0	0	2	0	0	0	4	0	D_0__Bacteria;D_1__Actinobacteria;D_2__Acidimicrobiia;D_3__Microtrichales;D_4__Ilumatobacteraceae
03dac3c10bc16dc5bf5966588b61975a	0	0	0	2	1	0	2	0	0	0	0	0	3	0	0	0	0	0	0	0	0	0	0	0	0	0	0	0	3	0	0	0	0	0	0	0	D_0__Bacteria;D_1__Actinobacteria;D_2__Thermoleophilia;D_3__Gaiellales;D_4__uncultured
7b372c671368773800f246dc889876f9	0	0	0	0	0	0	0	0	1	0	3	0	0	0	0	3	2	0	0	0	0	0	0	0	0	0	0	0	0	0	0	0	0	0	0	0	D_0__Bacteria;D_1__Proteobacteria;D_2__Alphaproteobacteria;D_3__Rhizobiales;D_4__Beijerinckiaceae
c2178398fb4241d6148b1777db752721	0	0	0	2	0	0	0	0	0	0	0	0	0	2	0	0	0	0	0	0	1	0	0	1	0	0	0	2	0	0	0	0	0	0	0	0	D_0__Bacteria;D_1__Proteobacteria;D_2__Gammaproteobacteria;D_3__Betaproteobacteriales;D_4__Burkholderiaceae;D_5__Cupriavidus
b50bb344f0bbc15c81e99d148c678041	0	0	0	0	0	0	0	0	0	0	0	0	0	0	0	0	3	0	0	0	0	0	0	0	1	0	0	0	0	0	0	0	0	0	0	0	D_0__Bacteria;D_1__Proteobacteria;D_2__Alphaproteobacteria;D_3__uncultured;D_4__uncultured Stella sp.;D_5__uncultured Stella sp.;D_6__uncultured Stella sp.
187023e37007ab5d80edb261c79244e4	0	0	0	0	0	0	0	0	0	0	0	0	0	0	0	0	0	0	0	0	2	2	2	2	0	0	0	0	0	0	0	0	0	0	0	0	D_0__Bacteria;D_1__Proteobacteria;D_2__Gammaproteobacteria;D_3__Betaproteobacteriales;D_4__SC-I-84
fd6c062945584f153a376a68b49c21f4	0	0	0	0	0	0	0	3	0	0	0	0	1	0	0	0	2	1	0	0	0	3	1	0	0	0	1	0	0	0	1	0	2	0	0	0	D_0__Bacteria;D_1__Gemmatimonadetes;D_2__Gemmatimonadetes;D_3__Gemmatimonadales;D_4__Gemmatimonadaceae;D_5__Gemmatimonas
4e98c97202e946d144a562c34020f98c	2	0	1	0	3	0	0	0	0	1	2	2	0	0	0	0	0	1	2	0	0	0	0	0	0	1	0	2	0	1	0	1	1	4	0	7	D_0__Bacteria;D_1__Planctomycetes;D_2__Phycisphaerae;D_3__Phycisphaerales;D_4__Phycisphaeraceae;D_5__SM1A02;D_6__uncultured Phycisphaerales bacterium
85d6b7381c1395b7f75d30dc571cc837	0	0	1	0	0	0	0	0	0	0	0	0	0	2	0	0	0	5	0	0	0	0	0	0	0	0	0	0	0	0	0	0	0	0	0	0	D_0__Bacteria;D_1__Proteobacteria;D_2__Deltaproteobacteria;D_3__Myxococcales;D_4__Phaselicystidaceae;D_5__Phaselicystis;D_6__myxobacterium AT1-01
db5a457403287a4346adc18ccb337ae5	0	0	0	0	0	0	0	0	0	0	0	0	0	0	0	0	2	1	0	2	2	1	0	0	0	0	0	0	0	0	0	0	0	0	0	0	D_0__Bacteria;D_1__Latescibacteria;D_2__Latescibacteria;D_3__Latescibacterales;D_4__Latescibacteraceae;D_5__metagenome;D_6__metagenome
1019258ba7d785481719105122906213	0	0	0	0	0	0	0	0	0	2	2	0	0	0	0	0	0	0	0	0	0	1	0	0	0	0	0	0	0	0	0	0	0	0	0	0	D_0__Bacteria;D_1__Proteobacteria;D_2__Gammaproteobacteria;D_3__Enterobacteriales;D_4__Enterobacteriaceae;D_5__Escherichia-Shigella
87a8d5beeb96fe144de3fe4ea9c8bee7	0	0	1	0	0	0	0	0	0	0	0	0	0	0	1	0	0	0	2	0	0	0	0	0	0	0	2	0	3	0	0	0	0	0	0	0	D_0__Bacteria;D_1__Proteobacteria;D_2__Gammaproteobacteria;D_3__Betaproteobacteriales;D_4__Burkholderiaceae
5975e15dc24df61afddfc3d18886f64f	0	1	0	0	0	0	2	0	0	0	0	0	3	0	0	0	0	0	0	0	0	0	0	0	0	0	0	0	0	2	0	0	0	0	0	0	D_0__Bacteria;D_1__Actinobacteria;D_2__Actinobacteria;D_3__Micromonosporales;D_4__Micromonosporaceae
ff768a8ce0cd607afed7ca82a71e666f	0	0	0	0	0	0	0	0	0	0	0	0	0	1	0	0	4	0	0	1	0	0	0	0	0	0	0	0	0	0	2	0	0	0	1	0	D_0__Bacteria;D_1__Actinobacteria
e6cef5c954496f6f16f22e33730d08e1	0	0	0	0	0	0	0	0	0	0	0	0	0	0	0	0	0	0	0	0	0	0	0	0	0	0	0	0	0	0	0	0	0	0	3	4	D_0__Bacteria;D_1__Gemmatimonadetes;D_2__Gemmatimonadetes;D_3__Gemmatimonadales;D_4__Gemmatimonadaceae;D_5__uncultured;D_6__uncultured Pseudomonadales bacterium
bbf52183d625714d9dcc49ad2935061f	0	0	0	0	0	0	0	0	0	0	0	0	0	0	0	0	0	0	0	2	1	0	0	1	0	0	3	0	0	0	0	0	0	0	0	0	D_0__Bacteria;D_1__Acidobacteria;D_2__Subgroup 15
05527b44e57c6042579fdf9252222e7f	1	1	0	3	3	0	2	1	2	3	1	0	1	3	4	0	0	0	0	0	0	0	0	0	0	3	0	3	0	2	1	0	1	5	1	1	D_0__Bacteria;D_1__Actinobacteria;D_2__Thermoleophilia;D_3__Gaiellales;D_4__uncultured
48df3628a47826a37ad21c41a5c045e5	0	0	0	0	0	0	0	2	0	0	3	0	0	0	4	0	0	1	0	0	0	0	0	0	1	0	0	0	0	3	0	0	0	0	2	0	D_0__Bacteria;D_1__Actinobacteria;D_2__Acidimicrobiia;D_3__Microtrichales;D_4__Ilumatobacteraceae
527500573b4c8e81cbd352c75641d045	6	3	1	1	4	0	0	1	0	0	0	0	0	0	1	0	0	0	0	0	0	0	2	0	4	0	0	0	0	0	0	0	2	3	2	0	D_0__Bacteria;D_1__Bacteroidetes;D_2__Bacteroidia;D_3__Sphingobacteriales;D_4__Sphingobacteriaceae;D_5__Pedobacter
d2d4f5c81bf257af32dacaab982d243c	0	0	2	0	0	1	0	0	0	0	0	0	0	0	0	0	0	0	0	0	0	0	0	0	0	0	0	0	0	0	0	0	0	0	0	0	D_0__Bacteria;D_1__Bacteroidetes;D_2__Bacteroidia;D_3__Cytophagales;D_4__Microscillaceae;D_5__uncultured;D_6__Bacteroidetes bacterium N2
e1c45c1c9345c1466f1f20ef443433cb	0	1	0	0	0	0	0	0	0	0	0	0	0	0	0	0	0	0	0	0	0	0	3	0	0	0	0	0	0	0	0	0	0	0	0	0	D_0__Bacteria;D_1__Proteobacteria;D_2__Gammaproteobacteria;D_3__Betaproteobacteriales;D_4__SC-I-84
c530aa9a26e1cd9b8b58fe7f0cdad0c6	0	0	0	0	0	0	0	0	2	1	0	2	0	0	2	0	0	0	0	0	0	0	0	0	0	1	0	4	0	0	4	0	1	2	0	0	D_0__Bacteria;D_1__Firmicutes;D_2__Clostridia;D_3__Clostridiales;D_4__Clostridiaceae 1;D_5__Clostridium sensu stricto 1
0f3298989e549db4ad78f132a96c906f	0	0	0	0	0	0	0	0	0	0	1	0	0	2	0	1	0	1	0	0	0	0	0	0	1	1	0	0	5	0	0	0	0	1	0	0	D_0__Bacteria;D_1__Proteobacteria;D_2__Gammaproteobacteria;D_3__Xanthomonadales;D_4__Xanthomonadaceae;D_5__Arenimonas;D_6__Arenimonas oryziterrae DSM 21050 = YC6267
0554c91acc0fa581fab9ca2a673b085c	18	0	0	0	0	0	0	0	0	0	0	0	0	0	0	0	0	0	0	0	0	0	0	0	0	0	0	0	0	0	0	0	0	0	0	0	D_0__Bacteria;D_1__Bacteroidetes;D_2__Bacteroidia;D_3__Flavobacteriales;D_4__Flavobacteriaceae;D_5__Flavobacterium
71a6e29116fbdc58a7d998905060c723	0	0	0	0	0	1	0	0	0	0	0	0	0	0	0	0	0	0	0	0	0	0	0	0	0	0	0	0	0	0	0	0	0	1	3	0	D_0__Bacteria;D_1__Bacteroidetes;D_2__Bacteroidia;D_3__Chitinophagales;D_4__Chitinophagaceae
584f7d79ea4932bc3998ffc7cb36b76f	0	0	1	0	0	3	0	2	0	0	0	3	0	0	0	0	0	0	0	0	0	0	0	0	0	0	0	0	0	0	0	0	0	0	1	7	D_0__Bacteria;D_1__Proteobacteria;D_2__Gammaproteobacteria;D_3__Betaproteobacteriales;D_4__Burkholderiaceae
f18a21db241b4a624c503fb315027ebf	0	0	0	0	2	0	1	0	0	0	2	5	2	0	1	2	2	1	0	1	2	0	4	2	1	2	0	2	1	0	3	2	1	2	3	0	D_0__Bacteria;D_1__Actinobacteria;D_2__Actinobacteria;D_3__Propionibacteriales;D_4__Nocardioidaceae
cbe6eed4f5f662fc8cfbcc3641f73481	0	0	0	0	0	0	0	0	0	1	3	1	0	0	0	0	0	0	0	0	0	0	1	0	0	0	1	0	0	1	1	4	5	1	2	1	D_0__Bacteria;D_1__Proteobacteria;D_2__Gammaproteobacteria;D_3__Xanthomonadales;D_4__Xanthomonadaceae
5caacbc279cd8e90e5e12dd60ebc1ede	0	0	0	0	0	0	0	0	0	0	0	0	0	0	0	0	0	0	0	0	0	1	0	0	0	0	0	0	0	0	2	0	0	2	0	3	D_0__Bacteria;D_1__Chloroflexi;D_2__Dehalococcoidia;D_3__S085
6cbde925201b495c4ab77154eb36a5df	0	0	0	0	0	0	1	0	0	2	0	0	0	0	0	0	0	0	0	0	0	0	0	0	0	0	0	0	1	0	0	0	0	0	0	0	D_0__Bacteria;D_1__Actinobacteria;D_2__Thermoleophilia;D_3__Gaiellales;D_4__uncultured;D_5__bacterium Ellin6515;D_6__bacterium Ellin6515
ec4e585a6596e8edbd40318227836c0d	0	0	0	0	0	0	0	0	0	2	6	0	0	0	0	0	0	0	1	0	0	1	0	0	0	0	0	0	0	0	2	0	0	0	1	0	D_0__Bacteria;D_1__Firmicutes;D_2__Clostridia;D_3__Clostridiales;D_4__Ruminococcaceae;D_5__[Eubacterium] coprostanoligenes group;D_6__human gut metagenome
04d3175df67d01621b3f240472adcfbb	0	1	0	1	0	0	0	0	0	0	0	0	0	0	0	0	0	0	0	0	0	0	0	0	0	0	0	0	0	0	0	0	0	0	1	0	D_0__Bacteria;D_1__Proteobacteria;D_2__Gammaproteobacteria;D_3__Betaproteobacteriales;D_4__Nitrosomonadaceae;D_5__mle1-7;D_6__uncultured Burkholderiales bacterium
7573311fc410903fc86b7709e199d9cf	0	0	0	0	0	0	0	0	0	0	0	0	1	0	0	0	0	0	0	0	0	0	0	0	0	0	5	0	0	0	0	0	0	0	0	0	D_0__Bacteria;D_1__Gemmatimonadetes;D_2__Gemmatimonadetes;D_3__Gemmatimonadales;D_4__Gemmatimonadaceae;D_5__uncultured;D_6__uncultured low G+C Gram-positive bacterium
fda8217c9fca2ca60efcd2821412e976	0	1	2	2	1	0	0	0	1	0	3	0	2	0	2	0	0	2	0	1	0	0	0	0	1	0	0	0	1	0	1	0	2	1	1	0	D_0__Bacteria;D_1__Actinobacteria;D_2__Actinobacteria;D_3__Streptomycetales;D_4__Streptomycetaceae;D_5__Streptomyces
316320bd3b3a3275940200d2ba91e807	0	0	0	0	0	0	0	0	0	0	0	0	6	2	0	0	5	2	25	10	4	1	2	0	0	6	5	2	4	0	0	0	0	0	0	0	D_0__Bacteria;D_1__Proteobacteria;D_2__Deltaproteobacteria;D_3__RCP2-54
611bb416ac94e3f7814fab8c2acdee4c	2	0	0	0	0	0	0	0	0	0	0	0	0	0	0	0	2	0	0	0	0	1	0	0	0	0	1	0	0	1	0	0	0	0	0	0	D_0__Bacteria;D_1__Verrucomicrobia;D_2__Verrucomicrobiae;D_3__Pedosphaerales;D_4__Pedosphaeraceae
968c6f0d1444b400ad14d12a1d80f17c	0	4	3	0	0	0	0	2	1	2	1	4	0	0	0	0	0	0	0	0	1	0	0	0	0	0	0	0	0	0	0	0	0	0	0	0	D_0__Bacteria;D_1__Proteobacteria;D_2__Gammaproteobacteria
3122d91fa95fc42ed477a0c3ab4bebda	0	0	0	0	0	0	0	0	0	0	0	0	0	0	0	0	0	0	0	0	2	0	0	0	1	5	2	0	5	0	0	0	0	0	0	0	D_0__Bacteria;D_1__Proteobacteria;D_2__Gammaproteobacteria;D_3__Pseudomonadales;D_4__Pseudomonadaceae;D_5__Pseudomonas
16b5a3db16bcd3f423f86f550409c575	0	0	1	0	2	0	1	2	0	8	0	0	0	0	1	0	0	2	4	0	0	4	5	0	0	0	1	1	0	1	0	1	4	1	1	1	D_0__Bacteria;D_1__Proteobacteria;D_2__Deltaproteobacteria;D_3__Desulfarculales;D_4__Desulfarculaceae;D_5__uncultured
63fbef001ff9af4c4349955e4365c945	0	0	0	0	1	0	0	2	0	0	0	1	0	2	0	2	0	0	0	0	0	0	0	0	0	0	0	0	0	0	0	0	2	0	0	0	D_0__Bacteria;D_1__Actinobacteria;D_2__Actinobacteria;D_3__Micromonosporales;D_4__Micromonosporaceae
0493aba7d26401a5fb146291fb888b5c	0	0	0	0	0	0	0	0	0	0	0	0	3	3	2	0	0	1	0	2	0	0	0	0	1	3	1	4	0	2	0	0	0	0	0	0	D_0__Bacteria;D_1__Proteobacteria;D_2__Gammaproteobacteria;D_3__Betaproteobacteriales;D_4__SC-I-84
b4f78f34c0777ce9c250d17e91062541	2	0	0	0	0	0	0	0	0	2	0	2	0	0	0	0	0	0	0	0	0	0	0	0	0	0	3	2	0	1	0	1	2	1	2	2	D_0__Bacteria
e65b8e6528ae324cb9a3e198593d2365	0	0	0	0	1	0	0	0	0	0	0	0	0	0	0	0	0	0	0	0	0	0	0	0	1	0	1	0	0	0	0	1	0	0	0	0	D_0__Bacteria;D_1__Bacteroidetes;D_2__Bacteroidia;D_3__Chitinophagales;D_4__Chitinophagaceae
45053502e5858dec3a508bb5533197fa	1	0	0	0	0	0	0	0	0	0	0	0	0	1	0	0	0	0	1	0	0	0	0	0	0	0	0	2	0	0	0	0	0	0	0	0	D_0__Bacteria;D_1__Acidobacteria;D_2__Blastocatellia (Subgroup 4);D_3__11-24;D_4__uncultivated soil bacterium clone S111;D_5__uncultivated soil bacterium clone S111;D_6__uncultivated soil bacterium clone S111
b53d0ee8958346dffa879746f6ec1052	0	0	0	0	0	1	0	2	5	2	0	1	0	0	2	0	2	0	0	0	0	0	0	0	0	2	0	0	0	0	3	3	0	0	1	3	D_0__Bacteria;D_1__Proteobacteria;D_2__Deltaproteobacteria;D_3__Myxococcales;D_4__Haliangiaceae;D_5__Haliangium
1d6cb6aea4007ea34916940116b71fc3	0	0	0	0	0	0	0	0	0	0	0	0	0	3	0	0	0	0	0	0	1	0	0	0	0	0	0	0	0	0	0	0	2	2	0	0	D_0__Bacteria;D_1__Proteobacteria;D_2__Gammaproteobacteria;D_3__Betaproteobacteriales;D_4__SC-I-84
f5d26c3ef6e9669d42edecbfde35404c	0	0	1	1	1	0	2	0	0	0	0	1	0	0	0	0	0	0	0	0	1	1	0	0	0	0	0	0	1	0	0	2	2	0	0	0	D_0__Bacteria;D_1__Actinobacteria;D_2__Actinobacteria;D_3__Micromonosporales;D_4__Micromonosporaceae;D_5__Hamadaea
670422f8a6c0c5798449b9d398664852	0	0	1	0	0	0	2	0	0	0	0	0	0	0	0	0	2	0	0	0	0	0	0	0	0	0	0	0	2	0	0	0	2	0	0	0	D_0__Bacteria;D_1__Proteobacteria;D_2__Alphaproteobacteria;D_3__Rhodobacterales;D_4__Rhodobacteraceae
b7a4053456daf85266eaee633508a8de	0	0	0	0	2	2	0	0	0	1	0	2	0	2	0	0	0	0	0	2	0	0	0	3	1	1	0	2	0	2	0	0	2	1	0	1	D_0__Bacteria;D_1__Proteobacteria;D_2__Gammaproteobacteria;D_3__Gammaproteobacteria Incertae Sedis;D_4__Unknown Family;D_5__Acidibacter
15674539066aa16fbbe00e474f8a774d	0	0	0	0	0	0	0	0	0	0	2	0	0	1	0	1	2	0	2	4	0	0	0	0	0	0	0	0	0	3	0	0	0	0	0	0	D_0__Bacteria;D_1__Acidobacteria;D_2__Acidobacteriia;D_3__Solibacterales;D_4__Solibacteraceae (Subgroup 3);D_5__Candidatus Solibacter
0c85cb8537cdf7837b03f3ca3c8d6ae6	3	0	0	0	6	0	1	3	0	3	1	0	0	0	0	0	0	0	0	0	0	0	0	1	0	0	0	0	0	0	2	0	0	1	0	0	D_0__Bacteria;D_1__Proteobacteria;D_2__Alphaproteobacteria;D_3__Rhizobiales;D_4__Rhizobiaceae;D_5__Allorhizobium-Neorhizobium-Pararhizobium-Rhizobium
72f5b720d5d01f34e997d6096b70337f	0	2	5	1	2	4	0	3	6	2	2	3	0	0	0	0	0	0	0	0	0	2	2	0	0	4	2	0	0	2	2	2	5	7	4	4	D_0__Bacteria;D_1__Actinobacteria;D_2__Actinobacteria;D_3__Micromonosporales;D_4__Micromonosporaceae
6985c8b31a0bdb97ec8741ffb6a2620e	0	0	0	0	0	0	0	0	0	0	2	0	0	0	0	0	0	0	0	0	0	0	0	0	0	0	0	0	2	0	0	0	0	0	0	0	D_0__Bacteria;D_1__Proteobacteria;D_2__Alphaproteobacteria
eec53669eaa01a7130cd70f52259a81f	0	0	0	1	0	2	0	0	0	0	0	2	0	0	0	0	0	0	0	0	3	0	0	0	0	0	0	0	0	0	3	0	2	0	3	2	D_0__Bacteria;D_1__Acidobacteria;D_2__Acidobacteriia;D_3__Solibacterales;D_4__Solibacteraceae (Subgroup 3);D_5__Bryobacter
34474a9e4037b26ac6544fb17331c357	3	4	3	5	6	0	0	2	1	6	0	0	5	0	3	0	3	1	2	0	3	0	3	0	1	3	4	5	0	1	2	2	2	4	1	0	D_0__Bacteria;D_1__Gemmatimonadetes;D_2__Gemmatimonadetes;D_3__Gemmatimonadales;D_4__Gemmatimonadaceae;D_5__uncultured
322bbd371c73b932eafc6c8321da5f98	0	0	2	0	0	0	1	1	0	2	4	1	0	2	0	0	0	0	0	1	3	0	0	2	0	0	0	0	0	1	0	0	2	2	1	0	D_0__Bacteria;D_1__Proteobacteria;D_2__Deltaproteobacteria;D_3__RCP2-54
a89baa73d75dedc06ecc7fa3fd9684e0	0	0	0	0	0	0	0	0	0	0	0	0	1	1	4	0	1	0	0	0	0	0	0	2	0	0	0	0	0	0	0	0	0	0	0	0	D_0__Bacteria;D_1__Proteobacteria;D_2__Gammaproteobacteria;D_3__Xanthomonadales;D_4__Rhodanobacteraceae;D_5__Dokdonella
6563cc595e047dfa03eae7300d84a552	0	0	0	0	0	0	0	0	0	0	0	0	0	0	1	0	2	0	0	0	0	0	0	0	1	0	0	0	0	2	0	0	0	0	0	0	D_0__Bacteria;D_1__Actinobacteria;D_2__Actinobacteria;D_3__Micrococcales;D_4__Microbacteriaceae;D_5__Microbacterium
eccb1bbd6fb631932db2629b657de6e9	4	9	0	1	2	2	5	7	4	3	2	1	10	5	7	13	5	1	0	9	0	5	3	5	8	1	7	1	0	7	3	3	0	1	1	4	D_0__Bacteria;D_1__Bacteroidetes;D_2__Bacteroidia;D_3__Chitinophagales;D_4__Chitinophagaceae;D_5__uncultured;D_6__uncultured Ferruginibacter sp.
9127f159835e0fece8f64f42249134eb	0	2	0	6	1	0	0	0	0	0	0	0	0	0	0	1	0	0	0	0	0	0	0	0	0	0	0	0	0	0	0	0	0	0	0	0	D_0__Bacteria;D_1__Proteobacteria;D_2__Gammaproteobacteria
2f7e7e45c91b98e3a659b27f4e95c6ff	0	0	0	0	0	0	0	1	2	0	0	0	0	0	0	2	0	0	0	0	0	0	0	0	0	2	0	0	0	0	0	0	0	0	0	0	D_0__Bacteria;D_1__Firmicutes;D_2__Bacilli;D_3__Bacillales;D_4__Thermoactinomycetaceae;D_5__Thermoactinomyces
5fc858eed693acc782bc4061931093af	1	4	0	0	0	0	0	0	0	2	4	0	0	1	6	0	2	0	9	0	2	6	12	0	0	0	0	2	0	0	3	1	2	2	3	0	D_0__Bacteria;D_1__Bacteroidetes;D_2__Bacteroidia;D_3__Chitinophagales;D_4__Chitinophagaceae
628a127282b8c217dba7048326599d2f	0	0	0	0	2	0	0	1	0	0	1	0	0	1	2	0	0	0	0	0	0	0	0	0	0	2	0	0	0	0	0	0	0	0	0	0	D_0__Bacteria;D_1__Bacteroidetes;D_2__Bacteroidia;D_3__Sphingobacteriales;D_4__Sphingobacteriaceae;D_5__Solitalea;D_6__Solitalea canadensis
1df8898fa46d647d4152fff99154ccc9	0	0	0	0	0	3	0	0	0	0	1	0	0	0	0	0	0	0	0	0	0	0	1	0	2	0	0	0	0	2	0	0	0	0	0	0	D_0__Bacteria;D_1__Acidobacteria;D_2__Holophagae
32f9e09fc9d316fea8c9e615b5d17bd7	0	0	0	0	0	0	0	0	0	0	1	1	0	0	0	0	0	0	0	0	0	0	0	0	0	0	0	0	0	0	0	0	0	1	1	1	D_0__Bacteria;D_1__Proteobacteria;D_2__Deltaproteobacteria;D_3__Myxococcales;D_4__bacteriap25;D_5__uncultured Desulfovibrionales bacterium;D_6__uncultured Desulfovibrionales bacterium
82883f307d16a093c81f5fe27650bfc7	3	2	0	0	0	0	0	0	4	0	1	0	0	0	0	0	0	0	0	0	0	0	0	0	0	0	0	0	0	0	0	0	1	0	1	0	D_0__Bacteria;D_1__Proteobacteria;D_2__Gammaproteobacteria;D_3__Betaproteobacteriales
cac4887a6dfbe1b446221f8c2e159d73	0	0	0	0	0	0	1	0	0	0	0	0	0	1	0	0	0	0	0	0	0	0	0	0	0	0	0	0	0	0	3	0	1	0	0	0	D_0__Bacteria;D_1__Proteobacteria;D_2__Gammaproteobacteria;D_3__Betaproteobacteriales
3841b1560848e03d5ba2f5714bcbbe0a	2	0	5	5	3	0	1	0	2	3	0	0	4	2	0	1	0	0	0	2	0	1	2	0	1	0	3	6	1	2	4	8	3	4	7	2	D_0__Bacteria;D_1__Latescibacteria
a5c07eb0823238cadf4b0d14833012ac	0	0	0	0	0	0	0	0	0	0	0	0	0	0	0	0	0	0	0	0	0	0	0	0	12	27	2	4	1	12	0	0	0	0	0	0	D_0__Bacteria;D_1__Proteobacteria;D_2__Gammaproteobacteria;D_3__Xanthomonadales;D_4__Xanthomonadaceae;D_5__Luteimonas
b788c94405d2df2993ddde70913ff9b0	0	0	0	0	0	0	0	0	0	0	0	1	0	0	0	2	0	0	0	0	0	0	0	0	0	0	0	0	0	0	1	0	0	0	0	0	D_0__Bacteria;D_1__Patescibacteria;D_2__Saccharimonadia;D_3__Saccharimonadales;D_4__bacterium LWQ8;D_5__bacterium LWQ8;D_6__bacterium LWQ8
069f4d6ccb97c017f0c7fddd2d066d3e	3	0	0	0	0	3	0	0	0	0	0	0	0	0	0	0	0	0	0	0	0	0	0	0	0	0	0	0	0	0	0	0	0	0	1	0	D_0__Bacteria;D_1__Proteobacteria;D_2__Gammaproteobacteria;D_3__Betaproteobacteriales;D_4__Burkholderiaceae
1d5c5652bf36f4ea83d1acbc1cd3229e	0	0	2	0	0	0	0	1	1	2	2	1	0	0	0	0	0	0	0	0	0	0	0	0	0	0	0	0	0	0	0	0	1	0	0	3	D_0__Bacteria;D_1__Proteobacteria;D_2__Gammaproteobacteria;D_3__Betaproteobacteriales;D_4__Burkholderiaceae
43ea84db06c7cc335b86f4f6fb202603	0	0	0	0	0	0	0	0	0	0	0	0	0	1	0	0	0	0	0	0	0	0	0	1	0	2	2	0	0	0	0	0	0	3	0	0	D_0__Bacteria;D_1__Gemmatimonadetes;D_2__Gemmatimonadetes;D_3__Gemmatimonadales;D_4__Gemmatimonadaceae;D_5__uncultured;D_6__Gemmatimonadetes bacterium LX87
508d9ecd3446b401813ab39a7bcb90ee	0	0	1	1	0	3	4	4	0	0	0	2	2	0	0	0	0	0	3	4	0	0	2	0	2	3	0	0	1	1	1	2	3	2	0	0	D_0__Bacteria;D_1__Actinobacteria;D_2__Actinobacteria;D_3__Corynebacteriales;D_4__Nocardiaceae;D_5__Rhodococcus
613c833d185156490bf15a21cab6005d	0	0	0	0	0	0	0	0	0	0	0	0	2	0	3	2	0	0	0	0	0	0	0	0	0	0	0	0	0	1	0	0	0	0	0	0	D_0__Bacteria;D_1__Chloroflexi;D_2__KD4-96
fa1c898da5c2483232e18970c720048b	1	0	0	0	0	0	0	0	0	0	0	0	0	3	0	0	0	0	0	0	0	0	0	0	0	0	0	0	0	0	0	0	0	0	2	1	D_0__Bacteria;D_1__Bacteroidetes;D_2__Bacteroidia;D_3__Chitinophagales;D_4__Saprospiraceae;D_5__Phaeodactylibacter;D_6__uncultured Haliscomenobacter sp.
9bab106ff5c7dfaa916271e4ebe0c265	0	3	4	0	0	6	3	0	0	0	1	2	0	0	0	2	0	0	0	0	0	0	0	0	0	0	0	0	0	0	2	0	0	0	2	1	D_0__Bacteria;D_1__Firmicutes;D_2__Clostridia;D_3__Clostridiales;D_4__Lachnospiraceae;D_5__Fusicatenibacter
6cdcbb7f529aa610081a1cbed0bb8816	3	0	9	3	0	4	0	0	0	0	0	0	0	0	0	0	0	0	0	0	0	0	0	0	1	0	0	0	7	0	0	1	0	1	6	0	D_0__Bacteria;D_1__Proteobacteria;D_2__Deltaproteobacteria;D_3__Myxococcales;D_4__Sandaracinaceae
7c608177bc3aaf687e24e130fad9c393	1	1	1	3	3	2	0	0	4	2	0	2	12	2	0	7	0	1	0	2	0	2	0	0	2	0	3	0	0	3	0	0	1	0	0	0	D_0__Bacteria;D_1__Acidobacteria;D_2__Subgroup 6;D_3__Acidobacteria bacterium SCN 69-37;D_4__Acidobacteria bacterium SCN 69-37;D_5__Acidobacteria bacterium SCN 69-37;D_6__Acidobacteria bacterium SCN 69-37
746749ed2193a2428c0e0c5b9d794854	0	0	0	0	0	0	0	0	0	1	0	0	0	8	2	2	2	10	0	0	0	0	1	0	0	1	0	0	0	1	0	0	0	0	0	0	D_0__Bacteria;D_1__Gemmatimonadetes;D_2__Gemmatimonadetes;D_3__Gemmatimonadales;D_4__Gemmatimonadaceae;D_5__Gemmatimonas;D_6__Gemmatimonas phototrophica
4c8d7ba773e93de81c10004bac379aa1	0	0	0	0	0	0	0	0	0	0	0	0	0	0	0	0	0	1	0	0	2	0	0	0	0	0	3	0	0	0	1	0	0	0	0	0	D_0__Bacteria;D_1__Proteobacteria;D_2__Gammaproteobacteria;D_3__Betaproteobacteriales;D_4__Nitrosomonadaceae;D_5__Nitrosospira
7251a99a274950d01bb96f41cec6b1b4	1	0	0	0	0	0	0	0	0	0	0	0	0	0	0	0	0	0	0	0	0	2	0	0	0	0	4	2	0	0	0	0	1	0	0	0	D_0__Bacteria;D_1__Proteobacteria;D_2__Alphaproteobacteria;D_3__Elsterales;D_4__uncultured
b11916c09c1cf94089ec5af8a14bf0fa	0	0	0	4	0	0	0	0	0	0	0	0	0	0	0	0	0	0	0	2	0	0	0	0	0	0	0	0	0	0	0	3	0	0	0	0	D_0__Bacteria;D_1__Proteobacteria;D_2__Alphaproteobacteria;D_3__Caulobacterales;D_4__Caulobacteraceae
76c057a898dff60b5d880541188d14cb	1	1	0	0	0	0	0	1	0	0	0	0	1	0	2	8	3	1	3	7	0	1	2	2	3	0	7	2	4	2	0	0	0	0	0	0	D_0__Bacteria
5271a26e422d9f741ca2773ba09afce1	2	0	0	0	0	0	0	0	0	0	0	0	0	0	0	0	0	0	0	0	0	0	0	0	0	0	0	0	0	0	0	0	0	0	0	0	D_0__Bacteria;D_1__Gemmatimonadetes;D_2__Gemmatimonadetes;D_3__Gemmatimonadales;D_4__Gemmatimonadaceae;D_5__Gemmatimonas
aacebe767dd74d8fd4da9ac4be5cfae8	1	4	2	1	4	11	4	6	2	3	1	3	2	0	0	0	3	3	0	0	1	1	1	0	1	2	0	0	1	0	0	3	5	2	3	0	D_0__Bacteria;D_1__Gemmatimonadetes;D_2__Gemmatimonadetes;D_3__Gemmatimonadales;D_4__Gemmatimonadaceae;D_5__uncultured;D_6__Gemmatimonadetes bacterium LP81
fe347652d7c3054cadd895dca78fea9e	0	0	0	1	0	0	0	0	0	0	0	0	0	0	0	0	1	0	0	0	0	0	0	2	0	1	0	2	9	0	0	0	0	0	0	0	D_0__Bacteria;D_1__Actinobacteria;D_2__Actinobacteria;D_3__Micrococcales;D_4__Cellulomonadaceae;D_5__Cellulomonas
5e7114f704dd043d2de028c130777322	0	0	1	0	1	0	0	5	0	0	2	3	0	0	0	0	0	0	0	0	0	1	0	0	0	0	1	0	0	0	0	0	1	0	3	0	D_0__Bacteria;D_1__Proteobacteria;D_2__Deltaproteobacteria;D_3__Myxococcales;D_4__MSB-4B10;D_5__uncultured proteobacterium;D_6__uncultured proteobacterium
b05951e03c39a6cdbdac4fc8c9f8cb83	0	0	0	0	0	0	0	1	1	0	2	0	0	0	0	0	0	0	0	0	0	0	0	0	0	0	0	0	0	0	2	0	1	0	0	0	D_0__Bacteria;D_1__Acidobacteria;D_2__Acidobacteriia;D_3__Acidobacteriales;D_4__Acidobacteriaceae (Subgroup 1)
e7d3f873b6e83a490932bab258a4221d	0	0	0	0	1	0	0	0	0	0	0	0	1	0	0	0	2	0	0	0	0	0	0	0	0	0	0	0	0	1	0	0	0	0	0	1	D_0__Bacteria;D_1__Acidobacteria;D_2__Acidobacteriia;D_3__Acidobacteriales
d7969409aa12f0c004d82220432f1d44	2	0	0	0	0	0	0	0	0	0	0	0	0	0	0	0	0	0	0	0	0	0	0	0	0	0	0	0	1	0	0	0	1	0	0	0	D_0__Bacteria;D_1__Proteobacteria;D_2__Alphaproteobacteria;D_3__Elsterales;D_4__uncultured;D_5__uncultured bacterium DA111;D_6__uncultured bacterium DA111
752f04f5ebc071107d1a415e95845b67	0	2	0	0	0	0	0	0	0	0	1	0	0	0	0	0	0	0	0	0	0	0	2	0	0	0	2	0	0	0	0	0	0	0	0	0	D_0__Bacteria;D_1__Gemmatimonadetes;D_2__Gemmatimonadetes;D_3__Gemmatimonadales;D_4__Gemmatimonadaceae
8a63e81f2f3feecf112d809de9a187d7	0	0	0	0	0	0	0	2	2	0	2	0	0	0	3	0	0	0	0	0	0	0	0	0	0	0	0	0	0	0	0	0	0	0	0	0	D_0__Bacteria;D_1__Proteobacteria;D_2__Gammaproteobacteria
edbd148847836d40ec76e590f1ac09a8	0	0	0	0	0	0	0	0	0	0	0	0	0	0	0	0	0	0	0	0	0	0	0	0	0	0	0	0	8	0	0	0	0	0	0	0	D_0__Archaea;D_1__Thaumarchaeota;D_2__Nitrososphaeria;D_3__Nitrosotaleales;D_4__Nitrosotaleaceae;D_5__Candidatus Nitrosotalea;D_6__Candidatus Nitrosotalea devanaterra
ec8b736d1f4cb9e61a105234614b9644	1	5	0	3	2	0	2	5	4	2	0	2	6	1	5	4	3	0	12	14	3	2	7	4	2	6	3	5	0	3	0	3	0	3	2	1	D_0__Bacteria;D_1__Bacteroidetes;D_2__Bacteroidia;D_3__Chitinophagales;D_4__Saprospiraceae;D_5__Phaeodactylibacter;D_6__uncultured Haliscomenobacter sp.
0d9e5aa416097b81ff42f9b4f6646366	1	0	0	4	0	0	0	0	0	0	0	0	0	0	0	0	0	0	0	0	0	0	0	0	0	0	0	0	0	0	0	0	0	0	0	0	D_0__Bacteria;D_1__Actinobacteria;D_2__Actinobacteria;D_3__Frankiales;D_4__Acidothermaceae;D_5__Acidothermus;D_6__bacterium Ellin334
15de88813bb6724ffdd00b05f9907810	0	0	0	0	0	0	0	0	0	0	0	0	0	1	0	6	0	2	0	5	2	0	0	1	0	1	1	1	0	0	0	0	0	0	0	0	D_0__Bacteria;D_1__Actinobacteria;D_2__Actinobacteria;D_3__Micrococcales;D_4__Microbacteriaceae
7a3bf4116716a1c60dcbbf65f06d75d0	0	1	0	0	0	2	0	0	0	0	0	0	0	0	0	0	0	0	0	0	0	0	0	0	0	0	0	0	0	0	0	3	0	3	0	3	D_0__Bacteria;D_1__Proteobacteria;D_2__Gammaproteobacteria;D_3__Betaproteobacteriales
fbcc283c3d4c1ae629fcf245554067a5	0	0	0	0	0	0	0	0	0	0	0	0	0	0	0	0	0	0	0	1	0	0	1	1	2	0	4	0	0	0	0	0	0	0	0	0	D_0__Bacteria;D_1__Acidobacteria;D_2__Acidobacteriia;D_3__Solibacterales;D_4__Solibacteraceae (Subgroup 3);D_5__Candidatus Solibacter
d8c4b759dbc63f77c991755a512aef4a	1	0	0	2	0	0	0	0	0	0	0	0	0	0	0	0	0	0	2	0	0	0	0	1	0	0	0	0	1	0	0	1	4	0	1	0	D_0__Bacteria;D_1__Proteobacteria;D_2__Deltaproteobacteria;D_3__Myxococcales;D_4__Haliangiaceae;D_5__Haliangium;D_6__myxobacterium AT3-03
07d723b6f4b67e672df7514738c5fa68	1	0	0	0	0	0	0	0	1	0	0	1	0	0	0	0	0	0	0	0	0	0	0	1	0	0	1	0	0	0	3	0	0	0	1	0	D_0__Bacteria;D_1__Proteobacteria;D_2__Deltaproteobacteria;D_3__Desulfarculales;D_4__Desulfarculaceae;D_5__uncultured;D_6__uncultured sludge bacterium H16
3bf2244ea6d422728d1519d3bc798455	1	0	0	1	0	0	0	0	0	0	0	0	1	3	2	1	7	0	3	3	2	7	4	5	5	10	10	2	9	5	0	0	0	0	0	0	D_0__Bacteria;D_1__Bacteroidetes;D_2__Bacteroidia;D_3__Chitinophagales;D_4__Chitinophagaceae;D_5__Terrimonas
5647e2e4cd02f0ce78a2b7c40da92f13	2	0	0	0	0	1	1	0	1	0	0	0	0	0	0	0	0	0	0	0	0	0	0	0	0	0	0	0	0	0	0	0	0	0	0	0	D_0__Bacteria;D_1__Proteobacteria;D_2__Alphaproteobacteria;D_3__Caulobacterales;D_4__Caulobacteraceae;D_5__Phenylobacterium
199ad70df5e7494649e0b0b784698b2d	0	0	0	0	0	0	0	0	0	0	0	0	0	0	5	0	0	0	0	0	0	0	2	0	1	0	0	0	0	0	0	0	0	0	3	0	D_0__Bacteria;D_1__Bacteroidetes;D_2__Bacteroidia;D_3__Flavobacteriales;D_4__Weeksellaceae;D_5__Chryseobacterium
3681a1d030989fbd0ddb62e3d65c9cc8	0	0	0	0	0	0	0	0	0	0	0	0	0	3	7	4	0	0	0	0	0	0	0	0	3	2	0	2	0	1	0	0	0	0	0	0	D_0__Bacteria;D_1__Bacteroidetes;D_2__Bacteroidia;D_3__Flavobacteriales;D_4__Weeksellaceae;D_5__Chryseobacterium
01205f1cbf3becd00bb134dfe6a1aa17	7	4	3	8	7	11	15	1	0	6	6	6	0	1	0	0	0	0	0	0	0	1	0	3	0	1	4	3	0	0	7	9	6	0	2	2	D_0__Bacteria;D_1__Acidobacteria;D_2__Acidobacteriia;D_3__Solibacterales;D_4__Solibacteraceae (Subgroup 3);D_5__Bryobacter
7234a232757f06d7b99a76a8142577d4	0	0	0	0	0	0	0	0	0	0	0	0	0	0	0	0	0	0	0	0	0	0	0	0	2	0	0	0	0	0	1	0	0	0	1	0	D_0__Bacteria;D_1__Acidobacteria;D_2__Acidobacteriia;D_3__Acidobacteriales;D_4__uncultured;D_5__Acidobacteria bacterium LWQ13;D_6__Acidobacteria bacterium LWQ13
2909a60a56ef6e90f5dfab62107c10c1	0	0	0	0	0	0	0	0	0	0	0	0	0	1	0	0	0	0	0	1	0	0	0	0	0	1	0	1	2	0	0	0	0	1	0	0	D_0__Bacteria;D_1__Actinobacteria;D_2__Acidimicrobiia;D_3__IMCC26256
19a33219277e801afceea50990cfae9e	0	2	0	0	0	0	0	1	3	0	0	2	0	0	0	0	0	0	0	0	0	0	0	0	0	0	0	0	2	0	0	0	0	0	0	3	D_0__Bacteria;D_1__Verrucomicrobia;D_2__Verrucomicrobiae;D_3__Pedosphaerales;D_4__Pedosphaeraceae
53e1f2dfaf49a86e790649198e54ee50	1	0	0	0	0	0	0	0	0	0	0	0	0	0	1	0	0	0	0	0	1	0	0	0	0	0	0	0	0	0	0	0	0	1	0	1	D_0__Bacteria;D_1__Proteobacteria;D_2__Gammaproteobacteria;D_3__Betaproteobacteriales;D_4__Burkholderiaceae;D_5__Cupriavidus
38b3bae80baccf51b759b322c394e9b6	0	1	1	0	0	0	0	4	0	1	1	3	3	2	0	0	7	0	6	2	3	3	3	2	2	14	4	3	0	2	1	0	0	0	2	2	D_0__Bacteria;D_1__Acidobacteria;D_2__Subgroup 6
0e97a4671599377fdaddc339a47425d0	4	1	4	1	3	0	2	2	0	3	7	1	0	1	2	0	3	3	4	0	3	9	0	1	0	5	2	0	3	2	0	2	3	3	6	1	D_0__Bacteria;D_1__Proteobacteria;D_2__Deltaproteobacteria
8c0ac890f0a775cfef89726d6a7fca36	5	1	1	2	1	1	0	2	4	2	2	6	7	2	3	6	7	3	5	6	3	1	6	4	4	8	3	0	3	0	3	5	5	2	0	3	D_0__Bacteria;D_1__Proteobacteria;D_2__Alphaproteobacteria;D_3__Rhizobiales
ae1f9bcd41af9a8305b157657b364a18	0	0	0	0	0	0	0	2	2	0	4	0	0	0	0	0	0	0	0	0	0	31	0	3	0	0	1	0	0	0	0	0	0	0	2	1	D_0__Bacteria;D_1__Firmicutes;D_2__Bacilli;D_3__Lactobacillales;D_4__Lactobacillaceae;D_5__Lactobacillus
1f52104cf255260c27824b2e831c2129	1	0	0	0	0	1	0	1	0	0	2	2	2	0	0	0	0	0	0	0	0	0	0	2	1	0	1	0	0	0	1	0	1	2	1	0	D_0__Bacteria;D_1__Gemmatimonadetes;D_2__Gemmatimonadetes;D_3__Gemmatimonadales;D_4__Gemmatimonadaceae;D_5__uncultured;D_6__Gemmatimonadetes bacterium LP81
f9df9a51f0ca9de014ff9a0c52ba4aa4	0	2	1	0	0	0	0	7	0	0	0	1	0	0	2	0	0	0	1	0	0	1	0	0	0	1	0	0	0	0	1	0	0	0	1	2	D_0__Bacteria;D_1__Acidobacteria;D_2__Subgroup 6
0cd47b02449e30ff335455f146a2b552	0	0	0	0	0	0	0	0	0	0	1	0	0	0	0	1	0	0	0	0	0	0	0	0	0	0	0	0	0	0	0	0	2	0	2	0	D_0__Bacteria;D_1__Actinobacteria;D_2__Thermoleophilia
8853fdb87734e127abb0ec2e1bdebd3b	0	0	0	0	0	0	0	0	0	0	2	0	0	1	0	0	0	0	0	0	2	0	2	42	3	0	0	0	2	2	0	0	0	1	1	3	D_0__Bacteria;D_1__Bacteroidetes;D_2__Bacteroidia;D_3__Flavobacteriales;D_4__Flavobacteriaceae;D_5__Flavobacterium
008f8255dc79e7076d266e089a9121b1	4	2	1	1	0	0	1	1	0	1	1	1	0	0	2	0	2	1	0	0	0	2	0	0	0	0	0	0	0	0	4	2	5	5	2	2	D_0__Bacteria;D_1__Proteobacteria;D_2__Alphaproteobacteria;D_3__Rhizobiales;D_4__KF-JG30-B3;D_5__uncultured soil bacterium;D_6__uncultured soil bacterium
e18183f9b32a838f655766b23f7ca99a	3	0	0	0	0	0	0	0	0	0	3	0	0	0	0	0	0	0	0	0	0	0	0	0	0	0	0	0	0	0	1	0	0	0	0	0	D_0__Bacteria
ef111d00cbf419e4ef817375b62f7576	1	0	0	1	0	0	0	0	0	0	0	0	0	1	0	0	3	0	0	0	0	0	2	0	1	0	0	0	0	0	0	0	0	0	0	1	D_0__Bacteria;D_1__Proteobacteria;D_2__Alphaproteobacteria;D_3__Rhizobiales;D_4__Devosiaceae;D_5__Devosia
c7d4e979962b514ba3931e0a8d252b5d	3	10	1	1	2	0	4	0	4	4	2	6	6	1	9	6	0	2	0	8	0	3	3	0	2	0	8	9	4	8	4	4	5	5	7	4	D_0__Bacteria;D_1__Chloroflexi;D_2__OLB14;D_3__Chloroflexi bacterium OLB14;D_4__Chloroflexi bacterium OLB14;D_5__Chloroflexi bacterium OLB14;D_6__Chloroflexi bacterium OLB14
2f92ec41df04b23aee6c700c980264c3	0	0	0	0	0	0	2	0	0	0	0	0	0	0	0	0	0	0	0	0	0	0	0	0	0	0	0	0	0	0	0	1	1	0	0	2	D_0__Bacteria;D_1__Proteobacteria;D_2__Alphaproteobacteria;D_3__Reyranellales;D_4__Reyranellaceae;D_5__Reyranella
7d749f531b5daaec30b25614a3f55693	0	0	0	0	0	0	0	0	0	0	0	0	0	0	0	1	0	0	0	0	0	0	0	0	1	0	0	0	0	0	0	0	0	0	1	0	D_0__Bacteria;D_1__Proteobacteria;D_2__Gammaproteobacteria;D_3__Xanthomonadales
1c5992f45f4bd29ac699ee4567844857	0	0	0	2	0	0	0	7	1	4	0	0	0	0	0	2	2	0	0	0	0	2	0	0	2	0	0	4	2	0	2	1	0	3	2	2	D_0__Bacteria;D_1__Proteobacteria;D_2__Gammaproteobacteria;D_3__Diplorickettsiales;D_4__Diplorickettsiaceae;D_5__Aquicella
4eb88bd770a9f7999bc91eee1e8f4066	0	0	0	0	0	0	0	0	0	0	0	0	0	0	0	0	0	0	0	2	0	2	0	0	2	0	0	2	0	1	0	0	0	0	0	2	D_0__Bacteria;D_1__Acidobacteria;D_2__Acidobacteriia;D_3__Acidobacteriales;D_4__Acidobacteriaceae (Subgroup 1);D_5__Granulicella
7f05c3a187338c5a9ce7be46992bb67c	0	0	2	0	0	0	0	0	0	0	0	0	0	0	0	0	0	0	0	0	0	0	0	0	0	0	0	0	0	0	0	0	0	0	0	0	D_0__Bacteria;D_1__Bacteroidetes;D_2__Bacteroidia;D_3__Sphingobacteriales;D_4__env.OPS 17;D_5__uncultured Alistipes sp.;D_6__uncultured Alistipes sp.
b0ab39352c2146141d0560008382b40c	0	0	0	0	0	0	0	0	0	0	0	0	0	0	0	0	2	0	2	0	0	0	0	0	0	0	0	0	1	0	0	0	1	1	0	0	D_0__Bacteria;D_1__Proteobacteria;D_2__Gammaproteobacteria;D_3__Betaproteobacteriales;D_4__Burkholderiaceae
dc4401417e9a03ee2c45e559e64ee8fe	9	6	8	3	4	3	0	2	0	9	4	3	8	5	5	1	4	5	10	6	8	11	9	4	2	2	5	7	3	4	7	10	4	1	8	10	D_0__Bacteria;D_1__Proteobacteria;D_2__Alphaproteobacteria;D_3__Rhizobiales;D_4__KF-JG30-B3;D_5__uncultured soil bacterium;D_6__uncultured soil bacterium
a54085f7e37215734d41c33bdd5c7095	0	0	0	0	0	2	2	0	0	0	0	0	0	0	0	0	0	0	0	0	0	0	0	0	0	0	0	0	0	0	0	1	0	0	0	0	D_0__Bacteria;D_1__Bacteroidetes;D_2__Bacteroidia;D_3__Cytophagales;D_4__Microscillaceae;D_5__Ohtaekwangia;D_6__uncultured soil bacterium
7d836564e2636f7a0e5d7897cec825ae	0	0	0	0	0	0	0	0	0	0	0	0	0	0	0	0	0	0	0	0	0	0	0	0	0	0	2	0	0	0	1	0	0	0	0	0	D_0__Bacteria;D_1__Acidobacteria;D_2__Acidobacteriia;D_3__Acidobacteriales;D_4__uncultured;D_5__Acidobacteria bacterium LWQ13;D_6__Acidobacteria bacterium LWQ13
440953266e21876e284845c565a1a7ae	0	0	1	0	0	0	0	4	12	2	2	2	0	0	0	0	0	0	0	0	0	0	0	0	0	3	0	0	2	0	0	0	0	0	0	3	D_0__Bacteria;D_1__Acidobacteria;D_2__Acidobacteriia;D_3__Acidobacteriales;D_4__Koribacteraceae;D_5__Candidatus Koribacter
88a97cb3b5a7e8e13b953ee4409f0996	0	0	0	0	0	0	0	0	0	0	0	0	0	0	0	0	0	0	1	4	0	0	1	0	0	0	1	0	0	0	0	0	0	0	0	0	D_0__Bacteria;D_1__Gemmatimonadetes;D_2__Gemmatimonadetes;D_3__Gemmatimonadales;D_4__Gemmatimonadaceae;D_5__uncultured
50f0cbcda65f8adcd8393dafc5489a9c	0	0	0	0	0	1	0	0	0	0	0	0	0	0	0	1	0	0	0	1	0	0	0	0	1	0	0	0	0	0	0	0	0	0	1	0	D_0__Bacteria;D_1__Actinobacteria;D_2__Thermoleophilia;D_3__Gaiellales;D_4__Gaiellaceae;D_5__Gaiella
14c762f4798ac33a94ac575ea1644b2c	0	1	0	0	0	0	0	0	0	2	0	0	0	0	0	0	0	0	0	0	0	0	0	0	0	0	0	0	0	2	4	0	0	5	0	2	D_0__Bacteria;D_1__Chloroflexi;D_2__Gitt-GS-136;D_3__uncultured Caldilinea sp.;D_4__uncultured Caldilinea sp.;D_5__uncultured Caldilinea sp.;D_6__uncultured Caldilinea sp.
296bc470f4f7cbf6c14ce13f00ebc041	2	0	1	4	3	4	0	4	1	3	1	1	2	2	0	0	0	2	2	0	3	8	0	0	2	2	3	0	0	0	1	1	3	5	2	7	D_0__Bacteria;D_1__Proteobacteria;D_2__Gammaproteobacteria;D_3__Betaproteobacteriales;D_4__Nitrosomonadaceae;D_5__MND1
b6aa3f5a93b4630e53d598151a64df49	4	0	0	0	0	0	0	0	0	0	0	0	0	0	21	0	2	4	0	0	0	0	1	0	0	0	13	0	0	2	0	0	0	0	0	0	D_0__Bacteria;D_1__Proteobacteria;D_2__Gammaproteobacteria;D_3__Pseudomonadales;D_4__Pseudomonadaceae;D_5__Pseudomonas
a5c04d3b3d0ca1c82ada3b20213144cc	0	0	0	0	0	0	0	0	0	0	0	0	0	0	0	0	0	2	0	0	0	0	0	0	1	2	0	0	2	0	0	0	0	0	0	0	D_0__Bacteria;D_1__Bacteroidetes;D_2__Bacteroidia;D_3__Chitinophagales;D_4__Saprospiraceae;D_5__Phaeodactylibacter;D_6__uncultured Haliscomenobacter sp.
f7c3d19dfc2e0c158e68a83919b3a7a9	2	0	3	4	0	0	0	0	0	0	1	0	0	0	0	0	0	0	0	0	0	0	0	0	0	0	0	0	0	0	1	0	0	1	1	0	D_0__Bacteria;D_1__Bacteroidetes;D_2__Bacteroidia;D_3__Sphingobacteriales
4e2d067af248bc39953954a16990d255	0	2	0	1	0	0	0	0	3	0	0	0	0	0	0	0	0	0	0	0	0	0	0	0	0	0	0	0	0	0	0	0	0	0	0	0	D_0__Bacteria;D_1__Bacteroidetes;D_2__Bacteroidia;D_3__Chitinophagales;D_4__Chitinophagaceae
6f8ea176e7c09a7516dcea4a5220e5b1	19	13	11	19	14	11	10	6	10	7	13	7	11	25	14	25	27	4	2	9	9	19	4	27	14	7	8	12	11	5	0	8	3	3	3	6	D_0__Bacteria;D_1__Proteobacteria;D_2__Alphaproteobacteria;D_3__Elsterales;D_4__Elsteraceae;D_5__uncultured;D_6__uncultured Rhodospirillaceae bacterium
cc19f666489581bed62e6b1eec10fdcf	1	0	0	0	0	0	2	1	0	0	0	2	0	0	0	0	3	1	0	0	0	1	2	3	0	1	2	0	0	0	0	0	0	1	0	0	D_0__Bacteria;D_1__Actinobacteria;D_2__Actinobacteria;D_3__Micrococcales;D_4__Cellulomonadaceae;D_5__Cellulomonas
ab821cf4f1172cfda9e5f51df3cf155c	0	2	0	0	0	0	0	0	0	0	2	0	0	0	0	0	0	0	0	0	0	0	0	0	0	2	0	0	1	0	0	0	0	0	0	0	D_0__Bacteria;D_1__Proteobacteria;D_2__Alphaproteobacteria;D_3__Rickettsiales;D_4__SM2D12;D_5__uncultured Bradyrhizobium sp.;D_6__uncultured Bradyrhizobium sp.
367af6a8d3d1fce6fbd96821e293d2ed	0	0	0	2	1	0	0	0	0	0	0	0	0	0	0	0	4	2	0	0	1	0	0	0	0	1	0	0	0	0	0	0	0	1	0	0	D_0__Bacteria;D_1__Proteobacteria;D_2__Gammaproteobacteria;D_3__Betaproteobacteriales;D_4__Nitrosomonadaceae;D_5__mle1-7;D_6__uncultured Burkholderiales bacterium
383ccb452dd6647c3d7469007c947702	0	3	1	1	1	1	0	0	0	0	0	0	0	0	0	0	0	0	2	0	0	1	0	2	0	0	0	0	0	0	0	1	3	0	2	0	D_0__Bacteria;D_1__Verrucomicrobia;D_2__Verrucomicrobiae;D_3__Pedosphaerales;D_4__Pedosphaeraceae
0b7f8a288f5487193f46a89931397ec0	0	0	0	0	1	0	0	0	0	0	0	0	0	0	3	0	3	0	0	0	0	0	0	0	1	0	0	0	2	1	0	0	0	0	0	0	D_0__Bacteria;D_1__Gemmatimonadetes;D_2__Gemmatimonadetes;D_3__Gemmatimonadales;D_4__Gemmatimonadaceae;D_5__uncultured
fcbfcc57cfe54eb9539e8f1d9cd7afd5	0	4	3	2	3	4	0	5	1	5	0	2	1	1	0	0	0	2	5	0	0	0	1	2	0	5	3	0	3	2	0	0	2	3	0	0	D_0__Bacteria;D_1__Proteobacteria;D_2__Gammaproteobacteria;D_3__Steroidobacterales;D_4__Steroidobacteraceae;D_5__uncultured;D_6__uncultured Xanthomonadales bacterium
2a022eb76c70cd92911f9ee365a83e94	0	0	0	0	0	3	0	0	0	0	0	0	0	0	0	0	2	0	0	0	0	1	0	0	0	1	0	0	0	3	0	0	0	0	0	0	D_0__Bacteria;D_1__Acidobacteria;D_2__Acidobacteriia;D_3__Solibacterales;D_4__Solibacteraceae (Subgroup 3);D_5__Candidatus Solibacter
8d60740b2ab47f528677abaf3d3935a2	0	0	0	0	0	0	0	0	0	0	1	2	0	0	0	0	0	0	1	0	1	1	0	0	0	0	0	0	0	0	0	0	0	0	0	0	D_0__Bacteria;D_1__Acidobacteria;D_2__Subgroup 6
1002ec63368e27d7df2bf4360d5969b8	0	1	1	0	0	0	2	2	0	0	0	0	2	0	0	5	0	0	0	2	0	0	0	0	0	0	0	0	0	0	0	0	1	0	0	0	D_0__Bacteria;D_1__Chloroflexi;D_2__OLB14
5bbfecc4464af720fa56f474f5e006c8	0	0	2	0	0	0	0	2	2	2	2	1	1	6	0	2	0	1	1	1	0	0	0	0	0	0	0	0	0	1	1	0	2	0	0	0	D_0__Bacteria;D_1__Proteobacteria;D_2__Gammaproteobacteria;D_3__Diplorickettsiales;D_4__Diplorickettsiaceae;D_5__Aquicella
9bbd9d9565f2cf893f857ec945fdd39f	2	0	0	1	0	0	2	2	2	0	1	3	4	2	0	4	3	0	0	0	0	1	0	2	0	0	0	0	0	3	0	0	0	0	2	1	D_0__Bacteria;D_1__Acidobacteria;D_2__Acidobacteriia;D_3__Acidobacteriales;D_4__Koribacteraceae;D_5__Candidatus Koribacter
00ebeded38cdefc02879ced6ed43f609	0	0	0	2	1	0	3	2	0	3	0	0	5	1	1	0	0	0	2	0	2	0	2	0	0	0	1	0	2	4	0	0	2	4	3	1	D_0__Bacteria;D_1__Gemmatimonadetes;D_2__Gemmatimonadetes;D_3__Gemmatimonadales;D_4__Gemmatimonadaceae;D_5__Gemmatimonas
e1dd9c84452628e5db14cb5b955b4a37	0	0	4	0	2	0	0	2	0	0	1	1	0	7	2	0	3	18	12	0	5	3	4	6	5	11	8	4	5	2	2	4	0	1	3	2	D_0__Bacteria;D_1__Proteobacteria;D_2__Alphaproteobacteria;D_3__Sphingomonadales;D_4__Sphingomonadaceae
d131a32fcd6018d1b94bd1a29753aeda	136	232	161	162	215	178	152	133	163	205	148	198	99	83	58	40	156	174	170	111	119	216	130	107	64	96	94	114	77	70	178	168	212	142	130	125	D_0__Bacteria;D_1__Proteobacteria;D_2__Alphaproteobacteria;D_3__Rhizobiales;D_4__Xanthobacteraceae;D_5__Pseudolabrys;D_6__uncultured Caulobacterales bacterium
fd9f833c7d9bd3afd38a132adc2bdcee	0	0	0	0	0	0	0	0	0	0	0	0	0	0	0	0	0	0	0	0	0	0	0	0	0	0	0	0	2	0	4	0	0	1	1	0	D_0__Bacteria;D_1__Firmicutes;D_2__Bacilli;D_3__Bacillales;D_4__Planococcaceae
55b5a226ce446e9190f10a5361eb78fb	0	0	0	0	0	0	0	5	0	0	2	0	0	0	0	0	0	0	0	0	0	0	0	0	1	0	0	0	0	0	0	0	0	0	0	0	D_0__Bacteria;D_1__Proteobacteria;D_2__Gammaproteobacteria;D_3__Betaproteobacteriales;D_4__Methylophilaceae
2f4905afacb009c4e3633af5e5bd599a	0	0	0	3	0	0	0	0	0	0	0	0	0	0	5	1	0	0	0	0	0	2	0	0	2	0	0	0	0	0	0	0	0	0	0	0	D_0__Bacteria;D_1__Actinobacteria;D_2__Acidimicrobiia;D_3__IMCC26256;D_4__actinobacterium BGR 88;D_5__actinobacterium BGR 88;D_6__actinobacterium BGR 88
b8e8232f2efb402bcb346e1e204a30b1	0	0	0	0	0	3	0	0	0	1	0	0	0	0	0	0	0	0	0	0	0	0	0	0	0	0	0	0	0	0	0	0	0	0	0	1	D_0__Bacteria;D_1__Proteobacteria;D_2__Alphaproteobacteria;D_3__Elsterales;D_4__uncultured
4d730d1deb1e2583025f4b30bc88cfce	0	0	0	0	0	0	0	0	0	0	0	0	0	0	0	0	2	0	0	0	0	1	0	8	0	0	0	0	0	0	0	0	0	0	0	0	D_0__Bacteria;D_1__Proteobacteria;D_2__Gammaproteobacteria;D_3__Diplorickettsiales;D_4__Diplorickettsiaceae;D_5__Aquicella
f1887307f34f4f859e9ab12a66231171	0	1	1	0	0	5	0	6	0	0	3	0	0	1	0	0	0	0	0	0	4	0	2	2	0	1	0	2	0	0	2	2	0	1	0	4	D_0__Bacteria;D_1__Acidobacteria;D_2__Subgroup 6
91eeac124b085d47ea86f19c2a76cc49	0	0	0	0	0	0	0	0	0	0	0	0	0	0	0	0	0	0	0	0	0	0	0	0	0	0	0	0	0	3	1	0	1	0	2	1	D_0__Bacteria;D_1__Nitrospirae;D_2__Thermodesulfovibrionia;D_3__uncultured;D_4__marine sediment metagenome;D_5__marine sediment metagenome;D_6__marine sediment metagenome
89d4c05fd54975ff8ab311ee4cac221a	0	0	0	0	0	0	0	0	0	0	0	0	3	0	0	0	0	0	2	0	0	0	0	0	0	0	0	3	0	0	0	0	0	0	0	0	D_0__Bacteria;D_1__Actinobacteria;D_2__Acidimicrobiia;D_3__Microtrichales
e6175e9c88ed72a002d6f1fbec19a652	0	0	0	0	0	0	0	0	0	0	0	0	0	0	2	0	0	0	1	2	0	0	2	0	1	0	1	0	0	0	0	0	0	0	0	0	D_0__Bacteria;D_1__Actinobacteria;D_2__Actinobacteria;D_3__Propionibacteriales;D_4__Nocardioidaceae;D_5__Nocardioides
9d4167298fd9578d0bb7c55d04a5dc06	1	7	5	4	5	6	5	9	4	7	3	10	0	0	0	0	0	0	0	0	0	0	0	2	0	0	0	0	0	0	8	3	4	4	8	4	D_0__Bacteria;D_1__Proteobacteria;D_2__Alphaproteobacteria;D_3__Rhizobiales;D_4__Xanthobacteraceae
5e135340518cba5802c63afe0d4b6272	0	0	0	0	2	0	0	0	0	1	0	0	0	0	0	3	0	0	0	0	0	0	0	0	0	0	0	0	0	0	0	0	0	0	0	0	D_0__Bacteria;D_1__Actinobacteria;D_2__Thermoleophilia;D_3__Gaiellales;D_4__Gaiellaceae;D_5__Gaiella;D_6__uncultured Conexibacteraceae bacterium
6b128e115addaee4c44a99172d73dcae	0	0	0	0	0	0	0	0	0	0	0	0	0	0	0	0	0	0	0	0	0	0	0	0	0	0	0	0	0	0	0	0	0	0	0	2	D_0__Bacteria;D_1__Proteobacteria;D_2__Gammaproteobacteria;D_3__Xanthomonadales;D_4__Xanthomonadaceae
221d8e9f99cb7affcd1c48536570ae4c	0	0	0	0	0	0	0	0	0	0	1	0	0	0	0	0	0	0	0	0	0	0	0	0	0	3	1	0	2	0	0	0	0	0	0	0	D_0__Bacteria;D_1__Actinobacteria;D_2__Acidimicrobiia;D_3__Microtrichales;D_4__Ilumatobacteraceae
42b84ad79c6c8885bd2d8449f6bbd956	0	0	0	0	0	0	0	0	4	0	2	0	1	0	1	0	0	0	0	0	0	0	0	0	0	0	0	0	0	0	2	0	0	1	1	0	D_0__Bacteria;D_1__Proteobacteria;D_2__Alphaproteobacteria;D_3__Reyranellales;D_4__Reyranellaceae;D_5__Reyranella
229ee80032add373eaac0ded0871b34e	0	0	0	0	0	0	0	0	4	0	0	0	0	0	0	0	0	0	0	0	0	0	0	0	2	0	0	0	0	0	0	0	0	0	2	0	D_0__Bacteria;D_1__Acidobacteria;D_2__Acidobacteriia;D_3__Acidobacteriales;D_4__uncultured;D_5__bacterium Ellin6527;D_6__bacterium Ellin6527
d18bed513c41e30954fec67e30d66390	1	1	0	0	1	2	0	0	0	0	0	0	1	0	0	0	0	2	0	1	0	0	0	0	0	0	0	3	0	0	0	2	0	1	0	0	D_0__Bacteria;D_1__Proteobacteria;D_2__Alphaproteobacteria;D_3__Rhizobiales;D_4__Xanthobacteraceae;D_5__Pseudolabrys;D_6__uncultured Caulobacterales bacterium
626ba3e40b5759b014180d3d34053f96	0	0	0	0	0	0	0	0	0	0	0	0	0	0	5	0	3	0	1	2	0	1	0	0	0	0	0	0	0	0	0	0	0	0	0	0	D_0__Bacteria;D_1__Bacteroidetes;D_2__Bacteroidia;D_3__Sphingobacteriales;D_4__Sphingobacteriaceae
ca35c6fe889af2de6c8e45346ad32baa	0	0	2	0	2	2	1	1	0	2	0	0	0	0	3	3	2	1	0	2	0	0	0	0	0	6	0	0	0	0	1	0	2	1	3	0	D_0__Bacteria;D_1__Proteobacteria;D_2__Alphaproteobacteria;D_3__Sphingomonadales;D_4__Sphingomonadaceae
8ae8da210e4bd832d806efa4dbe1d9fb	0	0	0	0	1	2	0	0	0	0	2	0	2	0	0	0	0	0	0	0	0	0	0	1	1	0	5	0	0	0	1	1	1	2	0	0	D_0__Bacteria;D_1__Proteobacteria;D_2__Gammaproteobacteria;D_3__Xanthomonadales;D_4__Xanthomonadaceae;D_5__Arenimonas;D_6__Arenimonas daechungensis
d55caab4f1def8801d01125126c425ab	0	0	0	0	0	0	0	1	19	0	1	0	0	0	1	1	0	0	0	0	0	0	0	0	0	0	0	0	0	1	0	0	0	1	3	1	D_0__Bacteria;D_1__Proteobacteria;D_2__Gammaproteobacteria;D_3__Xanthomonadales
354b20b10d501d93c5815ab40091b805	0	1	0	1	2	0	0	1	0	0	0	0	0	0	0	0	3	2	0	5	0	5	2	0	0	0	2	0	3	0	0	2	0	2	0	0	D_0__Bacteria;D_1__Proteobacteria;D_2__Deltaproteobacteria;D_3__RCP2-54;D_4__uncultured Desulfuromonadales bacterium;D_5__uncultured Desulfuromonadales bacterium;D_6__uncultured Desulfuromonadales bacterium
7d727191aa0320c5caf2200255825590	0	0	0	0	0	0	0	1	0	0	0	1	7	0	2	0	0	0	1	3	2	0	0	0	0	0	0	0	0	0	0	0	0	0	0	0	D_0__Bacteria;D_1__Verrucomicrobia;D_2__Verrucomicrobiae;D_3__Pedosphaerales;D_4__Pedosphaeraceae
d7f50d7334b6887975e97aa49d0d2177	1	1	1	2	2	0	0	4	0	3	2	1	2	0	0	1	0	3	0	5	2	2	2	0	0	0	3	0	0	0	4	0	2	3	3	2	D_0__Bacteria;D_1__Proteobacteria;D_2__Alphaproteobacteria;D_3__Caulobacterales;D_4__Hyphomonadaceae;D_5__SWB02
6f404fdca6a8f9627b2b64c41cb48766	0	0	0	0	0	0	0	0	0	0	0	1	0	0	0	0	0	0	0	0	0	0	0	0	0	2	0	0	0	0	3	0	0	0	0	0	D_0__Bacteria;D_1__Actinobacteria;D_2__Acidimicrobiia;D_3__IMCC26256;D_4__uncultured organism;D_5__uncultured organism;D_6__uncultured organism
24f78d3dc29d73faea5ef8712770c9d2	1	0	0	0	0	0	1	0	0	0	0	0	0	0	0	0	0	0	0	0	0	0	0	0	0	0	0	0	0	0	0	0	2	0	0	0	D_0__Bacteria;D_1__Bacteroidetes;D_2__Bacteroidia;D_3__Cytophagales;D_4__Cyclobacteriaceae
786ad26802cf5c3fcc3b002d2292a406	0	0	0	0	0	0	0	0	0	0	0	0	1	0	4	0	0	3	0	0	0	0	4	1	0	3	1	0	0	0	1	0	0	0	0	0	D_0__Bacteria;D_1__Gemmatimonadetes;D_2__Gemmatimonadetes;D_3__Gemmatimonadales;D_4__Gemmatimonadaceae;D_5__uncultured
2a08e39a125fe08250c5e8fcfa7b976b	0	0	0	0	0	0	0	0	0	0	0	1	0	0	0	0	0	0	0	0	0	0	0	0	0	0	4	0	0	2	0	0	1	0	1	0	D_0__Bacteria;D_1__Acidobacteria;D_2__Acidobacteriia;D_3__Solibacterales;D_4__Solibacteraceae (Subgroup 3);D_5__Bryobacter
6fad5f3da35a5bb1f33756df4aab8790	1	0	2	0	2	1	0	0	0	0	0	0	0	3	0	0	0	0	0	0	0	0	0	0	0	0	0	0	0	0	0	1	0	0	0	0	D_0__Bacteria;D_1__Proteobacteria;D_2__Gammaproteobacteria;D_3__CCD24
e46f22a95dd6af670bbbe38d3485b742	0	0	1	0	0	0	1	0	0	0	0	1	0	0	0	0	0	0	0	0	0	0	0	0	0	0	0	0	0	0	0	0	0	0	0	0	D_0__Bacteria;D_1__Proteobacteria;D_2__Gammaproteobacteria;D_3__Betaproteobacteriales;D_4__Burkholderiaceae
b2a790c187777972a14104989e3c9409	0	0	0	0	0	0	0	0	0	0	0	0	0	0	2	0	0	1	0	0	1	0	0	6	0	1	0	0	0	0	0	0	0	0	0	0	D_0__Bacteria;D_1__Actinobacteria;D_2__Actinobacteria;D_3__Pseudonocardiales;D_4__Pseudonocardiaceae;D_5__Amycolatopsis
22be27f8b5879587ead67e938901355f	0	0	1	0	0	0	0	0	0	0	0	0	0	0	0	0	0	0	0	0	0	0	2	0	0	0	0	0	2	0	1	0	0	0	0	0	D_0__Bacteria;D_1__Proteobacteria;D_2__Gammaproteobacteria;D_3__Betaproteobacteriales;D_4__A21b
e5735e261a6daf25705975031828e033	4	6	2	7	8	7	4	3	5	2	4	3	1	4	4	6	2	9	14	4	2	5	2	3	6	11	3	2	2	6	4	4	10	7	3	2	D_0__Bacteria;D_1__Proteobacteria;D_2__Alphaproteobacteria;D_3__Acetobacterales;D_4__Acetobacteraceae
d0c13023b7762c31a3032e3d275932ab	0	1	2	0	0	3	0	1	2	0	1	2	0	4	0	0	0	0	1	0	2	6	0	0	0	0	0	0	0	0	1	3	0	2	1	1	D_0__Bacteria;D_1__Acidobacteria;D_2__Subgroup 6
9b3178ce369187d280c9af232a7eebf3	0	0	0	0	0	0	0	0	0	0	0	1	1	0	0	0	0	0	0	0	0	0	3	0	0	0	0	0	0	0	0	0	0	0	0	0	D_0__Bacteria;D_1__Actinobacteria;D_2__Actinobacteria;D_3__Propionibacteriales;D_4__Nocardioidaceae;D_5__Nocardioides
d3d1c3f444529f431d88629209b51977	0	0	0	0	0	0	0	0	0	0	0	0	0	0	0	0	3	0	0	0	0	7	0	0	0	0	0	0	0	0	0	0	0	0	0	0	D_0__Bacteria;D_1__Firmicutes;D_2__Bacilli;D_3__Lactobacillales;D_4__Lactobacillaceae;D_5__Lactobacillus
e4664e79c6b1fc8d7379890d4780484c	0	0	0	0	0	0	0	0	0	0	0	0	0	0	0	2	2	0	0	0	0	0	0	0	2	0	0	0	3	1	0	0	0	0	0	0	D_0__Bacteria;D_1__Proteobacteria;D_2__Alphaproteobacteria;D_3__Rhizobiales;D_4__Rhizobiales Incertae Sedis;D_5__Bauldia
f66fa599e104af5d5fa6ed3226c2528b	0	1	1	0	0	0	0	0	0	0	0	1	1	0	0	0	2	1	1	2	2	3	2	0	0	0	2	0	0	0	1	4	0	1	0	1	D_0__Bacteria
e7f2bcad23cd6bc88bc4f5131d205400	0	0	0	0	0	0	5	0	0	0	0	0	0	0	0	0	0	0	0	0	0	1	0	0	1	0	0	0	0	0	0	0	0	0	0	0	D_0__Bacteria;D_1__Actinobacteria;D_2__Actinobacteria;D_3__Propionibacteriales;D_4__Nocardioidaceae;D_5__Kribbella
e3fb00925650bca36e94105e6bdaa482	0	0	0	1	1	0	2	1	0	2	2	1	0	0	0	0	0	0	0	0	0	0	0	1	0	0	0	0	0	0	1	0	2	1	1	2	D_0__Bacteria;D_1__Proteobacteria;D_2__Alphaproteobacteria;D_3__Rhizobiales;D_4__Rhizobiales Incertae Sedis;D_5__Bauldia
fe352e043eb9905304f645a1269b2921	0	0	0	0	2	0	0	0	1	0	0	0	0	0	0	0	0	0	0	0	0	0	0	0	0	0	0	0	0	0	0	0	0	0	0	0	D_0__Bacteria;D_1__Proteobacteria;D_2__Gammaproteobacteria;D_3__Betaproteobacteriales;D_4__SC-I-84
cc1b56dc83eaa182782059f1d3c297a0	0	0	0	0	0	0	0	0	2	0	0	0	0	0	0	0	0	0	0	0	0	0	0	0	0	0	0	0	0	0	0	0	0	0	0	0	D_0__Bacteria;D_1__Acidobacteria;D_2__Acidobacteriia;D_3__Acidobacteriales;D_4__Acidobacteriaceae (Subgroup 1)
67cb862e5c23386ddce7a5d2ee14e4cd	4	0	1	0	0	1	0	0	0	0	0	1	0	0	0	0	0	0	0	0	0	0	0	0	0	0	0	0	0	0	0	0	0	0	0	0	D_0__Bacteria;D_1__Actinobacteria;D_2__Actinobacteria;D_3__Micrococcales;D_4__Dermatophilaceae;D_5__uncultured;D_6__uncultured actinobacterium
6768200e53f358ce6a2b4d90e0c7a7d5	0	1	7	1	2	0	0	0	0	0	2	1	3	0	0	0	0	0	1	3	0	2	3	0	0	1	4	7	1	0	0	12	3	1	1	6	D_0__Bacteria;D_1__Acidobacteria;D_2__Blastocatellia (Subgroup 4);D_3__Pyrinomonadales;D_4__Pyrinomonadaceae;D_5__RB41;D_6__uncultured bacterium gp4
a306bc09ebf39bf98daa20e88ba54a00	0	0	0	0	0	0	0	0	0	0	1	0	0	0	0	0	0	0	0	0	0	0	0	0	0	0	0	0	0	0	2	0	2	0	0	1	D_0__Bacteria;D_1__Acidobacteria;D_2__Holophagae;D_3__Subgroup 7;D_4__uncultured Desulfovirga sp.;D_5__uncultured Desulfovirga sp.;D_6__uncultured Desulfovirga sp.
25bb7115dbb3c88aba98ad02635aaf44	0	0	2	0	1	0	7	0	0	0	4	0	0	0	0	1	0	0	0	0	0	0	0	1	4	0	0	0	0	0	4	0	0	2	0	2	D_0__Bacteria;D_1__Bacteroidetes;D_2__Bacteroidia;D_3__Flavobacteriales;D_4__Flavobacteriaceae;D_5__Flavobacterium
bd76d12f994d943b4038ec0db0e164e6	0	0	0	0	0	0	0	0	0	0	0	0	1	2	0	2	5	3	5	1	0	1	5	0	0	8	1	4	6	2	0	1	0	0	0	0	D_0__Bacteria;D_1__Chloroflexi;D_2__KD4-96;D_3__uncultured Longilinea sp.;D_4__uncultured Longilinea sp.;D_5__uncultured Longilinea sp.;D_6__uncultured Longilinea sp.
a2ca85fcc42793505c25f738ca53fe92	0	0	0	0	0	0	0	0	0	0	0	0	0	0	0	0	0	0	0	2	0	0	0	0	1	0	0	0	0	1	0	0	0	0	0	1	D_0__Bacteria;D_1__Proteobacteria;D_2__Alphaproteobacteria;D_3__Azospirillales;D_4__Inquilinaceae;D_5__Inquilinus
bcbe82541da30faca97f144fb9fa4249	0	0	0	2	0	0	0	0	0	0	0	0	0	0	0	0	0	0	0	0	0	0	0	0	0	0	0	0	0	0	1	3	0	0	0	0	D_0__Bacteria;D_1__Bacteroidetes;D_2__Bacteroidia;D_3__Flavobacteriales;D_4__Flavobacteriaceae;D_5__Flavobacterium
6de552cf8932e255dd2feb2d1a8c4eae	0	0	0	0	0	0	0	0	0	0	0	0	0	0	0	0	0	0	0	2	0	0	0	3	2	2	0	0	0	6	0	0	0	0	0	0	D_0__Bacteria;D_1__Acidobacteria;D_2__Acidobacteriia;D_3__Solibacterales;D_4__Solibacteraceae (Subgroup 3);D_5__Bryobacter;D_6__uncultured actinobacterium
dd4608733ce959ee75bf25f9ed742ed7	1	0	0	0	2	0	0	0	0	0	0	2	0	0	0	0	0	0	0	0	0	0	0	0	0	0	2	0	0	0	0	1	0	0	1	0	D_0__Bacteria;D_1__Proteobacteria;D_2__Alphaproteobacteria;D_3__Acetobacterales;D_4__Acetobacteraceae
0080f1d71a2beb779fb9e98e06dfe1be	0	0	0	0	0	0	0	0	0	0	0	0	2	2	13	1	2	2	0	0	0	2	3	0	6	8	2	6	6	2	3	1	2	2	4	7	D_0__Bacteria;D_1__Bacteroidetes;D_2__Bacteroidia;D_3__Cytophagales;D_4__Cyclobacteriaceae
cebe465f7cc42422a772ea6418107643	0	2	1	0	1	0	1	5	0	1	3	3	0	0	0	0	0	0	1	2	1	1	5	0	1	0	2	0	0	0	1	0	2	2	0	0	D_0__Bacteria
6a7ac501f32ab9510dd279aebaa2212b	10	0	4	0	2	3	2	0	3	2	3	1	0	7	6	3	0	6	0	6	1	2	1	0	7	4	1	2	9	6	3	2	3	3	2	0	D_0__Bacteria;D_1__Proteobacteria;D_2__Gammaproteobacteria;D_3__Xanthomonadales;D_4__Xanthomonadaceae;D_5__Arenimonas;D_6__Arenimonas daechungensis
52daf24b34906266595e78a5f48fbde3	0	0	1	0	0	0	1	0	0	0	1	0	0	0	0	0	0	2	2	0	0	0	0	1	1	0	1	0	0	0	0	0	0	0	0	0	D_0__Bacteria;D_1__Proteobacteria;D_2__Alphaproteobacteria;D_3__Micropepsales;D_4__Micropepsaceae;D_5__uncultured
5b8b1a80b6561cafea92a1d4666d383d	1	0	0	0	0	0	2	0	0	1	1	0	0	0	0	0	0	0	0	0	0	0	0	0	0	0	0	0	0	0	0	0	1	0	0	1	D_0__Bacteria;D_1__Bacteroidetes;D_2__Bacteroidia;D_3__Flavobacteriales;D_4__Flavobacteriaceae;D_5__Flavobacterium
e13efbb955518bac8ecd1fea86cea8d4	2	0	0	0	0	0	0	0	0	0	0	0	0	2	2	4	2	0	0	0	0	0	2	2	1	0	0	0	2	0	1	0	1	0	0	0	D_0__Bacteria;D_1__Proteobacteria;D_2__Alphaproteobacteria;D_3__Sphingomonadales;D_4__Sphingomonadaceae;D_5__Sphingopyxis
c23e185c10b0e0f5fd2ed708a7522f74	0	0	0	1	0	0	0	1	2	1	1	3	0	6	3	0	0	12	2	1	6	0	2	5	3	6	2	2	0	2	2	3	0	3	0	2	D_0__Bacteria;D_1__Bacteroidetes;D_2__Bacteroidia;D_3__Chitinophagales;D_4__Chitinophagaceae
82719c44c37aed116e629b83a886d95b	0	0	0	0	0	0	0	0	0	0	0	0	0	0	0	0	0	0	0	0	0	0	0	0	0	0	8	0	2	0	0	0	1	0	0	0	D_0__Bacteria
dd951f34eaa9e07822118f85851b2aa8	0	0	0	0	1	0	2	0	1	0	0	0	0	0	0	0	0	0	0	0	0	0	0	0	0	0	0	0	0	0	0	0	0	0	0	0	D_0__Bacteria;D_1__Acidobacteria;D_2__Acidobacteriia;D_3__Acidobacteriales;D_4__Acidobacteriaceae (Subgroup 1)
3c95473993ea45f65f3761204ac2284e	4	1	8	2	2	0	0	0	0	0	0	0	0	0	0	0	0	4	0	0	0	0	0	0	0	0	2	0	0	0	0	0	0	0	0	0	D_0__Bacteria;D_1__Verrucomicrobia;D_2__Verrucomicrobiae;D_3__Pedosphaerales;D_4__Pedosphaeraceae;D_5__ADurb.Bin063-1
57b3f930939edd9b8d27ec9dca1a47ec	0	0	0	0	0	0	0	0	0	0	0	0	1	0	0	0	2	0	0	0	0	0	0	1	3	0	0	2	0	2	0	0	0	0	0	0	D_0__Bacteria;D_1__Proteobacteria;D_2__Gammaproteobacteria;D_3__Betaproteobacteriales;D_4__Burkholderiaceae;D_5__Cupriavidus
9fb9ee6cc39b1d89db5e93a4bb38e570	0	0	0	0	0	0	0	0	0	0	2	13	0	0	0	0	0	0	0	0	0	0	0	0	0	0	0	0	0	0	0	0	0	0	0	0	D_0__Bacteria;D_1__Patescibacteria;D_2__Saccharimonadia;D_3__Saccharimonadales
6b08f97fd69695aa81c5d81f7e20e3a1	1	2	0	0	1	0	0	0	0	0	0	0	0	0	0	0	0	0	0	0	0	1	0	0	0	0	0	0	0	0	0	0	2	0	0	0	D_0__Bacteria;D_1__Acidobacteria;D_2__Blastocatellia (Subgroup 4);D_3__11-24;D_4__uncultivated soil bacterium clone S111;D_5__uncultivated soil bacterium clone S111;D_6__uncultivated soil bacterium clone S111
6006471e9986a0ed90e593e7a1b34087	0	0	0	0	0	0	0	0	0	0	0	0	0	0	0	0	0	0	0	0	2	0	1	0	0	0	0	3	0	2	0	0	0	1	0	0	D_0__Bacteria;D_1__Gemmatimonadetes;D_2__Gemmatimonadetes;D_3__Gemmatimonadales;D_4__Gemmatimonadaceae;D_5__Gemmatimonas
7ff0c3bfd919773164b15f9958632b84	0	0	0	0	0	0	0	0	0	0	0	0	1	0	0	0	4	0	0	2	0	0	1	0	0	0	0	1	0	0	0	0	0	0	0	0	D_0__Bacteria;D_1__Proteobacteria;D_2__Gammaproteobacteria;D_3__Xanthomonadales;D_4__Xanthomonadaceae;D_5__Lysobacter
ac5f707e92e269fad26ad7619b065e5b	4	4	4	13	6	1	6	0	1	3	5	5	16	9	6	6	13	4	31	4	9	4	7	10	9	9	9	6	5	6	2	2	2	1	2	4	D_0__Bacteria;D_1__Acidobacteria;D_2__Acidobacteriia;D_3__Solibacterales;D_4__Solibacteraceae (Subgroup 3);D_5__Candidatus Solibacter
bae6dfddb1017d6af1ee8d1499704e2a	0	3	0	0	0	0	1	0	0	0	0	0	0	0	0	0	0	0	0	0	0	0	0	0	0	0	0	0	0	0	0	0	0	0	0	0	D_0__Bacteria;D_1__Chloroflexi;D_2__Dehalococcoidia;D_3__S085;D_4__uncultured bacterium 5G4;D_5__uncultured bacterium 5G4;D_6__uncultured bacterium 5G4
fe50b63bcf48eea7d26e678ea7ecbdae	1	3	2	0	0	0	0	0	0	1	1	2	0	0	0	0	0	0	0	0	0	0	0	0	0	0	0	0	0	0	0	0	0	0	0	0	D_0__Bacteria;D_1__Gemmatimonadetes;D_2__Gemmatimonadetes;D_3__Gemmatimonadales;D_4__Gemmatimonadaceae;D_5__Gemmatimonas
11e4301d328b972b35c09a0a347e7d6d	4	0	7	6	10	5	9	4	4	2	23	14	0	5	10	1	1	16	2	2	10	2	4	0	4	4	6	3	9	9	16	8	27	11	19	3	D_0__Bacteria;D_1__Actinobacteria;D_2__Actinobacteria;D_3__Micrococcales;D_4__Intrasporangiaceae
c7f49269ddba52c3a898a916bac3c9a7	0	0	0	0	0	1	0	0	0	1	0	0	0	0	0	0	0	1	0	0	0	1	0	2	0	2	0	0	0	0	0	0	0	0	0	0	D_0__Bacteria;D_1__Actinobacteria;D_2__Thermoleophilia;D_3__Gaiellales;D_4__uncultured;D_5__bacterium Ellin7530;D_6__bacterium Ellin7530
98cbf05525fb3a6c2a91db850e1a0e1b	0	0	0	0	0	0	0	0	0	0	0	1	0	0	0	0	0	0	0	1	5	0	0	0	1	0	0	0	0	0	0	0	1	5	0	0	D_0__Bacteria;D_1__Gemmatimonadetes;D_2__Gemmatimonadetes;D_3__Gemmatimonadales;D_4__Gemmatimonadaceae;D_5__uncultured
34ad96f5b250cef600b01ca4399c7ae9	0	0	0	0	0	0	0	0	0	0	0	0	0	0	0	0	0	0	0	3	0	0	0	0	0	0	0	2	0	0	0	0	0	0	0	0	D_0__Bacteria;D_1__Gemmatimonadetes;D_2__Gemmatimonadetes;D_3__Gemmatimonadales;D_4__Gemmatimonadaceae;D_5__Gemmatimonas
39543c19e858adeb444ef19ff28094aa	0	0	0	0	0	0	0	0	0	0	2	0	0	0	0	1	0	1	0	0	2	0	0	0	0	0	0	0	0	0	0	0	0	0	0	0	D_0__Bacteria;D_1__Firmicutes;D_2__Bacilli;D_3__Lactobacillales;D_4__Streptococcaceae;D_5__Streptococcus
890f0b57cd7a131349a864480afd1ff1	0	1	0	0	3	0	0	0	0	0	0	0	0	0	3	0	0	0	0	1	0	0	0	0	0	0	0	0	0	0	0	0	1	0	0	0	D_0__Bacteria
77ba61638f6a46ef44e1c1466785915c	0	0	0	0	0	0	0	0	0	0	0	0	8	5	3	3	2	5	11	9	2	3	5	13	4	4	8	8	3	6	0	0	0	0	0	0	D_0__Bacteria;D_1__Proteobacteria;D_2__Gammaproteobacteria;D_3__Betaproteobacteriales;D_4__Nitrosomonadaceae;D_5__mle1-7;D_6__uncultured Burkholderiales bacterium
0091b883a26a0d4cfdff15bd5301a283	0	0	0	0	0	0	0	0	0	0	0	0	0	0	0	0	0	0	0	2	0	2	0	3	0	0	0	0	0	0	0	0	0	0	0	0	D_0__Bacteria;D_1__Proteobacteria;D_2__Gammaproteobacteria
19d9fa13e12bcba94f0c2064e22f09e8	0	0	0	0	0	0	0	0	0	0	0	0	2	0	0	0	0	2	0	0	0	0	1	1	0	0	0	0	0	0	0	0	0	0	0	0	D_0__Bacteria;D_1__Proteobacteria;D_2__Gammaproteobacteria;D_3__Betaproteobacteriales;D_4__TRA3-20
78e69d1089149a0f86036c1faeea14e1	0	0	0	2	0	0	1	0	0	0	0	0	0	0	0	0	0	0	0	0	0	0	0	0	0	0	0	0	0	0	0	0	2	0	0	0	D_0__Bacteria;D_1__Proteobacteria;D_2__Gammaproteobacteria;D_3__Betaproteobacteriales;D_4__SC-I-84
b8a57753c7751b3bda180c5ee5db9435	0	1	3	0	0	0	0	0	0	0	2	0	0	0	0	0	0	2	0	0	3	0	0	0	0	0	0	0	0	0	0	0	0	0	0	0	D_0__Bacteria;D_1__Proteobacteria;D_2__Alphaproteobacteria;D_3__Elsterales;D_4__uncultured
82b09ad2611b43cf2fe46a2055df7d27	0	0	0	0	0	0	0	0	0	0	0	0	2	1	1	1	1	1	1	1	0	2	1	1	5	5	1	1	0	9	0	0	0	0	0	0	D_0__Bacteria;D_1__Proteobacteria;D_2__Gammaproteobacteria;D_3__Xanthomonadales;D_4__Rhodanobacteraceae
115998c0034de9c9d967a7b98f6bd686	0	0	0	1	0	0	0	0	2	0	0	0	0	0	0	0	0	0	0	0	0	0	0	1	0	0	0	0	0	0	0	0	0	6	0	0	D_0__Bacteria;D_1__Proteobacteria;D_2__Alphaproteobacteria
ad613ec586d06d7c73cb562fd488d779	0	1	0	1	0	2	0	1	0	1	1	4	0	3	0	0	0	1	1	0	1	3	0	0	0	0	0	0	0	0	1	1	0	1	2	0	D_0__Bacteria;D_1__Acidobacteria;D_2__Subgroup 6
2a5137e499150e4be4c4597f9bf45641	3	6	0	0	0	0	0	1	0	0	0	0	1	0	0	0	0	0	0	1	0	0	0	0	0	0	0	0	0	0	0	0	3	0	0	0	D_0__Bacteria;D_1__Gemmatimonadetes;D_2__Gemmatimonadetes;D_3__Gemmatimonadales;D_4__Gemmatimonadaceae
be06e857115e3870734a1eca63d0fb1c	0	0	0	0	0	2	0	0	0	0	1	0	0	0	0	0	0	0	0	0	0	0	0	0	0	0	0	0	0	0	0	0	0	0	0	0	D_0__Bacteria;D_1__Actinobacteria;D_2__Actinobacteria;D_3__Pseudonocardiales;D_4__Pseudonocardiaceae;D_5__Pseudonocardia
7b378a04a41892ad067f1becbe083656	0	0	0	0	0	0	0	0	0	0	0	0	0	1	0	0	0	0	0	2	0	0	1	7	0	0	0	0	0	0	2	0	0	0	0	0	D_0__Bacteria;D_1__Proteobacteria;D_2__Alphaproteobacteria;D_3__Micropepsales;D_4__Micropepsaceae;D_5__uncultured
1c78fd1aaafda1adf80a2dee8081e823	0	0	0	0	0	0	0	0	0	0	0	0	0	0	0	0	0	2	0	0	0	2	0	0	0	0	1	0	0	2	2	1	0	0	3	0	D_0__Bacteria;D_1__Acidobacteria;D_2__Acidobacteriia;D_3__Solibacterales;D_4__Solibacteraceae (Subgroup 3);D_5__Candidatus Solibacter
f3f291d499f9986fd8922126b01e276e	0	0	0	0	0	0	1	0	2	0	0	0	0	0	0	0	0	0	0	0	0	0	0	0	2	0	0	0	0	0	0	0	2	4	0	0	D_0__Bacteria;D_1__Proteobacteria;D_2__Deltaproteobacteria;D_3__Myxococcales;D_4__Haliangiaceae;D_5__Haliangium
ca4f1925f789da4baaca456dab013fb2	0	0	0	0	2	0	0	2	0	0	0	0	0	2	0	2	0	0	0	4	0	0	0	0	3	0	0	0	0	0	2	0	0	4	0	0	D_0__Bacteria;D_1__Actinobacteria;D_2__Actinobacteria;D_3__Micrococcales;D_4__Micrococcaceae
3b43b4f7511d8a413a6a608908c701c9	0	0	0	0	0	1	0	0	0	0	0	0	0	0	0	0	0	0	2	1	0	6	0	0	0	0	0	0	0	0	0	1	0	0	0	0	D_0__Bacteria;D_1__Proteobacteria;D_2__Alphaproteobacteria;D_3__uncultured;D_4__alpha proteobacterium LWH5;D_5__alpha proteobacterium LWH5;D_6__alpha proteobacterium LWH5
4c3837dc11f3a2ba0a5aade6178d7446	0	1	0	0	0	0	0	0	0	0	0	0	0	1	4	0	0	0	0	0	0	2	2	0	0	3	0	0	0	0	5	0	0	10	0	2	D_0__Bacteria;D_1__Proteobacteria;D_2__Alphaproteobacteria;D_3__Caulobacterales;D_4__Caulobacteraceae;D_5__Asticcacaulis
b7c97716538fb1c1f01f8507b4e44564	1	0	0	0	0	0	1	0	0	0	0	1	5	0	0	0	4	3	1	0	0	0	0	4	0	4	2	0	0	0	1	2	0	0	0	0	D_0__Bacteria;D_1__Acidobacteria;D_2__Subgroup 5
362f878af6f94f7e4921e37dd7621c71	2	0	0	0	2	0	1	3	1	3	0	1	0	2	3	0	0	6	1	4	3	1	3	1	5	3	7	0	5	4	1	1	0	0	2	1	D_0__Bacteria;D_1__Actinobacteria;D_2__Actinobacteria;D_3__Propionibacteriales;D_4__Nocardioidaceae;D_5__Nocardioides
bc22ac922c02e3c4e65de2a67b6b12b9	3	1	0	0	3	1	0	1	0	2	3	1	0	0	0	0	0	0	0	0	0	0	1	0	1	0	4	0	1	4	0	0	1	0	1	0	D_0__Bacteria;D_1__Proteobacteria;D_2__Alphaproteobacteria;D_3__Rhizobiales;D_4__KF-JG30-B3
5e96de7b227487a44658282b72e4d9d5	0	0	1	0	0	1	1	0	0	0	0	0	0	0	0	0	0	0	0	0	0	0	0	0	0	0	0	0	0	0	1	0	0	1	0	0	D_0__Bacteria;D_1__Proteobacteria;D_2__Gammaproteobacteria;D_3__Betaproteobacteriales;D_4__SC-I-84
e3535869f92b06a47df01ecaab8df5fc	0	1	0	0	0	1	0	0	0	0	0	0	1	0	0	0	0	1	0	2	0	0	0	0	0	0	0	2	0	0	0	0	0	0	0	0	D_0__Bacteria;D_1__Firmicutes;D_2__Clostridia;D_3__Clostridiales;D_4__Clostridiaceae 1
07546f470bed43015625fff7c6ce0ef5	0	2	2	1	0	1	0	0	0	1	0	1	1	5	0	3	3	4	0	5	1	0	0	1	0	1	4	1	6	3	1	0	0	1	1	0	D_0__Bacteria;D_1__Proteobacteria;D_2__Alphaproteobacteria;D_3__Acetobacterales;D_4__Acetobacteraceae;D_5__Roseomonas
857182c13111e7e48b9a891560036179	0	2	1	0	2	2	0	0	2	0	2	1	1	0	1	2	0	0	0	1	2	1	7	3	2	6	4	0	2	0	0	1	0	0	1	0	D_0__Bacteria;D_1__Acidobacteria;D_2__Blastocatellia (Subgroup 4);D_3__Blastocatellales;D_4__Blastocatellaceae;D_5__Tellurimicrobium;D_6__Tellurimicrobium multivorans
cea89a1da9e10c614f932fb0198769d7	0	0	0	0	0	0	0	0	0	1	0	0	1	1	0	0	0	0	0	0	0	0	0	0	0	0	0	0	0	0	0	0	2	0	0	0	D_0__Bacteria;D_1__Proteobacteria;D_2__Alphaproteobacteria;D_3__Rhizobiales;D_4__Methyloligellaceae;D_5__uncultured
f8520c34b2afe85bd1d7aa862fb57628	0	0	3	0	0	0	0	0	0	0	0	0	0	0	0	0	0	0	0	0	8	0	0	0	0	0	0	0	0	0	0	1	0	0	0	0	D_0__Bacteria;D_1__Proteobacteria;D_2__Gammaproteobacteria;D_3__Betaproteobacteriales;D_4__Nitrosomonadaceae;D_5__Ellin6067
40202dbd42f484aef3abde27f12c40b7	0	0	0	0	5	1	3	3	0	0	0	0	4	0	3	0	0	14	3	2	5	3	7	0	6	0	0	1	4	4	6	1	0	2	1	0	D_0__Bacteria;D_1__Actinobacteria;D_2__Acidimicrobiia;D_3__Microtrichales;D_4__Iamiaceae;D_5__Iamia;D_6__uncultured Actinomycetales bacterium
78b328f7d9325da267e46f914e1a018b	0	0	0	0	0	1	0	0	0	0	0	0	0	0	0	0	0	0	0	0	0	0	0	0	0	0	0	0	0	0	3	0	0	1	3	0	D_0__Bacteria;D_1__Proteobacteria;D_2__Deltaproteobacteria;D_3__Syntrophobacterales;D_4__Syntrophaceae;D_5__Desulfobacca
3fe5a17cae0d13657ab5e3ee42bfd5c6	0	0	1	0	0	0	0	0	0	0	2	0	0	0	0	0	0	0	0	0	0	0	0	0	0	0	0	0	0	0	3	0	0	2	1	1	D_0__Bacteria;D_1__Actinobacteria;D_2__Thermoleophilia;D_3__Solirubrobacterales;D_4__67-14;D_5__uncultured Solirubrobacter sp.;D_6__uncultured Solirubrobacter sp.
8a24450cc5bb51453f1ef0a2685a2563	10	9	5	9	5	2	7	0	5	7	5	5	5	1	0	1	9	3	5	11	1	2	7	4	4	10	8	5	4	6	5	11	6	9	2	6	D_0__Bacteria;D_1__Acidobacteria;D_2__Subgroup 5
df9bb252583c429e903a631ea976f40c	0	2	0	2	0	0	0	0	0	3	0	0	0	0	0	0	0	0	0	0	0	0	0	0	0	0	0	0	0	0	0	0	0	0	0	0	D_0__Bacteria;D_1__Bacteroidetes;D_2__Bacteroidia
63be2617082658d26bbfe023ba9b3099	0	1	0	0	0	0	1	1	0	3	0	1	2	0	0	3	2	0	0	0	0	3	0	0	0	0	0	0	0	0	0	0	0	0	0	0	D_0__Bacteria;D_1__Acidobacteria;D_2__Thermoanaerobaculia;D_3__Thermoanaerobaculales;D_4__Thermoanaerobaculaceae;D_5__Subgroup 10
67eab8c7877704269b4dbc589a6b9143	0	0	0	0	0	0	0	0	0	0	0	0	0	0	0	0	0	0	0	0	1	1	0	1	0	0	1	0	0	2	0	0	0	0	0	0	D_0__Bacteria;D_1__Acidobacteria;D_2__Acidobacteriia;D_3__Solibacterales;D_4__Solibacteraceae (Subgroup 3)
5711930f2161d0c50980debbfae1539b	0	0	0	0	0	0	0	1	0	0	0	0	0	0	0	0	0	0	0	1	1	0	0	0	0	0	0	0	0	0	0	0	0	0	2	0	D_0__Bacteria;D_1__Actinobacteria;D_2__Actinobacteria;D_3__Propionibacteriales;D_4__Nocardioidaceae;D_5__Nocardioides
2a64a66b927dd301843da38b747133ff	0	1	0	0	5	0	5	1	2	2	3	3	0	1	1	0	0	2	2	0	0	2	3	0	1	1	0	2	3	1	0	0	3	0	0	0	D_0__Bacteria;D_1__Actinobacteria;D_2__Thermoleophilia;D_3__Gaiellales;D_4__Gaiellaceae;D_5__Gaiella
2bba61aa816a5ec16e353f55bfc86399	0	0	0	1	0	0	0	0	0	0	0	0	0	0	0	0	0	0	0	0	0	0	0	0	0	0	2	0	0	0	2	2	0	0	2	3	D_0__Bacteria;D_1__Gemmatimonadetes;D_2__Gemmatimonadetes;D_3__Gemmatimonadales;D_4__Gemmatimonadaceae;D_5__uncultured;D_6__uncultured Pseudomonadales bacterium
91d27231eb75f0176209cf819fdd51fa	0	0	0	0	0	0	0	0	0	0	0	0	2	3	1	0	5	0	1	2	0	1	1	0	0	0	0	0	1	0	0	0	0	0	0	0	D_0__Bacteria;D_1__Proteobacteria;D_2__Gammaproteobacteria;D_3__Betaproteobacteriales
329a033cfa785770a7073cfb0e8c166e	2	0	2	0	2	0	0	1	0	0	5	0	0	0	4	0	3	0	0	0	2	3	3	0	0	3	0	0	0	0	0	0	0	0	6	0	D_0__Bacteria;D_1__Proteobacteria;D_2__Gammaproteobacteria;D_3__Cellvibrionales;D_4__Cellvibrionaceae;D_5__Cellvibrio
58146b67bfc80d5f435874d40458b308	0	0	0	0	0	0	0	0	0	0	0	0	1	1	0	0	0	0	1	0	2	0	3	0	0	1	0	0	0	0	0	0	0	0	0	0	D_0__Bacteria;D_1__Acidobacteria;D_2__Holophagae;D_3__Subgroup 7;D_4__uncultured Desulfovirga sp.;D_5__uncultured Desulfovirga sp.;D_6__uncultured Desulfovirga sp.
784b65998229bef38e5776002ea5d661	7	0	5	0	0	3	2	0	4	5	4	0	1	3	0	0	0	1	0	0	0	0	0	0	0	2	0	2	4	0	2	0	0	0	0	0	D_0__Bacteria;D_1__Bacteroidetes;D_2__Bacteroidia;D_3__Chitinophagales;D_4__Chitinophagaceae;D_5__Sediminibacterium
d41c68b5df2a1ea18ea897f05a9aeec9	0	0	0	0	0	1	1	0	0	0	0	0	0	0	0	0	0	1	0	0	0	0	3	0	0	1	0	2	0	4	0	0	0	0	0	0	D_0__Bacteria;D_1__Proteobacteria;D_2__Gammaproteobacteria;D_3__Xanthomonadales;D_4__Xanthomonadaceae;D_5__Arenimonas;D_6__Arenimonas daechungensis
264030446d2cafad8cf690137190bc64	1	0	4	0	0	0	0	0	0	0	0	0	0	0	1	0	0	0	0	0	0	0	0	0	0	0	0	0	0	0	1	0	0	0	0	0	D_0__Bacteria;D_1__Proteobacteria;D_2__Gammaproteobacteria;D_3__Xanthomonadales;D_4__Xanthomonadaceae;D_5__Stenotrophomonas
ea1c8555525a1aaa4da44f350d9c1543	0	0	0	0	0	0	0	0	0	0	0	0	1	0	1	0	2	0	2	0	1	0	0	0	0	0	0	0	0	5	0	0	0	0	0	0	D_0__Bacteria;D_1__Actinobacteria;D_2__Actinobacteria;D_3__Propionibacteriales;D_4__Nocardioidaceae
e8147fbbd3c2d266faae491f3b10c5af	0	0	0	1	0	0	0	0	0	0	0	0	0	0	0	0	0	0	0	0	0	0	0	0	0	0	1	0	0	0	0	0	0	0	0	0	D_0__Bacteria;D_1__Proteobacteria;D_2__Gammaproteobacteria;D_3__Betaproteobacteriales;D_4__Nitrosomonadaceae;D_5__Ellin6067
8f44690ff402a6965a5c00f813e34054	0	0	0	0	0	0	0	0	0	0	0	0	0	0	0	4	0	0	0	0	0	0	0	0	0	0	0	0	1	0	0	0	0	0	0	0	D_0__Bacteria;D_1__Proteobacteria;D_2__Alphaproteobacteria;D_3__Rhizobiales;D_4__Methyloligellaceae;D_5__uncultured;D_6__alpha proteobacterium LS7-MT
da8e62c77c574a47acfe4ffdc71dda13	0	0	0	0	0	0	0	0	0	0	1	0	0	1	0	0	0	2	0	0	1	1	0	0	0	0	0	0	0	0	0	0	0	0	0	0	D_0__Bacteria;D_1__Proteobacteria;D_2__Deltaproteobacteria;D_3__Myxococcales
b5cca9e8fc0af8de52e38905c62731a9	3	0	2	0	0	0	1	0	0	0	0	0	0	0	0	0	0	0	0	0	0	0	0	0	0	0	0	0	0	0	0	0	0	0	1	0	D_0__Bacteria;D_1__Patescibacteria;D_2__Saccharimonadia;D_3__Saccharimonadales
551171c818d6ea3260c341bc07ac371a	0	3	0	0	0	0	0	0	2	0	0	0	2	0	0	2	2	3	2	3	2	0	4	0	2	3	0	4	1	2	1	1	1	6	1	4	D_0__Bacteria;D_1__Proteobacteria;D_2__Deltaproteobacteria;D_3__MBNT15
a07559086eb772e33f0fc9144746c7c6	0	1	0	0	0	0	0	1	0	1	0	0	0	0	0	0	0	0	0	0	0	0	0	0	0	0	0	0	0	0	0	0	0	0	0	6	D_0__Bacteria;D_1__Acidobacteria;D_2__Holophagae
57e3f1e4613553226b5d7fb4a1044be4	0	0	1	0	0	2	1	0	0	1	0	0	0	0	0	1	0	0	0	0	0	0	0	0	1	0	0	0	0	0	0	0	2	0	1	0	D_0__Bacteria;D_1__Proteobacteria;D_2__Gammaproteobacteria;D_3__Betaproteobacteriales
34db490249411605adbfb59892604792	0	0	0	0	0	0	0	0	0	0	0	0	0	0	0	0	0	0	0	2	0	0	0	0	0	0	0	2	0	0	1	1	0	0	0	0	D_0__Bacteria
787fac7cc2a65fa7f2da73f759c1c967	0	1	2	1	0	0	0	0	0	0	2	0	4	2	3	1	0	3	0	0	2	6	6	3	0	0	0	0	0	3	0	1	0	2	1	3	D_0__Bacteria;D_1__Bacteroidetes;D_2__Bacteroidia;D_3__Chitinophagales;D_4__Chitinophagaceae
5b62491a2f297a5aed3cbff0f99f3fd7	4	1	1	5	6	4	3	7	2	2	5	3	13	11	7	3	4	33	16	7	29	16	23	12	9	10	28	12	3	8	4	9	11	16	8	7	D_0__Bacteria;D_1__Gemmatimonadetes;D_2__Gemmatimonadetes;D_3__Gemmatimonadales;D_4__Gemmatimonadaceae;D_5__Gemmatimonas
69ed1438da95a4de6d416703d2294176	2	4	4	0	0	0	0	0	0	0	0	0	0	1	0	0	4	2	0	0	1	0	0	0	2	0	0	0	0	2	0	1	0	4	1	0	D_0__Bacteria;D_1__Bacteroidetes;D_2__Bacteroidia;D_3__Chitinophagales;D_4__Chitinophagaceae;D_5__Terrimonas
1851f19077d4c7641a53020cd7c55750	0	0	0	2	4	0	0	0	0	0	1	2	1	0	0	0	0	0	0	0	0	0	0	0	0	0	0	0	1	0	0	2	0	0	0	0	D_0__Bacteria;D_1__Actinobacteria;D_2__Thermoleophilia;D_3__Gaiellales;D_4__uncultured;D_5__uncultured bacterium 5G12;D_6__uncultured bacterium 5G12
1667a52fc40222517c57f31f64f7e425	0	0	0	1	0	0	2	1	0	2	2	0	0	0	2	0	3	2	0	1	0	0	0	1	0	0	0	0	0	3	0	0	0	0	2	0	D_0__Bacteria;D_1__Bacteroidetes;D_2__Bacteroidia;D_3__Chitinophagales;D_4__Chitinophagaceae;D_5__uncultured;D_6__Chitinophaga sp. BN130233
9eee3eb85fd4d5b26b675cf563914409	0	0	0	1	2	0	0	0	0	0	0	0	0	3	0	0	0	1	0	0	0	0	0	0	0	1	0	0	0	0	0	0	0	0	0	0	D_0__Bacteria;D_1__Gemmatimonadetes;D_2__Gemmatimonadetes;D_3__Gemmatimonadales;D_4__Gemmatimonadaceae
57a7efb5edb05a9bf9e476db9f721504	0	0	0	0	0	0	0	1	0	3	0	0	1	0	2	0	0	0	0	0	0	0	0	0	0	1	0	0	0	2	0	0	0	0	0	0	D_0__Bacteria;D_1__Latescibacteria;D_2__Latescibacteria;D_3__Latescibacterales;D_4__Latescibacteraceae;D_5__metagenome;D_6__metagenome
e1b48198c83d56115093e4a1ee751f62	0	0	0	0	0	0	0	4	0	0	1	0	0	0	0	2	0	0	0	0	0	0	2	0	0	0	0	0	0	2	0	0	0	1	0	1	D_0__Bacteria;D_1__Proteobacteria;D_2__Gammaproteobacteria;D_3__Xanthomonadales
0c84074837a6851e27970307dbda8113	2	2	0	2	0	0	0	0	0	0	0	0	4	1	2	0	0	0	0	2	0	1	4	0	4	0	4	12	2	1	3	1	3	5	8	5	D_0__Bacteria;D_1__Gemmatimonadetes;D_2__Gemmatimonadetes;D_3__Gemmatimonadales;D_4__Gemmatimonadaceae;D_5__uncultured
f0bdbca681df5c4ffa5a10292578723c	2	0	0	0	0	0	0	0	0	0	0	0	0	0	0	0	0	0	0	0	0	3	0	0	2	0	0	0	0	0	1	0	0	0	2	0	D_0__Bacteria;D_1__Proteobacteria;D_2__Alphaproteobacteria;D_3__Sphingomonadales;D_4__Sphingomonadaceae;D_5__Sphingomonas
2b51afde33f0389aea51315d131f1b5e	0	0	0	0	0	0	0	0	0	0	0	0	0	0	0	3	2	0	0	0	0	0	0	0	3	0	3	0	0	0	0	0	0	0	0	0	D_0__Bacteria;D_1__Proteobacteria;D_2__Deltaproteobacteria;D_3__Myxococcales;D_4__Haliangiaceae;D_5__Haliangium;D_6__bacterium Ellin6502
993c998894f2f4d51aec17dd68484ea5	0	1	0	0	0	0	0	0	1	0	0	0	0	0	0	0	0	0	0	0	0	0	0	0	0	0	0	0	0	0	0	0	0	0	0	0	D_0__Bacteria;D_1__Acidobacteria;D_2__Acidobacteriia;D_3__Acidobacteriales;D_4__Koribacteraceae;D_5__Candidatus Koribacter
bc509fc23d4bba47ca1a09d5a4366f73	3	5	4	2	3	2	2	2	2	3	3	0	6	7	7	11	5	5	0	9	2	4	9	0	8	8	2	2	8	7	10	4	5	0	3	5	D_0__Bacteria;D_1__Gemmatimonadetes;D_2__Gemmatimonadetes;D_3__Gemmatimonadales;D_4__Gemmatimonadaceae;D_5__Gemmatimonas
ea43a3fed2eff8db123824501148421f	0	0	0	0	0	0	0	2	0	0	0	0	0	0	0	0	0	0	0	0	0	0	0	0	0	0	0	0	0	0	0	0	2	1	1	0	D_0__Bacteria;D_1__Bacteroidetes;D_2__Bacteroidia;D_3__Chitinophagales;D_4__Chitinophagaceae;D_5__Flavisolibacter
a1c7bff965e9877774f05f1306173824	3	1	2	0	2	2	0	2	0	2	4	0	0	0	0	0	0	1	0	2	2	0	1	0	0	0	0	0	0	0	1	4	0	0	2	4	D_0__Bacteria;D_1__Proteobacteria;D_2__Deltaproteobacteria;D_3__RCP2-54
9fdf37768cb58be63e6d4f1398c0b65d	2	0	1	1	0	0	1	0	0	0	0	0	0	0	0	0	0	0	0	0	0	0	0	0	0	0	0	0	0	0	0	0	1	0	0	0	D_0__Bacteria;D_1__Bacteroidetes;D_2__Bacteroidia;D_3__Cytophagales;D_4__Microscillaceae;D_5__OLB12;D_6__Bacteroidetes bacterium OLB12
50328e31715d3ca466603173ce21586a	0	3	0	1	1	2	2	1	4	2	3	1	3	2	3	0	0	4	8	0	3	1	2	0	1	1	1	3	0	6	4	3	2	6	0	0	D_0__Bacteria;D_1__Actinobacteria;D_2__Thermoleophilia;D_3__Gaiellales
56e5534d83d391e577e92ab06f799a15	0	0	0	0	0	2	0	0	0	0	0	0	0	0	0	0	3	0	0	0	0	0	0	0	0	0	0	2	0	0	0	0	0	1	0	0	D_0__Bacteria;D_1__Proteobacteria;D_2__Gammaproteobacteria;D_3__Gammaproteobacteria Incertae Sedis;D_4__Unknown Family;D_5__Acidibacter
5ffc3e333b9c290dd2c674bb8bf577f1	0	0	0	0	0	0	0	0	0	0	0	0	2	0	0	0	0	0	1	3	0	0	0	1	0	0	0	2	0	2	0	0	0	0	0	0	D_0__Bacteria
31cd2fe33a6d2738f38f852f03be9a7b	0	1	0	0	0	0	0	0	0	0	0	0	0	0	1	1	1	2	0	3	1	0	0	0	2	0	2	0	0	0	0	0	0	0	0	0	D_0__Bacteria;D_1__Actinobacteria;D_2__Actinobacteria;D_3__Frankiales
f220d5ef38bb8a339ff43bc3c5646d15	0	0	0	0	0	0	0	0	0	0	0	0	1	0	2	0	3	1	1	1	0	0	3	0	3	3	0	3	0	0	0	0	0	0	0	0	D_0__Bacteria;D_1__Acidobacteria;D_2__Acidobacteriia;D_3__Solibacterales;D_4__Solibacteraceae (Subgroup 3);D_5__Candidatus Solibacter
74390390fbf3160f55cd57215faf6d9a	0	1	0	0	0	3	0	0	0	0	1	0	0	1	0	0	0	1	0	0	0	0	0	0	1	0	0	0	0	0	0	0	0	2	0	0	D_0__Bacteria;D_1__Actinobacteria;D_2__Acidimicrobiia;D_3__IMCC26256;D_4__uncultured organism;D_5__uncultured organism;D_6__uncultured organism
77222be7e3c4bb2be48cba6457146491	6	1	5	6	0	5	0	5	3	0	0	0	0	0	5	0	0	10	0	0	0	1	0	1	0	2	5	0	0	0	0	0	0	0	0	0	D_0__Bacteria;D_1__Proteobacteria;D_2__Gammaproteobacteria;D_3__Xanthomonadales;D_4__Xanthomonadaceae;D_5__Lysobacter
21c275cf91f40f17891bcea72f752db2	2	1	0	6	0	12	0	0	0	0	4	4	0	0	0	2	0	0	0	0	0	1	0	0	0	0	0	0	0	0	1	3	0	1	0	3	D_0__Bacteria;D_1__Proteobacteria;D_2__Gammaproteobacteria;D_3__Betaproteobacteriales;D_4__Burkholderiaceae
297bb88d812f92adaf1e0d97c52eae84	0	0	1	0	1	0	0	0	0	2	0	0	0	0	0	0	0	0	1	2	0	0	0	0	0	2	2	0	0	2	1	0	1	1	0	2	D_0__Bacteria;D_1__Actinobacteria;D_2__Actinobacteria;D_3__Streptomycetales;D_4__Streptomycetaceae;D_5__Streptomyces
61100edaf01bfa9ce1328787486f9521	0	0	0	0	0	0	0	0	0	0	4	3	0	0	0	0	0	0	2	0	5	0	0	0	0	0	0	2	0	0	2	0	2	2	3	0	D_0__Bacteria;D_1__Actinobacteria;D_2__Acidimicrobiia;D_3__IMCC26256
c7d2e0a62b5d04f8d4567f99653f55dd	2	0	0	0	1	1	0	2	0	3	1	1	0	0	0	0	0	1	0	0	1	0	0	1	0	0	0	0	0	0	1	0	0	0	0	0	D_0__Bacteria;D_1__Gemmatimonadetes;D_2__Gemmatimonadetes;D_3__Gemmatimonadales;D_4__Gemmatimonadaceae;D_5__uncultured;D_6__uncultured Pseudomonadales bacterium
86c09014854ada3a7c93dc0a8201835a	0	0	0	0	0	0	0	0	0	0	0	0	0	0	1	1	0	0	0	2	0	0	2	2	0	0	0	0	0	2	0	0	0	0	1	0	D_0__Bacteria;D_1__Actinobacteria;D_2__Thermoleophilia;D_3__Gaiellales;D_4__Gaiellaceae;D_5__Gaiella
ca56ca1d532b10aa495e3135242128b0	1	0	0	0	2	0	0	1	0	0	1	1	3	3	0	0	0	0	0	0	1	2	0	0	0	0	2	0	0	0	0	4	1	0	1	0	D_0__Bacteria;D_1__Acidobacteria;D_2__Subgroup 6
8b7a4d5662d11ba3a5f2be90bd6f541e	0	0	2	0	0	0	0	0	0	0	0	0	0	0	0	0	0	0	0	2	0	0	0	0	0	0	0	0	0	0	0	1	0	2	1	1	D_0__Bacteria;D_1__Bacteroidetes;D_2__Bacteroidia;D_3__Cytophagales;D_4__Microscillaceae;D_5__uncultured;D_6__Bacteroidetes bacterium N2
cbecc69aa229db81471ab6430331ef26	2	0	0	0	0	0	0	0	0	0	1	0	0	3	0	0	2	0	0	0	0	3	0	0	1	1	0	2	1	0	0	0	0	0	1	1	D_0__Bacteria;D_1__Proteobacteria;D_2__Alphaproteobacteria;D_3__Rhizobiales;D_4__Devosiaceae;D_5__Devosia
4ec2f650304a84f829aefacdd5e403ec	0	0	1	0	0	0	0	0	0	1	0	0	0	0	0	0	0	0	0	0	0	0	0	0	0	0	0	0	1	0	1	1	1	1	3	7	D_0__Bacteria;D_1__Gemmatimonadetes;D_2__Gemmatimonadetes;D_3__Gemmatimonadales;D_4__Gemmatimonadaceae;D_5__Gemmatimonas
000c31b7ac7a506c19b4f94d8c0618cc	3	2	2	0	0	1	0	3	2	0	1	1	0	0	0	0	0	0	0	0	0	3	0	0	0	0	0	0	0	0	1	1	0	0	2	1	D_0__Bacteria;D_1__Acidobacteria;D_2__Holophagae;D_3__Subgroup 7
39ce73b88dd6a627f197dbd011928797	2	0	0	1	1	0	0	0	0	2	0	0	2	0	0	0	0	0	0	0	0	0	0	0	0	0	0	0	0	0	0	0	0	0	0	0	D_0__Bacteria;D_1__Chloroflexi;D_2__Dehalococcoidia;D_3__S085
5eba64ad6c815391e0594cfd7fdc4265	0	2	2	1	2	5	1	1	3	4	0	2	3	0	0	0	0	0	1	0	0	3	0	0	0	0	0	0	0	0	0	1	2	0	0	0	D_0__Bacteria;D_1__Acidobacteria;D_2__Subgroup 6;D_3__Acidobacteria bacterium SCN 69-37;D_4__Acidobacteria bacterium SCN 69-37;D_5__Acidobacteria bacterium SCN 69-37;D_6__Acidobacteria bacterium SCN 69-37
dc4df6aa263d156949e3c724ac4f6501	0	0	0	0	0	0	0	0	0	0	0	0	0	0	0	0	0	0	0	0	0	0	0	0	0	0	3	0	0	0	0	1	0	0	1	0	D_0__Bacteria;D_1__Actinobacteria;D_2__Actinobacteria;D_3__Micromonosporales;D_4__Micromonosporaceae
f85299c78e6482b7ff3d94e44731b817	0	0	0	0	0	2	3	1	6	2	0	2	3	0	0	6	0	0	0	0	0	0	0	0	2	0	0	4	0	2	1	0	0	0	5	1	D_0__Bacteria;D_1__Proteobacteria;D_2__Gammaproteobacteria;D_3__Xanthomonadales
632365935cc658289ea9e700b2588eba	0	0	0	0	0	0	0	0	0	0	0	0	0	0	5	0	0	0	0	0	0	0	3	0	0	0	0	0	0	0	0	0	0	0	0	0	D_0__Bacteria;D_1__Acidobacteria;D_2__Blastocatellia (Subgroup 4);D_3__Blastocatellales;D_4__Blastocatellaceae
3a351c18535b15df7726e875ce969ffc	1	0	6	2	2	5	0	0	0	0	2	0	0	3	0	0	0	0	0	0	0	0	0	0	0	0	3	2	4	0	0	1	0	1	3	2	D_0__Bacteria;D_1__Bacteroidetes;D_2__Bacteroidia;D_3__Cytophagales;D_4__Microscillaceae;D_5__OLB12;D_6__uncultured prokaryote
8f0be76e51f882bb76bb408cedb996ef	4	0	0	0	0	0	0	0	0	0	0	0	3	0	0	0	0	1	2	0	1	0	0	0	0	0	2	0	0	0	0	0	0	0	0	0	D_0__Bacteria;D_1__Acidobacteria;D_2__Blastocatellia (Subgroup 4);D_3__Pyrinomonadales;D_4__Pyrinomonadaceae;D_5__RB41
d96e2a5c86c7244ed8af1e03821568c9	0	0	0	0	0	0	0	0	0	0	0	0	0	0	0	0	0	0	0	0	0	0	1	0	0	0	0	0	2	0	0	0	1	0	0	0	D_0__Bacteria;D_1__Gemmatimonadetes;D_2__Gemmatimonadetes;D_3__Gemmatimonadales;D_4__Gemmatimonadaceae;D_5__uncultured
1744b79c4b26a0c8d0126134abcc5012	0	0	0	0	0	0	0	1	0	0	0	0	0	0	0	0	0	0	0	0	0	0	0	0	0	0	0	0	0	0	0	0	0	0	0	0	D_0__Bacteria;D_1__Verrucomicrobia;D_2__Verrucomicrobiae;D_3__Pedosphaerales;D_4__Pedosphaeraceae;D_5__Verrucomicrobia bacterium LX181;D_6__Verrucomicrobia bacterium LX181
6ab3c985a180d8f7f3c698097d62b375	0	1	0	0	0	0	0	0	0	0	3	1	0	2	1	0	0	1	1	0	2	0	0	0	0	0	0	0	1	0	0	0	0	2	2	0	D_0__Bacteria;D_1__Proteobacteria;D_2__Alphaproteobacteria;D_3__Elsterales;D_4__uncultured
4083f223058cf0517297afbc218515a0	0	0	0	0	0	0	0	0	0	0	0	0	0	0	0	0	0	0	0	0	0	2	2	0	0	0	0	0	0	0	0	0	0	0	0	0	D_0__Bacteria;D_1__Chloroflexi;D_2__KD4-96;D_3__uncultured Longilinea sp.;D_4__uncultured Longilinea sp.;D_5__uncultured Longilinea sp.;D_6__uncultured Longilinea sp.
73b0f9171252b7432220d0f7ba1e5741	2	0	0	0	0	0	0	0	0	0	0	0	0	0	4	0	0	0	0	0	2	2	6	1	3	2	0	3	1	0	0	0	0	0	0	1	D_0__Bacteria;D_1__Actinobacteria;D_2__Actinobacteria;D_3__Propionibacteriales;D_4__Nocardioidaceae;D_5__Nocardioides
5562d640c783734b49173a79c70bf6f9	0	0	0	0	0	0	0	2	0	3	0	0	0	0	0	0	0	0	0	0	3	0	0	0	0	0	0	0	2	0	0	0	0	0	0	0	D_0__Bacteria;D_1__Proteobacteria;D_2__Deltaproteobacteria;D_3__Myxococcales;D_4__Haliangiaceae;D_5__Haliangium;D_6__uncultured sludge bacterium A9
b360136db5314370b4474dc56d969526	2	0	0	0	0	0	1	0	0	0	0	2	0	0	0	0	0	0	0	0	0	0	0	0	0	0	0	0	0	0	0	0	1	2	2	0	D_0__Bacteria;D_1__Chloroflexi;D_2__OLB14
641d9702fb6f5fa1a60393b14e1f9e90	2	5	5	3	1	0	0	3	0	0	1	0	0	0	0	0	0	0	0	0	2	0	0	0	0	0	3	0	0	1	1	1	2	3	9	0	D_0__Bacteria;D_1__Latescibacteria;D_2__uncultured soil bacterium;D_3__uncultured soil bacterium;D_4__uncultured soil bacterium;D_5__uncultured soil bacterium;D_6__uncultured soil bacterium
25a1f64eeeac73d8dce92035363b02fc	1	0	0	0	0	1	0	0	0	4	0	0	1	0	2	0	0	3	0	2	1	0	0	0	0	0	2	0	0	0	0	1	3	0	1	0	D_0__Bacteria;D_1__Acidobacteria;D_2__Acidobacteriia;D_3__Solibacterales;D_4__Solibacteraceae (Subgroup 3);D_5__Paludibaculum;D_6__uncultured bacterium SJA-149
550cee2a9c1230c064e2d6f431d499ab	0	0	2	0	0	0	0	0	0	0	1	0	0	0	0	0	0	0	0	0	0	1	0	0	1	0	0	0	0	0	0	0	1	0	0	1	D_0__Bacteria;D_1__Proteobacteria;D_2__Deltaproteobacteria;D_3__NB1-j;D_4__uncultured Desulfoglaeba sp.;D_5__uncultured Desulfoglaeba sp.;D_6__uncultured Desulfoglaeba sp.
f06906f04d7801878b76255c16c74c09	0	1	3	1	0	1	1	3	0	0	2	3	2	4	2	1	11	12	5	0	2	8	6	1	3	2	2	3	5	5	1	2	1	2	2	2	D_0__Bacteria;D_1__Bacteroidetes;D_2__Bacteroidia;D_3__Sphingobacteriales
d748abcda6b477a207a145217cd5cd3a	0	0	0	0	0	0	0	0	1	0	0	0	0	0	0	0	0	0	0	0	0	0	0	0	2	0	0	0	0	0	0	0	0	0	0	0	D_0__Bacteria;D_1__Actinobacteria;D_2__Acidimicrobiia
07cf972d55c0824705b626cdadf099c0	0	0	1	0	2	0	0	1	0	0	0	0	0	0	0	0	0	0	0	0	0	0	0	0	0	0	0	0	0	0	2	1	0	0	0	0	D_0__Bacteria;D_1__Proteobacteria;D_2__Deltaproteobacteria
ec29fbba11334e73ae0563b5e2bcbd9a	0	2	0	0	0	0	0	0	0	0	0	0	0	0	0	0	0	0	0	0	0	0	0	0	0	0	0	0	0	0	0	0	3	0	0	0	D_0__Bacteria;D_1__Proteobacteria;D_2__Gammaproteobacteria;D_3__Pseudomonadales;D_4__Pseudomonadaceae;D_5__Pseudomonas
1e1ef13d5819efeecb73f18c10ab3bce	3	0	0	0	0	0	4	1	0	0	0	0	0	0	0	0	0	0	0	0	0	0	0	0	0	0	2	0	2	0	1	0	2	0	0	0	D_0__Bacteria;D_1__Proteobacteria;D_2__Gammaproteobacteria;D_3__Xanthomonadales;D_4__Xanthomonadaceae;D_5__Pseudoxanthomonas
3b6ea875b5b2247d995c3c35f6e0f2b3	0	0	0	6	0	2	0	0	0	0	0	2	0	0	0	0	0	0	0	0	0	0	0	0	0	0	0	0	0	0	0	1	0	1	2	0	D_0__Bacteria;D_1__Proteobacteria;D_2__Gammaproteobacteria;D_3__Betaproteobacteriales;D_4__Burkholderiaceae;D_5__Limnobacter;D_6__Limnobacter thiooxidans
fa6fc7d76296045d9a97ac78d49764a2	0	0	0	0	0	0	0	0	0	0	0	0	0	0	0	0	0	0	0	0	0	0	0	2	0	0	1	4	0	3	0	0	0	0	0	0	D_0__Bacteria;D_1__Gemmatimonadetes;D_2__Gemmatimonadetes;D_3__Gemmatimonadales;D_4__Gemmatimonadaceae
9329df35ff2791320bbcf464384006cd	3	0	0	0	0	0	0	0	1	0	0	1	0	0	0	0	0	0	0	0	0	0	0	0	0	0	0	0	0	0	0	0	0	0	1	0	D_0__Bacteria;D_1__Proteobacteria;D_2__Deltaproteobacteria;D_3__Myxococcales;D_4__Haliangiaceae;D_5__Haliangium
b05043923c33d6ec690f190958c8a79b	3	0	0	0	3	0	0	0	0	0	0	0	0	0	0	0	0	0	0	0	0	0	0	0	0	0	0	0	0	0	0	0	0	0	1	0	D_0__Bacteria;D_1__Proteobacteria;D_2__Alphaproteobacteria;D_3__Rhizobiales;D_4__Xanthobacteraceae
620e62212699a751d3a703d56fa1508f	0	0	0	0	0	0	0	0	0	0	0	1	0	0	0	0	0	0	0	0	0	0	0	0	0	0	1	0	0	0	0	2	2	3	0	6	D_0__Bacteria;D_1__Acidobacteria;D_2__Holophagae;D_3__Subgroup 7;D_4__uncultured Thermaerobacter sp.;D_5__uncultured Thermaerobacter sp.;D_6__uncultured Thermaerobacter sp.
24c6ba57a14ef9c1a91ded8148045e3b	2	2	3	1	1	0	0	0	3	1	0	0	0	0	0	0	0	1	0	0	0	0	0	0	0	2	0	0	2	0	0	0	0	0	1	3	D_0__Bacteria;D_1__Proteobacteria;D_2__Gammaproteobacteria;D_3__Betaproteobacteriales;D_4__Burkholderiaceae
5b2d65ddbcac1432f7948c233c5275f1	2	0	0	2	0	2	47	0	0	0	0	0	0	0	0	0	0	0	0	0	0	0	0	0	0	0	1	0	14	0	0	0	0	0	0	0	D_0__Bacteria;D_1__Bacteroidetes;D_2__Bacteroidia;D_3__Sphingobacteriales;D_4__NS11-12 marine group;D_5__Bacteroidetes bacterium UKL13-3;D_6__Bacteroidetes bacterium UKL13-3
4f9d9bdfa5bab09c49bd1efebf4be2e6	0	0	0	0	0	0	0	1	0	0	0	0	2	2	0	0	0	0	1	4	2	0	0	0	0	0	0	2	0	0	0	1	0	0	0	0	D_0__Bacteria;D_1__Verrucomicrobia;D_2__Verrucomicrobiae;D_3__Pedosphaerales;D_4__Pedosphaeraceae
488f7f0e94a79691b1f5ece87be42625	0	0	0	0	0	0	0	0	2	1	0	0	0	0	0	0	0	1	0	0	0	2	0	0	0	0	0	0	0	0	0	2	1	0	0	0	D_0__Bacteria;D_1__Proteobacteria;D_2__Gammaproteobacteria
7c72f6afa012749160d6dc831b1804a5	1	0	3	2	0	3	0	0	0	0	0	0	0	0	0	0	0	0	0	0	0	0	0	0	0	0	0	0	0	0	0	0	0	0	0	1	D_0__Bacteria;D_1__Proteobacteria;D_2__Deltaproteobacteria;D_3__Myxococcales;D_4__Haliangiaceae;D_5__Haliangium
1f2e6b8ecfb05be083ab238a56bb9ebc	0	0	2	0	0	2	0	2	0	0	0	1	0	0	0	0	0	0	0	0	0	1	2	0	0	0	0	0	0	0	0	0	0	1	0	0	D_0__Bacteria;D_1__Actinobacteria;D_2__Thermoleophilia;D_3__Solirubrobacterales;D_4__67-14;D_5__bacterium YC-ZSS-LKJ159;D_6__bacterium YC-ZSS-LKJ159
981d7723b4a2796b93af2701e6dd3ac3	0	0	0	0	0	0	0	0	0	0	0	0	0	0	0	0	0	0	0	0	0	0	0	0	0	0	1	0	0	0	0	2	1	0	0	0	D_0__Bacteria;D_1__Actinobacteria;D_2__Actinobacteria;D_3__Corynebacteriales;D_4__Mycobacteriaceae;D_5__Mycobacterium
9721ab6acd1ad7232d110ef775e39c77	0	0	0	0	0	0	0	0	0	0	0	0	0	0	0	4	4	0	0	6	0	0	0	1	5	0	0	0	0	0	0	0	0	0	0	0	D_0__Bacteria;D_1__Proteobacteria;D_2__Gammaproteobacteria;D_3__KF-JG30-C25
85f6367db7c48ce063742d6e67a6c52f	0	0	0	0	0	0	0	0	0	0	0	0	0	0	1	2	0	1	0	0	0	0	0	0	2	1	2	2	0	0	0	0	0	0	0	0	D_0__Bacteria;D_1__Bacteroidetes;D_2__Bacteroidia;D_3__Chitinophagales;D_4__Chitinophagaceae;D_5__Ferruginibacter
22520da93b8bd9bc2ddb86657d6e83b5	2	0	0	0	2	0	2	0	0	0	2	2	0	0	0	2	0	0	2	0	0	1	0	1	0	0	0	0	1	0	3	0	0	3	0	0	D_0__Bacteria;D_1__Bacteroidetes;D_2__Bacteroidia;D_3__Cytophagales;D_4__Microscillaceae
8a60d04c17ff8b0b67a53b5743f5d440	0	0	0	0	0	0	0	2	0	0	0	1	0	0	0	0	0	0	0	1	0	0	0	0	0	0	0	0	0	0	0	1	0	0	2	0	D_0__Bacteria;D_1__Acidobacteria;D_2__Acidobacteriia;D_3__Acidobacteriales;D_4__Acidobacteriaceae (Subgroup 1)
7c60804f7fac351b1e1b7467cf5e8722	0	0	0	0	0	0	0	0	0	0	0	0	0	0	0	0	0	0	0	4	0	0	0	0	1	0	0	0	2	0	0	2	1	0	0	0	D_0__Bacteria;D_1__Chloroflexi;D_2__Anaerolineae;D_3__RBG-13-54-9;D_4__uncultured Caldilineaceae bacterium;D_5__uncultured Caldilineaceae bacterium;D_6__uncultured Caldilineaceae bacterium
ec5dd19dac35aa352366ddd9cf23f574	0	0	0	0	0	0	0	0	0	1	0	0	0	0	0	0	0	3	0	0	2	0	2	0	0	0	0	0	0	0	0	0	0	0	1	0	D_0__Bacteria;D_1__Chloroflexi;D_2__TK10
1c2c86b143d6df1f4ee0544ddb1074e4	0	0	0	0	0	0	0	0	0	0	1	0	0	0	0	0	0	0	0	0	0	0	0	0	0	0	0	0	0	0	0	0	1	0	0	0	D_0__Bacteria;D_1__Proteobacteria;D_2__Deltaproteobacteria;D_3__Myxococcales;D_4__Sandaracinaceae
5b98e5b14f30b52d7b9458dd01eb2bf3	0	0	4	3	0	12	1	0	0	0	0	0	0	0	0	0	0	0	0	0	0	0	0	0	0	0	0	0	0	0	1	0	0	0	0	0	D_0__Bacteria;D_1__Proteobacteria;D_2__Gammaproteobacteria;D_3__Betaproteobacteriales;D_4__Rhodocyclaceae
3146d2ee61ef617a783cdb5b7a883757	0	0	0	1	0	0	0	0	0	0	0	0	5	5	11	3	4	4	3	2	12	3	2	16	12	9	2	4	5	7	0	0	1	0	0	0	D_0__Bacteria;D_1__Proteobacteria;D_2__Gammaproteobacteria;D_3__Betaproteobacteriales;D_4__SC-I-84
2b107ac3a26d2470aee1e3e2bab10763	0	1	0	0	0	0	0	0	0	0	0	0	0	0	0	2	2	0	0	0	4	0	0	1	2	0	0	0	1	2	0	0	0	0	0	0	D_0__Bacteria;D_1__Bacteroidetes;D_2__Bacteroidia;D_3__Chitinophagales;D_4__Chitinophagaceae;D_5__Flavisolibacter;D_6__Flavisolibacter ginsengiterrae
06ebbb38246d43b932a5e4be74fef8f1	0	0	1	1	3	0	0	2	3	1	0	3	0	0	0	0	0	0	0	0	0	0	0	0	0	2	0	2	0	2	0	0	0	0	0	0	D_0__Bacteria;D_1__Acidobacteria;D_2__Acidobacteriia;D_3__Acidobacteriales;D_4__Koribacteraceae;D_5__Candidatus Koribacter;D_6__uncultured Acidobacteriaceae bacterium
59935f28d41dedd7fb1cda43aeb83064	0	0	0	0	0	0	0	0	0	0	0	0	0	2	2	8	0	0	0	0	0	0	0	2	3	0	0	1	2	1	0	0	0	0	0	0	D_0__Bacteria;D_1__Gemmatimonadetes;D_2__Gemmatimonadetes;D_3__Gemmatimonadales;D_4__Gemmatimonadaceae;D_5__uncultured;D_6__Gemmatimonadetes bacterium WWH24
af7e8f6de6cd72b47609b2d1d0896086	0	0	0	0	0	4	0	0	1	1	1	1	0	0	0	0	0	0	0	0	0	1	0	2	0	1	2	1	0	0	0	3	1	0	1	1	D_0__Bacteria;D_1__Proteobacteria;D_2__Deltaproteobacteria;D_3__Myxococcales
393b77c27e71ea45d14c7ab4af0794c8	0	0	0	0	0	0	0	0	0	0	0	0	1	0	0	0	0	0	2	1	1	0	0	0	0	0	0	0	0	0	0	0	0	0	0	0	D_0__Bacteria;D_1__Proteobacteria;D_2__Gammaproteobacteria;D_3__Betaproteobacteriales;D_4__SC-I-84
3a97c451ba14ed4602824c298d82433f	0	2	2	0	0	2	2	0	0	0	0	0	0	0	0	2	0	2	0	1	0	0	0	0	1	1	1	0	0	0	0	0	4	0	0	0	D_0__Bacteria;D_1__Actinobacteria
f58db9430b62d06c345a4cecfc5e8dc0	0	0	0	0	0	0	0	0	0	2	0	0	2	2	0	0	0	0	0	0	0	1	0	0	0	0	0	0	0	0	0	1	0	0	0	0	D_0__Bacteria;D_1__Acidobacteria;D_2__Subgroup 5;D_3__uncultured Holophaga sp.;D_4__uncultured Holophaga sp.;D_5__uncultured Holophaga sp.;D_6__uncultured Holophaga sp.
9501d5b6a63637baaaf3a40f44dd11a4	0	0	2	2	0	0	0	0	0	0	0	0	1	0	2	3	0	0	0	0	0	0	0	0	0	0	0	0	0	0	0	0	0	0	0	0	D_0__Bacteria;D_1__Acidobacteria;D_2__Acidobacteriia;D_3__Acidobacteriales;D_4__uncultured;D_5__uncultured delta proteobacterium;D_6__uncultured delta proteobacterium
288c2f57626d62c4edce04f9af22361e	2	0	0	0	2	0	0	1	2	6	0	0	0	0	2	0	0	0	0	0	1	0	0	0	6	2	0	0	0	2	0	1	2	0	1	1	D_0__Bacteria;D_1__Firmicutes;D_2__Bacilli;D_3__Bacillales;D_4__Bacillaceae;D_5__Bacillus
fe5215c6bb82d017a705065e36922c88	0	0	1	0	0	1	0	0	2	0	0	0	0	0	0	0	0	0	0	0	0	2	0	0	0	0	0	0	0	0	4	2	0	0	1	0	D_0__Bacteria;D_1__Gemmatimonadetes;D_2__Gemmatimonadetes;D_3__Gemmatimonadales;D_4__Gemmatimonadaceae;D_5__Gemmatimonas
6197c112c6ccedf2262d8da39d8a8fb9	1	0	0	0	0	2	1	0	0	0	0	0	0	0	0	0	3	0	2	0	0	0	0	0	0	2	0	0	1	0	0	0	3	0	0	0	D_0__Bacteria;D_1__Actinobacteria;D_2__Actinobacteria;D_3__Micromonosporales;D_4__Micromonosporaceae;D_5__uncultured
a3ec3b9eb2d82b5a1efa1858c468520b	0	0	2	0	0	0	0	0	0	0	0	0	0	0	0	0	0	0	0	0	0	0	0	0	0	0	1	0	0	0	0	2	1	0	0	0	D_0__Bacteria;D_1__Nitrospirae;D_2__4-29-1
66d4d75418e87c66574ab608463da5c7	0	0	0	0	0	0	0	0	0	0	0	0	0	2	1	0	0	0	1	0	0	1	0	2	2	0	0	0	0	0	0	0	0	0	1	1	D_0__Bacteria;D_1__Proteobacteria;D_2__Alphaproteobacteria;D_3__Sphingomonadales;D_4__Sphingomonadaceae;D_5__Sphingomonas
14c5b0f5f5dd1603c9fa44bb9c11f532	0	0	0	0	2	0	1	9	3	0	10	4	4	1	6	0	0	0	0	9	0	0	5	2	5	0	0	4	0	4	1	0	0	4	1	1	D_0__Bacteria;D_1__Gemmatimonadetes;D_2__Gemmatimonadetes;D_3__Gemmatimonadales;D_4__Gemmatimonadaceae;D_5__uncultured
e8baea8c0954eff89d5961d4d3244f8b	0	0	0	0	0	0	0	0	1	0	0	5	0	0	0	0	0	0	0	0	0	0	0	0	0	0	0	0	0	0	1	0	0	0	0	0	D_0__Bacteria;D_1__Proteobacteria;D_2__Deltaproteobacteria;D_3__Myxococcales;D_4__BIrii41;D_5__uncultured proteobacterium;D_6__uncultured proteobacterium
a834fde1970b7fa8f751cdd658f4d869	0	0	0	0	0	0	0	0	0	0	0	0	0	0	0	0	0	0	0	0	3	0	0	0	2	0	0	0	0	0	0	0	0	0	0	3	D_0__Bacteria;D_1__Proteobacteria;D_2__Gammaproteobacteria;D_3__Pseudomonadales;D_4__Pseudomonadaceae;D_5__Pseudomonas
6ef27b0df006050a67e77e7be58ac45c	0	0	3	2	0	0	0	0	0	0	0	0	0	0	0	0	0	0	0	0	0	0	0	0	0	0	0	0	0	0	0	0	0	0	0	0	D_0__Bacteria;D_1__Bacteroidetes;D_2__Bacteroidia;D_3__Flavobacteriales;D_4__NS9 marine group
c633b0203d91fb2f97f9bfd50bd9919f	3	0	0	1	0	0	0	0	2	0	0	0	0	0	1	1	5	0	2	0	0	0	0	0	0	0	0	0	2	0	1	0	0	0	0	0	D_0__Bacteria;D_1__Acidobacteria;D_2__Acidobacteriia;D_3__Acidobacteriales;D_4__uncultured;D_5__uncultured delta proteobacterium;D_6__uncultured delta proteobacterium
c2986212d50be4cb17dc94876ce0b005	0	0	1	0	0	0	0	2	0	1	0	0	4	14	7	12	4	3	0	5	2	2	0	0	8	3	1	4	4	4	0	0	0	0	0	0	D_0__Bacteria;D_1__Proteobacteria;D_2__Gammaproteobacteria;D_3__Xanthomonadales;D_4__Rhodanobacteraceae;D_5__Rhodanobacter
9afa8866e4527d0bdf2483de9b90842f	0	0	0	0	0	0	0	0	0	0	0	0	0	0	0	0	2	0	0	0	0	0	0	0	0	1	2	0	4	0	0	0	0	0	0	0	D_0__Bacteria;D_1__Proteobacteria;D_2__Alphaproteobacteria;D_3__Rhizobiales;D_4__Xanthobacteraceae
ea0ee6d40a3cc38366a464c3766ede88	8	0	0	0	0	0	0	0	0	0	0	0	0	0	0	0	0	4	0	0	0	0	0	0	0	0	0	0	0	0	0	0	0	0	0	0	D_0__Bacteria;D_1__Proteobacteria;D_2__Deltaproteobacteria;D_3__Myxococcales;D_4__BIrii41
08b9a236930e2d73b745afaa03b89917	0	0	0	0	0	0	0	0	0	0	0	0	1	0	1	0	0	0	0	0	0	2	0	0	0	0	0	0	0	0	0	0	0	0	0	0	D_0__Bacteria;D_1__Chloroflexi;D_2__Ktedonobacteria;D_3__Ktedonobacterales;D_4__JG30-KF-AS9;D_5__uncultured bacterium;D_6__uncultured bacterium
271af0035cd32bd4499f695a161dc674	0	0	0	0	0	0	0	0	0	0	2	0	0	0	0	0	0	0	0	0	0	2	0	0	1	0	0	0	2	1	0	0	0	0	0	0	D_0__Bacteria;D_1__Chloroflexi;D_2__KD4-96;D_3__uncultured Longilinea sp.;D_4__uncultured Longilinea sp.;D_5__uncultured Longilinea sp.;D_6__uncultured Longilinea sp.
769009bf00e5b5c5cff606f4e59e903b	3	0	0	0	0	0	0	0	1	0	4	4	6	7	6	5	2	7	0	2	1	12	5	0	14	8	12	0	6	0	7	5	0	4	13	1	D_0__Bacteria;D_1__Proteobacteria;D_2__Gammaproteobacteria;D_3__Xanthomonadales;D_4__Xanthomonadaceae
60b44470f3bc613f831cdb6dbeba5086	0	0	2	0	0	1	0	2	0	2	0	0	0	2	5	0	0	2	0	0	0	3	0	3	0	3	0	0	2	0	2	0	0	4	0	0	D_0__Bacteria;D_1__Proteobacteria;D_2__Gammaproteobacteria;D_3__Xanthomonadales;D_4__Xanthomonadaceae;D_5__Lysobacter
36f14ec44494186001e2f4133cbee9d8	0	0	0	0	0	0	0	0	0	0	0	0	0	0	0	0	0	0	0	0	0	0	2	0	0	0	0	0	0	0	2	4	0	1	2	0	D_0__Bacteria;D_1__Bacteroidetes;D_2__Bacteroidia;D_3__Chitinophagales;D_4__Chitinophagaceae;D_5__Niastella;D_6__Niastella koreensis GR20-10
2db487f9318ad3c139ac80a3e10242fc	0	0	0	0	0	0	0	0	0	0	1	0	0	0	0	0	0	0	0	0	0	0	0	0	0	0	0	0	0	0	0	0	0	3	2	0	D_0__Bacteria;D_1__Acidobacteria;D_2__Acidobacteriia;D_3__Solibacterales;D_4__Solibacteraceae (Subgroup 3);D_5__Bryobacter;D_6__uncultured Holophaga sp.
0d76d560c0f9cc6ff377da4b0486bc8a	2	0	3	1	0	3	2	2	2	0	7	3	0	1	0	0	0	0	6	0	2	0	0	0	0	0	0	0	0	0	7	5	6	9	5	2	D_0__Bacteria;D_1__Latescibacteria
16ef31be44aeb6f8bf039bfdfcb32c1a	0	0	0	0	3	0	0	0	0	0	0	2	0	0	0	0	0	0	0	0	0	0	0	0	0	0	0	2	0	0	0	0	0	0	0	0	D_0__Bacteria;D_1__Actinobacteria;D_2__Actinobacteria;D_3__Frankiales;D_4__uncultured
c166a038db246634584f23d0ffbb7ec2	0	0	0	0	0	0	0	0	0	0	0	0	0	1	0	0	0	0	1	0	0	0	0	0	0	0	0	0	0	0	0	0	0	0	0	0	D_0__Bacteria;D_1__Entotheonellaeota;D_2__Entotheonellia;D_3__Entotheonellales;D_4__Entotheonellaceae;D_5__uncultured soil bacterium;D_6__uncultured soil bacterium
05cd93d42d0cf3930e0cb2d8bc1df339	0	1	0	0	0	3	0	0	0	0	0	0	0	0	0	0	1	0	0	0	0	0	0	0	0	0	0	0	0	0	0	0	1	0	0	0	D_0__Bacteria;D_1__Firmicutes;D_2__Bacilli;D_3__Bacillales
5fd5285fe357b7d53820b8d442717904	0	0	2	0	1	0	0	0	0	0	0	0	1	0	0	0	0	0	0	0	0	0	0	0	0	0	0	0	0	0	1	0	0	0	1	0	D_0__Bacteria;D_1__Proteobacteria;D_2__Gammaproteobacteria;D_3__Betaproteobacteriales;D_4__Nitrosomonadaceae;D_5__Ellin6067
52b9646c68e437d00d8968e30232270b	0	0	0	0	0	0	0	0	0	2	3	1	0	0	0	0	0	0	0	0	0	0	0	0	0	0	0	0	0	0	0	0	0	0	0	0	D_0__Bacteria;D_1__Proteobacteria;D_2__Gammaproteobacteria;D_3__Betaproteobacteriales
a5c4665953dadabdfe3dd3ec2e8209df	0	0	0	0	0	0	0	0	0	0	0	0	0	0	0	0	5	0	0	0	0	0	4	0	1	0	0	0	0	0	0	0	0	0	0	0	D_0__Bacteria;D_1__Firmicutes;D_2__Bacilli;D_3__Bacillales
2a1f513da8c5ad1705fcb88e16bf3a4b	0	0	0	0	0	0	0	1	0	0	0	0	0	0	0	0	0	0	0	0	0	0	0	0	0	0	0	0	1	0	0	2	0	0	2	0	D_0__Bacteria;D_1__Gemmatimonadetes;D_2__BD2-11 terrestrial group;D_3__uncultured Gemmatimonadales bacterium;D_4__uncultured Gemmatimonadales bacterium;D_5__uncultured Gemmatimonadales bacterium;D_6__uncultured Gemmatimonadales bacterium
ebbd8b193c589910e4eeed3356c5be74	0	1	0	0	1	2	0	0	4	3	2	2	3	2	0	5	0	0	1	0	0	0	0	1	0	0	0	0	0	2	3	3	4	1	0	0	D_0__Bacteria;D_1__Acidobacteria;D_2__Subgroup 6
a1d50dbaa286f76fcfa16f14b6bb988a	0	0	0	0	0	0	0	0	0	0	1	0	0	0	1	0	0	0	0	0	0	0	0	0	0	0	0	2	0	0	0	0	0	0	0	0	D_0__Bacteria;D_1__Patescibacteria;D_2__Saccharimonadia;D_3__Saccharimonadales
741f00d682e75878c7e92cd8a78546a2	0	0	0	0	1	0	0	0	0	0	0	0	0	0	0	0	0	0	0	0	0	0	0	0	0	0	0	0	0	1	0	0	0	0	0	0	D_0__Bacteria;D_1__Proteobacteria;D_2__Gammaproteobacteria
e55f39bea2e15945e73a184cdcf491da	0	0	0	0	0	0	2	0	0	0	0	0	0	0	0	0	0	0	0	0	0	0	0	0	0	0	0	0	1	0	0	0	0	0	0	0	D_0__Bacteria;D_1__Actinobacteria;D_2__Thermoleophilia;D_3__Gaiellales;D_4__uncultured;D_5__uncultured bacterium 5G12;D_6__uncultured bacterium 5G12
7b4482ff6ed9ad6f2f07b2549d30af4d	2	7	4	2	0	0	0	2	2	2	2	2	8	6	2	0	2	2	3	3	3	1	6	0	3	0	2	2	0	2	3	3	3	9	6	2	D_0__Bacteria;D_1__Chloroflexi;D_2__Dehalococcoidia;D_3__S085;D_4__uncultured bacterium 5G4;D_5__uncultured bacterium 5G4;D_6__uncultured bacterium 5G4
a98923369f4111bf8d81dfeb42ff9e54	2	0	0	0	0	0	1	0	0	0	2	0	0	0	0	0	0	0	0	0	0	0	0	0	0	0	0	0	1	0	3	0	0	0	1	0	D_0__Bacteria;D_1__Actinobacteria;D_2__Actinobacteria;D_3__Streptomycetales;D_4__Streptomycetaceae;D_5__Kitasatospora
7e12fe7b881a8426b09c0136e24ce0ab	3	4	0	2	1	1	2	2	0	0	7	1	12	11	12	1	3	0	9	0	2	12	7	0	12	10	25	3	2	8	11	10	4	13	8	8	D_0__Bacteria;D_1__Bacteroidetes;D_2__Bacteroidia;D_3__Chitinophagales;D_4__Saprospiraceae;D_5__uncultured;D_6__uncultured Haliscomenobacter sp.
d6d6f04a623ead21ba1a6eb23aa8c384	0	0	2	0	0	0	0	0	0	0	1	0	0	0	0	0	0	0	0	0	0	2	0	0	0	0	1	0	2	0	1	2	0	3	0	4	D_0__Bacteria
17ebe295f365948cfa748a26e5f7cb30	0	0	0	0	0	0	0	0	0	0	0	0	0	0	0	0	0	0	0	0	0	0	0	0	0	0	0	0	0	0	1	0	0	2	1	2	D_0__Bacteria;D_1__Elusimicrobia;D_2__Elusimicrobia;D_3__Lineage IV;D_4__uncultured soil bacterium;D_5__uncultured soil bacterium;D_6__uncultured soil bacterium
9490e66e5ca8a6c775ea9157be6b09ec	0	0	3	0	0	0	0	0	0	0	0	0	0	0	0	0	0	1	0	0	0	2	0	0	0	0	0	0	0	0	0	1	2	1	0	0	D_0__Bacteria;D_1__Proteobacteria;D_2__Alphaproteobacteria;D_3__Rhodospirillales;D_4__Rhodospirillaceae;D_5__uncultured;D_6__uncultured soil bacterium
91d86b383ae3a1d3bf3b5b993ad3a670	0	1	1	0	0	0	0	0	0	0	0	0	0	1	5	0	0	1	0	0	0	0	0	7	0	1	0	0	0	0	0	0	0	0	0	0	D_0__Bacteria;D_1__Bacteroidetes;D_2__Bacteroidia;D_3__Chitinophagales;D_4__Chitinophagaceae;D_5__Flavisolibacter;D_6__Flavisolibacter swuensis
a27d9d2b1bbdaf7a7d0ab40b57a3a222	5	2	14	2	0	11	11	9	10	0	5	16	0	3	2	1	3	13	4	2	6	3	2	5	6	12	11	0	12	9	10	8	5	6	15	3	D_0__Bacteria;D_1__Bacteroidetes;D_2__Bacteroidia;D_3__Sphingobacteriales;D_4__AKYH767;D_5__uncultured soil bacterium;D_6__uncultured soil bacterium
36d94034c7edf957bdb8ceecdc87373e	0	0	0	0	0	0	0	0	0	0	0	0	0	0	2	0	0	0	0	0	0	0	0	4	0	0	0	0	0	0	0	0	0	0	0	0	D_0__Bacteria;D_1__Bacteroidetes;D_2__Bacteroidia;D_3__Flavobacteriales;D_4__Flavobacteriaceae;D_5__Flavobacterium
e2befb321a2c6892d0bd1d1a1375afd4	0	6	0	0	0	0	0	1	0	0	0	0	0	0	0	0	1	0	0	0	0	0	0	0	0	0	2	0	1	0	0	0	0	1	0	2	D_0__Bacteria;D_1__Proteobacteria;D_2__Gammaproteobacteria;D_3__CCD24;D_4__uncultured soil bacterium;D_5__uncultured soil bacterium;D_6__uncultured soil bacterium
b6464645d355f3b7b17ec0878d00a4dd	2	0	4	0	0	0	0	0	0	0	0	1	0	0	0	0	0	0	0	0	0	0	0	0	0	0	0	0	0	0	2	3	2	0	0	0	D_0__Bacteria;D_1__Acidobacteria;D_2__Acidobacteriia;D_3__Solibacterales;D_4__Solibacteraceae (Subgroup 3);D_5__Candidatus Solibacter;D_6__bacterium Ellin6505
044271f3477eb5a042aee83db656bee2	11	34	6	6	21	13	15	5	1	10	6	12	4	2	2	5	4	2	0	6	4	5	4	0	9	0	1	1	5	0	4	3	4	4	4	2	D_0__Bacteria;D_1__Gemmatimonadetes;D_2__Gemmatimonadetes;D_3__Gemmatimonadales;D_4__Gemmatimonadaceae
2826137a532ba5086e33feaf69d82568	3	0	0	1	0	2	4	0	3	2	8	2	0	2	0	2	2	0	0	0	0	0	0	0	1	1	0	0	0	1	0	0	1	2	1	0	D_0__Bacteria;D_1__Actinobacteria;D_2__Thermoleophilia;D_3__Gaiellales;D_4__Gaiellaceae;D_5__Gaiella
43e021ff5cc03dfcc27bbaa190d0264e	0	1	2	0	1	2	3	2	0	0	0	0	0	0	0	0	0	0	0	0	0	0	0	0	0	0	0	0	0	0	0	0	0	0	2	0	D_0__Bacteria;D_1__Proteobacteria;D_2__Gammaproteobacteria;D_3__Betaproteobacteriales;D_4__Nitrosomonadaceae;D_5__mle1-7;D_6__uncultured Burkholderiales bacterium
94a3799b97d9b93e680c41325587e1e6	1	0	0	0	1	0	0	0	0	1	0	3	0	0	0	0	1	2	0	0	0	0	0	0	1	5	2	0	1	0	0	0	0	0	0	1	D_0__Bacteria;D_1__Proteobacteria;D_2__Alphaproteobacteria;D_3__Rhizobiales;D_4__KF-JG30-B3;D_5__uncultured organism;D_6__uncultured organism
1b068c9e7be739546bbaa5e8101588dd	0	0	0	0	0	0	0	2	1	0	0	0	0	0	0	0	0	0	0	0	0	0	0	0	0	0	0	0	0	0	0	0	0	0	1	0	D_0__Bacteria;D_1__Proteobacteria;D_2__Alphaproteobacteria;D_3__Dongiales;D_4__Dongiaceae;D_5__Dongia;D_6__Dongia sp. URHE0060
bda0b4dcdc5f795ef203d71d85c1a422	0	0	0	0	0	0	0	0	1	0	0	1	3	0	0	0	0	0	0	0	1	1	0	0	0	0	0	0	0	0	0	0	0	0	1	0	D_0__Bacteria;D_1__Chloroflexi;D_2__Dehalococcoidia;D_3__S085;D_4__uncultured soil bacterium;D_5__uncultured soil bacterium;D_6__uncultured soil bacterium
7325bafece3f2e47f7a0337b2b467348	4	4	0	0	2	0	0	1	0	5	3	0	5	7	6	3	6	1	8	3	4	6	5	8	7	4	7	7	6	5	0	0	5	3	0	0	D_0__Bacteria;D_1__Proteobacteria;D_2__Gammaproteobacteria;D_3__Xanthomonadales;D_4__Xanthomonadaceae
c60cd14df76ffdaa7f48b742910cc80d	1	0	1	0	0	6	0	7	2	2	5	2	3	8	5	4	5	7	8	4	9	3	10	3	6	5	6	3	9	11	2	3	1	3	1	4	D_0__Bacteria;D_1__Proteobacteria;D_2__Alphaproteobacteria;D_3__Rhizobiales;D_4__Rhizobiaceae;D_5__Mesorhizobium
49a6c3ff5bb2c0a43487a5a23a3b1393	0	0	0	0	0	0	0	0	0	0	0	0	0	0	0	0	0	0	0	0	0	5	0	0	0	0	0	0	0	0	0	0	0	0	0	0	D_0__Bacteria;D_1__Firmicutes;D_2__Clostridia;D_3__Clostridiales;D_4__Ruminococcaceae;D_5__Ruminococcaceae UCG-005;D_6__uncultured bacterium adhufec108
819d574b03485f5c31edbf0ffe7c637b	0	0	0	1	0	0	0	0	0	1	0	0	0	0	1	0	0	0	0	0	0	0	0	0	0	0	0	0	0	0	1	0	0	0	0	0	D_0__Bacteria;D_1__Proteobacteria;D_2__Gammaproteobacteria;D_3__Betaproteobacteriales;D_4__SC-I-84
002e33ef5e58ec8b44555bf2273af4fc	2	0	0	0	2	0	0	0	1	0	1	1	0	0	0	0	0	0	0	3	0	0	3	0	0	0	5	0	1	0	0	1	1	2	0	0	D_0__Bacteria;D_1__Gemmatimonadetes;D_2__Gemmatimonadetes;D_3__Gemmatimonadales;D_4__Gemmatimonadaceae
f0ff66ca42c73b5ba3b87a14eb659bed	0	0	2	3	0	3	0	0	0	0	0	1	2	0	0	0	2	1	1	0	2	0	0	0	0	3	1	0	2	0	0	2	1	0	0	2	D_0__Bacteria;D_1__Proteobacteria;D_2__Gammaproteobacteria;D_3__Betaproteobacteriales;D_4__Burkholderiaceae
49d779de660575254790b51e1bd874a8	2	0	0	0	0	0	0	0	0	0	0	0	0	0	0	0	0	0	0	0	0	0	0	0	0	0	0	0	0	0	0	0	0	0	0	0	D_0__Bacteria;D_1__Proteobacteria;D_2__Alphaproteobacteria;D_3__Caulobacterales;D_4__Caulobacteraceae;D_5__Phenylobacterium
4cf882900e703efdb8df3c8a559f5414	5	9	4	3	2	2	3	1	0	2	5	1	2	0	0	0	0	0	4	0	2	3	0	0	0	1	3	0	3	0	2	3	4	0	3	0	D_0__Bacteria;D_1__Gemmatimonadetes;D_2__Gemmatimonadetes;D_3__Gemmatimonadales;D_4__Gemmatimonadaceae
6c63889cbcc4cef7e6fd91bccb7b6289	1	0	1	0	1	0	2	2	1	0	1	3	0	0	0	0	0	0	0	0	0	2	0	0	0	0	0	0	0	2	3	1	0	1	3	0	D_0__Bacteria;D_1__Proteobacteria;D_2__Gammaproteobacteria;D_3__Betaproteobacteriales;D_4__Burkholderiaceae
3ad8ae255abd131def22cadb2655a90e	0	0	0	2	0	0	0	0	0	0	0	1	0	0	2	1	0	4	0	0	0	0	0	0	2	0	0	2	0	0	4	0	1	0	0	1	D_0__Bacteria;D_1__Actinobacteria;D_2__Actinobacteria;D_3__Micrococcales;D_4__Microbacteriaceae
f9cb35d3750180584a21f661af1adf71	0	2	0	1	0	0	0	0	0	3	0	0	0	3	2	0	0	0	0	0	0	0	0	0	3	4	2	0	4	2	2	0	1	2	1	5	D_0__Bacteria;D_1__Actinobacteria;D_2__Actinobacteria;D_3__Micrococcales;D_4__Intrasporangiaceae
1a1cbf1977b8b73e61e43ab3e3387b4e	10	7	11	3	9	12	11	2	4	7	5	6	11	16	7	14	22	18	19	15	18	8	8	26	7	23	10	17	14	21	5	6	21	5	13	10	D_0__Bacteria;D_1__Proteobacteria;D_2__Alphaproteobacteria;D_3__Rhizobiales;D_4__Xanthobacteraceae;D_5__Bradyrhizobium
2d406c0cc7a5cac74e390d35faecfee5	0	2	1	0	0	0	0	0	0	0	1	0	0	1	0	0	0	0	2	0	0	0	0	0	0	0	0	0	0	0	1	0	0	0	2	1	D_0__Bacteria;D_1__Proteobacteria;D_2__Deltaproteobacteria;D_3__Myxococcales;D_4__bacteriap25;D_5__uncultured Desulfovibrionales bacterium;D_6__uncultured Desulfovibrionales bacterium
7df32f69281797b462beed540ea9bee3	0	0	0	0	0	0	0	0	0	1	0	0	0	0	3	0	0	0	0	0	0	0	0	0	0	2	0	1	0	0	2	0	0	0	0	0	D_0__Bacteria;D_1__Proteobacteria;D_2__Alphaproteobacteria;D_3__Acetobacterales;D_4__Acetobacteraceae
e29b8f42bde88668849d5672e6d05425	0	0	0	0	0	0	0	0	0	0	0	0	1	0	0	0	0	1	0	1	0	1	0	0	0	0	0	0	0	0	0	0	0	1	0	1	D_0__Bacteria;D_1__Actinobacteria;D_2__Actinobacteria;D_3__Corynebacteriales;D_4__Nocardiaceae;D_5__Nocardia
861f425d2c9eae5e1ea435fd8a63c1b1	0	0	0	0	0	0	0	0	0	0	0	0	0	0	0	1	0	0	0	0	0	0	0	0	0	0	0	0	3	1	0	0	0	0	0	0	D_0__Bacteria;D_1__Proteobacteria;D_2__Alphaproteobacteria;D_3__Rhizobiales;D_4__uncultured;D_5__uncultured Hyphomicrobiaceae bacterium;D_6__uncultured Hyphomicrobiaceae bacterium
da4cce140ef27972a7e0c6ce652c5087	0	0	0	1	0	0	0	0	0	0	0	0	0	1	2	0	0	0	0	0	0	0	0	0	2	2	2	1	1	3	8	0	0	0	2	0	D_0__Bacteria;D_1__Gemmatimonadetes;D_2__Gemmatimonadetes;D_3__Gemmatimonadales;D_4__Gemmatimonadaceae;D_5__Gemmatimonas
4d7a1fc57a0b8c8daa97573ce6b43f67	0	0	0	1	0	0	0	2	0	0	2	0	0	0	0	0	0	1	0	0	0	0	0	0	0	0	0	0	0	0	0	1	0	0	0	0	D_0__Bacteria;D_1__Bacteroidetes;D_2__Bacteroidia;D_3__Cytophagales;D_4__Microscillaceae
9b6394875076987d869710448f0711cf	0	0	0	0	0	0	0	0	0	0	0	0	0	0	0	0	0	0	2	0	0	3	0	0	0	0	0	0	0	0	2	0	0	2	0	0	D_0__Bacteria;D_1__Bacteroidetes;D_2__Bacteroidia;D_3__Chitinophagales;D_4__Saprospiraceae;D_5__Phaeodactylibacter;D_6__uncultured Haliscomenobacter sp.
841e77f7c761430bc2dbccc039ee1c6b	0	0	1	2	1	3	3	0	0	2	2	6	7	5	0	0	16	6	3	4	14	3	3	1	6	4	4	4	3	6	0	2	5	0	0	0	D_0__Bacteria;D_1__Gemmatimonadetes;D_2__Gemmatimonadetes;D_3__Gemmatimonadales;D_4__Gemmatimonadaceae;D_5__Gemmatimonas
92c40775ddc50694eabd15c5d9200051	0	0	0	0	1	0	0	0	0	0	0	0	0	0	0	0	0	0	0	0	0	0	0	0	0	0	0	0	0	0	0	0	0	0	0	0	D_0__Bacteria;D_1__Proteobacteria;D_2__Alphaproteobacteria;D_3__Micropepsales;D_4__Micropepsaceae;D_5__uncultured;D_6__uncultured Hyphomicrobiaceae bacterium
e84f7b38e5b6b6490212d5649e576cbd	4	2	0	6	3	0	5	0	0	0	0	0	0	0	3	1	0	0	0	0	0	0	0	0	0	1	0	0	3	0	0	0	0	0	0	2	D_0__Bacteria
2a776d7c93c0e5340dad43a0b51cb492	0	0	0	0	0	0	0	0	0	0	0	0	0	0	0	0	0	0	1	0	0	1	0	0	0	0	3	0	0	0	0	0	0	0	0	0	D_0__Bacteria;D_1__Planctomycetes;D_2__Phycisphaerae;D_3__Phycisphaerales;D_4__Phycisphaeraceae;D_5__SM1A02
02051a66a23177cb7ec9f765b70a3fb3	0	0	0	0	0	0	0	2	0	0	0	0	0	4	6	15	0	0	0	0	0	0	0	0	7	0	0	2	0	3	0	0	0	0	0	0	D_0__Bacteria;D_1__Acidobacteria;D_2__Acidobacteriia;D_3__Solibacterales;D_4__Solibacteraceae (Subgroup 3);D_5__Bryobacter
7c72d26307acad7bb5cab707ae4fcb14	0	1	1	0	0	2	0	2	0	2	2	0	0	1	3	3	0	2	0	0	0	5	3	0	3	1	0	0	0	3	0	0	0	0	0	0	D_0__Bacteria;D_1__Bacteroidetes;D_2__Bacteroidia;D_3__Sphingobacteriales;D_4__env.OPS 17
6d681a84c0ac9cb0a6f996398e2b5d3f	0	2	0	0	0	0	0	0	0	0	1	0	2	2	0	1	0	2	0	2	0	0	2	2	0	0	0	0	0	0	3	1	1	0	0	0	D_0__Bacteria;D_1__Proteobacteria;D_2__Alphaproteobacteria;D_3__Reyranellales;D_4__Reyranellaceae;D_5__Reyranella
53f1a9197fc2d5ea18e68834ae021596	0	0	0	0	0	0	0	0	0	0	0	0	0	0	0	0	0	0	0	0	0	0	0	0	29	0	0	3	0	0	0	0	0	0	0	0	D_0__Bacteria;D_1__Bacteroidetes;D_2__Bacteroidia;D_3__Flavobacteriales;D_4__Flavobacteriaceae;D_5__Flavobacterium
70ce9bb6aa85e434843ba2703178105f	0	0	0	0	0	0	0	0	3	1	0	0	0	1	0	0	0	0	0	0	0	0	0	0	0	0	0	0	0	3	0	0	0	0	0	0	D_0__Bacteria;D_1__Acidobacteria;D_2__Acidobacteriia;D_3__Solibacterales;D_4__Solibacteraceae (Subgroup 3);D_5__Candidatus Solibacter;D_6__bacterium Ellin7504
9d77926a9332c3d9f5c35b2f2b6dfd3f	2	0	0	0	0	0	0	0	0	0	7	0	0	0	1	0	0	0	0	0	0	1	0	0	0	0	0	0	0	0	0	0	0	0	0	0	D_0__Bacteria;D_1__Bacteroidetes;D_2__Bacteroidia;D_3__Flavobacteriales;D_4__Flavobacteriaceae;D_5__Flavobacterium
1e6fb7ed164ffd6267d87ca99ef27c9c	2	0	1	0	0	2	0	0	0	0	0	0	0	0	0	0	0	0	0	0	0	0	2	0	0	0	0	3	0	0	1	0	0	0	0	0	D_0__Bacteria;D_1__Actinobacteria;D_2__Actinobacteria;D_3__Micrococcales;D_4__Intrasporangiaceae;D_5__Phycicoccus
992304c73b6676d905f4f419c79f86b1	0	0	0	0	2	3	0	0	0	0	0	0	0	0	1	0	0	0	0	0	0	0	0	0	0	0	0	0	0	0	0	0	0	0	0	0	D_0__Bacteria;D_1__Acidobacteria;D_2__Acidobacteriia;D_3__Solibacterales;D_4__Solibacteraceae (Subgroup 3)
d7b7d07c48dc3bc18befcc4af81e6ab5	0	0	0	1	0	0	0	0	0	0	0	0	0	0	0	0	0	1	0	0	0	0	0	0	0	0	0	0	0	0	0	0	0	0	0	0	D_0__Bacteria;D_1__Bacteroidetes;D_2__Bacteroidia;D_3__Cytophagales;D_4__Microscillaceae;D_5__uncultured
e32f41f2d580507bed88737b09137577	3	0	0	1	0	0	0	0	0	2	0	1	0	0	0	0	0	0	0	0	0	0	0	0	0	0	0	0	0	0	0	0	0	0	1	3	D_0__Bacteria;D_1__Latescibacteria
2de885c40d5bbec14632ab16c5d89f34	1	0	2	0	3	0	0	0	0	3	2	0	0	15	14	2	4	3	1	8	5	3	18	18	9	1	1	5	2	4	16	1	2	25	9	9	D_0__Bacteria;D_1__Proteobacteria;D_2__Alphaproteobacteria;D_3__Caulobacterales;D_4__Caulobacteraceae;D_5__Brevundimonas
95e279b219e674f632af755c5da684cd	1	0	3	0	1	0	0	0	2	0	1	0	0	1	3	0	1	1	0	0	3	2	0	0	0	2	0	0	1	1	4	0	0	0	2	0	D_0__Bacteria;D_1__Actinobacteria;D_2__Acidimicrobiia
bfa450c44a6262a75847244d0b123816	3	0	1	0	0	0	1	1	0	0	0	0	0	0	2	2	0	0	0	0	1	0	0	0	3	0	1	0	1	1	1	0	2	0	1	0	D_0__Bacteria;D_1__Proteobacteria;D_2__Alphaproteobacteria;D_3__Sphingomonadales;D_4__Sphingomonadaceae;D_5__Sphingopyxis
5cc5f0fb459246b4ae409e0b8858524d	1	4	0	0	0	1	0	3	3	3	1	2	2	2	3	0	2	0	6	0	0	4	2	0	1	0	5	4	0	0	0	2	0	3	1	2	D_0__Bacteria;D_1__Bacteroidetes;D_2__Bacteroidia;D_3__Chitinophagales;D_4__Chitinophagaceae
5a2815ca95c895deb5d5ea6055ef0f5d	0	0	1	0	0	0	0	0	0	0	2	0	0	0	0	0	0	0	0	0	0	0	0	0	0	0	0	0	0	0	0	0	0	0	0	0	D_0__Bacteria;D_1__Proteobacteria;D_2__Deltaproteobacteria;D_3__Myxococcales;D_4__BIrii41;D_5__Sorangiineae bacterium NIC37A_2;D_6__Sorangiineae bacterium NIC37A_2
c72027074f829f0db16f21bd14e24a2e	0	0	0	0	0	0	2	1	0	12	1	1	18	30	17	34	23	7	22	16	18	14	12	23	23	11	3	9	14	17	2	1	0	2	0	0	D_0__Bacteria;D_1__Proteobacteria;D_2__Gammaproteobacteria;D_3__Betaproteobacteriales;D_4__Nitrosomonadaceae;D_5__Ellin6067
1947471cc647db3f63b2d4d8e2ad427d	0	0	0	0	0	0	0	0	0	0	0	0	0	1	0	0	0	0	0	1	0	0	3	0	0	0	0	0	0	1	1	0	0	0	0	0	D_0__Bacteria;D_1__Bacteroidetes;D_2__Bacteroidia;D_3__Cytophagales;D_4__Spirosomaceae;D_5__Dyadobacter
6d05df2fa7819a6428442049a4f81050	0	0	0	0	0	0	0	0	1	0	0	0	0	0	0	0	0	0	0	0	0	0	0	0	1	0	1	0	0	0	0	0	0	0	1	0	D_0__Bacteria;D_1__Verrucomicrobia;D_2__Verrucomicrobiae;D_3__Pedosphaerales;D_4__Pedosphaeraceae
64d511e65dfab0607b82b192b4eaa670	2	1	0	0	0	0	0	0	1	0	0	0	0	0	0	0	0	0	3	0	0	3	0	0	0	0	1	0	0	0	2	1	0	0	0	0	D_0__Bacteria;D_1__Nitrospirae;D_2__4-29-1;D_3__uncultured Nitrospira sp.;D_4__uncultured Nitrospira sp.;D_5__uncultured Nitrospira sp.;D_6__uncultured Nitrospira sp.
c1776053c8437bfa28bb354603db3c34	0	0	2	0	0	1	2	0	0	0	0	0	0	0	2	0	5	0	0	0	0	1	0	6	0	0	0	0	4	0	0	0	0	0	0	0	D_0__Bacteria;D_1__Patescibacteria;D_2__Saccharimonadia;D_3__Saccharimonadales
6498974eb8840a2de5495c0929dcea42	1	3	1	1	0	5	0	1	0	0	0	0	0	0	2	1	0	0	0	3	0	0	0	0	0	1	0	0	2	0	1	3	0	0	1	3	D_0__Bacteria;D_1__Proteobacteria;D_2__Gammaproteobacteria;D_3__Xanthomonadales;D_4__Rhodanobacteraceae;D_5__Rhodanobacter
aa8e14257b9a77c26b38c04acaff35e3	0	2	0	0	0	0	0	0	0	0	0	0	0	0	0	0	0	0	0	0	0	0	0	1	2	0	0	0	0	0	0	0	0	0	0	0	D_0__Bacteria;D_1__Armatimonadetes;D_2__Chthonomonadetes;D_3__Chthonomonadales
8bba96ddc874af46f92dbe4b5cc07bfd	40	18	43	39	35	17	125	50	21	67	45	37	21	56	81	31	40	49	47	13	64	21	63	28	72	39	52	51	61	88	36	35	34	35	28	30	D_0__Bacteria;D_1__Bacteroidetes;D_2__Bacteroidia;D_3__Flavobacteriales;D_4__Flavobacteriaceae;D_5__Flavobacterium
6071227e35ff9bfad8f4e5d5019e9c26	0	0	1	0	0	0	0	0	0	0	0	0	0	0	0	0	0	0	0	0	13	0	0	0	0	0	0	0	0	0	0	0	0	0	0	0	D_0__Bacteria;D_1__Bacteroidetes;D_2__Bacteroidia;D_3__Cytophagales;D_4__Hymenobacteraceae;D_5__Adhaeribacter;D_6__Adhaeribacter sp. KS35
f82ca2315386fecb7e0a42c5c517fb36	0	3	1	0	0	0	0	0	0	0	0	2	0	0	0	0	0	0	0	0	0	0	0	0	0	0	1	0	0	0	4	1	0	0	0	0	D_0__Bacteria
7f83ed97a50d1905fa2a07fce2be135b	2	0	0	0	0	0	0	2	0	1	0	0	2	0	0	0	0	0	1	0	1	5	2	0	0	3	0	0	1	0	5	2	1	2	3	3	D_0__Bacteria;D_1__Acidobacteria;D_2__Subgroup 6
b459aea4c1669669fa2c668f193c4dbf	0	0	0	0	0	0	0	0	0	0	0	0	0	0	0	0	0	0	0	0	0	0	0	0	0	0	1	0	1	2	0	0	0	0	0	2	D_0__Bacteria;D_1__Proteobacteria;D_2__Gammaproteobacteria;D_3__Gammaproteobacteria Incertae Sedis;D_4__Unknown Family;D_5__Candidatus Ovatusbacter;D_6__uncultured proteobacterium
50dbd59d4224a1e788ba0197022679f3	0	0	0	0	0	0	0	0	0	0	0	0	0	0	0	0	0	0	0	0	0	0	0	0	0	0	6	0	2	3	0	0	0	0	0	0	D_0__Bacteria;D_1__Acidobacteria;D_2__Subgroup 6;D_3__Acidobacteria bacterium SCN 69-37;D_4__Acidobacteria bacterium SCN 69-37;D_5__Acidobacteria bacterium SCN 69-37;D_6__Acidobacteria bacterium SCN 69-37
1b8f45842ff74acb3a4ad8e52ea0e16f	0	0	0	0	0	0	0	0	0	0	0	0	0	0	0	0	0	2	0	0	0	1	0	0	0	0	0	0	0	0	0	0	3	0	3	0	D_0__Bacteria;D_1__Acidobacteria;D_2__Subgroup 11;D_3__uncultured soil bacterium;D_4__uncultured soil bacterium;D_5__uncultured soil bacterium;D_6__uncultured soil bacterium
459ab5c19d9926e66b7571339637e3c5	0	0	0	0	0	0	0	0	1	1	0	0	2	0	1	0	0	0	0	0	0	0	0	0	2	0	0	3	0	2	0	0	0	1	0	0	D_0__Bacteria;D_1__Actinobacteria;D_2__Thermoleophilia;D_3__Gaiellales;D_4__Gaiellaceae;D_5__Gaiella;D_6__uncultured Conexibacteraceae bacterium
0462f33040f81c90d12de203eacd630b	0	0	0	0	0	0	0	0	0	0	0	0	0	0	0	0	0	1	0	0	0	1	2	0	0	1	0	0	3	0	0	0	0	0	0	0	D_0__Bacteria;D_1__Proteobacteria;D_2__Gammaproteobacteria;D_3__Betaproteobacteriales;D_4__SC-I-84
98dfa6a03a0fb2ccd65136c36720f0b6	0	0	0	0	0	0	0	0	0	0	0	0	0	2	6	0	11	0	0	4	1	1	2	3	2	2	1	0	3	3	0	0	0	0	0	0	D_0__Bacteria;D_1__Acidobacteria;D_2__Acidobacteriia;D_3__Acidobacteriales;D_4__uncultured;D_5__bacterium Ellin7529;D_6__bacterium Ellin7529
3e5b10f565b288a28e7d1ab3cd5d3beb	0	0	0	0	0	0	0	0	0	1	0	0	0	0	0	0	0	0	0	0	0	0	0	0	0	0	0	0	0	0	1	1	2	0	0	0	D_0__Bacteria;D_1__Latescibacteria
7f7299ba8faa39f8cb2425258daaadcd	0	1	0	0	0	0	0	0	0	0	0	0	1	1	1	0	0	0	2	1	0	0	0	0	2	0	2	3	0	0	0	0	0	0	0	0	D_0__Bacteria;D_1__Actinobacteria;D_2__Acidimicrobiia;D_3__Microtrichales;D_4__Iamiaceae;D_5__Iamia;D_6__uncultured Iamiaceae bacterium
58ccf708bb09198b169033704a8236be	1	1	0	0	0	3	0	0	0	2	1	0	0	0	0	0	0	0	1	0	0	1	3	0	0	0	3	3	2	0	2	0	1	1	3	2	D_0__Bacteria;D_1__Proteobacteria;D_2__Alphaproteobacteria;D_3__Rhizobiales;D_4__Beijerinckiaceae;D_5__Methylocystis
4ec29e60a2b4a0b6ec98dd9de1bdfd2f	3	0	0	0	0	0	0	0	0	0	0	1	0	3	0	0	0	0	0	0	0	0	0	0	0	1	0	0	0	0	0	0	0	0	0	0	D_0__Bacteria;D_1__Gemmatimonadetes;D_2__Gemmatimonadetes;D_3__Gemmatimonadales;D_4__Gemmatimonadaceae
46339929ee89034a44222f039fd834fa	47	104	30	73	63	41	54	89	158	77	53	112	87	44	37	31	20	43	36	25	20	53	34	46	41	41	33	26	11	42	58	53	23	84	47	52	D_0__Bacteria;D_1__Bacteroidetes;D_2__Bacteroidia;D_3__Chitinophagales;D_4__Chitinophagaceae;D_5__Terrimonas
db6a6cdb3295859f44c6302077fcc0af	0	0	0	0	0	0	0	0	0	0	0	0	1	0	2	2	0	0	0	0	1	0	0	0	0	2	0	0	0	0	0	0	0	0	0	0	D_0__Bacteria;D_1__Acidobacteria;D_2__Acidobacteriia;D_3__Solibacterales;D_4__Solibacteraceae (Subgroup 3);D_5__Candidatus Solibacter;D_6__bacterium Ellin6505
f0b420d43942a63973ec8b99388a26a5	0	0	0	0	0	0	0	0	0	1	0	0	0	0	1	0	0	0	0	0	0	0	0	0	0	0	0	0	0	0	0	0	0	0	0	0	D_0__Bacteria;D_1__Acidobacteria;D_2__Acidobacteriia;D_3__Solibacterales;D_4__Solibacteraceae (Subgroup 3);D_5__Candidatus Solibacter;D_6__bacterium Ellin6505
82171afdd146cdc72028be9384f2b25d	0	0	0	0	0	0	0	0	0	1	0	0	11	2	4	3	3	5	3	3	7	2	11	4	4	12	7	8	6	11	0	0	0	0	0	0	D_0__Bacteria;D_1__Proteobacteria;D_2__Gammaproteobacteria;D_3__Betaproteobacteriales;D_4__SC-I-84
cf989cf479225d377d5b6741710d02e1	0	0	0	0	0	0	0	1	0	2	0	0	0	0	0	2	0	0	0	0	0	0	0	1	0	1	0	0	0	0	0	0	0	0	1	0	D_0__Bacteria;D_1__Actinobacteria;D_2__Acidimicrobiia;D_3__IMCC26256;D_4__uncultured organism;D_5__uncultured organism;D_6__uncultured organism
51afc4675a11a7c34599e787b98c9d7d	0	0	0	0	0	0	0	0	0	0	0	0	0	0	3	1	0	0	0	0	0	0	0	0	0	0	0	0	0	0	2	0	0	0	0	0	D_0__Bacteria;D_1__Bacteroidetes;D_2__Bacteroidia;D_3__Flavobacteriales;D_4__Flavobacteriaceae;D_5__Flavobacterium
25a2e5ccc709d6f0b934f518b3860786	0	0	1	0	0	0	2	0	2	1	0	1	4	1	0	0	4	4	3	1	1	0	3	1	5	5	1	3	1	1	4	2	1	8	3	3	D_0__Bacteria;D_1__Proteobacteria;D_2__Gammaproteobacteria;D_3__Betaproteobacteriales;D_4__SC-I-84
7cb5e81e1260b62119bb57c2b465a668	0	0	0	0	0	0	0	0	3	0	0	2	0	0	0	3	0	0	0	0	0	0	0	1	0	0	0	0	0	0	0	0	0	0	0	0	D_0__Bacteria;D_1__Proteobacteria;D_2__Gammaproteobacteria;D_3__Betaproteobacteriales;D_4__SC-I-84
1e35dd2d34eff42a5089d492c1b5b554	0	0	0	0	0	0	0	0	0	0	0	0	0	0	0	0	0	0	0	1	0	0	0	0	0	0	0	0	0	0	0	0	0	0	0	0	D_0__Bacteria;D_1__Proteobacteria;D_2__Gammaproteobacteria
78fd0b751cf8fc9644bf418ac995478b	0	0	0	0	0	0	0	0	0	0	1	0	0	0	0	0	0	0	0	1	0	1	0	0	0	0	0	0	1	0	5	0	0	0	4	0	D_0__Bacteria;D_1__Proteobacteria;D_2__Alphaproteobacteria;D_3__Rhizobiales;D_4__Devosiaceae;D_5__Devosia
561770f62b98da76423d434647df80fe	123	299	117	122	164	121	115	141	112	159	84	122	82	51	56	59	153	59	141	191	91	170	129	59	65	54	78	113	80	68	128	114	153	165	110	116	D_0__Bacteria;D_1__Nitrospirae;D_2__Nitrospira;D_3__Nitrospirales;D_4__Nitrospiraceae;D_5__Nitrospira;D_6__Nitrospira japonica
101e5a0ea2359a04d0c0ddc146bb061b	2	3	4	3	2	0	0	2	2	2	1	2	0	2	0	0	0	0	3	0	0	2	0	0	0	2	3	0	0	0	0	0	1	0	0	2	D_0__Bacteria;D_1__Verrucomicrobia;D_2__Verrucomicrobiae;D_3__Pedosphaerales;D_4__Pedosphaeraceae;D_5__ADurb.Bin063-1;D_6__uncultured prokaryote
a5cc8979a29eae8252397653eb9df62a	1	1	1	4	1	0	1	0	0	2	0	0	0	0	0	0	0	0	0	0	0	0	0	0	0	0	0	0	0	0	0	0	1	0	0	0	D_0__Bacteria;D_1__Proteobacteria;D_2__Gammaproteobacteria;D_3__Betaproteobacteriales;D_4__SC-I-84
674bd89918f91527690b827eba6bc0e0	0	0	0	2	0	1	3	0	1	0	0	1	0	0	2	0	0	0	0	0	2	0	0	1	0	0	0	0	0	0	0	0	0	0	0	0	D_0__Bacteria;D_1__Bacteroidetes;D_2__Bacteroidia;D_3__Chitinophagales;D_4__Chitinophagaceae;D_5__Filimonas
da21c9659769b74dc21392129123b325	0	0	0	0	1	0	3	1	1	3	0	3	0	3	0	0	2	0	0	0	3	2	0	1	1	0	0	0	0	0	2	0	2	1	0	1	D_0__Bacteria;D_1__Proteobacteria;D_2__Alphaproteobacteria;D_3__Acetobacterales;D_4__Acetobacteraceae
aa8221f8c19e8318e8b5a89fd0eee19b	0	0	0	6	0	2	0	3	0	1	4	0	0	0	0	1	0	2	0	0	0	0	0	0	0	1	0	3	0	4	0	2	0	0	2	7	D_0__Bacteria;D_1__Proteobacteria;D_2__Gammaproteobacteria;D_3__Betaproteobacteriales;D_4__Methylophilaceae;D_5__Methylophilus
1444a990eb16d2c5859dc583a38385c7	0	0	0	0	1	3	1	5	6	3	1	3	2	3	3	0	0	3	2	3	2	1	2	0	1	1	1	0	1	2	8	1	1	8	3	4	D_0__Bacteria;D_1__Actinobacteria;D_2__Actinobacteria;D_3__Propionibacteriales;D_4__Nocardioidaceae;D_5__Nocardioides
0297ed418b66aa0c00c2097ad72a03db	0	2	0	2	0	0	0	0	0	0	0	0	1	0	0	0	0	0	1	1	0	0	0	0	0	0	0	0	0	0	0	0	0	0	0	0	D_0__Bacteria;D_1__Chloroflexi;D_2__Ktedonobacteria;D_3__Ktedonobacterales;D_4__JG30-KF-AS9;D_5__uncultured bacterium;D_6__uncultured bacterium
dd0827ead760e3090fbb05bb4505d3e9	0	0	0	0	0	0	0	0	0	0	0	0	0	0	0	0	0	0	0	0	0	0	0	0	0	2	0	0	6	0	0	0	1	0	0	0	D_0__Bacteria;D_1__Proteobacteria;D_2__Gammaproteobacteria;D_3__Pseudomonadales;D_4__Pseudomonadaceae;D_5__Pseudomonas
de0cd9c3fe21ad6051455caa81eb0040	0	4	0	1	0	3	0	1	0	2	1	2	3	0	0	0	3	1	2	3	0	2	0	0	0	2	1	2	0	0	2	0	3	0	3	0	D_0__Bacteria;D_1__Proteobacteria;D_2__Gammaproteobacteria
f6512315c9cf14f68df287b55a0e2a89	0	0	2	1	0	5	2	2	0	0	1	0	2	1	0	0	0	0	2	0	0	1	0	0	1	2	0	0	1	1	2	0	0	0	2	0	D_0__Bacteria;D_1__Proteobacteria;D_2__Deltaproteobacteria;D_3__Myxococcales;D_4__Haliangiaceae;D_5__Haliangium
30b84d76d2d05f091490b40d77ebbb83	0	0	0	2	1	1	1	0	3	0	2	4	0	4	1	0	0	3	2	0	2	0	0	2	4	2	0	3	4	7	2	0	0	3	0	0	D_0__Bacteria;D_1__Actinobacteria;D_2__Thermoleophilia;D_3__Solirubrobacterales;D_4__Solirubrobacteraceae;D_5__Solirubrobacter
2042f6c8d36a2d6b0b2d647a77ddb5e7	0	1	2	2	2	0	2	0	0	1	0	0	0	3	1	0	5	1	6	0	6	0	4	0	0	0	3	0	2	0	0	0	2	0	0	0	D_0__Bacteria;D_1__Nitrospirae;D_2__Nitrospira;D_3__Nitrospirales;D_4__Nitrospiraceae;D_5__Nitrospira;D_6__uncultured Green Bay ferromanganous micronodule bacterium MNB2
4e04b679e171a621071910845b124159	0	0	2	0	0	0	0	0	0	0	0	0	0	0	0	0	0	0	0	0	0	0	0	0	0	0	0	2	0	0	0	0	1	0	0	0	D_0__Bacteria;D_1__Acidobacteria;D_2__Blastocatellia (Subgroup 4);D_3__Pyrinomonadales;D_4__Pyrinomonadaceae;D_5__RB41;D_6__uncultured delta proteobacterium
0404d136eac7b1125aabd29dd3284fce	0	0	1	0	0	0	3	0	0	0	0	0	0	0	0	0	0	0	0	0	0	0	0	0	0	0	0	0	0	0	0	2	0	0	2	0	D_0__Bacteria;D_1__Proteobacteria;D_2__Gammaproteobacteria;D_3__Betaproteobacteriales
1e8261895b09ee6e06f147d6212aa8aa	0	0	0	0	0	0	0	0	0	0	0	0	0	2	0	0	0	0	0	0	0	0	0	0	1	0	0	0	0	0	2	0	0	0	2	0	D_0__Bacteria;D_1__Proteobacteria;D_2__Alphaproteobacteria;D_3__Sphingomonadales;D_4__Sphingomonadaceae;D_5__Sphingobium
d316e96b3a6334ae25a73e666c98c2af	0	0	0	0	0	0	0	0	0	0	0	2	3	1	0	0	0	1	1	3	0	1	3	0	0	0	2	3	0	2	0	0	0	0	1	0	D_0__Bacteria;D_1__Actinobacteria;D_2__MB-A2-108;D_3__uncultured Firmicutes bacterium;D_4__uncultured Firmicutes bacterium;D_5__uncultured Firmicutes bacterium;D_6__uncultured Firmicutes bacterium
61e8a1b04b98f58edde626753de8fb1d	0	0	0	0	0	0	0	0	1	0	0	0	3	0	0	0	0	0	0	0	0	0	0	0	0	0	0	0	0	0	4	0	0	3	0	0	D_0__Bacteria;D_1__Verrucomicrobia;D_2__Verrucomicrobiae;D_3__Pedosphaerales;D_4__Pedosphaeraceae;D_5__bacterium Ellin516;D_6__bacterium Ellin516
7c707611ece9bb52a600a43438df73a8	2	1	0	0	0	0	0	1	2	0	0	0	0	0	0	0	0	0	0	0	0	0	0	0	0	0	0	0	1	0	0	0	0	0	0	0	D_0__Bacteria;D_1__Bacteroidetes;D_2__Bacteroidia;D_3__Chitinophagales;D_4__Chitinophagaceae;D_5__Ferruginibacter
c89a6a74b09ebb3555ac71c2762d5ea1	4	0	0	0	0	0	0	1	1	3	0	2	1	0	0	7	1	1	0	9	1	2	3	1	0	2	2	2	0	0	1	0	1	0	1	1	D_0__Bacteria;D_1__Verrucomicrobia;D_2__Verrucomicrobiae;D_3__Chthoniobacterales;D_4__Chthoniobacteraceae;D_5__Candidatus Udaeobacter
c39e041dd293ebdbe5a73773ecb4b0ce	0	0	0	0	0	0	0	0	0	0	0	0	0	1	0	0	0	0	0	1	0	1	0	1	0	0	1	0	0	0	0	0	0	0	0	0	D_0__Bacteria;D_1__Verrucomicrobia;D_2__Verrucomicrobiae;D_3__Chthoniobacterales;D_4__Chthoniobacteraceae;D_5__Candidatus Udaeobacter
a6d97c1e667f3c42ead86014bd44feda	0	0	0	2	0	0	0	0	1	0	0	0	0	0	1	0	0	3	0	0	0	0	0	0	0	0	0	0	0	2	0	0	0	0	0	0	D_0__Bacteria;D_1__Proteobacteria;D_2__Gammaproteobacteria;D_3__Betaproteobacteriales;D_4__Burkholderiaceae
3af79c743bc06c9702260cb66932936a	0	0	0	0	0	0	0	0	0	0	1	0	0	0	3	0	0	0	0	0	1	0	0	0	0	0	0	0	0	0	0	0	0	0	3	1	D_0__Bacteria;D_1__Acidobacteria;D_2__Subgroup 6
b8d4dc15adcb2fac5f581ccb8c17ea04	0	0	0	0	0	0	2	0	0	0	0	0	0	1	2	0	0	0	0	0	0	0	0	0	1	0	0	0	0	0	0	0	0	0	0	0	D_0__Bacteria;D_1__Proteobacteria;D_2__Gammaproteobacteria;D_3__Xanthomonadales;D_4__Rhodanobacteraceae;D_5__Rhodanobacter
639a6866c2cd9d8b4491caa569b53f18	0	0	0	0	0	0	0	2	0	0	1	0	0	0	0	0	0	0	0	0	0	0	0	0	0	0	0	0	2	0	0	0	1	0	5	0	D_0__Bacteria;D_1__Proteobacteria;D_2__Gammaproteobacteria;D_3__Xanthomonadales;D_4__Xanthomonadaceae;D_5__Stenotrophomonas
5f67686beb5cb02494da58ef15b9b9fa	0	0	4	0	1	1	0	0	3	4	0	0	0	1	10	0	4	1	2	0	0	3	0	5	0	7	3	1	0	4	0	2	6	3	1	5	D_0__Bacteria;D_1__Gemmatimonadetes;D_2__Gemmatimonadetes;D_3__Gemmatimonadales;D_4__Gemmatimonadaceae;D_5__Gemmatimonas
aa83f7abb3f3c5e56f1175264adddf09	5	2	0	14	2	0	3	3	3	6	2	4	1	0	0	0	7	0	1	0	3	2	0	3	3	5	4	0	7	7	4	5	1	3	5	2	D_0__Bacteria;D_1__Acidobacteria;D_2__Acidobacteriia;D_3__Acidobacteriales;D_4__Acidobacteriaceae (Subgroup 1)
810f4d5516c3fbb9d72aa66b926543af	0	0	0	0	3	0	0	0	0	0	0	0	0	0	0	0	0	0	0	0	0	0	0	0	0	0	0	0	0	0	0	0	0	0	0	1	D_0__Bacteria;D_1__Proteobacteria;D_2__Deltaproteobacteria;D_3__Myxococcales;D_4__Sandaracinaceae;D_5__uncultured
d0813fc4cda07de69df693b45f81e5fc	0	0	0	0	0	0	0	0	0	2	0	0	0	0	0	0	0	0	0	0	0	0	0	0	0	0	0	0	0	0	0	0	0	0	0	0	D_0__Bacteria;D_1__Proteobacteria;D_2__Deltaproteobacteria;D_3__Myxococcales;D_4__Haliangiaceae;D_5__Haliangium
85dfbed1a181b1047bcd04fdab793ac9	2	0	0	0	0	0	2	1	0	0	1	0	2	0	4	0	0	2	0	0	0	0	2	1	0	2	0	2	0	2	0	1	2	0	0	0	D_0__Bacteria;D_1__Proteobacteria;D_2__Gammaproteobacteria;D_3__Betaproteobacteriales;D_4__Burkholderiaceae
297da93f2efdb4dbc9a7905c5e11a995	0	0	0	0	0	0	0	0	0	0	0	0	0	0	2	0	0	0	0	0	2	0	0	0	0	0	0	0	0	0	0	1	0	0	0	1	D_0__Bacteria;D_1__Gemmatimonadetes;D_2__Gemmatimonadetes;D_3__Gemmatimonadales;D_4__Gemmatimonadaceae;D_5__uncultured
f2fb4710a96f9cc2efbed514e3d3c2b1	0	0	0	0	0	0	0	0	0	0	0	0	0	0	0	0	0	0	0	0	0	0	0	0	0	0	0	0	0	0	1	0	0	0	4	0	D_0__Bacteria;D_1__Latescibacteria;D_2__uncultured Fibrobacteres bacterium;D_3__uncultured Fibrobacteres bacterium;D_4__uncultured Fibrobacteres bacterium;D_5__uncultured Fibrobacteres bacterium;D_6__uncultured Fibrobacteres bacterium
f456b5c736d21d86684b5162cf0029a8	0	0	0	0	0	0	0	1	0	0	1	0	0	3	0	2	0	0	0	0	0	2	0	0	0	0	3	2	0	0	0	2	2	3	0	1	D_0__Bacteria;D_1__Chloroflexi;D_2__JG30-KF-CM66;D_3__metagenome;D_4__metagenome;D_5__metagenome;D_6__metagenome
0effb549d0797a1a5284df8308d082c8	0	1	0	2	0	0	0	0	2	0	0	0	1	0	1	2	0	0	0	0	0	1	0	0	4	0	0	0	0	0	0	0	0	0	0	2	D_0__Bacteria;D_1__Acidobacteria;D_2__Acidobacteriia;D_3__Acidobacteriales;D_4__Acidobacteriaceae (Subgroup 1);D_5__Granulicella;D_6__bacterium enrichment culture clone auto193_4W
516b2edcd557c562c276f71ccbf8ab74	2	0	0	0	0	0	0	0	0	0	2	0	0	0	1	0	0	1	2	0	0	3	5	0	0	1	0	0	0	0	0	1	1	1	3	0	D_0__Bacteria;D_1__Proteobacteria;D_2__Alphaproteobacteria;D_3__Rhizobiales;D_4__Devosiaceae;D_5__Devosia
1da8e5c3fa9a882a565803792b98e9f6	1	0	0	1	1	2	0	0	2	0	0	0	0	0	0	0	0	1	0	0	0	0	0	0	1	0	0	0	0	0	0	0	0	0	0	0	D_0__Bacteria;D_1__Proteobacteria;D_2__Deltaproteobacteria;D_3__Myxococcales;D_4__Haliangiaceae;D_5__Haliangium
f878cc8171b2daff3c2e6fb23c1e3397	0	0	0	0	0	0	0	0	0	3	2	2	0	0	1	0	0	0	0	0	0	0	0	0	0	0	0	0	0	0	1	0	1	0	0	0	D_0__Bacteria;D_1__Proteobacteria;D_2__Alphaproteobacteria;D_3__Micropepsales;D_4__Micropepsaceae;D_5__uncultured
0b3532955e374f5f997c5bfdcc1ad67c	0	0	0	0	0	0	0	0	0	0	0	0	1	0	0	0	0	0	0	0	0	0	0	0	0	1	0	0	0	0	0	0	0	0	0	0	D_0__Bacteria;D_1__Planctomycetes;D_2__Phycisphaerae;D_3__Phycisphaerales;D_4__Phycisphaeraceae;D_5__SM1A02
6e2f624ed26793be2f731c2103060f8f	0	0	0	0	1	0	0	0	0	0	0	0	0	0	0	0	0	0	0	0	0	0	0	0	0	0	0	0	0	0	0	0	0	0	0	0	D_0__Bacteria;D_1__Proteobacteria;D_2__Gammaproteobacteria;D_3__Xanthomonadales;D_4__Xanthomonadaceae
f1438426cfd95a11a990f410db7cbe8f	0	0	0	0	1	0	0	0	0	3	0	0	0	0	2	0	0	0	0	0	0	0	0	0	0	0	0	0	2	1	0	0	0	0	0	0	D_0__Bacteria;D_1__Proteobacteria;D_2__Alphaproteobacteria;D_3__Rhizobiales;D_4__Hyphomicrobiaceae
ffcf309c564e3dd0f9a35c85b133c89e	0	0	0	0	0	0	0	0	0	0	0	3	0	0	0	0	0	3	0	0	0	0	0	0	0	0	0	0	0	0	0	0	0	0	0	4	D_0__Bacteria;D_1__Firmicutes;D_2__Clostridia;D_3__Clostridiales;D_4__Family XI;D_5__Ezakiella
da7f61f46a6b17be3e8c95473558cafa	0	0	0	0	0	0	0	0	0	0	0	1	0	0	0	0	0	0	0	0	0	0	1	0	0	0	0	0	0	0	0	0	0	0	0	0	D_0__Bacteria;D_1__Actinobacteria;D_2__Thermoleophilia;D_3__Gaiellales;D_4__uncultured;D_5__bacterium Ellin7530;D_6__bacterium Ellin7530
8e17cf759d7fa65adbd9e4447d696135	2	1	0	1	0	0	0	0	2	0	3	0	0	0	0	0	3	0	1	0	0	0	0	0	0	1	0	0	1	0	0	3	2	3	0	3	D_0__Bacteria;D_1__Acidobacteria;D_2__Subgroup 6
6ed416ef882730443c9772fc3b441c32	0	0	0	0	0	0	1	0	0	1	0	1	0	0	0	0	0	0	0	0	0	0	0	0	0	0	1	0	0	0	1	1	1	0	1	0	D_0__Bacteria;D_1__Proteobacteria;D_2__Alphaproteobacteria;D_3__Rhodospirillales;D_4__Rhodopirillaceae;D_5__Defluviicoccus
2757e771ec80099ee3ba2f2c0227786f	0	0	2	1	0	0	0	0	0	0	0	0	3	0	0	0	0	0	0	0	0	0	0	1	0	0	0	0	0	0	0	2	0	0	0	0	D_0__Bacteria;D_1__Actinobacteria;D_2__Actinobacteria;D_3__Micrococcales;D_4__Dermatophilaceae;D_5__uncultured;D_6__uncultured actinobacterium
323cf942cb0ba70f615821a131d729f2	1	0	1	2	0	0	0	2	3	1	0	3	1	2	3	4	0	2	0	0	0	4	0	3	3	0	1	0	0	0	0	0	0	0	0	0	D_0__Bacteria;D_1__Acidobacteria;D_2__Subgroup 6
940b3ff4f607f6b54b72b0ab18754828	2	0	2	1	0	0	0	0	0	0	0	1	1	0	1	0	0	0	0	0	0	0	0	0	0	4	0	0	0	0	0	0	0	0	0	0	D_0__Bacteria;D_1__Proteobacteria;D_2__Gammaproteobacteria;D_3__Steroidobacterales;D_4__Steroidobacteraceae;D_5__uncultured
ec8660d865d8178d7ebf78de014e9df0	0	0	1	0	0	0	0	0	0	0	2	0	0	0	0	0	0	0	0	0	0	0	0	0	0	0	0	0	0	0	0	0	0	0	0	0	D_0__Bacteria;D_1__Bacteroidetes;D_2__Bacteroidia;D_3__Chitinophagales;D_4__Saprospiraceae;D_5__Phaeodactylibacter;D_6__uncultured Haliscomenobacter sp.
c37990a337b404487172d64d0652edb9	0	0	0	0	0	0	1	0	0	0	0	0	0	0	0	0	0	0	0	0	0	0	0	0	2	0	2	0	0	0	0	0	0	1	0	0	D_0__Bacteria;D_1__Proteobacteria;D_2__Deltaproteobacteria;D_3__Myxococcales;D_4__Sandaracinaceae;D_5__uncultured
692695bf5b012ad1527cfd5a376bf540	0	0	0	1	0	0	0	0	2	0	9	0	0	0	0	0	0	0	0	0	0	0	0	0	0	0	0	0	0	0	0	0	0	0	0	0	D_0__Bacteria;D_1__Proteobacteria;D_2__Deltaproteobacteria;D_3__Myxococcales;D_4__Haliangiaceae;D_5__Haliangium
0046598393c8b8271ea1bd01306cccea	0	1	0	0	0	0	0	0	0	0	0	0	0	0	0	0	0	0	2	0	0	0	0	0	0	0	3	0	0	0	4	0	0	0	1	0	D_0__Bacteria;D_1__Proteobacteria;D_2__Deltaproteobacteria;D_3__Myxococcales;D_4__Haliangiaceae;D_5__Haliangium
3a90a9d955dc73a5b32efe6fc9d46113	1	0	0	0	0	0	1	1	0	0	2	0	0	0	1	0	0	0	0	0	0	0	0	0	2	0	0	0	0	0	1	0	0	3	1	0	D_0__Bacteria;D_1__Gemmatimonadetes;D_2__Gemmatimonadetes;D_3__Gemmatimonadales;D_4__Gemmatimonadaceae;D_5__uncultured
8d7a10783a65dcc7f3d07652e759f3d9	0	0	0	0	0	0	0	0	0	1	0	1	0	0	0	0	0	0	0	0	0	0	0	0	0	0	0	2	0	1	0	0	0	0	0	0	D_0__Bacteria;D_1__Proteobacteria;D_2__Alphaproteobacteria;D_3__Sphingomonadales;D_4__Sphingomonadaceae;D_5__Sphingomonas
a3de359ccefdfea62924b7a01c3292e8	0	0	0	0	0	0	0	0	0	0	0	0	1	0	2	0	0	0	0	0	0	0	3	1	0	0	0	0	0	0	0	0	0	0	0	0	D_0__Bacteria;D_1__Proteobacteria;D_2__Alphaproteobacteria;D_3__Caulobacterales;D_4__Caulobacteraceae
2f12765cad13950114ad1b44c534f262	0	0	1	0	0	2	0	0	0	0	0	0	0	0	0	0	0	0	0	0	0	0	0	0	0	0	0	0	0	0	0	0	0	0	0	0	D_0__Bacteria;D_1__Bacteroidetes;D_2__Bacteroidia
ba669aa84ff4a01100de2d57011425bb	8	27	4	0	0	0	0	0	0	0	0	0	18	17	11	6	1	1	0	0	0	9	9	4	17	0	7	21	7	7	22	46	9	1	7	22	D_0__Archaea;D_1__Thaumarchaeota;D_2__Nitrososphaeria;D_3__Nitrososphaerales;D_4__Nitrososphaeraceae
61785ad288b1f2a7a6c064a4779406a4	15	24	31	11	16	19	5	21	19	12	16	13	11	3	8	10	15	16	25	7	7	19	7	12	7	6	13	4	5	2	6	10	16	5	13	12	D_0__Bacteria;D_1__Proteobacteria;D_2__Gammaproteobacteria;D_3__Xanthomonadales;D_4__Rhodanobacteraceae;D_5__Dokdonella
13e41605a07cde2b8c0f3ae8d7400fa0	1	0	2	4	3	0	3	0	0	0	0	0	0	0	0	0	2	2	4	0	0	1	0	0	0	0	2	0	0	0	0	8	2	0	0	3	D_0__Bacteria;D_1__Proteobacteria;D_2__Gammaproteobacteria;D_3__Betaproteobacteriales;D_4__SC-I-84
b6dcd81f2054e1d90e8deab253b32f8f	4	0	4	2	1	6	3	0	1	1	0	3	0	0	0	0	2	0	0	0	3	1	1	0	0	4	3	2	1	0	0	2	0	0	0	0	D_0__Bacteria;D_1__Proteobacteria;D_2__Alphaproteobacteria;D_3__Rhizobiales;D_4__Xanthobacteraceae
ea031f6178be2a1b779c650f773999ee	2	1	4	0	6	32	0	0	0	0	0	1	0	0	0	1	0	0	0	0	0	0	0	0	0	0	0	2	0	0	0	1	2	0	4	0	D_0__Bacteria;D_1__Proteobacteria;D_2__Gammaproteobacteria;D_3__Diplorickettsiales;D_4__Diplorickettsiaceae;D_5__uncultured
181b798b6f8cc678e24df1f8891ef1df	0	0	2	0	1	0	0	0	0	0	2	0	0	3	3	0	0	0	0	0	2	0	0	32	8	0	0	0	0	0	0	1	0	0	5	7	D_0__Bacteria;D_1__Bacteroidetes;D_2__Bacteroidia;D_3__Flavobacteriales;D_4__Flavobacteriaceae;D_5__Flavobacterium
1f1a671c3be09689c7cfd66e4865e3bd	0	0	0	0	0	0	0	0	0	0	0	0	0	0	0	0	0	0	0	0	0	0	0	0	1	0	3	0	0	2	0	0	0	0	1	0	D_0__Bacteria;D_1__Acidobacteria;D_2__Acidobacteriia;D_3__Acidobacteriales;D_4__uncultured;D_5__uncultured Acidobacterium UA3;D_6__uncultured Acidobacterium UA3
b49944c15281190ff08a34896fa16876	1	4	1	0	3	4	0	2	0	0	0	2	1	2	2	0	0	0	0	0	1	0	0	2	0	0	1	0	0	0	0	0	6	1	0	1	D_0__Bacteria;D_1__Proteobacteria;D_2__Gammaproteobacteria;D_3__Xanthomonadales;D_4__Xanthomonadaceae
6b08d114602bf23a537aff88a5fe7f95	7	4	1	3	3	2	0	1	0	0	2	1	2	0	2	1	0	2	0	3	0	5	3	0	2	1	0	2	3	0	1	3	1	3	2	3	D_0__Bacteria;D_1__Proteobacteria;D_2__Alphaproteobacteria;D_3__Rhizobiales;D_4__Methyloligellaceae;D_5__uncultured
6a6d475acc4a37c63d8ce1fb2cc2af8d	0	0	0	0	0	0	0	2	0	0	0	0	0	0	0	0	0	1	0	0	0	0	0	0	0	0	0	0	0	0	1	0	0	0	0	0	D_0__Bacteria;D_1__Patescibacteria;D_2__Saccharimonadia;D_3__Saccharimonadales;D_4__uncultured gamma proteobacterium;D_5__uncultured gamma proteobacterium;D_6__uncultured gamma proteobacterium
529706695d63fb03a7e54f1b41e37929	0	0	5	0	0	8	0	0	0	0	0	2	0	0	0	0	0	0	0	0	2	0	0	0	1	0	0	0	2	0	0	0	0	0	0	0	D_0__Bacteria;D_1__Acidobacteria;D_2__Subgroup 17
a66035b1cc491643096168ef74b3ddf2	0	0	0	0	1	0	0	0	0	0	0	0	0	0	0	0	0	0	0	0	0	0	0	0	0	0	0	0	0	0	3	0	0	0	0	2	D_0__Bacteria;D_1__Proteobacteria;D_2__Gammaproteobacteria;D_3__Betaproteobacteriales;D_4__SC-I-84
963edbe0e835b65abf4acb9d0aebe39f	0	0	0	0	0	0	0	0	0	0	0	0	0	0	0	0	2	0	0	1	0	0	0	0	0	0	0	0	4	0	0	0	0	0	0	0	D_0__Bacteria;D_1__Bacteroidetes;D_2__Bacteroidia;D_3__Flavobacteriales;D_4__Flavobacteriaceae;D_5__Flavobacterium
29ed440e96679f3f57fbf8b1fd6f8961	0	0	0	0	0	3	0	0	3	0	0	0	0	0	0	0	0	0	0	0	0	0	0	0	0	0	0	0	0	0	0	0	0	0	0	1	D_0__Bacteria;D_1__Armatimonadetes;D_2__Chthonomonadetes;D_3__Chthonomonadales
4fa45154d3f056c7ea647b650464266e	0	0	2	2	0	2	0	0	0	0	1	0	0	0	0	0	0	0	0	0	0	0	0	0	0	0	2	0	0	0	2	0	1	0	0	0	D_0__Bacteria;D_1__Actinobacteria;D_2__Acidimicrobiia;D_3__Microtrichales;D_4__Ilumatobacteraceae
002662756605fb88386efae956e60a3a	0	0	0	0	0	0	0	0	9	0	2	0	0	0	0	0	0	0	0	0	0	0	0	0	0	0	0	0	0	0	1	0	0	0	1	0	D_0__Bacteria;D_1__Proteobacteria;D_2__Gammaproteobacteria;D_3__Betaproteobacteriales;D_4__Burkholderiaceae;D_5__Ralstonia
efc8d4edaebd8597a3ddc9f96ef4ae5a	0	0	0	0	0	0	0	0	0	0	0	0	3	1	0	0	0	3	4	0	0	0	0	3	1	0	0	0	1	0	0	0	0	0	0	0	D_0__Bacteria;D_1__Proteobacteria;D_2__Gammaproteobacteria;D_3__Betaproteobacteriales;D_4__Nitrosomonadaceae;D_5__mle1-7;D_6__uncultured Burkholderiales bacterium
c5c4f3a57a946afb7650614e3a809ac6	0	0	0	0	0	0	0	0	0	0	0	0	0	0	0	0	3	0	1	0	0	0	0	0	0	0	0	0	0	0	0	0	2	0	0	0	D_0__Bacteria;D_1__Firmicutes;D_2__Clostridia;D_3__Clostridiales;D_4__Peptostreptococcaceae
12547b9b70a92c1148815e6d6e466966	10	5	4	5	2	5	1	0	2	0	3	5	0	3	0	0	2	1	3	2	6	2	2	2	1	1	4	0	0	0	4	6	10	1	4	1	D_0__Bacteria;D_1__Actinobacteria;D_2__Actinobacteria;D_3__Propionibacteriales;D_4__Nocardioidaceae
691df923ceba7a191cbb72c00bd5864f	0	2	0	0	0	0	0	0	0	0	0	0	0	0	0	3	2	0	0	7	0	0	0	0	4	0	1	0	0	4	0	0	0	0	0	0	D_0__Bacteria;D_1__Acidobacteria;D_2__Acidobacteriia;D_3__Acidobacteriales;D_4__uncultured;D_5__Acidobacteria bacterium LWQ13;D_6__Acidobacteria bacterium LWQ13
69ddaf7568335013a22618b55c475db5	0	0	0	0	0	0	0	0	0	0	0	0	0	0	0	0	0	0	2	2	2	0	0	0	0	0	0	3	1	0	0	0	0	0	0	0	D_0__Bacteria;D_1__Acidobacteria;D_2__Acidobacteriia;D_3__Solibacterales;D_4__Solibacteraceae (Subgroup 3)
28a2ca6f915408e3e4636c4ff33c2651	0	0	0	0	0	0	0	0	0	0	0	0	0	0	0	0	0	0	0	0	1	0	0	3	1	0	0	0	0	0	0	0	0	0	0	0	D_0__Bacteria;D_1__Bacteroidetes;D_2__Bacteroidia;D_3__Flavobacteriales;D_4__Flavobacteriaceae;D_5__Flavobacterium
449aa4f464bd7e5f46af0ed795d7bdec	0	0	0	0	0	0	0	1	0	0	0	0	0	0	0	0	0	0	4	0	1	0	0	0	0	0	0	0	0	0	0	1	0	0	0	0	D_0__Bacteria;D_1__Verrucomicrobia;D_2__Verrucomicrobiae;D_3__Pedosphaerales;D_4__Pedosphaeraceae
4ddc3f1f98b921dc7bc23138e374bb72	0	0	0	0	0	0	0	0	0	0	0	0	0	0	0	0	2	0	0	0	0	2	0	0	0	0	0	0	0	0	0	0	0	0	0	0	D_0__Bacteria;D_1__Verrucomicrobia;D_2__Verrucomicrobiae;D_3__Pedosphaerales;D_4__Pedosphaeraceae
b5583a79eed1a23948a5fe22d28c842c	0	0	0	0	0	0	0	0	0	0	0	0	0	0	4	0	3	1	0	0	0	2	0	0	2	0	0	2	0	0	0	0	0	0	0	0	D_0__Bacteria;D_1__Actinobacteria;D_2__Acidimicrobiia;D_3__Microtrichales;D_4__Ilumatobacteraceae;D_5__CL500-29 marine group
aeaefbf5e89b6b824c8afd83f5819917	0	0	0	0	0	0	0	1	0	0	0	0	0	0	0	0	0	0	0	0	0	0	0	0	0	0	2	0	0	6	1	2	0	3	3	2	D_0__Archaea;D_1__Euryarchaeota
b3e01df295f301b5223225aa655604af	0	0	0	3	0	0	0	1	4	0	0	0	0	0	2	0	0	0	0	0	0	0	0	0	3	0	0	0	1	0	0	0	0	0	0	2	D_0__Bacteria;D_1__Proteobacteria;D_2__Alphaproteobacteria;D_3__Sphingomonadales;D_4__Sphingomonadaceae
6a0a580cc88aadcb954f9d6b7d99b645	0	6	0	1	2	1	1	0	0	0	0	0	0	0	0	1	3	0	0	0	0	0	0	0	2	0	0	0	0	0	0	0	0	0	0	0	D_0__Bacteria;D_1__Proteobacteria;D_2__Alphaproteobacteria
a440bb30dde8980784fa0eb64ecfcb94	0	0	6	0	0	0	0	0	0	0	0	0	0	0	0	0	0	0	0	0	0	0	0	0	3	0	0	0	0	0	0	0	0	0	0	0	D_0__Bacteria;D_1__Chloroflexi;D_2__Dehalococcoidia;D_3__S085
23861692668dd0f0f66814aca9794a20	0	0	0	0	0	0	0	0	0	0	0	0	1	0	0	0	0	0	0	0	0	0	0	0	0	3	0	0	0	2	0	0	0	0	0	0	D_0__Bacteria;D_1__Actinobacteria
1551b9dcf5233b60b3cc41396c741256	0	2	0	1	0	0	0	1	4	0	0	3	1	0	0	0	2	0	3	1	0	0	2	0	0	0	1	0	0	0	1	2	2	0	6	1	D_0__Bacteria;D_1__Verrucomicrobia;D_2__Verrucomicrobiae;D_3__Pedosphaerales;D_4__Pedosphaeraceae;D_5__uncultured Pedosphaera sp.;D_6__uncultured Pedosphaera sp.
ffac3b1445c80386cb1873568468ce2a	0	0	0	0	0	0	0	0	0	0	1	0	0	0	0	0	0	0	0	0	0	0	0	2	0	0	0	0	0	0	0	0	0	0	0	0	D_0__Bacteria;D_1__Proteobacteria;D_2__Gammaproteobacteria;D_3__Betaproteobacteriales;D_4__Nitrosomonadaceae
c59bd286bfbb4e11a9cb3b0117749632	0	0	0	0	0	0	0	0	0	0	0	0	0	0	0	0	0	0	0	0	0	1	0	0	0	0	0	0	0	0	0	0	2	0	1	0	D_0__Bacteria;D_1__Dadabacteria;D_2__Dadabacteriia;D_3__Dadabacteriales;D_4__Candidatus Dadabacteria bacterium CSP1-2;D_5__Candidatus Dadabacteria bacterium CSP1-2;D_6__Candidatus Dadabacteria bacterium CSP1-2
b737eeb8f62893dde03e2e262f7c5ce6	1	2	0	0	0	0	0	0	0	0	0	0	2	0	0	0	0	0	0	1	0	0	0	0	0	0	0	0	0	0	1	1	0	1	0	0	D_0__Bacteria;D_1__Chloroflexi;D_2__Ktedonobacteria;D_3__Ktedonobacterales;D_4__JG30-KF-AS9;D_5__uncultured bacterium;D_6__uncultured bacterium
8ac89102a2f2b9a8ce503f4f9aab6e01	0	0	0	0	0	0	0	0	0	0	1	1	0	0	0	0	0	0	0	0	0	0	0	0	2	0	0	0	0	0	0	0	0	0	0	0	D_0__Bacteria;D_1__Actinobacteria;D_2__Thermoleophilia;D_3__Gaiellales;D_4__uncultured
546b75371909eb2f774f0ede319090ce	0	0	0	0	0	0	0	0	0	0	0	0	0	0	1	1	0	0	0	1	0	0	0	3	0	0	0	0	0	0	0	0	0	0	0	0	D_0__Bacteria;D_1__Acidobacteria;D_2__Acidobacteriia;D_3__Acidobacteriales
e69928faa855e1763fe2f207845b1fff	0	0	0	0	0	0	0	1	0	0	0	0	0	0	0	0	0	0	0	0	0	0	0	0	0	0	0	0	0	0	0	0	0	2	0	0	D_0__Bacteria;D_1__Proteobacteria;D_2__Deltaproteobacteria;D_3__Myxococcales;D_4__Polyangiaceae
83dd0812c5d92b1d634d77c1d7fa7340	2	0	0	0	4	0	0	0	0	0	1	0	0	0	0	0	0	0	0	0	0	0	0	0	0	0	0	0	0	0	0	0	0	0	0	0	D_0__Bacteria;D_1__Gemmatimonadetes;D_2__Gemmatimonadetes;D_3__Gemmatimonadales;D_4__Gemmatimonadaceae;D_5__Gemmatimonas
2eb11d3d999faab80a3e2d0144b92aac	0	0	1	0	0	0	2	0	3	2	2	0	3	1	1	2	0	1	3	3	2	3	3	0	3	2	1	0	2	1	0	0	2	4	2	3	D_0__Bacteria;D_1__Actinobacteria;D_2__Acidimicrobiia;D_3__Microtrichales
b2406214df7b6e91bf102efbacc43b74	0	1	0	0	0	0	0	0	0	0	0	0	0	0	0	0	0	0	0	0	0	0	0	0	0	0	0	0	0	0	0	0	4	0	1	0	D_0__Bacteria;D_1__Gemmatimonadetes;D_2__Gemmatimonadetes;D_3__Gemmatimonadales;D_4__Gemmatimonadaceae;D_5__Gemmatimonas
1c201de517d5985262a26b2901ea12f0	0	0	0	0	0	0	0	0	0	0	0	0	0	0	0	0	0	0	4	2	0	0	0	0	0	0	2	2	0	0	0	0	0	0	0	0	D_0__Bacteria;D_1__Acidobacteria;D_2__Blastocatellia (Subgroup 4);D_3__Blastocatellales;D_4__Blastocatellaceae
3950d877639a038262b6bbca078fa075	0	3	0	0	1	0	0	0	2	0	1	1	0	0	0	0	0	0	0	0	0	0	0	0	1	0	0	0	0	1	0	0	1	0	0	0	D_0__Bacteria;D_1__Chloroflexi;D_2__Dehalococcoidia;D_3__S085;D_4__uncultured bacterium 5G4;D_5__uncultured bacterium 5G4;D_6__uncultured bacterium 5G4
811c892fc4e5ff6978b5a588ca6df249	0	0	0	0	0	0	0	1	0	0	2	1	2	0	0	0	0	0	3	0	0	0	0	0	0	0	0	0	2	0	1	0	0	0	0	0	D_0__Bacteria;D_1__Proteobacteria;D_2__Alphaproteobacteria;D_3__Acetobacterales;D_4__Acetobacteraceae
58a35fb58047484f5c36adcaebe8c5f6	2	1	0	0	0	0	0	0	0	0	2	0	0	0	0	0	1	0	4	0	0	0	2	1	0	3	4	0	0	0	0	0	1	0	0	1	D_0__Bacteria;D_1__Proteobacteria;D_2__Gammaproteobacteria;D_3__Betaproteobacteriales;D_4__SC-I-84
f10b4f5521b51ce9bf5c4e54f7c23e5d	1	0	2	0	0	0	0	1	0	1	1	0	0	0	0	0	0	1	0	0	0	0	0	0	0	0	0	0	0	0	0	0	0	2	0	0	D_0__Bacteria;D_1__Bacteroidetes;D_2__Bacteroidia;D_3__Cytophagales;D_4__Microscillaceae
5099c81a4bdc7cd497be81f365207005	0	0	0	0	0	0	0	0	0	0	0	0	0	0	0	0	0	0	0	0	2	0	0	0	0	0	0	0	0	0	1	0	3	0	0	3	D_0__Bacteria;D_1__Gemmatimonadetes;D_2__Gemmatimonadetes;D_3__Gemmatimonadales;D_4__Gemmatimonadaceae;D_5__uncultured;D_6__Gemmatimonadetes bacterium LP81
03f3f2d69c015573713903b2cd41cadb	0	0	1	0	1	0	1	0	0	0	1	0	0	0	0	0	0	0	0	0	0	0	2	0	0	0	0	0	0	0	0	0	1	0	0	0	D_0__Bacteria;D_1__Chloroflexi;D_2__Chloroflexia;D_3__Thermomicrobiales;D_4__JG30-KF-CM45;D_5__bacterium Ellin6537;D_6__bacterium Ellin6537
b7084d17e5680494deee1c275940ca81	0	1	0	1	1	3	1	0	0	0	1	1	0	0	0	0	0	1	0	0	0	1	0	0	0	0	0	0	0	0	0	0	0	0	2	0	D_0__Bacteria;D_1__Proteobacteria;D_2__Gammaproteobacteria;D_3__Enterobacteriales;D_4__Enterobacteriaceae;D_5__Escherichia-Shigella
70023a5d2c18d4fcf5f56acf0898b2f0	1	0	5	1	1	0	4	0	0	3	3	0	2	0	0	0	0	1	0	2	0	0	0	0	1	1	1	0	0	0	4	3	8	2	1	4	D_0__Bacteria;D_1__Proteobacteria;D_2__Gammaproteobacteria;D_3__Xanthomonadales;D_4__Xanthomonadaceae
8f6712074728cad3d41e6a33e7b318f4	0	0	3	0	0	2	0	0	0	0	0	0	0	0	0	0	0	0	0	0	0	0	0	0	0	0	0	0	0	0	0	0	0	0	0	0	D_0__Bacteria;D_1__Verrucomicrobia;D_2__Verrucomicrobiae;D_3__Pedosphaerales;D_4__Pedosphaeraceae
72a8623b50d02cc9453a024c8f443ae6	2	5	1	0	2	3	1	4	3	6	2	2	3	4	3	3	1	0	4	1	2	2	0	7	0	0	1	2	2	0	1	1	2	2	0	2	D_0__Bacteria;D_1__Proteobacteria;D_2__Alphaproteobacteria;D_3__Micropepsales;D_4__Micropepsaceae;D_5__uncultured
7856c05f088913aa9e041700e747dd52	0	0	0	2	0	0	0	0	0	1	0	0	0	0	0	0	0	0	0	0	0	0	0	0	0	0	0	0	0	0	0	0	0	0	0	0	D_0__Bacteria;D_1__Firmicutes;D_2__Clostridia;D_3__Clostridiales;D_4__Family XI;D_5__Anaerococcus;D_6__Anaerococcus senegalensis JC48
513d586027db813a9c2b7afe6ad6a800	0	0	0	0	0	0	0	0	2	0	0	2	0	0	0	0	0	0	0	1	1	0	0	0	0	0	0	0	1	0	0	0	0	0	0	0	D_0__Bacteria;D_1__Proteobacteria;D_2__Gammaproteobacteria;D_3__Gammaproteobacteria Incertae Sedis;D_4__Unknown Family;D_5__Acidibacter;D_6__uncultured eubacterium WD2124
4dabdcfde7a0242c1e5810072716c6f8	13	11	11	9	17	8	7	13	9	21	8	13	12	7	4	0	8	7	15	0	9	15	15	4	1	14	8	9	10	3	7	22	19	16	19	11	D_0__Bacteria;D_1__Proteobacteria;D_2__Alphaproteobacteria
6473e2179d6f50d14e62103cf42a3386	0	0	0	1	3	1	1	1	2	1	3	1	0	0	0	0	0	1	0	0	0	1	0	0	0	0	0	0	0	0	0	0	0	2	0	2	D_0__Bacteria;D_1__Proteobacteria;D_2__Deltaproteobacteria;D_3__Myxococcales;D_4__Sandaracinaceae;D_5__uncultured;D_6__uncultured marine bacterium
c0cde0cd685ff98b95bfb0834f06374b	2	6	2	3	3	4	3	8	2	4	2	4	3	0	0	1	2	2	0	1	2	0	3	2	1	0	2	2	0	3	1	1	1	5	1	1	D_0__Bacteria;D_1__Acidobacteria;D_2__Acidobacteriia;D_3__Solibacterales;D_4__Solibacteraceae (Subgroup 3)
3cf52376eab573e8b9ec15f4b86f94b7	0	0	0	0	0	2	0	2	0	0	0	0	0	1	0	2	0	0	1	2	3	0	0	0	2	0	3	0	3	1	0	0	0	0	0	0	D_0__Bacteria;D_1__Acidobacteria;D_2__Holophagae;D_3__Subgroup 7
79c8eabb3f1d698da6b0e89cd6efac69	0	0	0	0	0	0	0	0	0	2	0	0	0	0	2	0	0	1	0	2	0	0	0	0	0	1	0	0	0	0	0	0	0	0	0	0	D_0__Bacteria;D_1__Gemmatimonadetes;D_2__Gemmatimonadetes;D_3__Gemmatimonadales;D_4__Gemmatimonadaceae
5462eb98e7703845841120de7d1cb4b2	0	0	0	0	0	0	0	3	0	0	0	0	0	0	0	0	0	0	0	0	0	1	0	0	0	2	0	0	0	0	0	0	0	0	0	0	D_0__Bacteria;D_1__Nitrospirae;D_2__Nitrospira;D_3__Nitrospirales;D_4__Nitrospiraceae;D_5__Nitrospira;D_6__Nitrospira japonica
82e5f2ea40cdceeab4da2df5a57982d4	4	10	1	4	5	2	0	1	0	0	0	0	0	0	0	0	0	0	0	0	0	0	0	0	0	0	0	0	0	0	0	0	3	1	0	0	D_0__Bacteria;D_1__Acidobacteria;D_2__Acidobacteriia;D_3__Acidobacteriales
2ec5d0bffe2a491cee101945b240589f	0	2	0	0	0	0	0	0	0	0	0	0	0	0	0	0	0	0	0	0	0	0	0	0	0	0	0	0	0	0	0	0	0	0	1	0	D_0__Bacteria;D_1__Chloroflexi
1e0df8e7bc716d3015e17a98452b1d32	1	0	1	0	0	0	0	0	0	0	0	0	0	0	0	0	0	0	0	0	0	0	0	0	0	0	6	0	0	0	2	1	0	0	2	2	D_0__Bacteria;D_1__Proteobacteria;D_2__Gammaproteobacteria;D_3__Xanthomonadales;D_4__Xanthomonadaceae;D_5__Arenimonas
debad8f36bdcea52118e43d2814c1e62	2	0	1	0	5	0	0	1	2	3	1	0	0	0	3	0	0	0	0	0	0	2	0	0	2	0	0	0	0	0	0	3	0	0	0	14	D_0__Bacteria;D_1__Proteobacteria;D_2__Alphaproteobacteria;D_3__Sphingomonadales;D_4__Sphingomonadaceae;D_5__Novosphingobium
03810c45cb36b1ab8711150049c9e195	1	0	3	0	0	0	0	0	4	0	1	0	0	1	0	0	2	0	0	0	0	1	0	0	0	0	0	0	0	0	0	0	0	0	0	1	D_0__Bacteria;D_1__Proteobacteria;D_2__Deltaproteobacteria;D_3__Myxococcales;D_4__Haliangiaceae;D_5__Haliangium;D_6__myxobacterium AT3-03
15689228385b4941a0da27125cb19fef	0	0	1	0	0	0	0	1	0	2	0	0	0	0	0	0	0	1	0	0	0	1	0	0	0	0	0	0	4	0	1	0	0	0	2	0	D_0__Bacteria;D_1__Latescibacteria
0de6396bed775e6f44d26346806c089b	0	1	1	1	0	0	4	1	2	0	0	0	0	1	0	0	0	2	0	0	0	0	3	2	0	2	2	0	3	3	1	2	2	0	0	0	D_0__Bacteria;D_1__Proteobacteria;D_2__Gammaproteobacteria;D_3__Betaproteobacteriales;D_4__A21b
d00848b641fc4dd5390324a6b820caa7	0	2	0	0	0	1	0	0	1	0	0	0	0	0	0	0	0	1	0	1	0	0	0	0	0	1	5	0	0	0	0	0	0	0	0	0	D_0__Bacteria;D_1__Acidobacteria;D_2__Blastocatellia (Subgroup 4);D_3__Blastocatellales;D_4__Blastocatellaceae
b81b8f391c17e2828757c657d31d490e	1	0	0	0	0	0	0	0	0	0	0	0	0	0	0	0	0	0	0	0	3	0	0	0	0	0	0	0	1	0	0	0	0	0	0	0	D_0__Bacteria;D_1__Acidobacteria;D_2__Subgroup 11
8586626ee11b05dedb444f3b4e80d2ad	0	0	0	0	0	0	0	0	0	0	0	0	5	5	6	0	1	1	1	0	2	1	1	2	4	1	1	3	0	2	0	0	0	0	0	0	D_0__Bacteria;D_1__Bacteroidetes;D_2__Bacteroidia;D_3__Chitinophagales;D_4__Chitinophagaceae
309e32680cea557f3e33a41a9445a31a	0	1	4	2	0	2	0	0	0	1	0	5	0	0	0	0	0	0	0	1	0	2	0	0	0	0	0	0	1	1	1	0	3	2	0	2	D_0__Bacteria;D_1__Proteobacteria;D_2__Gammaproteobacteria
369214202ec9db241020ac7ba4cbd5d8	0	1	0	1	2	0	0	0	0	0	0	1	1	0	0	0	0	0	0	0	0	0	0	0	0	0	0	0	0	0	0	0	1	0	0	0	D_0__Bacteria;D_1__Proteobacteria;D_2__Alphaproteobacteria;D_3__Rhizobiales;D_4__Rhizobiales Incertae Sedis;D_5__uncultured;D_6__uncultured Rhizobiales bacterium
f5d4163708e55f8047db6cdd64632916	2	0	1	0	0	0	0	0	0	0	0	0	0	0	0	0	2	0	0	0	0	0	0	0	3	0	0	0	0	0	1	0	0	0	0	0	D_0__Bacteria;D_1__Bacteroidetes;D_2__Bacteroidia;D_3__Sphingobacteriales;D_4__Sphingobacteriaceae;D_5__Mucilaginibacter
a87df26fd06e8a82266c9e399fd3cdd5	1	0	1	0	0	0	0	0	0	0	0	0	0	0	0	1	0	0	0	0	0	1	0	0	0	1	1	0	0	0	0	0	0	0	0	0	D_0__Bacteria;D_1__Proteobacteria;D_2__Alphaproteobacteria;D_3__Rhodospirillales;D_4__Rhodospirillaceae;D_5__uncultured;D_6__uncultured soil bacterium
a7d817a2d33b208422cd80b024b26e55	0	1	0	0	0	0	0	0	0	0	0	0	0	0	0	0	0	0	0	0	0	0	0	0	0	0	0	2	0	0	0	0	2	1	0	2	D_0__Bacteria;D_1__Proteobacteria;D_2__Alphaproteobacteria;D_3__Rhizobiales;D_4__Rhizobiales Incertae Sedis;D_5__Bauldia;D_6__uncultured Phyllobacteriaceae bacterium
2335fccf1ce82bc1e343eebd0a6de387	1	3	0	1	1	0	0	1	0	0	0	2	4	3	0	0	0	0	0	0	2	6	3	0	0	8	6	2	2	2	2	1	0	0	1	0	D_0__Bacteria;D_1__Acidobacteria;D_2__Subgroup 6;D_3__Acidobacteria bacterium SCN 69-37;D_4__Acidobacteria bacterium SCN 69-37;D_5__Acidobacteria bacterium SCN 69-37;D_6__Acidobacteria bacterium SCN 69-37
186aa7b5ddc1d54a112b173c128cdd04	0	0	0	0	0	0	0	0	2	0	0	0	0	1	0	0	0	0	0	0	0	0	0	0	0	1	0	0	0	0	0	0	0	0	0	0	D_0__Bacteria;D_1__Gemmatimonadetes;D_2__Gemmatimonadetes;D_3__Gemmatimonadales;D_4__Gemmatimonadaceae;D_5__Gemmatimonas
178544e6dbea20cda519b08e357387ac	0	0	0	0	0	0	2	0	0	0	0	0	0	0	0	0	0	0	0	0	0	0	0	0	3	0	0	0	0	0	0	3	0	0	0	0	D_0__Bacteria;D_1__Proteobacteria;D_2__Deltaproteobacteria;D_3__Bdellovibrionales;D_4__Bdellovibrionaceae;D_5__Bdellovibrio
7399bd47d6073ab28ed5b486f4287bd5	0	0	0	0	0	1	0	1	4	0	0	1	3	0	1	0	0	0	2	4	0	1	0	2	1	1	3	3	0	0	1	1	0	0	1	0	D_0__Bacteria;D_1__Proteobacteria;D_2__Gammaproteobacteria;D_3__R7C24;D_4__uncultured soil bacterium;D_5__uncultured soil bacterium;D_6__uncultured soil bacterium
c2bde6c7520c07194411fc6c82aa19a6	1	0	0	0	0	0	0	0	0	0	0	0	1	0	0	0	0	0	0	0	0	1	0	0	0	0	0	2	1	0	0	0	0	0	0	0	D_0__Bacteria;D_1__Acidobacteria;D_2__Acidobacteriia;D_3__Solibacterales;D_4__Solibacteraceae (Subgroup 3);D_5__Bryobacter;D_6__Acidobacteriaceae bacterium KBS 96
506e47347ffd0f0f35229db0063a5f15	2	0	0	0	0	0	0	0	0	0	0	1	0	0	0	0	0	0	1	0	0	0	0	0	0	0	0	0	0	0	0	0	0	0	0	0	D_0__Bacteria;D_1__Patescibacteria;D_2__Saccharimonadia;D_3__Saccharimonadales
741a5feb0bf8f8f1cceb1dfe5cc820ae	0	0	0	0	0	0	0	0	0	0	0	0	0	2	0	2	0	0	0	0	0	0	4	0	0	0	0	0	0	0	0	0	0	0	0	0	D_0__Bacteria;D_1__Proteobacteria;D_2__Gammaproteobacteria;D_3__Betaproteobacteriales;D_4__Burkholderiaceae
57be893cd62392936b0b23d16960f786	0	2	0	0	0	0	0	0	0	0	2	1	1	0	0	6	0	0	0	0	0	0	0	0	2	2	0	0	0	0	2	0	0	0	0	0	D_0__Bacteria;D_1__Chloroflexi;D_2__Ktedonobacteria;D_3__Ktedonobacterales;D_4__JG30-KF-AS9;D_5__uncultured bacterium;D_6__uncultured bacterium
24eee9c549634c6190e88baa516fb160	0	1	1	0	0	0	0	0	0	1	0	0	0	0	4	1	0	0	0	0	1	0	0	0	0	0	2	0	0	0	5	1	0	3	1	0	D_0__Bacteria;D_1__Firmicutes;D_2__Bacilli;D_3__Lactobacillales;D_4__Streptococcaceae;D_5__Streptococcus
7f38970e6f29b8443264c4394d3a40a0	0	0	2	1	0	0	0	0	0	0	0	2	0	0	0	0	2	0	0	0	0	0	0	0	0	0	0	0	0	2	0	1	0	0	0	0	D_0__Bacteria;D_1__Verrucomicrobia;D_2__Verrucomicrobiae;D_3__Chthoniobacterales;D_4__Chthoniobacteraceae;D_5__Candidatus Udaeobacter
7217a01dee93c31ad190e21eb8ac5075	1	3	2	0	1	0	1	1	0	0	1	1	4	4	3	3	2	9	7	2	1	6	4	3	6	13	4	5	5	9	2	0	1	5	0	1	D_0__Bacteria;D_1__Actinobacteria;D_2__Actinobacteria;D_3__Micromonosporales;D_4__Micromonosporaceae;D_5__Hamadaea
895cd3594ba178ee5fdde1021dc5f3a4	0	0	0	0	0	1	0	1	1	0	2	1	0	0	0	0	0	2	2	1	0	0	0	0	0	0	0	0	0	0	0	1	0	0	0	0	D_0__Bacteria;D_1__Actinobacteria;D_2__Actinobacteria;D_3__Frankiales;D_4__uncultured;D_5__uncultured Sporichthyaceae bacterium;D_6__uncultured Sporichthyaceae bacterium
03b8ebd32675ff7204def30e99648ba9	1	0	0	0	0	0	0	0	2	0	0	0	0	0	0	0	0	0	2	1	0	0	0	0	0	0	0	2	0	3	0	0	1	0	0	0	D_0__Bacteria;D_1__Actinobacteria;D_2__Thermoleophilia;D_3__Gaiellales;D_4__uncultured
0b82a23db223fc2a7b153d1ae008b305	0	0	3	0	0	0	0	0	0	0	0	0	0	0	0	0	0	0	0	0	0	1	0	0	0	0	0	0	0	0	2	0	0	0	0	2	D_0__Bacteria;D_1__Patescibacteria;D_2__Saccharimonadia;D_3__Saccharimonadales;D_4__metal-contaminated soil clone K20-27;D_5__metal-contaminated soil clone K20-27;D_6__metal-contaminated soil clone K20-27
7f0fd7498b4eee6fff071bdc93e68128	2	0	2	2	0	1	0	0	0	0	0	0	0	0	0	0	0	0	0	0	0	0	0	0	0	2	0	0	0	0	1	0	0	0	0	0	D_0__Bacteria;D_1__Chloroflexi;D_2__Dehalococcoidia;D_3__S085
2e59a523ebbcd729a5e141a0a30edf20	0	0	1	4	0	0	0	0	0	0	0	0	0	0	0	0	0	0	0	0	0	0	0	0	0	0	0	0	5	0	0	0	0	0	2	0	D_0__Bacteria;D_1__Bacteroidetes;D_2__Bacteroidia;D_3__Cytophagales;D_4__Microscillaceae
dea5b7ec18d1305494ab02efd91b86dd	0	0	0	0	0	0	0	0	0	0	0	0	0	0	1	0	0	0	0	0	0	0	0	0	2	29	2	4	0	1	0	0	0	0	0	0	D_0__Bacteria;D_1__Proteobacteria;D_2__Gammaproteobacteria;D_3__Pseudomonadales;D_4__Pseudomonadaceae;D_5__Pseudomonas
e22a713f5ccac44a2bbbff5040eabe19	0	0	4	0	0	0	0	0	0	0	0	0	0	0	0	0	0	0	0	0	0	0	0	0	0	0	0	0	2	0	2	1	0	0	1	0	D_0__Bacteria;D_1__Proteobacteria;D_2__Gammaproteobacteria;D_3__Xanthomonadales;D_4__Xanthomonadaceae;D_5__Arenimonas;D_6__Arenimonas maotaiensis
827d1f017ff58d50701fed7667a87ccc	0	0	0	0	0	0	0	0	2	0	0	2	0	0	0	0	0	0	0	0	0	0	0	0	0	0	1	0	0	0	0	0	1	0	0	0	D_0__Bacteria;D_1__Proteobacteria;D_2__Alphaproteobacteria;D_3__Elsterales;D_4__uncultured
cab228b763a5be26cc28296e04c96e5a	0	0	0	1	0	0	0	0	0	0	0	0	0	0	1	0	0	0	0	0	0	0	0	2	0	0	2	3	0	0	0	2	0	0	1	0	D_0__Bacteria;D_1__Bacteroidetes;D_2__Bacteroidia;D_3__Chitinophagales;D_4__Chitinophagaceae;D_5__Niastella;D_6__Niastella yeongjuensis
13ff8daab6d896e11c23d3dd8e551a82	5	1	13	2	6	9	0	0	0	1	2	0	0	7	5	0	3	11	2	3	3	0	4	0	3	11	0	0	4	2	5	2	0	1	3	0	D_0__Bacteria;D_1__Gemmatimonadetes;D_2__Gemmatimonadetes;D_3__Gemmatimonadales;D_4__Gemmatimonadaceae;D_5__uncultured;D_6__Gemmatimonadetes bacterium LP81
b5945ccde9df029621be6479d5ab684d	0	0	0	0	0	0	0	0	0	0	0	1	0	0	0	0	0	0	0	0	0	0	0	0	0	0	0	0	0	0	0	0	0	0	0	2	D_0__Bacteria;D_1__Proteobacteria;D_2__Alphaproteobacteria;D_3__Acetobacterales;D_4__Acetobacteraceae;D_5__uncultured;D_6__uncultured eubacterium WD2105
9d08f7d6810325bf25f976d8345d2925	0	0	0	0	1	0	0	0	0	1	0	2	0	0	0	0	0	0	0	0	0	0	0	0	0	0	0	0	0	0	0	0	0	0	0	0	D_0__Bacteria;D_1__Proteobacteria;D_2__Deltaproteobacteria;D_3__Myxococcales;D_4__Haliangiaceae;D_5__Haliangium;D_6__Myxococcales bacterium LWH177
d79a556781506e9ca764299609835d54	0	0	0	0	0	0	0	0	0	0	0	0	0	0	0	0	0	0	1	2	0	0	0	0	0	1	0	1	1	0	0	0	0	0	0	0	D_0__Bacteria;D_1__Gemmatimonadetes;D_2__Gemmatimonadetes;D_3__Gemmatimonadales;D_4__Gemmatimonadaceae;D_5__Gemmatimonas
1543e0c7ac438c522b6283db229d7e2b	14	8	7	1	5	15	6	4	7	3	8	11	2	7	6	5	10	5	6	0	8	14	0	9	3	8	5	2	15	1	5	4	1	5	2	1	D_0__Bacteria;D_1__Bacteroidetes;D_2__Bacteroidia;D_3__Chitinophagales;D_4__Chitinophagaceae
f29eba1d0d7dd7742e31936fa1a2a99d	0	1	0	0	0	0	0	0	0	0	1	0	0	0	0	0	0	0	0	0	0	0	0	0	0	0	0	0	0	0	0	0	0	0	0	0	D_0__Bacteria;D_1__Proteobacteria;D_2__Gammaproteobacteria;D_3__Pseudomonadales;D_4__Pseudomonadaceae;D_5__Pseudomonas
f8f06a8a39edf05ac71aa8908e677faf	0	1	0	0	0	0	0	0	0	0	0	0	0	0	2	0	0	0	0	0	0	0	1	0	1	0	1	0	0	0	1	1	0	0	1	2	D_0__Bacteria;D_1__Gemmatimonadetes;D_2__Gemmatimonadetes;D_3__Gemmatimonadales;D_4__Gemmatimonadaceae;D_5__uncultured
72805ec47ed3ed1938149f4a7908e067	0	0	0	0	0	0	0	0	0	0	0	0	2	0	0	0	2	0	0	7	0	0	0	0	0	0	0	2	1	0	0	0	0	0	1	2	D_0__Bacteria;D_1__Acidobacteria;D_2__Subgroup 18
c47e460092bee2e4e23365cccdd68777	0	0	0	0	1	0	0	0	0	0	2	0	0	2	4	3	3	1	0	2	0	0	0	0	2	0	0	0	1	3	0	0	0	0	0	0	D_0__Bacteria;D_1__Proteobacteria;D_2__Deltaproteobacteria;D_3__Myxococcales;D_4__Polyangiaceae;D_5__Pajaroellobacter;D_6__soil metagenome
df9217841a3834bd8141a43a0aa1f066	0	2	1	0	2	0	2	0	0	0	2	4	0	0	0	0	0	1	0	0	0	0	0	0	0	0	0	0	0	0	0	0	3	3	1	1	D_0__Bacteria;D_1__Actinobacteria;D_2__Actinobacteria;D_3__Streptosporangiales;D_4__Streptosporangiaceae;D_5__Streptosporangium
ed48eae371148d4b61daf79344de40ba	1	1	0	1	1	1	0	0	1	1	2	0	0	5	0	1	4	3	0	0	0	3	0	5	1	1	1	6	3	2	1	0	0	0	0	2	D_0__Bacteria;D_1__Bacteroidetes;D_2__Bacteroidia;D_3__Chitinophagales;D_4__Chitinophagaceae
aaa2dcda85b4234a884a3463f410d703	0	0	2	0	1	0	2	0	0	1	0	0	0	0	0	0	0	0	0	0	0	0	0	0	0	1	0	0	0	0	0	0	0	0	0	0	D_0__Bacteria;D_1__Proteobacteria;D_2__Gammaproteobacteria;D_3__Gammaproteobacteria Incertae Sedis;D_4__Unknown Family;D_5__Acidibacter;D_6__Punica granatum (pomegranate)
c86a75ccd5a98db93902f97d4d4a1638	0	2	0	0	0	0	0	0	1	0	0	0	0	0	0	0	0	0	0	0	0	0	0	0	0	0	0	0	0	0	0	0	0	0	0	0	D_0__Bacteria;D_1__Bacteroidetes;D_2__Bacteroidia
7c705f184acd6ccaa75f2196377ced3a	0	0	0	0	0	0	2	0	0	0	0	0	0	0	2	0	0	0	0	0	0	0	0	0	0	0	0	0	0	0	4	0	0	0	0	0	D_0__Bacteria;D_1__Firmicutes;D_2__Bacilli;D_3__Lactobacillales;D_4__Lactobacillaceae;D_5__Lactobacillus
145a8c5d891c031353ebc23ab44b5d1c	7	0	3	4	2	4	6	2	3	0	1	3	1	8	2	1	4	0	3	0	1	2	2	4	3	4	6	0	3	1	5	5	8	4	5	6	D_0__Bacteria;D_1__Proteobacteria;D_2__Gammaproteobacteria;D_3__Betaproteobacteriales;D_4__SC-I-84
926181eef8291a3cca2f16d3b3b9a2eb	0	4	7	1	1	4	0	2	0	2	5	2	0	0	0	0	2	2	0	0	3	0	0	0	0	0	1	0	0	0	1	1	3	0	8	1	D_0__Bacteria;D_1__Proteobacteria;D_2__Gammaproteobacteria;D_3__Betaproteobacteriales;D_4__Burkholderiaceae
d2d48fbe92312facbe5e799a8037b2dc	2	1	3	2	1	0	0	4	4	3	5	0	4	2	0	1	2	2	2	1	0	6	2	5	1	3	6	2	0	1	2	0	4	3	2	1	D_0__Bacteria;D_1__Proteobacteria;D_2__Gammaproteobacteria;D_3__Gammaproteobacteria Incertae Sedis;D_4__Unknown Family;D_5__Acidibacter;D_6__Punica granatum (pomegranate)
ae9b83c22b3ee8679c3e9207aeea79d6	0	4	0	0	0	0	0	1	1	2	0	0	0	3	0	0	0	0	0	5	0	0	0	0	2	0	2	0	1	0	0	0	0	0	1	0	D_0__Bacteria;D_1__Actinobacteria;D_2__Acidimicrobiia;D_3__IMCC26256
b4d3dcf168ee57e6fb32099d05819ef1	3	1	2	0	0	0	0	1	0	3	0	0	7	4	1	2	9	1	14	8	1	2	9	3	8	6	1	2	2	2	0	0	2	0	0	0	D_0__Bacteria;D_1__Proteobacteria;D_2__Alphaproteobacteria
9e0b5d500d8f5774c1c498ef107275ff	0	0	0	0	0	0	0	1	0	0	0	2	0	0	0	0	5	0	2	0	1	0	0	1	0	0	0	0	0	0	0	0	0	0	0	0	D_0__Bacteria;D_1__Bacteroidetes;D_2__Bacteroidia;D_3__Sphingobacteriales;D_4__env.OPS 17;D_5__uncultured Alistipes sp.;D_6__uncultured Alistipes sp.
4b7ef69db4cbee2e09eb6ed38d8745df	7	6	3	5	5	10	4	4	8	11	8	11	9	2	7	3	7	3	4	6	6	6	4	3	5	4	4	6	0	7	6	4	5	11	6	0	D_0__Bacteria;D_1__Acidobacteria;D_2__Subgroup 6
929860256de7233425894e319a0ed259	0	0	0	0	0	0	0	0	0	0	0	0	0	0	0	0	0	0	0	0	0	0	0	0	1	2	3	0	0	0	0	0	0	0	0	0	D_0__Bacteria;D_1__Patescibacteria;D_2__Saccharimonadia;D_3__Saccharimonadales
c7f26eaa11355968d1d47a1ded32b62f	0	0	2	2	0	1	3	0	0	0	0	0	0	0	0	0	0	0	0	0	0	0	0	0	0	0	0	0	0	0	1	0	0	0	0	0	D_0__Bacteria;D_1__Proteobacteria;D_2__Gammaproteobacteria;D_3__Xanthomonadales;D_4__Xanthomonadaceae;D_5__Lysobacter
a66c0273385b983c4bb2d12b2f33bd2c	0	0	0	0	0	3	0	0	0	0	4	0	0	0	0	0	0	1	0	0	0	0	0	0	0	0	0	0	0	0	0	0	0	0	0	0	D_0__Bacteria;D_1__Proteobacteria;D_2__Deltaproteobacteria;D_3__Myxococcales;D_4__Sandaracinaceae
1eb2b2e0ee41de0542aba90e5f037841	0	0	0	0	0	0	0	0	0	1	0	0	0	0	0	0	0	0	0	0	0	0	0	0	0	0	0	0	0	0	0	0	1	0	0	0	D_0__Bacteria;D_1__Chloroflexi;D_2__Chloroflexia;D_3__Thermomicrobiales;D_4__JG30-KF-CM45;D_5__uncultured anaerobic ammonium-oxidizing bacterium;D_6__uncultured anaerobic ammonium-oxidizing bacterium
15db81dbf4a1f86b602b5c5476adb2a6	0	0	1	0	4	3	0	4	7	0	0	0	0	0	4	0	0	0	1	5	2	0	0	10	0	3	1	0	0	4	0	2	1	2	1	3	D_0__Bacteria;D_1__Bacteroidetes;D_2__Bacteroidia;D_3__Chitinophagales;D_4__Chitinophagaceae;D_5__Niastella;D_6__Niastella yeongjuensis
eccf749088aa4196c0a7f594c9759ce1	1	0	0	1	0	1	2	0	1	1	0	0	3	1	4	0	0	0	0	0	0	3	1	1	0	1	2	3	2	2	0	1	0	1	0	0	D_0__Bacteria;D_1__Bacteroidetes;D_2__Bacteroidia;D_3__Chitinophagales;D_4__Chitinophagaceae;D_5__Flavitalea
37391b209339d4670ff6f79a5789bfc2	0	0	0	0	0	0	0	0	0	0	0	0	0	0	0	0	0	0	0	0	0	0	0	0	0	0	0	2	0	1	0	0	0	0	2	2	D_0__Bacteria;D_1__Actinobacteria;D_2__Actinobacteria;D_3__Propionibacteriales;D_4__Nocardioidaceae;D_5__Nocardioides
585663efb79f37aec20f25db6ced9b60	2	0	0	1	1	0	0	0	1	0	1	0	0	1	0	0	0	0	0	0	0	0	0	0	0	0	0	0	0	0	0	0	1	0	0	0	D_0__Bacteria;D_1__Proteobacteria;D_2__Alphaproteobacteria;D_3__Reyranellales;D_4__Reyranellaceae;D_5__Reyranella
c665de54c39c356d37bf076bfb178f48	0	0	0	3	0	0	0	2	2	0	0	3	0	3	0	0	0	0	0	0	0	0	0	0	2	0	2	0	0	4	0	2	0	4	0	1	D_0__Bacteria;D_1__Bacteroidetes;D_2__Ignavibacteria;D_3__OPB56;D_4__uncultured bacterium KF-JG30-B11;D_5__uncultured bacterium KF-JG30-B11;D_6__uncultured bacterium KF-JG30-B11
7a0c72f54526b10219def32f148419e0	0	0	0	1	2	0	0	1	0	0	0	0	1	2	0	3	0	3	0	0	1	0	0	1	0	3	0	2	0	0	0	0	0	0	0	0	D_0__Bacteria;D_1__Proteobacteria;D_2__Gammaproteobacteria;D_3__Cellvibrionales;D_4__Halieaceae;D_5__OM60(NOR5) clade
0b5105c1251c198f5e7ccb7122a189f9	0	1	0	0	3	0	0	0	0	0	0	0	5	0	0	2	0	0	0	0	2	1	0	1	0	0	1	1	3	0	0	0	1	0	0	0	D_0__Bacteria;D_1__Proteobacteria;D_2__Alphaproteobacteria;D_3__Acetobacterales;D_4__Acetobacteraceae;D_5__uncultured;D_6__uncultured eubacterium WD2105
43bbfb70925f8e771742f662cdf08313	0	0	0	0	1	0	0	0	0	0	0	0	0	1	0	2	3	0	0	0	0	0	0	0	3	1	0	0	0	0	0	0	0	0	0	0	D_0__Bacteria;D_1__Bacteroidetes;D_2__Bacteroidia;D_3__Sphingobacteriales;D_4__Sphingobacteriaceae;D_5__Pedobacter
4c51ae19b0b6767fb37a9727d26e9e9a	0	0	0	0	0	0	0	1	0	0	0	0	0	0	0	0	0	0	2	0	0	0	0	0	1	0	0	0	0	0	0	0	0	0	0	0	D_0__Bacteria;D_1__Proteobacteria;D_2__Alphaproteobacteria;D_3__Rhodospirillales;D_4__uncultured;D_5__uncultured Rhodospirillaceae bacterium;D_6__uncultured Rhodospirillaceae bacterium
fd45d797fdaee2ef5c84a1a39b2ee897	0	5	0	0	1	0	0	0	0	0	3	0	0	5	3	0	0	0	0	10	0	0	1	0	0	0	3	5	1	1	0	0	0	0	6	0	D_0__Bacteria;D_1__Bacteroidetes;D_2__Bacteroidia;D_3__Chitinophagales;D_4__Chitinophagaceae;D_5__Terrimonas
4cd374388afc7149c10edf9ed6cdf61f	3	0	3	2	5	1	4	4	10	6	0	4	1	2	4	3	3	1	0	1	3	5	0	2	2	1	2	3	1	0	0	2	3	0	0	0	D_0__Bacteria;D_1__Proteobacteria;D_2__Alphaproteobacteria;D_3__Acetobacterales;D_4__Acetobacteraceae;D_5__Acidicaldus;D_6__uncultured Acidisphaera sp.
2062a222210122f01cef5e1905dee25e	0	0	0	0	0	0	0	0	0	0	0	0	0	0	3	0	0	0	0	0	0	0	0	0	3	0	0	0	0	2	0	0	0	0	0	0	D_0__Bacteria;D_1__Proteobacteria;D_2__Gammaproteobacteria;D_3__Cellvibrionales;D_4__Cellvibrionaceae;D_5__Cellvibrio
d79f2b02a93c8a64d1eec0c137478a89	1	1	1	0	0	0	2	0	2	2	3	1	0	0	0	0	0	0	0	0	0	0	0	0	0	0	0	2	0	0	1	0	2	6	2	6	D_0__Bacteria;D_1__Proteobacteria;D_2__Gammaproteobacteria;D_3__Betaproteobacteriales;D_4__SC-I-84
f07098f486ddd3b642450f0dcf64c4aa	2	2	2	0	0	0	0	1	2	0	0	0	0	0	0	0	0	4	0	0	2	0	0	3	2	3	0	0	1	2	0	1	0	0	0	0	D_0__Bacteria;D_1__Proteobacteria;D_2__Alphaproteobacteria;D_3__Rickettsiales;D_4__SM2D12;D_5__uncultured Bradyrhizobium sp.;D_6__uncultured Bradyrhizobium sp.
066e2739b80dcce75eb403e32f7a3706	7	10	4	5	4	3	3	7	9	5	4	2	4	2	4	4	5	1	1	0	0	7	4	0	2	1	2	4	1	2	1	5	0	8	6	1	D_0__Bacteria;D_1__Proteobacteria;D_2__Alphaproteobacteria;D_3__Micropepsales;D_4__Micropepsaceae;D_5__Micropepsis;D_6__metagenome
ce5a9e9c549dcac6e5358ddb151f8216	4	0	1	0	0	0	0	0	0	0	0	0	0	0	3	0	0	6	1	0	0	0	0	29	7	2	4	2	4	1	0	0	0	0	0	4	D_0__Bacteria;D_1__Proteobacteria;D_2__Gammaproteobacteria;D_3__Pseudomonadales;D_4__Pseudomonadaceae;D_5__Pseudomonas
f2b1dd3b39d1a4739cacd00da120a5aa	0	2	0	0	2	0	0	0	0	0	0	0	0	0	0	0	0	0	0	0	0	0	0	0	0	0	0	0	0	0	0	0	0	0	0	0	D_0__Bacteria;D_1__Gemmatimonadetes;D_2__Gemmatimonadetes;D_3__Gemmatimonadales;D_4__Gemmatimonadaceae;D_5__uncultured
c1f2b7e1c6dd3339860a476ca8f5e566	1	7	0	1	2	1	0	0	6	1	1	2	4	2	3	11	7	2	0	1	2	1	0	2	3	0	0	0	2	4	0	0	0	0	0	0	D_0__Bacteria;D_1__Acidobacteria;D_2__Acidobacteriia;D_3__Subgroup 13;D_4__uncultured bacterium KF-JG30-18;D_5__uncultured bacterium KF-JG30-18;D_6__uncultured bacterium KF-JG30-18
164a0aff97c323d9d357437cb88ba834	0	1	1	0	0	0	2	0	0	0	2	1	0	0	0	1	0	0	0	0	0	0	0	0	0	1	1	0	1	0	2	0	0	0	4	1	D_0__Bacteria;D_1__Proteobacteria;D_2__Gammaproteobacteria;D_3__Betaproteobacteriales;D_4__Nitrosomonadaceae;D_5__Nitrosospira
7eeb4afc703aebee511630a3415bca69	0	0	5	0	0	0	1	0	0	0	0	0	0	1	0	0	0	0	0	0	2	0	0	0	0	0	0	0	0	0	0	0	1	0	0	0	D_0__Bacteria;D_1__Bacteroidetes;D_2__Bacteroidia;D_3__Chitinophagales;D_4__Chitinophagaceae
110631c365e882886ee5fa039e3c7f05	0	2	0	1	0	0	0	0	0	0	0	0	0	0	0	0	0	0	0	0	0	0	0	0	0	0	0	0	0	0	0	0	0	0	0	0	D_0__Bacteria;D_1__Chloroflexi;D_2__P2-11E;D_3__uncultured Chloroflexi bacterium;D_4__uncultured Chloroflexi bacterium;D_5__uncultured Chloroflexi bacterium;D_6__uncultured Chloroflexi bacterium
6f89af3250b053653d751ad5c1f91e79	0	0	0	0	0	0	0	0	0	0	0	0	0	2	0	3	0	3	0	0	5	1	2	1	0	0	2	0	2	0	0	0	0	0	0	0	D_0__Bacteria;D_1__Bacteroidetes;D_2__Bacteroidia;D_3__Chitinophagales;D_4__Chitinophagaceae;D_5__uncultured;D_6__Chitinophaga sp. BN130233
d7445adce6a93cbf258642d001d455a6	0	0	0	2	0	0	0	0	0	0	0	0	0	0	0	0	0	1	0	0	0	0	0	0	0	0	2	0	0	0	0	0	1	0	0	0	D_0__Bacteria;D_1__Firmicutes;D_2__Clostridia;D_3__Clostridiales;D_4__Lachnospiraceae
433b4c18333ea290ea132bb1ca5057bc	0	0	0	0	0	3	0	0	0	0	0	0	0	0	0	0	0	0	1	1	0	0	0	2	2	0	0	2	0	1	0	0	2	0	1	6	D_0__Bacteria;D_1__Proteobacteria;D_2__Deltaproteobacteria;D_3__Myxococcales;D_4__Sandaracinaceae
eaf447a37318fbde6ac3f5e857a53c62	0	0	0	0	0	0	0	0	0	0	0	0	2	0	0	0	0	0	0	0	0	0	0	0	1	0	0	0	0	0	0	0	0	0	0	0	D_0__Bacteria;D_1__Bacteroidetes;D_2__Bacteroidia
17bbd851610cc5483c0390506815079a	0	0	0	0	0	0	0	0	1	0	0	0	0	3	0	0	0	0	0	2	0	0	0	0	0	0	0	0	0	0	0	0	0	0	0	0	D_0__Bacteria;D_1__Acidobacteria;D_2__Acidobacteriia;D_3__Acidobacteriales
d01f8df8dda7dc142e7406e7a2495c03	0	0	0	0	0	0	0	0	0	0	0	0	0	0	0	1	0	0	0	0	0	0	0	0	1	0	0	0	1	0	0	0	0	0	0	0	D_0__Bacteria;D_1__Proteobacteria;D_2__Alphaproteobacteria;D_3__Rhodospirillales;D_4__Rhodopirillaceae;D_5__Defluviicoccus;D_6__uncultured Acetobacteraceae bacterium
cc5bc566ae80c515c1bbbb576e0f9488	0	1	0	0	0	0	0	0	0	0	2	0	0	0	0	0	0	0	0	0	0	0	0	0	0	0	0	0	0	0	0	1	0	2	0	0	D_0__Bacteria;D_1__Chloroflexi
1b5f664eb1884c5dd595b82701652ad7	0	0	0	0	0	0	0	3	0	0	0	1	0	0	0	0	0	0	0	0	0	0	1	0	0	0	0	0	0	0	0	0	1	1	0	0	D_0__Bacteria;D_1__Actinobacteria;D_2__Actinobacteria;D_3__Corynebacteriales;D_4__Mycobacteriaceae;D_5__Mycobacterium
1bb01e75f2efb08cb238db2f4647f3a9	0	0	0	0	0	0	0	0	0	0	0	0	0	0	0	0	0	0	0	0	2	1	0	0	0	0	0	0	0	0	0	0	0	0	0	0	D_0__Bacteria;D_1__Chloroflexi;D_2__Dehalococcoidia;D_3__S085;D_4__uncultured soil bacterium;D_5__uncultured soil bacterium;D_6__uncultured soil bacterium
629a15e6f9869e8db5f3c9840ed2c875	0	1	3	0	1	0	2	0	0	0	0	0	0	0	0	0	3	0	0	1	2	0	0	0	0	2	0	0	7	0	0	0	0	0	0	0	D_0__Bacteria;D_1__Chloroflexi;D_2__KD4-96
3c30b46344f35dfb3d96683941a1a1e8	7	3	2	4	0	1	12	0	4	0	3	1	9	9	9	14	5	1	2	7	4	1	0	4	7	2	1	3	5	6	0	0	4	0	0	0	D_0__Bacteria;D_1__Acidobacteria;D_2__Acidobacteriia;D_3__Solibacterales;D_4__Solibacteraceae (Subgroup 3);D_5__Bryobacter;D_6__uncultured Holophaga sp.
d06074ec24fc217951490d93b85bad82	1	0	0	1	1	0	0	0	0	0	0	0	0	0	1	0	0	0	0	0	1	0	0	0	0	0	0	0	0	0	1	0	0	0	1	0	D_0__Bacteria;D_1__Proteobacteria;D_2__Alphaproteobacteria;D_3__Sphingomonadales;D_4__Sphingomonadaceae;D_5__Sphingomonas
9c47f0aa364e22822a8c041ee171316f	0	2	0	0	0	9	1	0	0	0	0	0	0	0	0	2	0	0	0	0	0	1	0	0	0	1	2	0	0	2	4	0	1	2	0	0	D_0__Bacteria;D_1__Acidobacteria;D_2__Acidobacteriia;D_3__Solibacterales;D_4__Solibacteraceae (Subgroup 3);D_5__Candidatus Solibacter;D_6__uncultured Acidobacteriaceae bacterium
4fedec6c49986ef7cdaeb7b156290ec8	0	1	0	0	1	0	0	0	0	0	0	0	0	0	0	0	0	0	0	0	0	0	0	0	0	0	0	0	1	0	0	0	0	0	0	0	D_0__Bacteria;D_1__Proteobacteria;D_2__Gammaproteobacteria;D_3__Betaproteobacteriales;D_4__Nitrosomonadaceae;D_5__Ellin6067
fd1ed0f481d164bebfd6a9d6a19a84ef	0	2	0	1	1	2	0	0	0	2	0	3	0	0	0	0	0	1	3	0	0	5	0	0	0	0	0	0	0	0	5	0	5	2	2	0	D_0__Bacteria;D_1__Proteobacteria;D_2__Alphaproteobacteria;D_3__Rhizobiales;D_4__Xanthobacteraceae;D_5__uncultured
04bf5e845c2be31b98fbfc65d1f3edb6	2	0	3	0	6	0	2	2	0	1	4	2	0	2	0	0	4	0	0	4	0	2	0	11	11	2	0	0	3	0	2	4	6	4	0	1	D_0__Bacteria;D_1__Firmicutes;D_2__Bacilli;D_3__Bacillales;D_4__Paenibacillaceae;D_5__Paenibacillus
da35ceea81f777ef70b0645731049c9f	0	3	0	4	0	0	0	3	2	2	0	0	3	0	0	0	0	0	4	2	1	4	2	0	2	0	4	0	3	0	1	0	0	4	2	1	D_0__Bacteria;D_1__Acidobacteria;D_2__Subgroup 17
1842f487a8dda083a9ef5a7b12fca685	0	0	0	0	0	0	0	2	4	0	0	0	0	0	0	0	0	0	0	0	0	0	0	0	0	0	0	0	0	2	0	0	0	2	0	2	D_0__Bacteria;D_1__Acidobacteria;D_2__Subgroup 6
2306892355229de77d04f19e90608435	10	16	0	6	9	4	13	1	15	6	6	5	11	6	1	6	7	1	3	6	4	6	13	5	11	3	4	4	7	5	6	3	2	8	6	5	D_0__Bacteria;D_1__Proteobacteria;D_2__Gammaproteobacteria;D_3__KF-JG30-C25;D_4__uncultured soil bacterium;D_5__uncultured soil bacterium;D_6__uncultured soil bacterium
1def6ad7c02ca5354e16caa54f08e22d	0	0	0	0	2	0	0	0	0	3	0	0	0	0	0	0	0	0	0	0	0	0	0	0	0	1	3	0	0	0	1	2	0	0	0	0	D_0__Bacteria
cfe8d6985099d1293fec90efd2fd0ff0	0	0	0	1	0	0	0	0	0	0	0	0	0	0	0	0	0	0	0	0	0	0	0	0	0	0	0	0	0	0	0	0	0	0	0	0	D_0__Bacteria;D_1__Rokubacteria;D_2__NC10;D_3__Rokubacteriales;D_4__uncultured soil bacterium;D_5__uncultured soil bacterium;D_6__uncultured soil bacterium
09aa0b859dabf31e2ec144488c23c48d	0	0	3	0	2	0	0	0	0	0	2	0	0	1	3	2	0	3	3	0	3	3	0	3	2	4	3	4	1	4	3	2	4	1	0	0	D_0__Bacteria;D_1__Actinobacteria;D_2__Acidimicrobiia;D_3__Microtrichales;D_4__Ilumatobacteraceae
885a955af89512c7de28a620cefdd867	0	0	0	0	0	0	0	0	0	0	0	0	0	0	0	0	0	0	0	0	0	0	0	0	0	0	0	0	0	0	37	1	0	3	2	0	D_0__Bacteria;D_1__Bacteroidetes;D_2__Bacteroidia;D_3__Flavobacteriales;D_4__Flavobacteriaceae;D_5__Flavobacterium
7a7afd82a2ddc354183e945f80dd96d1	1	0	0	0	5	0	2	1	0	0	0	0	0	0	0	0	0	0	0	0	0	0	0	0	0	0	0	0	0	0	1	0	0	0	2	0	D_0__Bacteria;D_1__Proteobacteria;D_2__Alphaproteobacteria;D_3__Rhizobiales;D_4__Kaistiaceae;D_5__Kaistia
b19e9c0ed17decedb17712c9a35c780f	0	0	0	0	0	0	0	0	2	0	0	3	1	2	1	0	6	2	2	0	1	0	0	1	2	0	0	2	0	7	0	0	1	2	0	0	D_0__Bacteria;D_1__Chloroflexi;D_2__Ktedonobacteria;D_3__Ktedonobacterales;D_4__JG30-KF-AS9
f33dd50828943f766626c7329801ea13	4	0	2	0	2	0	0	0	0	3	0	0	0	1	2	0	0	0	0	0	0	2	2	0	2	0	0	0	0	0	0	0	0	1	0	0	D_0__Bacteria;D_1__Patescibacteria;D_2__Saccharimonadia;D_3__Saccharimonadales;D_4__bacterium LWQ8;D_5__bacterium LWQ8;D_6__bacterium LWQ8
c760f9b626c98ef607035dc2fbe54672	3	0	16	0	0	5	2	3	2	0	0	0	0	0	0	0	0	0	0	0	0	0	0	0	0	0	0	0	0	0	2	0	2	0	0	0	D_0__Bacteria;D_1__Acidobacteria;D_2__Subgroup 6
91d1b24a7884c9c90f1a764061308381	1	0	0	1	0	0	1	0	0	0	0	0	0	0	0	0	0	0	0	0	0	0	0	0	0	0	0	0	2	0	0	0	1	0	0	0	D_0__Bacteria;D_1__Firmicutes;D_2__Bacilli;D_3__Bacillales;D_4__Bacillaceae;D_5__Bacillus
f6f2d0471943b0ec83ce97831b1794dd	0	0	0	0	0	0	0	0	0	0	0	0	0	0	0	0	0	0	0	0	0	0	0	0	0	0	0	0	0	0	0	5	0	0	1	0	D_0__Bacteria;D_1__Patescibacteria;D_2__Saccharimonadia;D_3__Saccharimonadales
a92a9a20d023a4621f62bcfcbdf465c3	3	3	1	0	0	0	2	0	1	0	0	0	1	0	0	0	2	0	0	8	0	2	0	2	0	0	1	0	0	0	2	2	4	2	2	0	D_0__Bacteria;D_1__Proteobacteria;D_2__Alphaproteobacteria;D_3__Caulobacterales;D_4__Hyphomonadaceae;D_5__SWB02;D_6__alpha proteobacterium U9-1i
c884edadca02e42b233d4826d643ae27	0	1	0	0	0	5	0	8	0	0	0	1	0	0	0	0	0	0	0	0	0	2	0	0	0	0	0	0	0	0	0	0	0	2	0	4	D_0__Bacteria;D_1__Actinobacteria;D_2__Actinobacteria;D_3__Micrococcales;D_4__Microbacteriaceae
8e53d02bd8f3c93fff3a06ec629ef982	0	0	0	0	0	0	0	0	0	0	0	0	0	0	0	0	0	0	0	0	0	0	0	0	0	0	0	0	0	0	1	0	0	0	0	4	D_0__Bacteria;D_1__Acidobacteria;D_2__Subgroup 6
25167f870b369fb1dbaad46c69c84025	1	0	1	0	0	0	0	0	0	0	0	2	0	0	0	0	0	0	0	0	0	1	0	0	0	0	0	0	0	0	0	0	0	0	0	0	D_0__Bacteria;D_1__Proteobacteria;D_2__Alphaproteobacteria;D_3__Sphingomonadales;D_4__Sphingomonadaceae;D_5__Sphingomonas
86d430d97e4afb10ad99e2729812358c	0	0	0	0	0	0	0	0	0	0	0	0	3	0	2	0	0	0	0	0	0	2	0	0	0	2	0	0	0	0	0	0	0	0	0	0	D_0__Bacteria;D_1__Proteobacteria;D_2__Alphaproteobacteria;D_3__Acetobacterales;D_4__Acetobacteraceae;D_5__uncultured
822393641a6016cd83ee510d21fd321b	0	0	0	0	1	2	0	0	0	0	2	0	0	2	0	0	2	0	0	0	0	0	0	0	0	0	0	0	0	1	1	0	0	0	0	0	D_0__Bacteria;D_1__Actinobacteria;D_2__Actinobacteria;D_3__Corynebacteriales;D_4__Nocardiaceae;D_5__Rhodococcus
1467e0f7327846f11ba60af20b40fef9	3	2	13	0	3	6	3	7	1	3	6	3	0	0	0	0	1	5	0	0	0	1	0	1	1	1	2	0	1	0	4	4	4	5	4	7	D_0__Bacteria;D_1__Proteobacteria;D_2__Gammaproteobacteria;D_3__Betaproteobacteriales
df55c86bce55caf05935cfebd6a221e1	0	0	0	0	0	0	0	0	0	0	0	0	0	0	1	0	0	0	0	0	0	0	2	0	0	1	0	0	2	0	0	0	0	0	0	0	D_0__Bacteria;D_1__Proteobacteria;D_2__Gammaproteobacteria;D_3__Betaproteobacteriales;D_4__SC-I-84
ad05ce00f2dcf2d0be2b2eb5deecbe1e	6	13	6	10	7	17	5	8	6	12	21	9	8	15	4	1	17	4	16	8	6	4	8	8	7	12	16	12	6	11	5	15	16	6	9	6	D_0__Bacteria;D_1__Actinobacteria;D_2__Actinobacteria;D_3__Micromonosporales;D_4__Micromonosporaceae;D_5__Hamadaea
1705e6a52ce00b433c14c048135fdf44	0	1	0	2	2	0	0	1	0	0	0	0	0	0	0	0	0	0	0	0	0	0	0	0	0	0	0	0	0	0	0	1	0	0	0	0	D_0__Bacteria;D_1__Proteobacteria;D_2__Alphaproteobacteria;D_3__Caulobacterales;D_4__Caulobacteraceae
510847e1bc00af426434f6d3c9a378cd	0	1	0	3	0	2	0	1	0	3	0	0	0	0	0	0	0	0	0	2	0	0	2	0	2	1	1	2	0	5	0	2	4	1	1	1	D_0__Bacteria;D_1__Bacteroidetes;D_2__Bacteroidia;D_3__Chitinophagales;D_4__Saprospiraceae;D_5__Phaeodactylibacter;D_6__uncultured Haliscomenobacter sp.
b2cdd9175c16c6782232fc9b7d7ce690	0	0	0	0	0	0	2	0	0	0	0	0	0	0	0	0	0	0	0	0	0	0	0	0	0	0	0	0	0	0	0	0	0	0	0	0	D_0__Bacteria;D_1__Actinobacteria;D_2__Thermoleophilia;D_3__Gaiellales;D_4__uncultured
434fcb3925fbd62201c2c1dd2674fc98	0	0	2	0	0	0	0	0	0	0	0	1	0	0	0	0	2	0	0	0	0	0	0	0	0	0	0	0	4	0	0	0	0	0	0	0	D_0__Bacteria;D_1__Proteobacteria;D_2__Deltaproteobacteria;D_3__Myxococcales;D_4__Sandaracinaceae;D_5__uncultured
d4472777f54adb4e945048bcba61e438	0	0	0	1	0	0	0	0	0	0	0	0	2	0	0	0	2	0	0	2	4	0	8	0	2	2	3	6	3	7	2	0	0	4	0	0	D_0__Bacteria;D_1__Gemmatimonadetes;D_2__Gemmatimonadetes;D_3__Gemmatimonadales;D_4__Gemmatimonadaceae;D_5__uncultured
72f731848a04d9ac409b0eb80e2f1d63	0	0	6	2	0	2	0	0	0	0	0	0	0	4	0	0	0	1	1	0	3	1	0	0	0	1	1	0	0	2	3	0	0	0	0	0	D_0__Bacteria;D_1__Acidobacteria;D_2__Subgroup 6
f03f57efbe301ddeede310fb6c00ca7f	0	0	0	0	0	0	0	1	2	0	0	0	0	5	7	4	0	0	2	0	2	5	3	1	8	1	3	2	8	3	0	0	0	0	0	1	D_0__Bacteria;D_1__Proteobacteria;D_2__Gammaproteobacteria;D_3__Xanthomonadales;D_4__Rhodanobacteraceae;D_5__Rhodanobacter
492e67e8278567e162ee5fdd43f4d788	7	14	0	7	5	3	3	4	9	8	6	1	1	1	4	6	4	0	3	2	3	1	0	6	5	3	5	4	4	0	1	1	1	2	1	1	D_0__Bacteria;D_1__Proteobacteria;D_2__Gammaproteobacteria;D_3__KF-JG30-C25
89c1dfd44ec51cfab0e36e264f02fd21	3	3	0	1	0	1	1	0	0	0	3	0	0	4	0	0	2	0	0	4	3	1	0	3	1	0	1	2	1	2	0	2	1	0	0	0	D_0__Bacteria;D_1__Actinobacteria;D_2__Acidimicrobiia;D_3__IMCC26256;D_4__uncultured Ferrimicrobium sp.;D_5__uncultured Ferrimicrobium sp.;D_6__uncultured Ferrimicrobium sp.
ef2a9d963ae6d8fbf5369fde8bf0e517	1	0	0	0	0	0	0	0	0	0	0	1	0	0	0	0	0	3	0	0	0	0	0	0	3	0	0	0	2	0	1	0	0	0	3	0	D_0__Bacteria;D_1__Bacteroidetes;D_2__Bacteroidia;D_3__Cytophagales;D_4__Microscillaceae
36b64be64637698b97eb331f147a4278	2	1	2	2	2	4	0	0	0	1	0	0	1	0	0	0	2	1	2	0	2	2	1	5	0	2	2	0	2	0	0	0	1	0	1	2	D_0__Bacteria;D_1__Proteobacteria;D_2__Gammaproteobacteria;D_3__Xanthomonadales;D_4__Xanthomonadaceae
d4e968414942c990513537fc8dfe9cb6	0	0	0	0	0	0	0	0	0	0	0	0	0	0	0	2	0	0	0	0	0	2	0	0	0	0	0	0	1	0	1	0	0	0	0	1	D_0__Bacteria;D_1__Proteobacteria;D_2__Deltaproteobacteria;D_3__Myxococcales;D_4__Archangiaceae;D_5__Anaeromyxobacter;D_6__Anaeromyxobacter sp. Fw109-5
289e3087268ccb898cb7d189a3b003aa	0	0	1	0	2	0	0	0	0	3	1	0	0	3	3	0	0	1	1	1	3	0	2	0	3	4	0	0	2	3	0	0	0	0	1	1	D_0__Bacteria;D_1__Actinobacteria;D_2__Actinobacteria;D_3__Frankiales;D_4__Geodermatophilaceae;D_5__Geodermatophilus
6d6cc8e0a66d7e4f08d31e8f550d80ed	0	0	0	1	0	0	0	0	0	0	0	0	0	0	2	0	0	1	0	0	0	0	0	0	0	5	0	0	0	0	1	0	0	0	2	0	D_0__Bacteria;D_1__Gemmatimonadetes;D_2__Gemmatimonadetes;D_3__Gemmatimonadales;D_4__Gemmatimonadaceae;D_5__uncultured;D_6__Gemmatimonadetes bacterium LP81
992adb14f52813aabee844c713c033c3	7	0	1	2	0	5	0	0	0	0	0	1	0	0	0	0	0	0	0	0	2	0	0	0	3	0	0	0	6	0	0	0	0	0	0	0	D_0__Bacteria;D_1__Proteobacteria;D_2__Gammaproteobacteria;D_3__Xanthomonadales;D_4__Xanthomonadaceae;D_5__Arenimonas
e601588d379d2375256885ac634df82f	0	0	0	0	0	0	0	0	0	0	1	2	0	0	1	0	1	0	0	1	0	0	0	0	0	0	0	1	0	0	0	0	0	0	0	0	D_0__Bacteria;D_1__Bacteroidetes;D_2__Bacteroidia;D_3__Chitinophagales;D_4__Chitinophagaceae
2e0d77cfb3f6325afececb03b6b0abae	0	0	0	0	0	0	0	0	0	0	1	0	0	0	0	0	0	0	0	0	0	0	0	0	0	0	0	0	0	0	0	1	0	0	2	0	D_0__Bacteria;D_1__Acidobacteria;D_2__Blastocatellia (Subgroup 4);D_3__Pyrinomonadales;D_4__Pyrinomonadaceae;D_5__RB41;D_6__uncultured delta proteobacterium
bf5714088be331813f37d516d25e7f10	0	0	0	0	0	2	1	0	0	0	0	0	0	2	0	0	0	0	3	0	0	0	0	0	0	0	1	0	0	0	0	0	0	0	0	0	D_0__Bacteria;D_1__Gemmatimonadetes;D_2__Gemmatimonadetes;D_3__Gemmatimonadales;D_4__Gemmatimonadaceae;D_5__uncultured;D_6__Gemmatimonadetes bacterium LX87
f93c2ec6e7129428ac3fb8cfb1494d9f	0	0	0	0	0	0	0	0	0	0	0	0	1	0	2	0	0	6	0	0	0	2	0	3	0	0	0	0	3	1	0	0	0	0	0	0	D_0__Bacteria;D_1__Actinobacteria;D_2__Acidimicrobiia;D_3__Microtrichales;D_4__Ilumatobacteraceae;D_5__uncultured;D_6__uncultured soil bacterium
4ba739ee5d076fd5146ad0a1bf917285	0	2	2	2	0	1	2	1	0	2	1	5	4	0	1	3	0	2	2	2	1	0	2	0	2	1	3	3	4	2	1	4	3	0	1	0	D_0__Bacteria;D_1__Proteobacteria;D_2__Alphaproteobacteria;D_3__Rhizobiales;D_4__Xanthobacteraceae
de9ae00ba9fbcb01ab268f6cfdb27829	0	0	0	0	0	0	0	0	1	0	5	0	0	0	2	2	0	0	0	0	0	4	0	0	2	2	2	0	0	1	0	0	0	0	1	0	D_0__Bacteria;D_1__Patescibacteria;D_2__Saccharimonadia;D_3__Saccharimonadales
be24cbb2a10491e485bbbd769028fa93	0	0	0	0	0	0	0	0	0	1	0	0	1	6	3	4	0	0	0	0	3	0	1	2	2	4	1	0	1	5	0	0	0	1	0	0	D_0__Bacteria;D_1__Proteobacteria;D_2__Alphaproteobacteria;D_3__Sphingomonadales;D_4__Sphingomonadaceae;D_5__Sphingomonas
564aadbeeba94ded696574831145bc62	0	0	0	0	0	0	0	0	0	0	0	0	0	0	0	0	0	0	0	0	0	1	0	0	0	0	0	0	0	0	0	0	0	0	0	0	D_0__Bacteria;D_1__Proteobacteria;D_2__Alphaproteobacteria;D_3__Acetobacterales;D_4__Acetobacteraceae
1efb24913bd391803625f4004fef2242	1	0	2	0	0	2	0	0	0	2	0	0	0	0	2	0	0	0	0	0	0	3	3	0	0	0	0	0	0	3	1	0	0	0	0	0	D_0__Bacteria;D_1__Proteobacteria;D_2__Gammaproteobacteria;D_3__Xanthomonadales;D_4__Xanthomonadaceae;D_5__Arenimonas;D_6__Arenimonas oryziterrae DSM 21050 = YC6267
6a2653b906ac149c951181bd99c441d7	0	0	1	0	0	0	0	1	0	1	2	0	2	5	4	2	0	0	0	0	0	1	0	0	0	0	0	0	4	2	0	0	2	1	1	0	D_0__Bacteria;D_1__Actinobacteria;D_2__Acidimicrobiia;D_3__Microtrichales;D_4__Ilumatobacteraceae;D_5__Ilumatobacter;D_6__uncultured forest soil bacterium
036d210e353764cbf3bd0978018ad1fa	0	0	0	0	2	0	0	0	1	0	0	0	0	0	0	0	2	1	2	1	0	1	7	0	0	0	0	2	3	0	2	1	0	2	1	0	D_0__Bacteria;D_1__Proteobacteria;D_2__Deltaproteobacteria
0215fd8e016a10e26db92959918e0128	0	0	0	0	0	0	0	0	0	0	0	0	0	3	1	3	0	0	1	1	0	0	1	0	1	0	0	2	0	3	0	0	0	0	0	0	D_0__Bacteria;D_1__Acidobacteria;D_2__Acidobacteriia;D_3__Solibacterales;D_4__Solibacteraceae (Subgroup 3);D_5__Candidatus Solibacter
dd8e321cb13e7affb0c0020aa0141cbd	0	0	0	0	0	0	0	0	7	0	2	0	0	3	0	0	0	0	1	0	0	1	0	3	0	1	0	0	0	0	0	0	0	0	0	0	D_0__Bacteria;D_1__Bacteroidetes;D_2__Bacteroidia;D_3__Sphingobacteriales;D_4__Sphingobacteriaceae;D_5__Mucilaginibacter
9efcad2f4147561078b84db7bf59cd58	0	0	2	2	0	0	0	0	0	0	0	0	0	3	2	0	2	0	3	0	3	0	0	2	2	5	4	0	2	0	0	1	0	2	1	0	D_0__Bacteria;D_1__Gemmatimonadetes;D_2__Gemmatimonadetes;D_3__Gemmatimonadales;D_4__Gemmatimonadaceae;D_5__uncultured;D_6__uncultured Fibrobacteres bacterium
3dee701e04c997e2f1a1eb9474ed022d	0	0	0	0	0	0	0	0	0	0	0	0	2	0	0	0	0	0	0	1	0	0	0	2	1	1	3	0	0	2	0	0	0	0	0	0	D_0__Bacteria;D_1__Proteobacteria;D_2__Deltaproteobacteria;D_3__Myxococcales
cdc3fb7d9f163fbfb1bb95cfdb198efe	0	0	0	0	0	2	0	0	0	0	0	1	0	0	0	0	0	0	0	0	0	0	0	1	0	0	0	0	0	0	0	1	1	0	0	0	D_0__Bacteria;D_1__Proteobacteria;D_2__Gammaproteobacteria;D_3__Betaproteobacteriales;D_4__Nitrosomonadaceae;D_5__mle1-7;D_6__uncultured bacterium mle1-7
67047bf0f2c153242cb46b338aa728cb	0	0	1	1	3	0	2	0	0	5	2	1	4	0	0	0	0	0	6	0	0	0	0	1	0	1	0	0	0	0	2	2	0	2	3	3	D_0__Bacteria;D_1__Proteobacteria;D_2__Gammaproteobacteria
80b64eb888fa6f64f6674b9a09ba6fb5	0	0	0	0	0	0	0	0	0	0	1	0	0	0	0	0	0	0	0	2	0	0	0	0	0	0	0	0	0	0	0	0	0	0	0	2	D_0__Bacteria;D_1__Acidobacteria;D_2__Acidobacteriia;D_3__Solibacterales;D_4__Solibacteraceae (Subgroup 3);D_5__Bryobacter;D_6__uncultured Solibacteraceae bacterium
52979d0a8a05c5989d6664fbb506b13c	0	3	0	0	0	0	0	2	0	0	0	1	0	0	0	1	0	0	2	2	0	2	0	0	0	0	0	0	0	0	2	0	0	2	0	0	D_0__Bacteria;D_1__Proteobacteria
e418a0ecb91a0077ca5a6045b6ba48f1	0	0	1	0	4	0	0	0	0	0	0	0	0	0	0	0	0	0	0	0	0	1	0	0	0	0	0	0	0	0	0	1	0	2	2	0	D_0__Bacteria;D_1__Acidobacteria;D_2__Blastocatellia (Subgroup 4);D_3__Pyrinomonadales;D_4__Pyrinomonadaceae;D_5__RB41;D_6__uncultured bacterium gp4
8878e1535c453747359c602ead339ad5	0	0	0	0	0	3	0	0	0	2	0	0	2	0	0	0	0	0	0	0	0	0	0	0	0	0	1	0	1	1	0	0	0	0	0	0	D_0__Bacteria;D_1__Actinobacteria;D_2__Thermoleophilia;D_3__Gaiellales;D_4__uncultured;D_5__uncultured bacterium 5G12;D_6__uncultured bacterium 5G12
0c4a7d8e018ab2f5fb385e0f1ce972bd	4	5	2	0	0	8	2	1	0	0	3	2	2	0	2	2	2	3	5	1	3	3	4	1	1	0	0	4	2	0	3	2	5	2	1	2	D_0__Bacteria;D_1__Proteobacteria;D_2__Deltaproteobacteria;D_3__Myxococcales;D_4__Haliangiaceae;D_5__Haliangium;D_6__myxobacterium AT3-03
a0317851b8d823edead05262f1f1885a	3	3	2	0	2	4	0	0	0	0	1	2	0	2	3	0	2	1	4	1	2	3	0	1	4	2	1	0	4	0	1	0	1	2	0	0	D_0__Bacteria;D_1__Acidobacteria;D_2__Blastocatellia (Subgroup 4);D_3__Blastocatellales;D_4__Blastocatellaceae
cf2c80c706b3f67fcbddd75c1fd4ae74	0	0	0	3	0	0	0	0	0	0	0	0	0	0	0	0	0	0	0	0	0	0	0	0	0	0	0	0	0	0	1	2	0	0	0	0	D_0__Bacteria;D_1__Proteobacteria;D_2__Alphaproteobacteria;D_3__Rhizobiales;D_4__Hyphomicrobiaceae;D_5__uncultured
059b036e9ad3612abf10674e8d48dad3	0	0	1	1	0	2	0	0	0	1	1	0	0	0	0	0	3	0	4	0	0	0	1	0	0	3	0	0	0	0	1	0	2	0	0	0	D_0__Bacteria;D_1__Actinobacteria;D_2__Thermoleophilia;D_3__Gaiellales;D_4__uncultured;D_5__bacterium Ellin7530;D_6__bacterium Ellin7530
e919b0a5d0469cdf0f4a06642c7f0ecb	0	0	0	0	3	4	4	1	0	0	0	0	0	0	0	0	0	0	0	0	0	0	0	0	0	0	0	0	0	0	0	1	2	0	0	0	D_0__Bacteria;D_1__Proteobacteria;D_2__Deltaproteobacteria;D_3__Myxococcales;D_4__Sandaracinaceae;D_5__uncultured;D_6__uncultured marine bacterium
3f24d03502ec900efb6f84efd274e03e	0	0	0	0	0	2	0	0	1	0	0	0	0	1	0	0	0	0	3	2	2	1	0	1	0	1	1	0	0	0	1	0	3	0	0	0	D_0__Bacteria;D_1__Firmicutes;D_2__Clostridia;D_3__Clostridiales;D_4__Clostridiaceae 1;D_5__Clostridium sensu stricto 5;D_6__Clostridium cavendishii
707eb74af47b90349c80b25316748d59	0	0	0	0	0	0	0	0	1	0	0	0	1	0	1	0	1	0	0	1	0	1	0	1	0	0	0	0	2	0	0	0	0	0	0	0	D_0__Bacteria;D_1__Proteobacteria;D_2__Alphaproteobacteria;D_3__Sphingomonadales;D_4__Sphingomonadaceae
db4b51a651f3fa4503c22cd85023dd49	0	0	0	2	0	0	0	0	0	0	2	1	0	0	0	0	0	0	0	0	0	0	0	0	0	0	0	0	0	0	0	1	1	0	0	0	D_0__Bacteria;D_1__Proteobacteria;D_2__Alphaproteobacteria;D_3__Caulobacterales;D_4__Caulobacteraceae
9b146b74ac700f2dc282b00017953096	0	0	0	0	1	0	0	0	0	0	0	0	0	3	1	0	4	0	5	1	2	5	2	0	9	12	0	1	6	7	2	2	2	2	0	10	D_0__Bacteria;D_1__Proteobacteria;D_2__Gammaproteobacteria;D_3__Xanthomonadales;D_4__Xanthomonadaceae;D_5__Lysobacter
4c5801a488d76b120e578cee95bfaac8	0	0	0	0	1	0	0	0	0	0	1	0	0	0	0	0	0	0	0	0	1	0	0	1	0	0	0	0	1	0	0	0	0	0	0	0	D_0__Bacteria;D_1__Proteobacteria;D_2__Alphaproteobacteria;D_3__Micropepsales;D_4__Micropepsaceae;D_5__uncultured
cb2a3691d57ce9b4bc4fbf6b01d211cc	9	27	9	16	18	14	26	15	41	16	25	19	34	9	11	6	25	11	10	14	6	7	7	16	36	8	7	21	19	41	23	8	8	11	8	7	D_0__Bacteria;D_1__Chloroflexi;D_2__Ktedonobacteria;D_3__Ktedonobacterales;D_4__JG30-KF-AS9;D_5__uncultured bacterium;D_6__uncultured bacterium
8b51b83bf540eb92a14a2a38e7edb275	3	0	0	0	0	0	0	0	0	1	0	0	0	0	0	0	0	0	0	1	0	2	0	0	0	0	0	0	0	0	0	0	0	2	0	0	D_0__Bacteria;D_1__Proteobacteria;D_2__Gammaproteobacteria;D_3__Steroidobacterales;D_4__Steroidobacteraceae;D_5__uncultured;D_6__uncultured Methylococcaceae bacterium
3fe3a7e4aadc896be4e4d2f4884660ee	0	0	3	0	0	3	2	0	0	0	1	0	0	6	0	4	2	4	0	0	2	2	0	2	3	2	0	2	4	0	1	0	1	2	0	0	D_0__Bacteria;D_1__Proteobacteria;D_2__Alphaproteobacteria;D_3__Acetobacterales;D_4__Acetobacteraceae;D_5__Roseomonas
1911b6114f12ddd17e6c629d8156835b	0	0	0	0	0	0	0	0	0	0	0	0	0	0	0	0	0	0	0	0	0	0	0	0	0	0	2	0	0	0	1	0	1	5	1	1	D_0__Bacteria;D_1__Actinobacteria;D_2__Actinobacteria;D_3__Propionibacteriales;D_4__Nocardioidaceae;D_5__Nocardioides
4f220de5e9f71bf4560d71ede3fcc63c	28	4	28	33	17	29	17	27	2	17	21	23	6	4	13	2	6	10	11	3	21	2	14	2	4	15	7	3	16	10	15	9	39	25	22	12	D_0__Bacteria;D_1__Gemmatimonadetes;D_2__Gemmatimonadetes;D_3__Gemmatimonadales;D_4__Gemmatimonadaceae;D_5__Gemmatimonas;D_6__Gemmatimonas phototrophica
0f6ab1d839be2868f5a7797b3fbd6ff3	9	0	6	6	3	9	16	1	3	2	6	6	0	0	0	0	0	0	0	0	0	1	0	2	0	0	0	0	0	0	0	2	8	0	0	0	D_0__Bacteria;D_1__Proteobacteria;D_2__Alphaproteobacteria;D_3__Rhizobiales;D_4__Rhizobiaceae;D_5__Allorhizobium-Neorhizobium-Pararhizobium-Rhizobium
308f1e0aaa94cee19fce85e01bfcba15	0	0	0	0	0	0	0	0	0	0	0	0	0	1	0	0	0	2	0	0	4	0	0	2	0	2	0	0	2	0	0	0	0	0	1	0	D_0__Bacteria;D_1__Acidobacteria;D_2__Subgroup 6
8ded6dc200bbf678cc08896a3ee1e2a8	0	2	3	0	0	0	0	1	0	0	0	1	0	0	0	0	0	0	1	0	0	2	0	0	0	0	0	0	0	0	0	0	2	0	1	0	D_0__Bacteria;D_1__Proteobacteria;D_2__Gammaproteobacteria;D_3__Betaproteobacteriales;D_4__Nitrosomonadaceae;D_5__MND1
9278672d984d4f44ef5866daa37551b0	0	0	0	0	0	0	0	0	0	0	0	0	1	0	0	0	0	0	0	0	0	0	0	0	1	3	2	0	0	0	0	0	0	0	0	1	D_0__Bacteria;D_1__Proteobacteria;D_2__Gammaproteobacteria;D_3__Betaproteobacteriales;D_4__SC-I-84
491433340b55f660178acb3ebc8baec0	0	0	0	0	0	1	0	0	0	0	0	0	0	2	3	0	0	0	0	0	0	2	0	0	0	3	0	0	2	0	0	0	3	0	0	1	D_0__Bacteria;D_1__Proteobacteria;D_2__Gammaproteobacteria;D_3__Xanthomonadales
b6e5cd43e457df94a5ee2b587672fdf9	0	0	0	0	0	0	0	0	0	0	3	0	0	0	0	0	0	0	0	0	0	0	0	0	0	0	0	0	0	0	0	1	0	0	0	0	D_0__Bacteria
1a8ffc9c1b97636414d0769c2564d4cd	0	0	0	1	0	0	0	0	1	0	0	2	0	0	0	0	0	0	0	0	2	0	0	1	0	0	0	3	0	0	0	0	0	0	0	0	D_0__Bacteria;D_1__Patescibacteria;D_2__Saccharimonadia;D_3__Saccharimonadales
7ecb991be79ce72d66682206dedc9181	0	0	1	0	0	0	0	0	0	0	0	0	0	0	0	0	0	0	0	0	0	0	0	0	0	0	0	0	1	0	0	0	0	0	0	0	D_0__Bacteria;D_1__Actinobacteria;D_2__Acidimicrobiia;D_3__Microtrichales
4cc7a2f802dfe7b7e1b4e57b8ebd7000	5	2	1	1	4	4	5	3	6	4	8	4	0	0	0	0	0	0	0	2	0	3	0	0	0	0	0	0	0	0	2	3	4	5	3	0	D_0__Bacteria;D_1__Acidobacteria;D_2__Holophagae;D_3__Subgroup 7
a01c31f1ffda095ceeb93fae4e841323	7	0	6	0	5	2	7	4	3	1	2	6	2	3	5	1	0	7	2	0	3	3	5	6	4	6	5	0	3	1	1	3	3	7	4	2	D_0__Bacteria;D_1__Bacteroidetes;D_2__Bacteroidia;D_3__Chitinophagales;D_4__Saprospiraceae;D_5__Phaeodactylibacter;D_6__uncultured Haliscomenobacter sp.
b0d3972865172314c8363c9b3b0045a8	0	0	0	0	0	1	0	0	0	0	0	0	1	3	3	0	0	0	0	0	0	0	0	0	0	0	1	0	0	0	0	0	0	0	0	0	D_0__Bacteria;D_1__Proteobacteria;D_2__Gammaproteobacteria;D_3__Diplorickettsiales;D_4__Diplorickettsiaceae;D_5__Aquicella
1922a522bda58528590ab09c56b817ce	10	15	12	18	8	12	7	11	13	14	13	8	23	18	10	15	23	18	31	9	17	25	14	16	7	15	19	7	13	8	14	10	9	10	4	5	D_0__Bacteria;D_1__Proteobacteria;D_2__Alphaproteobacteria;D_3__Rhizobiales;D_4__KF-JG30-B3;D_5__uncultured Phyllobacteriaceae bacterium;D_6__uncultured Phyllobacteriaceae bacterium
1827fc0483764773df67a4c7a6c19f84	0	1	0	1	0	0	0	0	0	0	0	0	3	4	5	4	8	0	2	4	1	1	0	2	4	1	0	1	2	0	0	0	0	0	0	0	D_0__Bacteria;D_1__Acidobacteria;D_2__Acidobacteriia;D_3__Solibacterales;D_4__Solibacteraceae (Subgroup 3);D_5__Bryobacter;D_6__uncultured Holophaga sp.
cb2899efcdd969569757868e90135104	3	0	1	2	3	1	0	1	0	0	2	0	0	1	0	0	0	0	3	0	0	0	2	0	0	1	2	0	0	2	0	0	0	1	0	0	D_0__Bacteria;D_1__Gemmatimonadetes;D_2__Gemmatimonadetes;D_3__Gemmatimonadales;D_4__Gemmatimonadaceae;D_5__Gemmatimonas
921d9d705b01b24e5817ccce842a3034	3	0	0	4	1	0	6	7	4	2	1	4	3	0	0	1	0	0	0	0	0	1	1	0	0	4	1	0	0	0	2	1	3	1	0	0	D_0__Bacteria;D_1__Bacteroidetes;D_2__Bacteroidia;D_3__Chitinophagales;D_4__Chitinophagaceae
424b41a163b56b6bc1eca6009d912c19	5	0	0	0	5	0	1	0	0	0	0	2	0	1	3	0	3	1	0	0	1	0	0	1	4	0	0	0	0	0	2	2	1	0	0	8	D_0__Bacteria;D_1__Bacteroidetes;D_2__Bacteroidia;D_3__Sphingobacteriales;D_4__Sphingobacteriaceae;D_5__Pedobacter
8ea2262923b9099d59953888fd2bd985	0	0	3	0	0	0	0	0	2	0	0	0	0	9	0	0	0	0	0	0	0	0	0	0	0	0	0	0	0	0	0	0	0	0	0	0	D_0__Bacteria;D_1__Actinobacteria;D_2__Actinobacteria;D_3__Micromonosporales;D_4__Micromonosporaceae;D_5__uncultured;D_6__uncultured Catellatospora sp.
1e9277ea2241bee2fc32a4d2a65acc1c	2	0	1	0	5	0	0	0	0	1	0	0	0	1	0	0	2	0	0	0	0	1	8	8	2	0	1	0	0	0	1	0	0	0	0	0	D_0__Bacteria;D_1__Proteobacteria;D_2__Alphaproteobacteria;D_3__Rhizobiales;D_4__Devosiaceae;D_5__Devosia
ba311424bc7a7e3ecdbda0413386b5a9	3	1	4	0	0	0	0	1	0	0	0	3	2	0	0	0	0	5	0	0	2	2	3	0	0	0	0	0	0	0	2	1	5	1	6	0	D_0__Bacteria;D_1__Acidobacteria;D_2__Subgroup 25;D_3__uncultured soil bacterium;D_4__uncultured soil bacterium;D_5__uncultured soil bacterium;D_6__uncultured soil bacterium
73932e35da866ffd8cabbef11dfab8d8	0	0	0	0	0	0	0	0	0	0	2	0	0	0	0	0	0	2	0	0	0	1	0	0	0	0	0	0	0	0	0	0	0	0	0	0	D_0__Bacteria;D_1__Actinobacteria;D_2__Thermoleophilia;D_3__Solirubrobacterales;D_4__67-14;D_5__bacterium YC-ZSS-LKJ159;D_6__bacterium YC-ZSS-LKJ159
7e00d5e1c1f7c617c05a052cab5c9941	0	0	1	0	0	0	0	0	0	0	0	0	0	0	0	2	0	0	1	3	0	2	0	0	1	0	1	0	0	0	0	0	2	0	0	0	D_0__Bacteria;D_1__Acidobacteria;D_2__Subgroup 6;D_3__Acidobacteria bacterium SCN 69-37;D_4__Acidobacteria bacterium SCN 69-37;D_5__Acidobacteria bacterium SCN 69-37;D_6__Acidobacteria bacterium SCN 69-37
4efc9977240617dc7d0da69ccd1c17f5	0	2	0	1	0	0	0	0	0	0	0	3	0	0	0	0	0	0	0	1	0	0	0	0	0	0	0	4	0	0	2	0	1	0	0	0	D_0__Bacteria;D_1__Latescibacteria
ed03c9d39c0a0ee5d1f67426389a52fa	3	0	1	0	0	0	0	0	0	0	1	0	0	1	0	0	0	3	0	3	3	0	0	0	0	0	0	0	2	0	0	0	0	0	0	0	D_0__Bacteria;D_1__Proteobacteria;D_2__Alphaproteobacteria;D_3__Sphingomonadales;D_4__Sphingomonadaceae;D_5__Altererythrobacter
28c03844b00513f0599467c68f48420c	1	0	0	1	1	0	0	0	0	0	0	0	0	0	0	0	0	1	0	0	0	0	0	0	0	3	0	0	0	0	0	0	0	0	0	0	D_0__Bacteria;D_1__Bacteroidetes;D_2__Bacteroidia;D_3__Chitinophagales;D_4__Chitinophagaceae;D_5__uncultured;D_6__Chitinophaga sp. BN130233
317155e3ea56a4f20505b9045d1ebfbe	0	2	0	0	1	1	0	0	0	0	0	0	0	0	0	0	0	0	0	0	0	0	0	0	0	0	0	0	0	0	0	1	0	0	0	0	D_0__Bacteria;D_1__Patescibacteria;D_2__Saccharimonadia;D_3__Saccharimonadales;D_4__metal-contaminated soil clone K20-27;D_5__metal-contaminated soil clone K20-27;D_6__metal-contaminated soil clone K20-27
d2f489d7b502e089a4a0d3b8082f65e4	0	0	0	0	0	0	0	0	0	0	0	0	0	0	0	0	0	0	0	0	0	0	0	0	0	0	0	2	0	0	0	0	0	0	0	0	D_0__Bacteria;D_1__Proteobacteria;D_2__Gammaproteobacteria;D_3__Pseudomonadales;D_4__Pseudomonadaceae;D_5__Pseudomonas
482fb2b169fb085aaf7d19c5950486ef	0	1	0	7	0	0	0	1	0	1	1	2	0	0	0	0	2	0	0	0	0	0	2	0	0	0	1	0	0	0	0	2	0	1	1	0	D_0__Bacteria;D_1__Bacteroidetes;D_2__Bacteroidia;D_3__Cytophagales;D_4__Microscillaceae;D_5__uncultured;D_6__Bacteroidetes bacterium N2
9d4bec685d8354015c13c90374ecef8c	0	0	0	0	0	0	0	0	0	0	0	0	0	0	0	0	2	0	1	0	0	2	0	0	0	0	0	0	0	0	0	0	0	0	0	0	D_0__Bacteria;D_1__Elusimicrobia;D_2__Lineage IIa;D_3__uncultured Elusimicrobia bacterium;D_4__uncultured Elusimicrobia bacterium;D_5__uncultured Elusimicrobia bacterium;D_6__uncultured Elusimicrobia bacterium
ee2bfbd05137408bebc4291b74f4bf34	1	2	0	1	0	1	2	0	1	0	1	0	0	2	0	1	0	0	5	0	0	0	0	0	0	0	0	0	0	0	0	0	0	0	0	0	D_0__Bacteria;D_1__Gemmatimonadetes;D_2__Gemmatimonadetes;D_3__Gemmatimonadales;D_4__Gemmatimonadaceae;D_5__uncultured
596940470d28e5cfcf3c7aa08db93def	0	1	0	0	0	0	0	0	0	1	0	0	0	0	0	0	0	0	0	0	0	0	0	0	0	0	0	0	0	0	0	0	0	0	0	0	D_0__Bacteria;D_1__Proteobacteria;D_2__Alphaproteobacteria;D_3__Acetobacterales;D_4__Acetobacteraceae
5fb340303419966c47a1851d0fe704ac	0	0	0	0	0	0	0	0	0	0	0	0	0	0	0	0	0	0	0	0	0	0	0	0	0	0	0	0	0	0	3	0	2	0	2	0	D_0__Bacteria;D_1__Actinobacteria;D_2__Thermoleophilia;D_3__Solirubrobacterales;D_4__Solirubrobacteraceae;D_5__Conexibacter
0d61a88a2716996aa06c3375007aa84d	1	0	0	0	8	0	0	0	0	0	0	0	0	0	6	3	3	1	0	0	2	0	0	0	0	0	0	0	0	0	0	0	0	0	0	0	D_0__Bacteria;D_1__Bacteroidetes;D_2__Bacteroidia;D_3__Sphingobacteriales;D_4__Sphingobacteriaceae;D_5__Pedobacter
6f55d77cc3b35fe8d25d92073559f1c5	0	1	8	3	1	10	0	10	0	0	0	2	1	6	3	4	4	10	11	2	1	2	5	18	2	3	5	0	6	1	6	3	0	2	0	5	D_0__Bacteria;D_1__Latescibacteria
cdf4b030bf737966125fc6ec1f4fafcb	0	0	0	0	0	0	0	0	1	0	0	0	0	0	0	0	0	0	0	0	0	0	0	0	0	0	0	0	0	0	0	0	0	0	0	0	D_0__Bacteria;D_1__Chloroflexi;D_2__Ktedonobacteria;D_3__Ktedonobacterales;D_4__JG30-KF-AS9
e700e1d81938de8a2173ae6c844212e8	1	0	0	0	0	0	0	0	0	0	0	1	0	1	0	0	0	0	0	0	0	0	0	2	0	1	0	0	0	0	2	0	0	2	2	0	D_0__Bacteria;D_1__Gemmatimonadetes;D_2__Gemmatimonadetes;D_3__Gemmatimonadales;D_4__Gemmatimonadaceae;D_5__uncultured;D_6__Gemmatimonadetes bacterium LX87
be4f1d69d82039cde6581861e99b3669	0	0	1	0	2	5	4	3	2	6	2	5	0	0	0	0	2	5	2	4	0	2	2	2	1	3	0	5	6	2	5	4	1	6	3	2	D_0__Bacteria;D_1__Proteobacteria;D_2__Alphaproteobacteria;D_3__Azospirillales;D_4__uncultured;D_5__uncultured Rhodospirillaceae bacterium;D_6__uncultured Rhodospirillaceae bacterium
43f9130a7c8b02277379d85b40e41dcf	0	1	1	0	0	0	2	0	0	1	1	4	0	2	0	2	3	0	0	8	3	0	6	2	0	0	1	6	1	1	1	0	0	0	3	4	D_0__Bacteria;D_1__Proteobacteria;D_2__Deltaproteobacteria;D_3__Myxococcales;D_4__Polyangiaceae;D_5__Pajaroellobacter
e05868ec7bade1fc94b77ec007a03ad8	0	0	0	1	0	0	0	2	1	0	0	0	0	0	0	0	0	0	2	0	0	0	0	0	0	0	0	0	0	0	0	0	0	0	0	1	D_0__Bacteria;D_1__Actinobacteria;D_2__Actinobacteria;D_3__Micromonosporales;D_4__Micromonosporaceae;D_5__uncultured
88a90ac12d07b1b52eb32f3f01d1b92d	0	0	0	0	0	0	0	0	0	0	0	0	0	0	0	1	0	0	0	1	0	0	2	0	0	0	2	0	0	0	0	0	0	0	0	0	D_0__Bacteria;D_1__Proteobacteria;D_2__Gammaproteobacteria;D_3__Betaproteobacteriales;D_4__Sulfuricellaceae;D_5__Sulfuricella
09643ac4d3b4b7a1afaf9bf259b974fc	0	0	0	0	0	0	0	0	0	0	0	0	0	0	0	0	0	0	2	0	0	0	0	0	0	0	0	0	0	0	2	0	1	1	2	0	D_0__Bacteria;D_1__Acidobacteria;D_2__Acidobacteriia;D_3__Solibacterales;D_4__Solibacteraceae (Subgroup 3);D_5__Bryobacter;D_6__uncultured actinobacterium
730d0dac99443c29b02d882cf91b7309	0	1	0	0	0	0	1	0	0	0	0	0	0	0	0	0	0	0	0	2	3	0	0	0	0	0	0	0	0	0	0	0	0	0	0	0	D_0__Bacteria;D_1__Verrucomicrobia;D_2__Verrucomicrobiae
c8750b5bc6fb5c80a46a2b8ad2803505	0	0	0	0	0	0	0	0	1	0	1	0	0	1	0	0	0	0	1	0	0	0	1	0	1	0	0	0	0	0	0	1	0	0	3	0	D_0__Bacteria;D_1__Acidobacteria;D_2__Subgroup 6
19e0a57dcf3f6c1f036a076be20a6932	0	0	0	0	0	0	0	0	0	1	0	0	0	0	0	0	0	0	0	0	0	0	0	0	0	0	0	0	0	0	0	1	0	0	2	0	D_0__Bacteria;D_1__Acidobacteria;D_2__Holophagae;D_3__Subgroup 7;D_4__uncultured Desulfovirga sp.;D_5__uncultured Desulfovirga sp.;D_6__uncultured Desulfovirga sp.
b9d79a36d965d852713828ae16a426c4	0	0	0	0	0	0	0	0	0	0	0	0	0	0	1	0	0	0	0	0	0	0	0	0	0	0	0	0	0	0	0	0	0	0	0	0	D_0__Bacteria;D_1__Gemmatimonadetes;D_2__Gemmatimonadetes;D_3__Gemmatimonadales;D_4__Gemmatimonadaceae;D_5__uncultured;D_6__Gemmatimonadetes bacterium WWH24
c4ab2315078a48f2ecea99973ca41b3c	1	1	0	0	2	0	0	0	0	0	0	0	0	0	0	0	0	0	0	0	1	0	0	0	3	0	0	0	0	0	0	0	0	0	1	0	D_0__Bacteria;D_1__Bacteroidetes;D_2__Bacteroidia;D_3__Chitinophagales;D_4__Chitinophagaceae;D_5__uncultured;D_6__Flavihumibacter sp. MC113
49689c5b41fe62e99d6c0af92f1713b6	0	0	0	0	0	0	0	0	0	0	0	0	2	0	0	0	0	0	0	0	0	0	0	0	0	0	0	0	0	0	4	0	0	0	0	0	D_0__Bacteria;D_1__Proteobacteria;D_2__Alphaproteobacteria
65f51d445e2abc5c0e6dd0583d803a62	0	1	0	0	0	0	0	0	0	2	2	0	1	1	0	0	0	0	1	0	0	0	3	0	0	0	0	0	0	0	0	0	0	1	3	3	D_0__Bacteria;D_1__Proteobacteria;D_2__Deltaproteobacteria;D_3__Desulfarculales;D_4__Desulfarculaceae;D_5__uncultured
755e39d9e794ca7fbed2848cc681e035	0	0	0	0	0	0	0	0	0	0	0	0	0	0	1	0	0	1	0	0	0	0	0	0	0	0	0	0	0	0	0	0	0	0	0	1	D_0__Bacteria;D_1__Acidobacteria;D_2__Subgroup 6
fa8090891387567404dff882723edb77	2	0	0	2	2	0	1	0	1	0	0	0	0	0	0	0	0	0	0	0	0	0	0	0	1	0	0	0	0	0	0	0	0	0	0	0	D_0__Bacteria;D_1__Acidobacteria;D_2__Acidobacteriia;D_3__Acidobacteriales;D_4__Koribacteraceae;D_5__Candidatus Koribacter
90d8303e4132772269e936b3af146c86	1	0	1	7	5	0	5	1	4	0	1	0	0	0	6	0	3	0	0	0	0	3	0	0	3	2	1	0	2	2	1	2	0	0	0	0	D_0__Bacteria;D_1__Proteobacteria;D_2__Gammaproteobacteria;D_3__Betaproteobacteriales
cd2bf62ad895f40d671bc024aec568da	0	0	0	1	0	0	0	2	0	0	0	0	0	0	0	0	0	0	0	0	0	0	0	0	2	0	2	0	0	0	1	1	0	1	0	0	D_0__Bacteria;D_1__Bacteroidetes;D_2__Bacteroidia;D_3__Chitinophagales;D_4__Chitinophagaceae;D_5__uncultured
386ac36d8b45540039de9e6145bc9ad2	1	0	1	0	0	5	0	1	4	0	0	0	0	0	0	0	0	0	0	0	0	0	0	0	0	0	0	0	0	0	0	0	0	0	0	0	D_0__Bacteria;D_1__Bacteroidetes;D_2__Bacteroidia;D_3__Chitinophagales;D_4__Chitinophagaceae;D_5__Terrimonas
415336165772ea1877f25b1c5e8df7c9	0	0	0	0	2	1	0	2	2	0	0	0	1	0	2	0	0	1	0	0	0	0	0	0	1	1	1	0	0	0	0	0	0	1	0	0	D_0__Bacteria;D_1__Proteobacteria;D_2__Alphaproteobacteria;D_3__Rhizobiales;D_4__KF-JG30-B3;D_5__uncultured Phyllobacteriaceae bacterium;D_6__uncultured Phyllobacteriaceae bacterium
b02d5e5c29b277a1fd0382cb1d87254f	0	0	0	0	0	0	0	0	0	1	0	0	1	0	0	0	0	0	0	2	0	0	2	0	0	0	1	0	0	1	0	0	0	0	0	0	D_0__Bacteria;D_1__Gemmatimonadetes;D_2__Gemmatimonadetes;D_3__Gemmatimonadales;D_4__Gemmatimonadaceae;D_5__Gemmatimonas
95aa41be0f2e2cae95ac06a1d654a1d0	0	0	0	0	0	0	1	0	0	0	0	0	0	0	0	0	3	0	0	0	0	2	0	0	0	0	0	2	1	0	0	0	1	0	0	0	D_0__Bacteria;D_1__Acidobacteria;D_2__Acidobacteriia;D_3__Solibacterales;D_4__Solibacteraceae (Subgroup 3)
f98f49ab80a9b306ba33a020a797e4a1	0	0	0	0	0	0	0	0	0	0	0	0	0	0	1	0	0	0	0	0	0	0	0	0	0	1	0	0	0	5	0	0	0	0	0	0	D_0__Bacteria;D_1__Actinobacteria;D_2__Actinobacteria;D_3__Micrococcales;D_4__Microbacteriaceae
deb5c6d8e54a4792bb37c29e959ef3cf	0	1	1	2	3	2	2	10	6	17	0	6	2	0	2	0	0	0	2	0	0	2	2	0	0	0	3	3	0	0	1	2	0	4	0	2	D_0__Bacteria;D_1__Latescibacteria;D_2__Latescibacteria;D_3__Latescibacterales;D_4__Latescibacteraceae;D_5__metagenome;D_6__metagenome
78b59631f1cf9581b2bc3891e50d8425	0	0	0	0	2	0	0	0	0	0	2	0	0	0	0	0	0	0	2	0	5	0	0	0	0	0	0	0	0	0	0	0	0	0	0	0	D_0__Bacteria;D_1__Proteobacteria;D_2__Alphaproteobacteria;D_3__Dongiales;D_4__Dongiaceae;D_5__Dongia
abb4ddefdee6d58267a8f2e41bacc1cd	0	0	0	0	0	0	0	0	0	0	0	0	0	0	0	4	0	2	0	0	0	0	0	1	0	1	0	0	0	0	0	0	0	0	0	0	D_0__Bacteria;D_1__Bacteroidetes;D_2__Bacteroidia;D_3__Chitinophagales;D_4__Chitinophagaceae;D_5__Ferruginibacter;D_6__uncultured prokaryote
3bd5a700bcfa9f2974a071f179fcee9b	0	0	1	2	0	2	0	0	0	0	2	0	0	0	0	0	0	0	0	0	0	0	0	0	0	0	0	0	0	0	0	0	0	1	1	0	D_0__Bacteria;D_1__Firmicutes;D_2__Clostridia;D_3__Clostridiales;D_4__Lachnospiraceae
6c12ab1c5c4d607f0a73552b52bd7a76	0	0	2	0	0	0	0	0	0	2	0	0	0	0	0	0	0	0	0	0	0	0	0	0	0	0	0	0	0	0	0	0	0	0	0	0	D_0__Bacteria;D_1__Proteobacteria;D_2__Deltaproteobacteria;D_3__Desulfarculales;D_4__Desulfarculaceae;D_5__uncultured
195fb1cf470a29d6ce74bb7c8f4de28c	0	1	4	2	2	2	1	4	0	4	1	0	0	1	2	0	0	0	0	0	2	1	0	0	0	0	1	0	0	2	6	13	4	7	4	7	D_0__Bacteria;D_1__Latescibacteria;D_2__uncultured proteobacterium;D_3__uncultured proteobacterium;D_4__uncultured proteobacterium;D_5__uncultured proteobacterium;D_6__uncultured proteobacterium
277f4c5c9296cae01d0023217b6cbabb	0	7	0	1	5	5	5	4	2	1	6	1	5	3	0	8	6	2	0	6	3	4	6	12	2	0	6	4	2	7	2	8	5	5	3	5	D_0__Bacteria;D_1__Proteobacteria;D_2__Alphaproteobacteria;D_3__Caulobacterales;D_4__Caulobacteraceae;D_5__uncultured
d7486c52c90c8c52314efd39e5b15bb7	0	1	0	1	0	0	1	1	0	0	0	0	0	0	0	0	0	0	0	0	0	0	0	0	0	0	0	0	0	0	0	0	0	0	0	0	D_0__Bacteria;D_1__Proteobacteria;D_2__Alphaproteobacteria;D_3__Micropepsales;D_4__Micropepsaceae;D_5__uncultured
7c6d19f320e9bf4fce4756a777a48f2c	0	1	0	0	1	2	0	0	0	0	1	3	2	0	2	8	3	1	0	6	1	0	6	0	0	1	3	3	0	1	2	0	0	3	2	5	D_0__Bacteria;D_1__Gemmatimonadetes;D_2__Gemmatimonadetes;D_3__Gemmatimonadales;D_4__Gemmatimonadaceae;D_5__uncultured
b7dbbc7bb169470fc6095ea37b14d772	0	0	0	0	1	0	2	0	0	0	1	0	5	2	0	0	2	2	3	0	2	13	10	3	2	0	0	3	0	3	0	0	0	2	2	0	D_0__Bacteria;D_1__Proteobacteria;D_2__Gammaproteobacteria;D_3__Betaproteobacteriales;D_4__Burkholderiaceae
1b8121d78685b45ade447cf5f1efad63	0	0	0	0	0	0	0	0	1	0	4	0	0	0	0	0	0	0	0	0	0	0	0	0	0	0	0	0	0	0	0	1	1	0	0	0	D_0__Bacteria;D_1__Proteobacteria;D_2__Gammaproteobacteria;D_3__Betaproteobacteriales;D_4__Burkholderiaceae
e04453db2888f3fe364217bc95b16091	0	1	0	0	0	0	0	0	0	0	0	0	4	0	4	2	0	0	0	0	0	0	2	0	0	0	0	0	0	0	0	0	0	0	0	0	D_0__Bacteria;D_1__Chloroflexi;D_2__AD3
7ec64f8ad351745f98db48e345acc0a5	0	0	0	0	0	0	1	0	0	0	2	0	0	0	0	0	0	0	0	0	3	0	0	0	0	0	0	0	0	0	1	0	0	0	1	0	D_0__Bacteria;D_1__Bacteroidetes;D_2__Bacteroidia;D_3__Cytophagales;D_4__Hymenobacteraceae;D_5__Adhaeribacter
16cd53f0d1d0dc9ee949289342c988b1	0	0	0	0	0	0	0	0	0	0	0	0	0	0	0	0	0	0	1	1	0	0	4	0	0	2	0	4	1	1	0	0	0	0	0	1	D_0__Bacteria;D_1__Acidobacteria;D_2__Acidobacteriia;D_3__Solibacterales;D_4__Solibacteraceae (Subgroup 3);D_5__Bryobacter
3e7102ab4fdbda5cdbfa6630754e5c1e	0	0	0	0	0	0	0	0	0	5	0	2	0	0	0	0	0	1	0	0	0	0	0	0	0	0	0	0	0	0	0	0	0	1	0	2	D_0__Bacteria;D_1__Proteobacteria;D_2__Gammaproteobacteria;D_3__Cellvibrionales;D_4__Porticoccaceae;D_5__Porticoccus
7051ac14fd0e6381d188a6f3e58e032b	0	0	0	0	0	0	0	0	0	0	2	0	0	0	0	0	0	0	0	0	1	0	0	0	0	4	2	0	0	0	0	0	0	2	3	0	D_0__Bacteria;D_1__Actinobacteria
87953e1ed304f36e835696a4a0b25b07	0	1	0	0	0	2	0	0	0	0	0	0	0	0	0	0	0	0	0	0	0	0	0	0	0	0	0	0	0	0	0	1	1	1	0	0	D_0__Bacteria;D_1__Proteobacteria;D_2__Alphaproteobacteria
3999b36b07adbf2d1566377fbd1a099d	0	0	3	2	0	0	0	0	2	0	1	0	6	3	1	0	4	9	10	1	0	1	0	4	3	2	3	4	1	1	4	1	1	0	0	2	D_0__Bacteria;D_1__Chloroflexi;D_2__TK10;D_3__uncultured Chloroflexus sp.;D_4__uncultured Chloroflexus sp.;D_5__uncultured Chloroflexus sp.;D_6__uncultured Chloroflexus sp.
f0fece4db84ade271e870236410e14fe	0	0	0	1	0	0	0	0	0	0	0	0	0	0	0	0	0	0	0	0	0	0	0	0	0	0	4	0	0	0	0	4	0	0	2	2	D_0__Bacteria;D_1__Patescibacteria;D_2__Berkelbacteria;D_3__uncultured bacterium;D_4__uncultured bacterium;D_5__uncultured bacterium;D_6__uncultured bacterium
cc0288295a8e28eff136dbc70c30fde8	1	0	0	0	0	0	0	0	0	1	0	0	3	0	0	1	2	0	0	4	2	2	0	0	5	0	0	0	0	0	0	0	0	0	0	0	D_0__Bacteria;D_1__Proteobacteria;D_2__Alphaproteobacteria;D_3__Sphingomonadales;D_4__Sphingomonadaceae
48158798c0fce014e93351eb8e682da2	0	0	0	0	0	0	0	0	0	0	0	0	0	2	0	0	0	2	0	0	3	0	3	0	0	0	0	0	0	1	0	0	0	0	0	1	D_0__Bacteria;D_1__Proteobacteria;D_2__Gammaproteobacteria;D_3__Betaproteobacteriales
af777ab2a807243197e9624d966b4df3	3	2	2	0	0	0	0	0	0	0	0	0	0	0	0	0	0	0	0	0	0	1	0	0	0	0	1	0	0	0	0	0	0	0	0	0	D_0__Bacteria;D_1__Proteobacteria;D_2__Alphaproteobacteria;D_3__Rhizobiales;D_4__KF-JG30-B3;D_5__uncultured soil bacterium;D_6__uncultured soil bacterium
07196bf5b608cda3eaf71300aca72e33	2	0	0	0	0	0	1	0	3	0	0	2	0	0	0	0	0	0	0	0	0	0	0	0	2	0	0	0	0	0	1	2	0	0	1	5	D_0__Bacteria;D_1__Proteobacteria;D_2__Deltaproteobacteria;D_3__Myxococcales;D_4__Haliangiaceae;D_5__Haliangium
f55cdb0f2b060c2a2a425bc9ccc1a579	0	0	1	0	0	0	0	0	0	0	0	2	0	0	0	0	0	2	0	0	0	0	0	0	0	0	0	0	0	0	2	0	0	1	0	3	D_0__Bacteria;D_1__Proteobacteria;D_2__Deltaproteobacteria;D_3__Myxococcales;D_4__Haliangiaceae;D_5__Haliangium
57f9bb844d1e05efe523b81ff82ba14a	0	0	0	0	0	0	0	0	0	0	0	1	0	0	0	0	0	0	0	0	0	0	0	0	0	2	0	0	0	0	0	0	1	0	0	0	D_0__Bacteria;D_1__Gemmatimonadetes;D_2__Gemmatimonadetes;D_3__Gemmatimonadales;D_4__Gemmatimonadaceae;D_5__Gemmatimonas;D_6__Gemmatimonadetes bacterium Ellin7146
080d829802a002e4c1cfac9577e58fd2	0	0	0	0	0	0	0	0	0	0	0	0	0	0	0	0	0	0	0	0	0	3	0	0	0	0	0	0	0	0	0	2	3	2	0	0	D_0__Bacteria;D_1__Proteobacteria;D_2__Deltaproteobacteria;D_3__Myxococcales;D_4__Archangiaceae;D_5__Anaeromyxobacter
cef407d93af6cf036a9ff334d73a7e89	0	0	0	0	1	0	2	0	0	0	0	0	0	0	0	0	2	0	0	2	0	0	0	0	0	0	0	0	0	2	0	0	0	0	0	0	D_0__Bacteria;D_1__Proteobacteria;D_2__Alphaproteobacteria;D_3__Rhizobiales;D_4__Xanthobacteraceae;D_5__Bradyrhizobium
0b28b58cef7545fa0e212f11f6341e14	0	0	0	0	0	0	0	0	0	0	2	3	0	0	0	0	0	0	0	0	0	0	0	0	0	0	0	0	0	0	0	0	0	0	0	2	D_0__Bacteria;D_1__Firmicutes;D_2__Bacilli;D_3__Lactobacillales;D_4__Enterococcaceae;D_5__Enterococcus
e03a7f17db9cc1f2bf6cd9ff7ae52f71	0	0	0	0	1	0	0	0	0	0	0	0	0	0	0	0	0	0	0	0	0	2	0	0	0	0	0	0	1	0	0	0	0	0	0	0	D_0__Bacteria;D_1__Acidobacteria;D_2__Acidobacteriia;D_3__Acidobacteriales;D_4__uncultured
d17970b573663739f423e9c7e37b327a	0	0	0	1	0	0	1	1	0	1	0	0	0	0	0	0	2	0	0	0	0	1	0	0	0	0	0	0	0	0	1	0	0	0	2	0	D_0__Bacteria;D_1__Bacteroidetes;D_2__Bacteroidia;D_3__Chitinophagales;D_4__Chitinophagaceae;D_5__Parafilimonas
7e5c23a2942a7e5d2c87dd6a0e7138b2	6	0	1	0	0	0	3	0	0	0	0	0	0	0	0	0	0	0	0	0	0	0	0	0	0	0	0	0	0	0	0	0	0	0	1	0	D_0__Bacteria;D_1__Bacteroidetes;D_2__Bacteroidia;D_3__Flavobacteriales;D_4__Flavobacteriaceae;D_5__Flavobacterium
cde9c61ce2f492fc05b0dc971445b23f	0	0	0	0	1	0	0	0	0	0	0	0	0	0	0	0	0	0	0	0	0	3	0	0	0	0	0	2	0	0	0	0	0	0	0	0	D_0__Bacteria;D_1__Acidobacteria;D_2__Blastocatellia (Subgroup 4);D_3__DS-100
9cff10c7c663e327000b86abb8985b83	3	0	0	0	1	0	0	1	0	0	2	0	0	1	0	0	1	0	0	4	3	0	9	1	3	0	0	0	0	3	2	0	0	0	0	0	D_0__Bacteria;D_1__Bacteroidetes;D_2__Bacteroidia;D_3__Sphingobacteriales;D_4__Sphingobacteriaceae;D_5__Pedobacter
1dd66ff9bd4ecdf6d5dbd5dbd17ab52b	0	0	0	0	0	0	0	0	1	0	1	0	0	0	2	0	0	0	0	0	2	0	0	0	0	0	0	0	0	0	1	0	1	4	0	2	D_0__Bacteria;D_1__Bacteroidetes;D_2__Bacteroidia;D_3__Chitinophagales;D_4__Chitinophagaceae
e5f94417406b33b1c512147fd6f2354f	1	0	2	0	0	0	0	0	0	0	0	0	0	0	0	0	0	0	0	0	0	0	0	0	0	0	0	0	0	0	0	0	0	0	0	0	D_0__Bacteria;D_1__Proteobacteria;D_2__Gammaproteobacteria;D_3__Betaproteobacteriales;D_4__Burkholderiaceae
a4bb1e5d725b1a71170c63ad2726d94b	0	0	0	3	0	0	0	0	0	0	0	0	0	2	0	1	3	0	2	0	0	2	0	0	3	1	1	0	2	2	1	0	0	0	1	6	D_0__Bacteria;D_1__Proteobacteria;D_2__Gammaproteobacteria;D_3__Xanthomonadales;D_4__Rhodanobacteraceae;D_5__Rhodanobacter
5a5cb2b96cd006ae96b7bfdd4d80b3d7	2	0	1	0	1	0	1	0	0	0	0	0	0	0	0	0	0	0	0	0	0	0	0	0	0	0	0	0	0	0	0	0	1	0	1	0	D_0__Bacteria;D_1__Proteobacteria;D_2__Gammaproteobacteria;D_3__Betaproteobacteriales;D_4__Nitrosomonadaceae;D_5__mle1-7;D_6__uncultured Burkholderiales bacterium
19118c459a4933110995d5a4bf74e077	0	0	0	0	2	0	0	0	0	0	0	0	0	0	0	0	0	0	0	0	0	1	0	0	0	0	0	0	0	0	0	0	0	0	0	0	D_0__Bacteria;D_1__Acidobacteria;D_2__Acidobacteriia;D_3__Acidobacteriales;D_4__Acidobacteriaceae (Subgroup 1);D_5__Occallatibacter
0871de576332974d72bb4c477b144e45	0	0	0	1	4	0	0	0	0	0	0	0	0	0	0	0	0	0	0	0	0	0	0	0	0	0	0	0	0	0	0	0	0	0	0	4	D_0__Bacteria;D_1__Proteobacteria;D_2__Gammaproteobacteria;D_3__Betaproteobacteriales;D_4__Burkholderiaceae
2668a03faa6ee0fb272078abfaa35b35	0	0	0	0	0	0	0	0	0	0	0	0	3	1	9	2	3	0	0	11	4	7	9	2	8	1	0	11	3	3	11	3	3	16	9	10	D_0__Bacteria;D_1__Bacteroidetes;D_2__Bacteroidia;D_3__Sphingobacteriales;D_4__Sphingobacteriaceae;D_5__Pedobacter
1d168c57e997a2796fcee8f0b5caca46	5	1	0	0	0	0	3	4	0	1	0	1	0	0	0	0	0	0	0	0	0	2	2	0	1	0	0	0	0	1	0	1	0	1	0	0	D_0__Bacteria;D_1__Proteobacteria;D_2__Deltaproteobacteria;D_3__Myxococcales
be67dd38c7e332016e57bb083ace7881	0	0	0	0	0	0	0	0	0	0	0	0	0	0	0	0	0	0	0	0	2	0	0	0	2	0	1	0	0	1	0	0	0	0	0	0	D_0__Bacteria;D_1__Actinobacteria;D_2__Actinobacteria;D_3__Micrococcales;D_4__Microbacteriaceae
23ec3587fe12ea4e7492df810f4d7e73	2	0	0	3	1	0	1	0	5	5	0	2	1	0	0	0	0	0	1	0	3	0	1	0	0	5	0	2	0	0	0	1	5	0	0	0	D_0__Bacteria;D_1__Proteobacteria;D_2__Gammaproteobacteria;D_3__Gammaproteobacteria Incertae Sedis;D_4__Unknown Family;D_5__Acidibacter;D_6__Punica granatum (pomegranate)
402680fc9996cc446e8011ae3d28c706	0	0	0	0	0	0	0	0	0	0	3	1	0	0	0	0	0	0	0	0	0	0	0	0	0	0	3	0	0	0	3	0	0	0	2	0	D_0__Bacteria;D_1__Proteobacteria;D_2__Alphaproteobacteria;D_3__Rhizobiales;D_4__Rhizobiaceae
6d2809cda6438f72442c7292c41b55ac	4	0	0	7	0	0	4	0	0	0	0	5	0	9	0	0	0	2	0	0	8	0	2	0	3	3	3	2	0	0	3	0	0	2	0	2	D_0__Bacteria;D_1__Bacteroidetes;D_2__Bacteroidia;D_3__Flavobacteriales;D_4__Flavobacteriaceae;D_5__Flavobacterium
a89e72c7e97020abe94634c000689ba7	0	0	0	0	0	0	0	0	0	0	0	1	0	0	0	0	0	0	3	0	0	0	0	0	0	2	0	0	1	0	0	2	0	0	0	0	D_0__Bacteria;D_1__Latescibacteria;D_2__metagenome;D_3__metagenome;D_4__metagenome;D_5__metagenome;D_6__metagenome
60198cd580325a7d64b67c900ef15b8d	0	0	0	0	0	0	0	0	0	0	0	0	0	0	0	0	0	0	1	0	1	2	0	0	0	1	0	0	1	0	0	0	0	0	0	0	D_0__Bacteria;D_1__Proteobacteria;D_2__Gammaproteobacteria;D_3__Betaproteobacteriales;D_4__SC-I-84
5675942ef69da3ba92ce92fb24d3a3f2	0	0	1	0	1	0	0	0	0	0	2	0	0	0	0	0	0	0	0	0	0	0	0	0	0	0	0	0	0	0	0	0	0	0	0	0	D_0__Bacteria;D_1__Proteobacteria;D_2__Deltaproteobacteria;D_3__Myxococcales;D_4__Polyangiaceae;D_5__Pajaroellobacter;D_6__uncultured Byssovorax sp.
0f82839d26278b5d81187cbb3647e2da	1	1	0	1	0	2	0	0	0	0	0	0	0	0	0	0	0	0	0	0	0	0	0	0	0	0	0	0	0	0	1	0	2	1	0	1	D_0__Bacteria;D_1__Proteobacteria;D_2__Gammaproteobacteria;D_3__Betaproteobacteriales;D_4__SC-I-84
8a4776a0e1855f53f1c48d58500959bf	0	0	0	0	0	0	2	0	0	0	0	0	0	2	0	0	0	0	0	0	0	0	0	0	0	0	0	0	0	0	3	0	0	0	0	0	D_0__Bacteria;D_1__Verrucomicrobia;D_2__Verrucomicrobiae;D_3__Pedosphaerales;D_4__Pedosphaeraceae
823bec0b9e1c0d1ae73d1095c55469c5	0	0	0	1	0	0	0	0	2	0	0	0	0	0	0	0	0	0	0	0	0	0	0	2	0	1	0	0	0	0	0	0	0	0	0	2	D_0__Bacteria;D_1__Bacteroidetes;D_2__Bacteroidia;D_3__Chitinophagales;D_4__37-13
943cc8376fb6c8fdf3372a1be6c0bea4	0	0	0	0	0	0	0	0	0	0	2	0	0	0	0	0	0	0	0	5	0	0	0	0	0	0	1	0	0	0	0	0	0	1	0	0	D_0__Bacteria;D_1__Chloroflexi;D_2__Chloroflexia;D_3__Chloroflexales;D_4__Roseiflexaceae;D_5__uncultured;D_6__uncultured Chloroflexaceae bacterium
979512e2d82e6e6afe0b89a211037f41	10	3	1	1	2	5	8	8	7	6	19	4	0	5	6	3	0	8	8	3	13	4	2	1	0	2	0	0	0	4	3	2	3	8	7	6	D_0__Bacteria;D_1__Bacteroidetes;D_2__Bacteroidia;D_3__Chitinophagales;D_4__Chitinophagaceae
99bb29c794a90eb9e6be072ce6ef58f9	0	2	2	1	0	0	0	0	0	0	0	3	0	0	0	0	0	0	0	0	0	0	0	0	0	0	0	0	0	0	1	2	0	1	0	0	D_0__Bacteria;D_1__Patescibacteria;D_2__Saccharimonadia;D_3__Saccharimonadales;D_4__uncultured Epsilonproteobacteria bacterium;D_5__uncultured Epsilonproteobacteria bacterium;D_6__uncultured Epsilonproteobacteria bacterium
068f18af3ea46ecacf8f5f474e2f2b4a	0	0	0	0	0	0	0	0	0	0	0	0	2	1	0	0	0	0	0	0	0	0	0	3	0	0	0	2	0	0	0	0	0	0	0	0	D_0__Bacteria;D_1__Proteobacteria;D_2__Alphaproteobacteria;D_3__Rhizobiales;D_4__Hyphomicrobiaceae;D_5__Hyphomicrobium
05068e7f41866dc8a3b801dd0af49a0b	0	0	0	0	0	0	0	0	0	0	0	0	5	0	0	0	0	0	0	0	0	5	0	0	0	0	1	4	0	0	0	1	0	2	0	0	D_0__Bacteria
4800c5eb5c82b468e350fc8b8623224f	2	0	12	5	1	5	2	1	0	3	2	3	0	2	3	0	4	3	0	2	5	0	0	0	4	4	2	0	3	2	1	3	0	2	2	1	D_0__Bacteria;D_1__Bacteroidetes;D_2__Bacteroidia;D_3__Cytophagales;D_4__Microscillaceae;D_5__uncultured
7068628b0b28656d51a23515f0374265	3	3	6	3	1	10	0	0	2	0	0	1	0	0	0	0	0	1	0	0	0	1	0	0	0	0	0	0	0	0	0	0	0	0	1	1	D_0__Bacteria;D_1__Acidobacteria;D_2__Acidobacteriia;D_3__Solibacterales;D_4__Solibacteraceae (Subgroup 3)
4f5ee4ca2e402cf3b88caec2589dec0f	0	0	0	0	2	0	1	0	0	0	0	0	0	0	0	0	0	0	0	0	0	0	0	0	0	0	0	0	0	0	0	1	0	0	0	0	D_0__Bacteria;D_1__Bacteroidetes;D_2__Bacteroidia;D_3__Chitinophagales;D_4__Chitinophagaceae;D_5__Niastella;D_6__Niastella yeongjuensis
db55af802ebbb509244a5c45e9dd080d	2	0	5	0	0	0	0	0	2	0	0	0	0	0	0	0	0	1	0	0	0	0	0	0	0	0	0	0	0	0	0	0	0	0	0	0	D_0__Bacteria;D_1__Proteobacteria;D_2__Deltaproteobacteria;D_3__Desulfarculales;D_4__Desulfarculaceae;D_5__uncultured;D_6__uncultured soil bacterium
c754aaacce6fc61a48f66de9cca6d7d6	0	0	0	0	0	0	0	0	1	0	1	1	0	0	0	0	0	0	0	0	0	1	0	0	0	2	0	0	0	0	1	0	0	0	0	3	D_0__Bacteria;D_1__Bacteroidetes;D_2__Bacteroidia;D_3__Chitinophagales;D_4__Chitinophagaceae
a6703ffaa1c637d17523042b489062f1	0	0	0	1	4	0	0	0	0	2	0	0	0	0	0	0	0	0	0	0	0	0	0	2	2	0	0	0	0	1	0	0	0	0	0	0	D_0__Bacteria;D_1__Gemmatimonadetes;D_2__Gemmatimonadetes;D_3__Gemmatimonadales;D_4__Gemmatimonadaceae
ad6cc695d060d848f7ebbedf106c1b64	0	0	0	0	0	0	1	0	0	0	0	0	0	0	0	0	2	0	0	0	2	2	0	0	2	1	0	0	1	1	0	1	0	0	0	0	D_0__Bacteria;D_1__Proteobacteria;D_2__Alphaproteobacteria;D_3__Dongiales;D_4__Dongiaceae;D_5__Dongia;D_6__Dongia sp. URHE0060
2f63f98a7038aa760b18d3e37378df9a	0	0	0	0	0	0	0	0	0	2	0	0	0	1	0	1	0	1	0	0	0	0	4	1	0	1	2	0	2	2	0	0	1	0	0	0	D_0__Bacteria;D_1__Bacteroidetes;D_2__Bacteroidia;D_3__Chitinophagales;D_4__Saprospiraceae;D_5__Phaeodactylibacter;D_6__uncultured Haliscomenobacter sp.
0ca9e19fb658f034a6a1ab10935e3559	3	6	2	2	3	3	3	4	2	3	4	2	2	0	0	3	3	0	0	5	3	1	0	0	5	0	3	3	2	2	0	0	1	0	5	1	D_0__Bacteria;D_1__Proteobacteria;D_2__Alphaproteobacteria;D_3__Elsterales;D_4__uncultured
34bbd7c377bc00630b608423c3d35698	1	0	1	1	1	0	0	0	0	0	0	0	2	0	0	1	2	0	0	2	0	0	0	0	0	0	1	3	3	0	0	4	1	0	0	0	D_0__Bacteria;D_1__Proteobacteria;D_2__Alphaproteobacteria;D_3__Elsterales;D_4__uncultured
183590fb0b6c19fb8fba865b87c4d826	0	1	0	0	0	0	0	0	1	0	1	0	0	0	0	0	0	0	0	0	0	0	0	0	0	0	0	0	0	0	0	0	0	0	0	0	D_0__Bacteria;D_1__Actinobacteria;D_2__Thermoleophilia;D_3__Gaiellales;D_4__uncultured;D_5__uncultured bacterium 5G12;D_6__uncultured bacterium 5G12
b73b512d38b28ac2637aaebb6f5e6f75	1	3	1	0	0	0	0	0	1	2	0	1	2	3	0	0	0	0	2	0	0	0	0	0	0	0	0	0	0	0	3	0	0	1	0	0	D_0__Bacteria;D_1__Acidobacteria;D_2__Acidobacteriia;D_3__Solibacterales;D_4__Solibacteraceae (Subgroup 3);D_5__Bryobacter;D_6__uncultured eubacterium WD254
90c7aed2e2320386049306f5214f5f43	0	0	0	0	0	0	0	0	0	0	0	0	0	0	0	0	0	0	0	0	0	0	0	0	0	0	1	0	0	0	0	0	0	0	4	0	D_0__Bacteria;D_1__Proteobacteria;D_2__Alphaproteobacteria;D_3__Rhizobiales;D_4__Rhizobiaceae;D_5__Allorhizobium-Neorhizobium-Pararhizobium-Rhizobium
8efa1e5b1c655cd6bcc812c413c3e098	0	2	0	0	0	0	0	0	1	0	0	0	0	0	3	1	0	0	0	2	0	1	0	0	0	0	0	0	0	0	1	0	0	0	0	0	D_0__Bacteria;D_1__Actinobacteria;D_2__Thermoleophilia;D_3__Gaiellales;D_4__Gaiellaceae;D_5__Gaiella
1389e86f9b599f0b40192f66803cd9a7	0	2	0	0	0	0	0	0	0	2	0	0	0	0	0	0	0	0	0	0	0	2	0	0	1	0	0	0	0	0	0	0	2	0	0	0	D_0__Bacteria;D_1__Proteobacteria;D_2__Alphaproteobacteria;D_3__Elsterales;D_4__uncultured;D_5__uncultured soil bacterium;D_6__uncultured soil bacterium
abcdf9f4a2656102cb0d69a3539eb7ed	0	1	0	0	0	1	0	0	0	0	1	0	0	0	0	0	0	0	0	0	0	0	0	0	0	0	0	0	0	0	0	0	0	0	0	0	D_0__Bacteria;D_1__Chloroflexi;D_2__KD4-96
c0d1f168144b281a6754cbc30bf90259	0	3	0	0	0	0	0	0	0	0	0	1	0	0	3	2	0	0	0	0	0	0	0	0	0	0	0	0	0	0	0	0	0	0	0	0	D_0__Bacteria;D_1__Bacteroidetes;D_2__Bacteroidia;D_3__Chitinophagales;D_4__uncultured;D_5__uncultured delta proteobacterium;D_6__uncultured delta proteobacterium
988bddc4679d9e5ca01acb9af4d6ed69	1	0	0	1	0	2	1	0	0	0	0	0	0	0	0	0	0	0	0	1	0	0	0	0	0	0	0	0	0	0	0	0	0	0	1	1	D_0__Bacteria;D_1__Bacteroidetes;D_2__Bacteroidia;D_3__Chitinophagales;D_4__Chitinophagaceae;D_5__Sediminibacterium
fd3b37edd428bc344f3303fa1b67457b	0	1	0	0	2	0	0	1	1	0	2	0	0	1	0	2	0	0	0	2	0	1	0	0	0	0	0	0	0	1	0	0	0	0	0	1	D_0__Bacteria;D_1__Actinobacteria;D_2__Thermoleophilia;D_3__Gaiellales;D_4__Gaiellaceae;D_5__Gaiella;D_6__uncultured organism
621a65ede0d445ab1c3188dd7f7d4055	0	0	0	0	0	0	0	0	0	0	0	0	0	0	0	1	0	0	0	0	0	0	0	0	0	0	0	0	0	0	2	0	0	2	2	2	D_0__Bacteria;D_1__Proteobacteria;D_2__Deltaproteobacteria;D_3__PB19;D_4__uncultured Desulfuromonadales bacterium;D_5__uncultured Desulfuromonadales bacterium;D_6__uncultured Desulfuromonadales bacterium
aaaf51dd7f37c7c97bdea034f2c933f5	0	0	0	0	0	0	0	1	0	0	0	1	0	0	0	0	0	0	0	0	0	0	0	0	0	0	0	0	0	0	0	0	0	0	0	0	D_0__Bacteria;D_1__Proteobacteria;D_2__Gammaproteobacteria;D_3__Betaproteobacteriales;D_4__SC-I-84;D_5__beta proteobacterium JGI 0001003-N18;D_6__beta proteobacterium JGI 0001003-N18
6dd21e6933478918c96afe8e1c88dc29	4	6	4	6	3	4	4	2	4	2	0	1	6	2	0	0	7	0	8	2	1	2	0	4	0	2	3	2	1	0	2	6	3	1	5	1	D_0__Bacteria;D_1__Verrucomicrobia;D_2__Verrucomicrobiae;D_3__Pedosphaerales;D_4__Pedosphaeraceae;D_5__ADurb.Bin063-1;D_6__bacterium Ellin5102
ceda5b978695ce2ea48eb27032241d42	1	0	0	1	1	0	0	0	0	0	0	0	0	0	0	0	0	0	0	0	0	0	0	1	0	0	0	0	0	0	0	0	0	0	0	0	D_0__Bacteria;D_1__Proteobacteria;D_2__Gammaproteobacteria;D_3__Betaproteobacteriales;D_4__Nitrosomonadaceae;D_5__Ellin6067
52ed4d92f2b0da0d4355871f7a5042d5	0	0	0	0	0	0	0	0	0	0	1	0	0	0	0	0	0	0	0	0	0	0	0	0	2	0	0	0	1	0	0	0	0	0	0	0	D_0__Bacteria;D_1__Proteobacteria;D_2__Gammaproteobacteria;D_3__Betaproteobacteriales
e374468f5c32f059511b6fb598e9189c	0	0	0	0	0	0	0	0	0	0	0	0	0	0	0	0	0	0	0	2	0	1	0	0	0	0	2	0	0	0	0	0	0	3	2	0	D_0__Bacteria
505b2394348fa4b151714258609520f2	1	1	3	2	3	0	2	1	1	6	3	4	2	0	0	0	2	5	4	1	3	3	7	2	0	0	0	2	0	0	0	2	0	2	2	1	D_0__Bacteria;D_1__Proteobacteria;D_2__Alphaproteobacteria
8a8fe3f20acc61ca98c8e9b4dee1a074	2	0	2	0	0	0	0	2	0	4	5	0	1	1	1	0	0	0	1	0	0	2	3	0	0	0	2	2	0	2	0	2	0	4	0	2	D_0__Bacteria;D_1__Proteobacteria;D_2__Deltaproteobacteria;D_3__NB1-j;D_4__uncultured Desulfoglaeba sp.;D_5__uncultured Desulfoglaeba sp.;D_6__uncultured Desulfoglaeba sp.
a9ab6ee05593a9953d5ca413f8ca30e5	3	3	1	4	0	1	2	0	5	0	3	0	0	0	0	2	0	0	0	0	0	2	0	2	1	0	0	0	0	0	1	1	4	0	2	2	D_0__Bacteria;D_1__Proteobacteria;D_2__Gammaproteobacteria;D_3__Gammaproteobacteria Incertae Sedis;D_4__Unknown Family;D_5__Acidibacter;D_6__uncultured Steroidobacter sp.
0efc7fbfda20d1291310f6effe45690c	0	0	2	0	3	2	2	1	1	0	2	0	1	0	0	0	3	2	0	0	0	0	1	1	0	0	0	0	0	0	2	0	0	2	0	0	D_0__Bacteria;D_1__Proteobacteria;D_2__Deltaproteobacteria;D_3__Desulfarculales;D_4__Desulfarculaceae;D_5__uncultured
ed8c53e4fd5d268beeac785430e5e1e3	1	2	0	0	3	0	2	0	0	0	1	0	0	0	0	0	0	0	0	0	0	1	0	0	0	0	1	0	0	0	0	0	0	0	0	0	D_0__Bacteria;D_1__Acidobacteria;D_2__Holophagae;D_3__Subgroup 7;D_4__uncultured Desulfovirga sp.;D_5__uncultured Desulfovirga sp.;D_6__uncultured Desulfovirga sp.
019bcba2e4e3860ee0c66b11daaec600	0	1	0	0	0	0	0	0	3	0	0	0	2	2	1	0	0	4	2	1	1	1	1	0	0	4	0	1	0	2	0	0	0	2	2	0	D_0__Bacteria;D_1__Gemmatimonadetes;D_2__Gemmatimonadetes;D_3__Gemmatimonadales;D_4__Gemmatimonadaceae;D_5__Gemmatimonas
84bfca84d86460991f8603870960193a	0	2	0	1	0	1	2	2	0	1	0	0	1	0	0	0	0	0	2	0	0	0	0	1	0	0	3	2	0	0	0	0	0	1	0	1	D_0__Bacteria;D_1__Acidobacteria;D_2__Subgroup 5;D_3__uncultured Holophaga sp.;D_4__uncultured Holophaga sp.;D_5__uncultured Holophaga sp.;D_6__uncultured Holophaga sp.
608ad041b253d1abd80459456a94a849	0	0	0	0	3	0	2	0	1	0	0	0	0	0	0	3	1	0	0	0	0	1	2	1	5	0	1	0	0	0	7	1	1	2	0	0	D_0__Bacteria;D_1__Proteobacteria;D_2__Alphaproteobacteria;D_3__Rhizobiales;D_4__Devosiaceae;D_5__Devosia
0c0fd046943dba69b3afd08a1ae74470	0	1	1	0	0	0	0	0	0	0	0	0	0	0	0	0	0	1	0	0	0	0	0	0	0	0	0	0	0	0	1	1	0	0	0	0	D_0__Bacteria;D_1__Acidobacteria;D_2__Acidobacteriia;D_3__Solibacterales;D_4__Solibacteraceae (Subgroup 3)
5fd43551b75118a11ef35a568ef5dbca	0	0	0	0	0	0	0	0	0	0	0	0	0	0	0	0	0	1	0	0	0	0	0	0	0	0	0	0	0	0	0	0	0	0	0	0	D_0__Bacteria;D_1__Bacteroidetes;D_2__Bacteroidia;D_3__Cytophagales
342b7b33616dd6ddf5d8b2d22f0d2b65	0	0	0	0	0	0	0	0	0	0	3	0	0	0	0	0	0	0	0	1	0	3	0	0	0	0	2	0	0	0	0	1	0	0	0	2	D_0__Bacteria;D_1__Proteobacteria;D_2__Deltaproteobacteria;D_3__Myxococcales;D_4__Haliangiaceae;D_5__Haliangium;D_6__myxobacterium AT3-03
69f227022d5ab715324664b292f2ad0b	0	0	1	0	1	0	0	1	0	2	0	0	0	0	0	0	0	0	0	0	0	0	0	0	0	0	0	0	0	0	0	2	0	0	0	0	D_0__Bacteria;D_1__Rokubacteria;D_2__NC10;D_3__Rokubacteriales;D_4__uncultured soil bacterium;D_5__uncultured soil bacterium;D_6__uncultured soil bacterium
af7c7c6bb9936f1263316eb06cf3dd3c	0	0	0	1	0	0	0	1	0	0	0	0	0	0	0	0	0	0	0	0	0	0	0	0	0	0	4	0	0	0	0	0	0	0	2	1	D_0__Bacteria;D_1__Chloroflexi;D_2__OLB14;D_3__bacterium SCGC AG-212-C10;D_4__bacterium SCGC AG-212-C10;D_5__bacterium SCGC AG-212-C10;D_6__bacterium SCGC AG-212-C10
1ca7e69c9a0852fb7e92b56365806f41	0	0	0	1	0	0	0	0	0	2	0	0	0	0	0	0	0	0	0	1	3	0	0	0	0	1	3	1	0	0	2	2	0	0	1	0	D_0__Bacteria;D_1__Acidobacteria;D_2__Subgroup 6
9ffeb770c8b473d2780ebdf823c52f3d	0	0	0	0	0	0	0	0	0	0	0	0	0	0	0	0	0	0	0	0	0	2	0	0	0	2	0	1	0	2	0	5	4	1	0	1	D_0__Bacteria;D_1__Acidobacteria;D_2__Subgroup 6
05218c5a4bf0537751903942723fed46	0	0	0	0	0	0	0	0	3	0	1	0	1	0	0	0	0	1	0	0	0	0	2	0	0	0	1	0	0	0	0	0	1	0	0	0	D_0__Bacteria;D_1__Acidobacteria;D_2__Subgroup 6
7f5c32eaad68ff7c2b55c152bb8003c0	0	0	0	1	0	0	0	0	0	0	0	0	0	0	1	0	0	0	0	0	0	0	0	0	0	0	0	0	0	0	1	0	1	0	0	0	D_0__Bacteria;D_1__Bacteroidetes;D_2__Bacteroidia;D_3__Chitinophagales;D_4__Chitinophagaceae
ec21c4bcceaa1de8340aef4a9ba9cb88	2	2	4	2	4	0	0	0	0	2	0	0	3	3	0	0	3	0	4	7	3	2	0	0	2	0	3	9	2	4	11	6	0	9	14	16	D_0__Bacteria
23c68864514845abab937e205bb19ff8	0	2	0	2	0	0	0	0	0	0	0	0	0	0	0	0	0	0	0	0	0	0	0	0	0	0	0	0	0	0	0	0	0	0	1	0	D_0__Bacteria;D_1__Verrucomicrobia;D_2__Verrucomicrobiae;D_3__Verrucomicrobiales;D_4__Rubritaleaceae;D_5__Luteolibacter
cb2f8f8dc7bf2a6f6eff853bf49cf435	0	0	0	1	0	0	0	0	0	0	0	0	0	0	0	0	0	0	0	0	0	0	1	0	0	0	0	1	0	1	1	0	0	4	0	0	D_0__Bacteria;D_1__Bacteroidetes;D_2__Bacteroidia;D_3__Flavobacteriales;D_4__Flavobacteriaceae;D_5__Flavobacterium
50f5266771225509edda5a1219cfa61d	0	0	0	0	0	0	0	0	0	0	0	0	0	0	0	0	0	0	4	2	0	0	1	1	0	0	1	0	0	0	0	0	0	0	0	0	D_0__Bacteria;D_1__Acidobacteria;D_2__Blastocatellia (Subgroup 4);D_3__Blastocatellales;D_4__Blastocatellaceae
b7af1cf215748e5cbc7229dd8c79301b	0	0	1	2	0	0	0	1	0	0	0	0	0	0	0	0	0	0	0	2	1	0	0	0	1	0	0	2	0	0	0	0	0	0	0	0	D_0__Bacteria;D_1__Actinobacteria;D_2__Thermoleophilia;D_3__Solirubrobacterales;D_4__67-14;D_5__uncultured Conexibacteraceae bacterium;D_6__uncultured Conexibacteraceae bacterium
ca80fae3b4e9544e92689230c0682a84	0	0	0	0	0	0	0	0	0	0	0	0	0	0	0	0	0	0	0	0	0	0	0	0	0	0	0	0	0	0	0	1	0	0	0	0	D_0__Bacteria;D_1__Proteobacteria;D_2__Gammaproteobacteria
b85f5ff7f9724dae0a04b70081f91f94	0	0	0	0	0	0	0	0	0	0	0	0	0	0	0	0	0	0	0	0	0	0	0	0	7	0	0	0	0	2	0	0	0	0	0	0	D_0__Bacteria;D_1__Bacteroidetes;D_2__Bacteroidia;D_3__Flavobacteriales;D_4__Flavobacteriaceae;D_5__Flavobacterium
b3b639ab34728ff3a78a2f0055a7e35d	2	0	5	0	0	1	0	1	0	1	0	0	0	0	0	0	0	2	0	0	0	0	0	0	0	0	0	0	0	0	0	0	0	0	0	2	D_0__Bacteria;D_1__Proteobacteria;D_2__Gammaproteobacteria;D_3__Xanthomonadales;D_4__Xanthomonadaceae;D_5__Arenimonas
39fd1ede2181c14b2f0b6984d61ae9c2	3	0	4	0	0	0	2	0	0	5	4	0	0	3	0	0	3	0	0	0	0	0	0	0	0	1	0	0	1	0	0	0	0	0	0	0	D_0__Bacteria;D_1__Patescibacteria;D_2__Saccharimonadia;D_3__Saccharimonadales
c156807a20a52046684ef664f0550b6f	0	4	0	0	0	0	0	0	0	0	0	0	0	0	1	0	0	0	1	0	0	2	0	0	1	0	6	0	2	3	0	0	0	0	0	0	D_0__Bacteria;D_1__Chloroflexi;D_2__OLB14
077c17f08ae3f6cc59732475abbd86b2	0	0	0	0	0	0	0	0	0	0	0	0	0	0	0	0	0	0	0	0	0	0	0	0	0	5	0	0	0	0	1	0	0	0	0	0	D_0__Bacteria;D_1__Proteobacteria;D_2__Deltaproteobacteria;D_3__Myxococcales;D_4__Haliangiaceae;D_5__Haliangium;D_6__uncultured sludge bacterium A9
8787877fe6f2fd2091d54b11f75a92a5	0	0	0	0	0	0	0	0	0	0	0	0	2	0	0	2	0	0	0	0	0	0	0	0	2	1	0	0	2	3	0	0	0	0	0	0	D_0__Bacteria;D_1__Chloroflexi;D_2__Ktedonobacteria;D_3__Ktedonobacterales;D_4__JG30-KF-AS9;D_5__uncultured soil bacterium;D_6__uncultured soil bacterium
b1f914919c690e730652b29791d65b24	1	1	0	0	0	0	0	0	0	1	0	1	0	0	0	0	0	0	2	0	0	0	0	0	2	3	0	0	0	0	1	0	0	0	2	0	D_0__Bacteria;D_1__Bacteroidetes;D_2__Bacteroidia;D_3__Cytophagales;D_4__Microscillaceae;D_5__uncultured;D_6__Bacteroidetes bacterium N2
ea7f0caef1c1b23213a947268d3b17f6	0	0	0	0	0	0	0	0	0	0	0	0	2	0	0	0	0	0	0	6	0	2	0	0	2	0	0	0	0	0	0	0	3	1	0	0	D_0__Bacteria;D_1__Proteobacteria;D_2__Deltaproteobacteria;D_3__Myxococcales;D_4__Archangiaceae;D_5__Anaeromyxobacter
a5b4df0b94e1907108f1483b22bb24ad	2	1	2	0	1	0	0	0	0	0	0	0	0	0	0	0	0	0	0	0	0	2	0	0	0	0	0	0	0	0	0	2	0	0	0	0	D_0__Bacteria;D_1__Proteobacteria;D_2__Deltaproteobacteria;D_3__RCP2-54
c4c4445ad544d20df19c907dc1467cd8	0	0	0	2	0	4	0	0	0	0	3	2	0	0	0	3	0	0	5	0	0	0	0	0	0	2	0	0	0	0	0	0	0	0	0	3	D_0__Bacteria
690270441587506838d4ad7bdc5a0c49	2	0	0	0	0	0	0	0	6	0	0	0	0	1	2	3	3	0	0	2	0	0	2	0	0	2	0	0	0	0	2	4	0	0	2	2	D_0__Bacteria;D_1__Acidobacteria;D_2__Acidobacteriia;D_3__Solibacterales;D_4__Solibacteraceae (Subgroup 3);D_5__Bryobacter
91c6cff88bc686ca53410f1cc663dd41	3	0	5	0	0	0	0	0	0	0	0	0	0	0	0	0	0	0	0	1	0	0	0	0	0	0	0	0	0	0	0	0	0	0	0	0	D_0__Bacteria;D_1__Proteobacteria;D_2__Alphaproteobacteria;D_3__Dongiales;D_4__Dongiaceae;D_5__Dongia;D_6__Dongia mobilis
cea00be88e05f5689af944a4d8473a3b	0	0	4	1	7	2	1	0	0	0	2	0	1	0	0	0	0	0	4	2	3	2	0	2	0	3	0	0	0	0	0	0	1	0	0	0	D_0__Bacteria;D_1__Proteobacteria;D_2__Alphaproteobacteria;D_3__Dongiales;D_4__Dongiaceae;D_5__Dongia
a1dbb8276cf7d9d7ad3160fef08dfb4a	2	1	0	3	4	0	0	6	1	0	2	0	4	0	13	9	7	0	2	8	1	3	0	7	0	2	5	6	1	6	1	0	0	1	2	0	D_0__Bacteria;D_1__Chloroflexi;D_2__AD3
d1b87fa9052ce0fbb5ff68fb6e48ccd3	0	0	0	0	0	2	0	0	0	0	0	0	2	0	0	0	0	0	0	1	0	0	0	0	0	0	0	0	1	0	0	0	0	0	0	0	D_0__Bacteria
3e753f42b66bace5889470933b03359f	0	2	0	0	0	0	0	0	1	0	1	0	4	3	4	3	0	0	0	4	2	2	5	3	2	0	0	4	2	7	1	0	0	0	2	0	D_0__Bacteria;D_1__Chloroflexi;D_2__KD4-96;D_3__uncultured Longilinea sp.;D_4__uncultured Longilinea sp.;D_5__uncultured Longilinea sp.;D_6__uncultured Longilinea sp.
e6b50c86d0b30ae2f99582644a32731b	0	0	0	0	0	0	0	3	0	0	1	0	0	0	0	0	0	0	0	0	0	0	0	0	0	0	0	0	0	0	0	0	0	0	0	0	D_0__Bacteria;D_1__Firmicutes;D_2__Clostridia;D_3__Clostridiales;D_4__Lachnospiraceae;D_5__Tyzzerella 4
160ae325a8fe471a293ea8161a4d7254	4	0	0	0	0	0	0	0	0	0	0	0	0	2	0	0	0	0	2	0	0	0	0	0	2	0	0	0	0	0	0	0	0	0	0	0	D_0__Bacteria;D_1__Proteobacteria;D_2__Alphaproteobacteria;D_3__Caulobacterales;D_4__Caulobacteraceae;D_5__Caulobacter
045b0732858a3e20c40b853906002b16	0	0	0	0	1	0	0	0	0	1	0	3	4	0	0	0	1	0	0	0	4	0	1	0	0	0	0	0	1	1	0	0	1	1	0	0	D_0__Bacteria;D_1__Proteobacteria;D_2__Deltaproteobacteria
81e1555675a887671a8e7a604543dc3a	0	0	2	0	3	0	0	0	0	0	0	0	0	0	2	0	0	0	0	0	0	0	0	0	0	0	0	0	0	0	1	0	0	0	1	0	D_0__Bacteria;D_1__Proteobacteria;D_2__Alphaproteobacteria;D_3__Rhizobiales;D_4__Devosiaceae;D_5__Devosia
a16e2b220144f43ccebd1659cf63916c	5	8	7	4	1	11	7	0	1	8	3	3	0	0	0	0	2	1	2	0	0	8	0	1	0	0	0	3	0	0	6	11	9	9	6	2	D_0__Bacteria;D_1__Latescibacteria
553234e59d49989a54570a089a5a7697	18	24	15	9	8	36	21	3	2	8	25	12	4	2	2	0	37	2	36	5	4	18	6	7	4	26	30	8	33	9	9	6	23	6	10	1	D_0__Bacteria;D_1__Acidobacteria;D_2__Subgroup 6;D_3__Acidobacteria bacterium SCN 69-37;D_4__Acidobacteria bacterium SCN 69-37;D_5__Acidobacteria bacterium SCN 69-37;D_6__Acidobacteria bacterium SCN 69-37
b415d56bce2e9980c66c6f409c8671f6	0	2	0	6	2	0	0	0	0	0	0	0	0	0	0	0	0	0	0	0	0	0	0	0	0	0	0	0	0	0	0	0	0	0	0	0	D_0__Bacteria;D_1__Fibrobacteres;D_2__Fibrobacteria;D_3__Fibrobacterales;D_4__Fibrobacteraceae;D_5__possible genus 04;D_6__Juncus effusus
4dd461ac01f84ca035953e7dbd754d29	0	0	1	0	0	0	0	0	0	0	0	1	0	0	0	0	0	0	0	0	0	1	0	0	0	0	0	0	0	0	0	1	0	2	0	0	D_0__Bacteria;D_1__Acidobacteria;D_2__Acidobacteriia;D_3__Acidobacteriales;D_4__uncultured;D_5__Acidobacteria bacterium LWQ13;D_6__Acidobacteria bacterium LWQ13
9130dd0da6f8f682dc5a838e3214826c	0	0	0	0	0	0	0	0	0	0	1	1	0	0	0	0	0	0	0	0	0	0	2	0	0	0	1	0	0	0	0	0	0	0	0	0	D_0__Bacteria;D_1__Proteobacteria;D_2__Alphaproteobacteria
ad960770376259e272459818d7337646	2	1	0	3	0	1	0	0	0	0	2	0	0	0	0	0	0	0	0	0	0	0	0	0	0	0	1	0	0	0	0	0	1	0	0	0	D_0__Bacteria;D_1__Acidobacteria;D_2__Acidobacteriia;D_3__Acidobacteriales;D_4__Acidobacteriaceae (Subgroup 1)
f26b834c0a43743ab096a3ae16ebb233	1	0	7	0	0	2	0	0	0	2	3	1	0	9	2	0	0	11	0	2	2	0	0	0	2	7	3	2	5	0	3	2	5	0	3	0	D_0__Bacteria;D_1__Proteobacteria;D_2__Deltaproteobacteria;D_3__Myxococcales;D_4__Sandaracinaceae
04f2ef7e331664b96377c27a24811b5e	0	0	0	0	0	1	1	1	0	0	2	2	1	0	0	0	0	0	2	0	0	2	0	1	0	0	0	0	0	0	0	0	0	0	0	0	D_0__Bacteria;D_1__Actinobacteria;D_2__Actinobacteria;D_3__Micromonosporales;D_4__Micromonosporaceae
b4c600578ed27a3966f9e673f4bb7313	0	0	0	0	0	0	0	0	0	0	0	0	0	2	1	0	0	0	0	0	4	0	0	0	0	0	0	0	0	0	0	0	0	0	0	0	D_0__Bacteria;D_1__Proteobacteria;D_2__Gammaproteobacteria;D_3__Betaproteobacteriales;D_4__Nitrosomonadaceae;D_5__Ellin6067
1204521bfe1c287ef6efcd3662f946e4	9	2	2	3	22	2	78	2	1	1	8	6	0	2	6	3	5	2	0	0	0	12	4	1	9	6	3	5	7	15	6	3	3	0	4	17	D_0__Bacteria;D_1__Proteobacteria;D_2__Alphaproteobacteria;D_3__Rhizobiales;D_4__Rhizobiaceae;D_5__Allorhizobium-Neorhizobium-Pararhizobium-Rhizobium
0810deb46435676a45373e90612d143f	3	2	0	2	2	0	2	6	2	9	1	4	1	2	0	0	0	3	0	0	0	1	0	0	0	0	0	0	0	0	3	3	1	9	1	8	D_0__Bacteria;D_1__Proteobacteria;D_2__Deltaproteobacteria;D_3__Myxococcales;D_4__Polyangiaceae;D_5__Pajaroellobacter
3ee784e090b1ea2ccd66c4620ad097a8	0	0	0	0	2	0	2	0	5	1	1	0	2	4	2	0	8	0	0	0	2	0	1	5	7	3	0	0	0	3	0	0	0	0	0	0	D_0__Bacteria;D_1__Acidobacteria;D_2__Acidobacteriia;D_3__Solibacterales;D_4__Solibacteraceae (Subgroup 3);D_5__Candidatus Solibacter;D_6__uncultured Acidobacteriaceae bacterium
2a601bf4c1db51606d4a1b855d7d16f8	0	0	0	0	0	0	0	0	0	2	0	1	0	0	0	0	0	0	0	0	0	0	0	0	0	0	0	0	0	0	0	0	0	0	0	2	D_0__Bacteria;D_1__Acidobacteria;D_2__Acidobacteriia;D_3__Solibacterales;D_4__Solibacteraceae (Subgroup 3);D_5__Candidatus Solibacter;D_6__Candidatus Solibacter usitatus Ellin6076
e7716b243bbdfb8aa2fb61743706ef0b	1	1	5	3	2	3	1	1	3	3	4	3	0	0	0	0	0	0	1	0	0	0	0	0	0	1	0	0	1	0	1	1	3	0	0	2	D_0__Bacteria;D_1__Proteobacteria;D_2__Gammaproteobacteria;D_3__Betaproteobacteriales;D_4__TRA3-20
35a86ffbd396caa27acc4bf6c0aba628	0	2	1	0	0	0	2	1	0	0	2	0	0	0	0	0	4	1	2	0	2	9	0	0	0	0	2	0	2	0	0	3	0	2	1	0	D_0__Bacteria;D_1__Acidobacteria;D_2__Subgroup 22;D_3__uncultured Holophaga sp.;D_4__uncultured Holophaga sp.;D_5__uncultured Holophaga sp.;D_6__uncultured Holophaga sp.
ab1f9dd2c63067c3eb7013c34722e60f	0	0	1	0	0	0	0	0	0	0	0	0	0	0	0	0	2	0	0	0	0	0	0	0	0	1	2	2	0	0	0	0	0	0	0	0	D_0__Bacteria;D_1__Acidobacteria;D_2__Acidobacteriia;D_3__Solibacterales;D_4__Solibacteraceae (Subgroup 3);D_5__Bryobacter;D_6__uncultured eubacterium WD254
cf660cba6d604cb5f565f765f42955e4	0	0	0	0	0	0	0	0	0	2	0	0	2	1	2	1	0	1	0	2	0	0	3	1	2	0	0	2	1	0	0	0	0	0	0	0	D_0__Bacteria;D_1__Actinobacteria;D_2__Thermoleophilia;D_3__Gaiellales
ab798e129d6a2cbfc76ca5bb14ce3468	0	0	0	0	0	0	0	0	0	0	0	0	0	0	0	0	0	0	0	0	0	0	0	0	0	0	0	2	0	0	0	1	0	0	2	0	D_0__Bacteria;D_1__Bacteroidetes;D_2__Bacteroidia;D_3__Chitinophagales;D_4__Chitinophagaceae;D_5__Niastella
8412fae33382ed019dee54c1f43ae27b	0	0	0	4	0	0	0	0	1	0	0	0	0	0	0	0	0	0	0	0	0	1	0	0	0	0	0	0	0	0	2	0	0	0	0	1	D_0__Bacteria;D_1__Acidobacteria;D_2__Acidobacteriia;D_3__Solibacterales;D_4__Solibacteraceae (Subgroup 3);D_5__Candidatus Solibacter
c743269a14f292be37721109cda8c62e	0	0	0	0	0	0	0	0	0	0	0	0	0	0	0	1	0	0	0	0	0	0	0	0	0	1	1	0	0	0	0	0	0	0	0	0	D_0__Bacteria;D_1__Acidobacteria;D_2__Acidobacteriia;D_3__Acidobacteriales;D_4__uncultured
f3110953a47a4f03ec8399804b669561	0	0	0	0	0	0	0	1	0	2	1	3	0	0	0	0	0	0	0	0	0	0	0	0	0	0	0	0	0	0	1	0	0	2	1	4	D_0__Bacteria;D_1__Gemmatimonadetes;D_2__Gemmatimonadetes;D_3__Gemmatimonadales;D_4__Gemmatimonadaceae;D_5__Gemmatimonas
b13e13976aafbe5a376b681d3922895f	1	0	0	0	0	0	0	0	0	0	0	0	4	1	6	2	2	0	7	2	2	1	4	1	0	1	3	2	1	3	0	0	0	0	0	0	D_0__Bacteria;D_1__Proteobacteria;D_2__Alphaproteobacteria;D_3__Sphingomonadales;D_4__Sphingomonadaceae;D_5__Sphingomonas
95b29340f2a26627b671b92868d30598	0	0	0	0	0	0	0	0	0	0	0	0	0	0	0	0	0	0	0	0	0	0	0	0	0	0	0	0	0	0	0	0	0	0	2	0	D_0__Bacteria;D_1__Firmicutes;D_2__Bacilli;D_3__Bacillales;D_4__Paenibacillaceae;D_5__Paenibacillus
eeea15e05c481dd830f7d9f69d0aad10	0	0	0	0	0	0	0	0	0	0	3	2	0	0	0	0	0	1	0	0	1	0	0	0	0	0	1	0	2	0	3	0	0	0	1	0	D_0__Bacteria;D_1__Firmicutes;D_2__Clostridia;D_3__Clostridiales;D_4__Lachnospiraceae;D_5__[Ruminococcus] torques group
30aa104403433839a44d62708dd9c24d	0	0	0	0	0	0	0	0	0	0	0	0	3	0	0	0	2	0	0	0	2	0	2	0	0	2	0	3	0	0	0	0	0	1	0	1	D_0__Bacteria;D_1__Proteobacteria;D_2__Gammaproteobacteria;D_3__Betaproteobacteriales;D_4__SC-I-84
fcac6d140c9339d7f393b0baacf62bd1	0	1	0	0	0	0	0	0	0	0	0	0	2	2	0	0	3	2	1	0	0	0	1	7	0	0	3	0	1	2	0	0	0	0	0	0	D_0__Bacteria;D_1__Proteobacteria;D_2__Gammaproteobacteria;D_3__Xanthomonadales;D_4__Rhodanobacteraceae
4ab39db9416b1d8c99b77b3684d95b29	0	0	0	0	0	0	0	0	0	0	0	0	4	5	0	0	0	0	0	0	0	1	0	0	1	0	0	2	0	0	0	0	0	0	0	0	D_0__Bacteria;D_1__Proteobacteria;D_2__Gammaproteobacteria;D_3__Betaproteobacteriales
0750523c35d81a70020f1afe79121f95	0	0	0	0	0	0	1	0	0	0	0	2	0	0	0	3	0	4	0	0	1	0	0	0	0	0	0	5	0	3	4	0	0	1	1	0	D_0__Bacteria;D_1__Patescibacteria;D_2__Saccharimonadia;D_3__Saccharimonadales;D_4__bacterium LWQ8;D_5__bacterium LWQ8;D_6__bacterium LWQ8
e763ad8c71aa391e7a2d848ac4e79fa4	0	0	0	0	0	0	0	1	0	1	0	0	0	0	0	0	0	1	0	0	0	0	0	0	0	0	0	0	0	0	0	0	0	0	0	0	D_0__Bacteria;D_1__Proteobacteria;D_2__Gammaproteobacteria;D_3__Xanthomonadales;D_4__Xanthomonadaceae;D_5__Stenotrophomonas
f19d8c89a841f51581b6f639b697fc0d	20	32	18	13	19	23	9	8	14	16	7	9	18	13	11	11	31	13	49	22	29	17	18	43	8	11	16	8	5	8	11	26	14	8	11	6	D_0__Bacteria;D_1__Proteobacteria;D_2__Alphaproteobacteria;D_3__uncultured;D_4__alpha proteobacterium LWH5;D_5__alpha proteobacterium LWH5;D_6__alpha proteobacterium LWH5
2dde1e866b13ca98ea227970b9e3f247	0	2	0	0	0	0	0	0	0	0	0	0	0	0	0	0	0	0	0	0	2	0	0	0	0	0	0	0	0	0	0	0	0	0	0	0	D_0__Bacteria;D_1__Acidobacteria;D_2__Thermoanaerobaculia;D_3__Thermoanaerobaculales;D_4__Thermoanaerobaculaceae;D_5__Subgroup 10
88d1a22dea35888451168b1bbd9f5b0a	0	1	0	0	0	0	0	0	0	2	0	0	0	0	0	0	0	0	3	1	0	0	0	0	0	0	0	3	0	0	0	1	0	0	2	2	D_0__Bacteria;D_1__Acidobacteria;D_2__Subgroup 22
89f9846f9d27d0e0133f0ce1a82dc597	0	3	5	2	0	1	4	0	0	3	1	1	0	0	0	0	0	0	0	0	0	0	0	0	0	0	0	0	0	0	1	3	0	0	2	0	D_0__Bacteria;D_1__Acidobacteria;D_2__Holophagae;D_3__Subgroup 7;D_4__uncultured Desulfovirga sp.;D_5__uncultured Desulfovirga sp.;D_6__uncultured Desulfovirga sp.
df2db539e72b96f64b1393520f6098c2	2	0	2	3	1	1	0	1	0	0	0	0	0	0	0	0	4	0	0	0	0	0	0	2	0	0	2	0	0	0	0	2	1	0	2	0	D_0__Bacteria;D_1__Bacteroidetes;D_2__Bacteroidia;D_3__Chitinophagales;D_4__Chitinophagaceae;D_5__uncultured;D_6__Chitinophaga sp. BN130233
8f9f9670a9d5f22e8648f2bf498be54e	0	0	0	0	0	0	0	0	0	0	0	0	0	0	0	0	2	0	0	0	1	0	2	1	0	1	0	0	0	2	0	0	0	0	0	0	D_0__Bacteria;D_1__Gemmatimonadetes;D_2__Gemmatimonadetes;D_3__Gemmatimonadales;D_4__Gemmatimonadaceae;D_5__Gemmatimonas;D_6__Gemmatimonadetes bacterium Ellin7146
c0e14b03dc0ba41d29e20b4547ee6eaf	0	1	0	0	0	0	0	0	0	0	0	0	0	0	0	0	0	0	0	0	0	0	0	0	0	0	0	0	0	0	0	2	1	0	0	3	D_0__Bacteria;D_1__Actinobacteria;D_2__Acidimicrobiia;D_3__uncultured
78bc13799c28b8be16fc18a12152b4a4	0	0	0	0	0	0	0	0	1	0	0	0	0	0	2	3	0	0	0	0	0	0	0	0	2	0	0	0	0	3	0	0	0	2	0	0	D_0__Bacteria;D_1__Chloroflexi;D_2__AD3
82e76208cb61879e995f888a183a4d02	2	0	3	0	1	3	0	0	1	2	1	0	0	0	0	0	2	1	0	0	0	1	0	0	0	0	0	0	0	0	0	0	2	0	0	0	D_0__Bacteria;D_1__Acidobacteria;D_2__Subgroup 6
513e0ee604ebd9eb34c74b272149668a	0	0	0	0	0	0	0	0	0	0	0	0	0	0	0	0	0	0	0	0	0	0	0	0	0	0	0	0	0	0	2	8	0	0	0	0	D_0__Bacteria
04afaeacf7c67cbbb672315ad06340a8	0	1	0	0	0	0	0	0	0	0	1	0	0	0	0	0	0	1	0	0	0	0	0	0	0	4	0	0	0	0	1	0	1	1	0	3	D_0__Bacteria;D_1__Proteobacteria;D_2__Alphaproteobacteria;D_3__Rhodospirillales;D_4__uncultured;D_5__uncultured Rhodospirillaceae bacterium;D_6__uncultured Rhodospirillaceae bacterium
07a8f3f464e1c6bb899308bcc85e5a1f	0	1	0	0	0	0	0	0	1	0	0	0	0	0	1	6	1	0	0	0	0	1	0	0	1	0	1	2	1	3	0	0	0	0	0	2	D_0__Bacteria;D_1__Actinobacteria;D_2__Thermoleophilia;D_3__Gaiellales;D_4__uncultured;D_5__bacterium Ellin7530;D_6__bacterium Ellin7530
2341b6e6e4e8c579fae7586c2a9b30dc	0	0	0	0	1	0	0	0	0	0	0	2	0	0	0	0	0	0	0	0	0	0	0	0	0	0	0	0	0	0	0	0	0	0	0	0	D_0__Bacteria;D_1__Chloroflexi;D_2__JG30-KF-CM66;D_3__uncultured Armatimonadetes bacterium;D_4__uncultured Armatimonadetes bacterium;D_5__uncultured Armatimonadetes bacterium;D_6__uncultured Armatimonadetes bacterium
d0f32cec9cac72a1de3c90f44615b4e0	0	0	0	0	1	0	0	0	2	1	2	0	3	6	0	0	0	5	0	0	2	1	0	0	0	0	0	2	0	0	0	0	0	0	0	0	D_0__Bacteria;D_1__Proteobacteria;D_2__Deltaproteobacteria;D_3__NB1-j;D_4__uncultured Desulfoglaeba sp.;D_5__uncultured Desulfoglaeba sp.;D_6__uncultured Desulfoglaeba sp.
b652512043f5d67e43950876697de0f2	0	1	0	1	0	1	0	0	0	0	0	0	0	0	0	0	0	0	0	0	0	1	0	0	0	0	0	0	0	0	1	0	0	1	0	0	D_0__Bacteria;D_1__Acidobacteria;D_2__Acidobacteriia;D_3__Solibacterales;D_4__Solibacteraceae (Subgroup 3);D_5__Candidatus Solibacter
cd1c65963d51bb3aa0a0dd91934dbfd3	0	0	0	0	0	0	0	0	2	0	0	0	0	1	0	0	0	0	0	0	3	0	0	0	2	0	0	2	0	0	1	0	0	0	0	0	D_0__Bacteria;D_1__Proteobacteria;D_2__Alphaproteobacteria;D_3__Elsterales;D_4__uncultured;D_5__Acetobacteraceae bacterium WX59;D_6__Acetobacteraceae bacterium WX59
dea55654d4e902f1f06a99009b339209	1	0	0	0	0	0	0	0	0	0	0	0	0	0	0	0	0	0	0	0	1	0	2	2	0	0	0	0	0	0	0	0	0	0	0	0	D_0__Bacteria;D_1__Actinobacteria;D_2__Acidimicrobiia;D_3__IMCC26256;D_4__bacterium enrichment culture clone auto8_4W;D_5__bacterium enrichment culture clone auto8_4W;D_6__bacterium enrichment culture clone auto8_4W
a8055021382576da48dedce9b5710afa	4	0	0	0	0	0	0	0	0	0	1	0	0	1	0	0	0	0	0	0	0	1	0	8	0	0	0	0	0	0	0	0	0	0	0	0	D_0__Bacteria;D_1__Proteobacteria;D_2__Gammaproteobacteria;D_3__Betaproteobacteriales;D_4__Burkholderiaceae
b17e4efb6c65cd560577b9a9797c25cf	3	10	4	7	8	8	5	9	8	9	6	7	0	0	0	0	0	0	0	0	0	4	0	0	0	0	0	0	0	0	9	6	4	6	4	1	D_0__Bacteria;D_1__Proteobacteria;D_2__Alphaproteobacteria;D_3__Rhizobiales;D_4__Xanthobacteraceae;D_5__Pseudolabrys;D_6__uncultured Caulobacterales bacterium
1e52090945b4d8ef9e8b6dccc1f0898c	3	7	2	2	0	0	0	3	2	0	1	0	1	0	1	0	0	0	0	0	0	0	0	0	0	0	0	1	0	0	0	0	0	1	0	0	D_0__Bacteria;D_1__Proteobacteria;D_2__Gammaproteobacteria;D_3__Xanthomonadales
03ba7668203143b687461aeb81cbe22b	49	3	16	38	29	27	16	13	3	9	24	37	4	21	23	36	11	22	17	8	54	12	30	15	53	25	16	32	54	31	34	22	37	31	35	42	D_0__Bacteria;D_1__Proteobacteria;D_2__Gammaproteobacteria;D_3__Pseudomonadales;D_4__Pseudomonadaceae;D_5__Pseudomonas
41737597a5604a039b9a1161813529fd	0	0	0	2	4	1	1	2	2	1	2	3	0	0	0	5	0	0	0	1	0	0	0	0	0	0	3	0	0	0	0	0	2	0	3	2	D_0__Bacteria;D_1__Acidobacteria;D_2__Holophagae;D_3__Holophagales;D_4__Holophagaceae;D_5__Holophaga;D_6__uncultured Acidobacterium sp.
8ce29dbc45bd60c6a3eaea8903d32eb8	0	1	0	1	0	0	0	1	1	2	2	0	0	0	1	0	0	2	0	0	0	0	0	0	0	0	0	3	0	0	0	3	1	1	0	1	D_0__Bacteria;D_1__Planctomycetes;D_2__Phycisphaerae;D_3__Tepidisphaerales;D_4__CPla-3 termite group;D_5__metagenome;D_6__metagenome
4e785777b90de1528e752f9df14806dc	0	0	0	0	2	0	2	0	0	0	0	3	0	0	0	0	0	0	0	0	0	0	0	0	0	0	0	0	0	0	0	0	0	0	0	0	D_0__Bacteria;D_1__Actinobacteria;D_2__Actinobacteria;D_3__Frankiales;D_4__Acidothermaceae;D_5__Acidothermus;D_6__bacterium Ellin334
f82706a24b23eb21e70c26321192f66e	2	0	0	2	0	0	2	0	0	0	0	3	0	0	0	0	0	0	0	3	0	0	0	0	0	0	0	0	0	0	0	0	0	0	2	0	D_0__Bacteria;D_1__Actinobacteria;D_2__Actinobacteria;D_3__Corynebacteriales;D_4__Nocardiaceae;D_5__Rhodococcus
e207d5c39e24110e1f303e1a9226184a	0	0	3	2	0	0	1	0	0	1	0	0	0	0	0	0	0	0	0	0	0	0	0	0	0	0	0	0	0	0	0	0	0	0	0	0	D_0__Bacteria;D_1__Gemmatimonadetes;D_2__Gemmatimonadetes;D_3__Gemmatimonadales;D_4__Gemmatimonadaceae
230299863ad51bb04125bfe6b8a2eda2	4	3	5	3	0	1	0	0	1	5	0	0	1	2	0	0	0	1	0	0	0	2	0	0	0	0	1	0	0	0	0	0	1	0	0	1	D_0__Bacteria;D_1__Gemmatimonadetes;D_2__Gemmatimonadetes;D_3__Gemmatimonadales;D_4__Gemmatimonadaceae;D_5__Gemmatimonas;D_6__Gemmatimonadetes bacterium Ellin7146
1b60fc78324b7de77c9bcf22d06d3b00	1	0	0	0	0	0	0	0	0	1	2	0	0	1	0	0	3	2	1	0	0	0	0	0	0	0	0	0	0	0	0	0	0	0	0	0	D_0__Bacteria;D_1__Actinobacteria;D_2__Actinobacteria;D_3__Corynebacteriales;D_4__Nocardiaceae;D_5__Nocardia
2f51cb45cb91bc0c7a8effd31188beb9	0	0	0	0	0	0	0	0	3	0	0	0	0	0	0	0	0	0	0	0	0	0	0	0	0	0	0	0	0	0	3	0	0	0	0	0	D_0__Bacteria;D_1__Chloroflexi;D_2__Anaerolineae;D_3__SBR1031;D_4__uncultured Gemmatimonadetes bacterium;D_5__uncultured Gemmatimonadetes bacterium;D_6__uncultured Gemmatimonadetes bacterium
a208c86a64ea9f31b50a4218b0483945	0	0	0	0	0	0	0	0	0	1	0	0	0	0	0	0	0	1	0	2	2	0	2	0	0	0	0	0	1	0	0	0	0	0	0	0	D_0__Bacteria;D_1__Firmicutes;D_2__Bacilli;D_3__Bacillales;D_4__Bacillaceae;D_5__Bacillus
7f03c50bcf3e5956f59d608c2950acb8	0	0	0	0	0	0	0	0	0	0	0	0	0	0	0	0	0	0	0	0	0	2	0	0	0	0	0	0	0	0	0	0	0	0	0	0	D_0__Bacteria;D_1__Proteobacteria;D_2__Deltaproteobacteria;D_3__Myxococcales;D_4__Haliangiaceae;D_5__Haliangium
2d2d91623b700dd2034cb4e405563443	0	0	1	0	0	0	0	2	0	2	0	1	0	0	0	0	1	4	0	0	0	0	0	0	0	0	0	0	1	0	0	0	0	2	0	0	D_0__Bacteria;D_1__Acidobacteria;D_2__Acidobacteriia;D_3__Solibacterales;D_4__Solibacteraceae (Subgroup 3);D_5__Candidatus Solibacter
0e6457b96e7b1b3eab07aeb1d223e4cc	0	0	0	0	0	0	0	1	1	0	0	1	0	0	0	0	0	0	0	0	0	0	0	0	0	0	0	0	0	2	2	0	0	0	0	6	D_0__Bacteria;D_1__Latescibacteria
889e1066bfe3ddf75a4737e92ce28d42	2	0	3	0	0	0	0	0	0	0	0	0	0	0	0	0	0	0	0	0	0	0	0	0	0	0	0	0	0	0	0	0	0	0	0	0	D_0__Bacteria;D_1__Proteobacteria;D_2__Deltaproteobacteria;D_3__Myxococcales;D_4__Haliangiaceae;D_5__Haliangium
ddd82b9d411247078795ce603fd6e624	3	5	2	2	2	3	4	5	2	6	3	5	6	1	4	4	6	4	11	2	4	0	5	4	6	5	3	4	6	9	7	3	14	7	5	1	D_0__Bacteria;D_1__Actinobacteria;D_2__Actinobacteria;D_3__Propionibacteriales;D_4__Nocardioidaceae;D_5__Kribbella
6a21ca51db66805ccf88e39a640d69d4	0	0	0	0	0	2	0	0	0	2	0	0	0	0	0	1	0	4	0	0	0	0	0	0	0	0	0	0	0	0	0	0	0	3	4	0	D_0__Bacteria;D_1__Actinobacteria;D_2__Actinobacteria
4910c5fec8342a3818b38d5f218c3af5	0	0	3	0	1	0	0	1	2	1	0	0	0	0	0	0	0	0	0	0	0	0	2	0	0	0	1	0	1	0	1	0	0	0	1	0	D_0__Bacteria;D_1__Actinobacteria;D_2__Actinobacteria;D_3__Corynebacteriales;D_4__Mycobacteriaceae;D_5__Mycobacterium
3ff53307707bbaf6ace20df8159845cf	0	0	0	0	0	0	0	2	2	0	0	0	0	0	0	0	0	0	0	0	0	0	0	0	0	0	0	0	0	0	0	0	0	0	0	0	D_0__Bacteria;D_1__Proteobacteria;D_2__Deltaproteobacteria;D_3__Myxococcales;D_4__Haliangiaceae;D_5__Haliangium
1b536ec7c13e49585afb2f276b808f32	0	3	3	2	0	3	0	0	0	6	2	0	3	0	1	0	0	1	0	0	0	0	0	0	0	0	0	0	0	0	4	0	1	2	1	1	D_0__Bacteria;D_1__Firmicutes;D_2__Bacilli;D_3__Lactobacillales;D_4__Enterococcaceae;D_5__Enterococcus
050ae677684955a96da000f63c43d143	4	4	2	2	1	2	2	1	4	2	2	5	7	5	3	8	1	0	4	1	1	0	1	5	3	3	10	5	1	2	1	4	3	4	3	2	D_0__Bacteria;D_1__Proteobacteria;D_2__Gammaproteobacteria;D_3__Betaproteobacteriales;D_4__SC-I-84
fdeda95fe8638f1976b16c02a6a7d11e	0	0	0	0	0	0	0	0	2	0	0	2	0	1	0	0	2	0	3	0	2	0	0	0	0	0	1	0	0	0	1	1	3	2	0	1	D_0__Bacteria;D_1__Proteobacteria;D_2__Deltaproteobacteria;D_3__Myxococcales;D_4__Haliangiaceae;D_5__Haliangium;D_6__myxobacterium AT3-03
293d1a4f58b48145cdd03e3eb7cfd727	1	0	0	0	0	0	0	0	0	0	0	5	2	0	0	0	0	0	0	0	0	0	0	0	0	0	0	0	1	0	0	0	0	0	0	2	D_0__Bacteria;D_1__Nitrospirae;D_2__Nitrospira;D_3__Nitrospirales;D_4__Nitrospiraceae;D_5__Nitrospira;D_6__Candidatus Nitrospira inopinata
2508046a3b52b5b47c7c89f926a37544	0	7	0	0	0	0	0	1	0	1	0	0	1	0	0	0	1	0	0	1	0	0	2	1	3	0	5	0	0	0	0	0	0	1	0	2	D_0__Bacteria;D_1__Proteobacteria;D_2__Alphaproteobacteria
2855b985c5646ff95b9a3eb3d7091fe0	0	0	0	0	1	0	0	0	0	0	0	0	0	0	0	0	2	0	0	0	1	2	0	1	0	0	0	0	0	0	0	0	0	0	0	0	D_0__Bacteria;D_1__Acidobacteria;D_2__Acidobacteriia;D_3__Acidobacteriales;D_4__uncultured;D_5__bacterium Ellin7529;D_6__bacterium Ellin7529
306002894c5f0472473d5620a57b60c5	0	1	0	0	0	0	0	1	0	1	0	0	0	0	0	0	0	0	0	0	0	2	0	0	0	0	0	0	0	0	0	0	0	0	0	0	D_0__Bacteria;D_1__Proteobacteria;D_2__Alphaproteobacteria
3c31c7731ac7f01dacbb7055e9913ad6	0	0	0	0	0	0	2	0	0	0	0	1	0	0	0	0	0	0	0	0	0	0	0	0	0	0	0	0	0	0	3	0	3	0	0	0	D_0__Bacteria;D_1__Acidobacteria;D_2__Acidobacteriia;D_3__Solibacterales;D_4__Solibacteraceae (Subgroup 3);D_5__Candidatus Solibacter
b14307319c2bcd9b8f7a13d9c1671796	25	0	11	4	4	5	4	3	6	5	4	9	3	16	15	3	4	7	0	3	5	3	2	6	8	7	4	6	1	7	4	4	2	6	5	3	D_0__Bacteria;D_1__Bacteroidetes;D_2__Bacteroidia;D_3__Chitinophagales;D_4__Chitinophagaceae;D_5__Dinghuibacter;D_6__uncultured prokaryote
3c7b073c55611ffbf324b87c691b006c	0	0	1	2	0	0	0	0	0	0	0	0	0	0	0	0	0	0	0	0	0	0	0	0	0	0	0	0	0	0	0	0	2	0	1	0	D_0__Bacteria;D_1__Actinobacteria;D_2__Actinobacteria;D_3__Micrococcales;D_4__Intrasporangiaceae
ef5d755ce305e2e8b59f7f7f454c15a4	0	0	0	0	0	0	0	3	0	0	0	0	0	0	1	0	0	0	0	0	0	0	0	0	0	0	0	0	0	0	0	0	0	0	0	0	D_0__Bacteria;D_1__Chloroflexi;D_2__KD4-96
169b012031cf74954968ba567b0c0092	1	0	0	0	0	0	0	0	0	0	0	0	0	0	2	1	0	0	0	0	0	0	0	0	0	0	0	0	0	0	0	0	0	0	0	0	D_0__Bacteria;D_1__Patescibacteria;D_2__Saccharimonadia;D_3__Saccharimonadales;D_4__uncultured bacterium SBR2004;D_5__uncultured bacterium SBR2004;D_6__uncultured bacterium SBR2004
f49e76b7c20656055476e3054af1aff6	0	0	0	0	0	1	0	0	0	0	0	0	0	0	0	0	0	0	0	1	0	1	0	0	0	0	0	0	0	0	0	0	0	0	1	1	D_0__Bacteria;D_1__Acidobacteria;D_2__Acidobacteriia;D_3__Solibacterales;D_4__Solibacteraceae (Subgroup 3);D_5__Candidatus Solibacter;D_6__bacterium Ellin6505
473327ab0611f3f58308a528be361031	0	2	2	0	0	0	2	0	0	0	0	1	0	0	0	0	0	0	0	0	5	0	0	0	0	0	0	2	0	1	0	0	0	0	0	0	D_0__Bacteria;D_1__Bacteroidetes;D_2__Bacteroidia;D_3__Chitinophagales;D_4__Chitinophagaceae;D_5__Terrimonas
4ba08629b4bbf2533536f8b4d216d716	1	3	4	3	2	3	0	2	4	2	1	2	0	6	4	1	3	8	1	1	2	3	0	2	2	6	3	0	3	0	7	5	2	1	3	5	D_0__Bacteria;D_1__Proteobacteria;D_2__Gammaproteobacteria;D_3__JG36-GS-52;D_4__uncultured soil bacterium;D_5__uncultured soil bacterium;D_6__uncultured soil bacterium
8dd9b45d4de6bf982fdc0e73e4860206	0	0	0	3	0	0	0	0	0	0	0	0	0	0	0	0	0	0	0	0	0	0	0	0	2	0	0	0	0	2	0	0	0	0	0	0	D_0__Bacteria;D_1__Proteobacteria;D_2__Gammaproteobacteria;D_3__Cellvibrionales;D_4__Porticoccaceae;D_5__Porticoccus;D_6__metagenome
d187ed05c3aef88a6abc46462286de40	0	0	0	0	0	0	2	0	0	1	0	1	1	2	1	0	0	0	0	0	0	2	0	0	0	0	1	2	0	0	3	11	2	6	6	4	D_0__Bacteria;D_1__Latescibacteria
b5fdd936bf6435bf038fa1cea6671a97	0	0	0	0	0	0	0	0	0	0	0	0	0	3	3	0	0	0	0	0	0	0	3	0	1	1	0	0	0	0	0	0	0	0	0	0	D_0__Bacteria;D_1__Firmicutes;D_2__Bacilli;D_3__Bacillales;D_4__Bacillaceae;D_5__Bacillus
752e9de5a698468fe8370bcdd50c6422	0	0	0	0	0	0	0	0	2	0	0	0	2	0	0	0	2	0	0	3	0	0	0	0	0	1	0	0	0	0	0	0	0	0	0	0	D_0__Bacteria;D_1__Proteobacteria;D_2__Gammaproteobacteria;D_3__Steroidobacterales;D_4__Steroidobacteraceae
3ee34096400a318a6944375ed6718ee6	0	0	0	0	0	0	0	0	0	0	0	0	0	0	0	2	3	0	0	0	0	0	0	0	0	0	0	0	1	0	0	0	0	0	0	0	D_0__Bacteria;D_1__Chloroflexi;D_2__AD3;D_3__uncultured forest soil bacterium;D_4__uncultured forest soil bacterium;D_5__uncultured forest soil bacterium;D_6__uncultured forest soil bacterium
e69be42235d85eb9fb0ce54c21ae3657	0	0	0	0	1	2	0	0	0	0	0	0	0	0	0	0	0	0	0	0	0	0	0	0	0	0	0	0	0	0	0	2	1	0	0	0	D_0__Bacteria
4e8ff45f30691a74b596db7362c5d095	0	0	0	4	0	0	0	0	0	2	0	0	0	2	2	0	0	0	2	3	3	0	0	3	0	0	0	2	0	3	0	0	0	0	0	0	D_0__Bacteria;D_1__Proteobacteria;D_2__Deltaproteobacteria;D_3__Myxococcales;D_4__Haliangiaceae;D_5__Haliangium;D_6__uncultured sludge bacterium A9
2d54e77ad02efcab697d33819464bd66	1	0	1	0	0	1	0	0	0	0	0	0	0	0	0	0	0	0	0	0	0	0	0	0	0	0	0	0	0	0	1	0	0	0	0	0	D_0__Bacteria;D_1__Proteobacteria;D_2__Gammaproteobacteria;D_3__Betaproteobacteriales;D_4__Nitrosomonadaceae;D_5__MND1;D_6__uncultured Methylococcales bacterium
f01f9b456d41cdfd02d4f978d82fd5fa	1	0	0	0	1	0	0	1	7	5	3	3	7	6	0	0	0	2	5	0	3	6	4	0	0	0	1	0	0	3	3	1	0	5	1	2	D_0__Bacteria;D_1__Acidobacteria;D_2__Subgroup 6
65351729db9dd1c3dc63ef02f2a9e963	2	2	2	4	1	1	6	0	0	0	1	1	0	1	0	0	0	0	0	0	0	0	0	0	0	0	1	0	0	0	3	2	8	0	2	0	D_0__Bacteria;D_1__Proteobacteria;D_2__Gammaproteobacteria;D_3__CCD24;D_4__uncultured Pseudoxanthomonas sp.;D_5__uncultured Pseudoxanthomonas sp.;D_6__uncultured Pseudoxanthomonas sp.
412a9082b3fa7413e13065c207c5a194	0	0	0	0	0	0	0	0	1	0	0	0	0	0	1	0	0	0	0	0	0	0	0	0	2	0	0	4	0	0	0	0	0	0	0	0	D_0__Bacteria;D_1__Bacteroidetes;D_2__Ignavibacteria;D_3__Ignavibacteriales
becaa8d743e67eab96b5e5db4e98bd29	0	0	0	0	4	0	0	0	0	2	0	1	0	0	0	0	0	0	2	2	0	0	2	0	2	0	1	5	1	0	2	0	3	1	1	1	D_0__Bacteria;D_1__Acidobacteria;D_2__Subgroup 22
3fbae409c6d88f4fdc1561cae446c90d	0	0	1	6	2	2	0	0	0	0	0	0	1	2	0	0	7	0	0	3	0	3	0	1	2	2	3	3	6	3	2	0	0	0	0	0	D_0__Bacteria;D_1__Proteobacteria;D_2__Gammaproteobacteria;D_3__Xanthomonadales;D_4__Rhodanobacteraceae;D_5__Chujaibacter;D_6__Xanthomonadales bacterium 66-474
22e3a09f00ecb4144c7475bc86408a6c	0	3	0	1	0	0	0	3	3	0	1	0	0	0	0	0	0	1	0	0	0	0	0	0	0	0	0	0	0	0	1	0	0	3	1	2	D_0__Bacteria;D_1__Actinobacteria;D_2__Thermoleophilia;D_3__Solirubrobacterales;D_4__67-14;D_5__uncultured Conexibacteraceae bacterium;D_6__uncultured Conexibacteraceae bacterium
704e9d9ae07e62933a36ce711b543263	0	0	0	0	0	0	0	0	1	1	0	0	0	3	1	3	0	1	0	0	0	0	1	0	0	0	0	0	3	0	0	0	0	0	0	0	D_0__Bacteria;D_1__Proteobacteria;D_2__Gammaproteobacteria;D_3__Xanthomonadales
a3532fc1a4c848eea5e5ca312000e6fb	0	0	0	0	0	0	0	0	0	0	0	0	0	0	1	0	1	0	2	0	0	0	0	1	0	0	0	0	0	2	0	0	0	0	0	0	D_0__Bacteria;D_1__Actinobacteria;D_2__Actinobacteria;D_3__Micromonosporales;D_4__Micromonosporaceae;D_5__Hamadaea
20ffb63e29fe0e8907fc18168dacc9b4	0	0	4	0	0	0	0	0	0	0	5	0	0	0	0	0	5	24	0	0	0	3	3	0	0	12	0	0	0	1	0	0	0	0	0	0	D_0__Bacteria;D_1__Proteobacteria;D_2__Alphaproteobacteria;D_3__Sphingomonadales;D_4__Sphingomonadaceae;D_5__Sphingomonas
076b0935a779d1eec91f0c21fc03fd42	2	0	0	0	0	3	1	1	1	0	0	1	0	0	0	0	0	0	0	2	0	0	0	0	0	0	0	0	0	0	0	0	4	0	0	0	D_0__Bacteria;D_1__Actinobacteria;D_2__Acidimicrobiia;D_3__IMCC26256;D_4__uncultured Ferrimicrobium sp.;D_5__uncultured Ferrimicrobium sp.;D_6__uncultured Ferrimicrobium sp.
9399ac2e71a22e1ae60ad9c30c0b1efe	0	0	0	0	0	0	0	0	0	0	0	0	0	0	0	0	0	0	4	0	0	0	0	0	0	0	0	2	1	0	0	0	0	0	0	0	D_0__Bacteria;D_1__Proteobacteria;D_2__Gammaproteobacteria;D_3__Betaproteobacteriales;D_4__TRA3-20
56a561e4c48d2d3e90f51ccfbc9db2a1	0	2	0	2	0	0	0	0	0	0	0	0	0	0	0	2	0	0	0	0	0	0	0	0	0	0	0	0	0	0	0	0	0	0	0	0	D_0__Bacteria;D_1__Patescibacteria;D_2__Saccharimonadia;D_3__Saccharimonadales
6401759bdc376a8dba9ce2e274dcaed8	14	3	26	4	4	7	3	0	0	1	6	0	0	1	0	0	3	4	1	2	10	6	0	0	2	9	0	0	6	0	6	1	4	0	1	3	D_0__Bacteria;D_1__Acidobacteria;D_2__Subgroup 6;D_3__Acidobacteria bacterium SCN 69-37;D_4__Acidobacteria bacterium SCN 69-37;D_5__Acidobacteria bacterium SCN 69-37;D_6__Acidobacteria bacterium SCN 69-37
5efb1d72db14235a40ccd3a76c235dd2	0	0	0	2	0	0	0	0	0	0	0	0	0	0	0	0	0	1	3	0	0	0	0	0	0	0	0	2	0	0	0	3	0	0	0	0	D_0__Bacteria;D_1__Verrucomicrobia;D_2__Verrucomicrobiae;D_3__Pedosphaerales;D_4__Pedosphaeraceae;D_5__ADurb.Bin063-1
1da7a2716a30ee7355268abf4cef0c07	0	0	0	0	0	0	0	0	0	0	0	0	0	0	0	0	0	0	0	0	0	1	0	0	0	3	2	0	2	0	0	0	0	0	0	0	D_0__Bacteria;D_1__Proteobacteria;D_2__Deltaproteobacteria;D_3__Bdellovibrionales;D_4__Bdellovibrionaceae;D_5__OM27 clade
805d7d665fff1932782884c0623df2da	0	1	0	2	0	0	0	0	0	0	0	0	1	0	0	2	0	0	0	5	0	0	0	0	0	0	0	0	1	0	0	0	0	0	0	0	D_0__Bacteria;D_1__Actinobacteria;D_2__Acidimicrobiia;D_3__IMCC26256;D_4__uncultured Ferrimicrobium sp.;D_5__uncultured Ferrimicrobium sp.;D_6__uncultured Ferrimicrobium sp.
8e82231a7e2f4cfe35d5960a1cd23288	0	0	0	0	0	0	0	0	0	0	0	0	0	0	0	0	0	0	0	9	0	0	0	0	0	0	0	0	0	0	0	0	1	0	0	0	D_0__Bacteria;D_1__Gemmatimonadetes;D_2__Gemmatimonadetes;D_3__Gemmatimonadales;D_4__Gemmatimonadaceae;D_5__uncultured
b5bba169f732f76929a191dc27136526	0	2	0	0	0	0	0	2	0	0	0	0	0	0	0	0	0	0	0	0	2	1	0	0	0	0	0	0	0	0	0	0	0	0	0	0	D_0__Bacteria;D_1__Proteobacteria;D_2__Gammaproteobacteria;D_3__Betaproteobacteriales;D_4__Rhodocyclaceae
b5c2a083ded9c2fb65d4e2e869e4f61e	0	0	0	0	0	0	0	0	0	0	0	0	0	0	0	0	0	0	0	0	1	0	5	0	1	0	0	0	0	1	0	0	0	0	0	0	D_0__Bacteria;D_1__Bacteroidetes;D_2__Bacteroidia;D_3__Chitinophagales;D_4__Chitinophagaceae;D_5__Flavitalea
419b76610c5994a07df4903a68fcba96	2	6	10	2	1	2	2	2	0	3	3	0	4	4	0	0	7	14	13	3	8	4	9	4	0	8	3	2	3	0	6	10	4	6	1	6	D_0__Bacteria;D_1__Acidobacteria;D_2__Holophagae;D_3__Subgroup 7;D_4__uncultured Desulfovirga sp.;D_5__uncultured Desulfovirga sp.;D_6__uncultured Desulfovirga sp.
e1688e4f09ea46b5bae09a50716f988b	0	1	0	1	0	0	1	1	0	0	0	0	0	0	0	0	0	0	0	0	0	1	1	0	0	1	0	0	0	2	0	0	0	0	0	3	D_0__Bacteria;D_1__Gemmatimonadetes;D_2__Gemmatimonadetes;D_3__Gemmatimonadales;D_4__Gemmatimonadaceae;D_5__Gemmatimonas;D_6__Gemmatimonadetes bacterium Ellin7146
afd49bdd154c40e5b9c97618ea0c5a85	0	0	0	0	2	0	0	2	3	0	0	0	0	0	0	2	0	0	0	0	1	0	0	2	0	0	0	0	0	0	0	0	0	0	0	0	D_0__Bacteria;D_1__Proteobacteria;D_2__Gammaproteobacteria;D_3__Betaproteobacteriales;D_4__TRA3-20
54661470281f60bda9c396174e1d4442	0	0	0	0	0	3	0	0	0	0	0	1	0	0	0	0	0	0	0	0	0	0	0	0	0	0	0	0	0	0	0	0	0	0	0	0	D_0__Bacteria;D_1__Firmicutes;D_2__Clostridia;D_3__Clostridiales;D_4__Clostridiaceae 1;D_5__uncultured;D_6__Clostridium sp. SW003
16d6fcc7ddc11f85154e18e1a0334f7f	0	0	0	0	0	0	0	0	0	0	0	0	0	0	0	0	0	0	0	0	7	0	0	0	0	0	0	0	0	0	0	0	0	0	0	0	D_0__Bacteria;D_1__Proteobacteria;D_2__Gammaproteobacteria;D_3__Betaproteobacteriales;D_4__Nitrosomonadaceae;D_5__Ellin6067
2cea1116b9761718d3500ba708075556	0	0	0	0	0	2	1	0	2	0	2	1	0	0	0	0	0	0	0	0	0	0	0	0	0	0	0	0	0	0	0	0	0	0	0	0	D_0__Bacteria;D_1__Firmicutes;D_2__Bacilli;D_3__Bacillales;D_4__Bacillaceae;D_5__Bacillus
33dbb0fdc846de6b4d122a404c853855	0	0	0	0	0	0	1	0	0	0	0	1	0	0	0	0	2	0	0	0	0	2	2	0	3	0	2	2	2	3	0	0	0	0	2	0	D_0__Bacteria;D_1__Verrucomicrobia;D_2__Verrucomicrobiae;D_3__Chthoniobacterales;D_4__Chthoniobacteraceae;D_5__Candidatus Udaeobacter
f74355a3abda2b3e1eb2c0edffa051f2	0	0	0	0	0	0	0	0	0	0	0	0	0	0	0	0	0	0	0	0	0	0	0	0	0	0	0	0	0	0	1	0	0	2	0	2	D_0__Bacteria;D_1__Proteobacteria;D_2__Gammaproteobacteria;D_3__Betaproteobacteriales
c3993420927c545e8c58d68d324ace8b	0	0	0	0	0	0	0	0	0	1	2	0	0	0	0	0	0	0	0	0	0	0	0	0	0	0	0	0	0	0	1	0	0	0	2	0	D_0__Bacteria;D_1__Proteobacteria;D_2__Gammaproteobacteria;D_3__KI89A clade
6ff733b41c5d71b8ac55cd983de97df9	0	0	0	0	0	0	0	0	5	0	0	0	9	0	4	1	0	0	0	0	0	0	0	1	0	0	0	1	0	1	0	0	0	1	0	1	D_0__Bacteria;D_1__Proteobacteria;D_2__Alphaproteobacteria;D_3__Reyranellales;D_4__Reyranellaceae;D_5__Reyranella;D_6__uncultured proteobacterium
e6e049dd19482eb2273ed221d558e0f4	0	0	0	0	0	1	0	5	0	0	0	0	5	1	0	1	0	0	4	1	2	0	2	1	1	1	0	1	0	1	0	0	0	0	0	1	D_0__Bacteria;D_1__Proteobacteria;D_2__Gammaproteobacteria;D_3__Betaproteobacteriales;D_4__Nitrosomonadaceae;D_5__mle1-7;D_6__uncultured Rhodocyclaceae bacterium
929b8b4f1ddae09f66162a31f53813bf	1	0	4	1	2	1	1	0	0	0	1	2	0	4	3	0	2	4	2	0	0	0	2	0	1	4	2	0	5	4	3	2	2	0	5	1	D_0__Bacteria;D_1__Bacteroidetes;D_2__Bacteroidia;D_3__Chitinophagales;D_4__Chitinophagaceae;D_5__uncultured
36cd51491f2361a6113f2a8be17e1ab7	0	1	0	0	0	0	0	0	0	0	0	0	0	0	0	0	2	0	0	0	0	0	0	0	0	0	0	0	0	0	0	1	0	0	0	2	D_0__Bacteria;D_1__Acidobacteria;D_2__Subgroup 6;D_3__uncultured bacterium 213;D_4__uncultured bacterium 213;D_5__uncultured bacterium 213;D_6__uncultured bacterium 213
f5b92a89322380664e92e318741488a5	0	2	0	0	0	0	0	2	0	0	0	0	0	0	0	0	0	0	0	0	0	0	0	0	0	0	0	0	0	0	0	0	3	0	0	0	D_0__Bacteria;D_1__Bacteroidetes;D_2__Bacteroidia
ed3d7164be2879a96923a0cae4dbac28	0	0	0	0	0	0	0	0	0	0	0	0	1	0	0	0	0	0	0	1	0	0	0	2	0	2	2	0	0	0	0	0	0	0	0	0	D_0__Bacteria;D_1__Chloroflexi;D_2__Dehalococcoidia;D_3__S085;D_4__uncultured soil bacterium;D_5__uncultured soil bacterium;D_6__uncultured soil bacterium
424acc2437f03f09c53e31584876a628	0	0	2	0	0	1	0	0	0	0	2	0	0	0	0	0	0	0	0	0	0	0	0	0	0	0	0	0	0	0	3	3	2	0	0	1	D_0__Bacteria
bdcabd08cbc2749a702e1b16d92d18e8	0	0	0	0	0	0	1	1	0	0	0	0	0	0	0	0	0	0	0	0	0	0	0	0	0	0	0	0	0	0	0	1	0	2	1	1	D_0__Bacteria;D_1__Proteobacteria;D_2__Deltaproteobacteria;D_3__Desulfarculales;D_4__Desulfarculaceae;D_5__uncultured;D_6__uncultured soil bacterium
de2a3e89e5182be50ac6ad544e596908	0	0	4	2	0	0	0	0	0	0	1	0	0	0	0	0	0	2	0	0	0	0	0	0	0	0	0	0	0	4	0	0	0	0	2	0	D_0__Bacteria;D_1__Proteobacteria;D_2__Gammaproteobacteria;D_3__Cellvibrionales;D_4__Spongiibacteraceae;D_5__BD1-7 clade;D_6__uncultured proteobacterium
59a622c8bce852d35def41e9eae79ed8	0	0	0	0	0	0	0	0	0	2	0	0	0	0	1	0	0	1	0	0	0	0	0	0	1	0	0	0	0	2	0	0	0	0	0	0	D_0__Bacteria;D_1__Actinobacteria;D_2__Thermoleophilia;D_3__Gaiellales;D_4__uncultured;D_5__bacterium Ellin7530;D_6__bacterium Ellin7530
2ee411d32e669fe4c07cdb375c534da0	0	0	0	0	0	0	0	0	0	0	0	0	0	0	0	0	0	0	0	2	0	0	0	0	0	0	0	0	0	0	2	0	0	0	0	0	D_0__Bacteria;D_1__Bacteroidetes;D_2__Bacteroidia;D_3__Cytophagales;D_4__Cyclobacteriaceae;D_5__Algoriphagus;D_6__Algoriphagus terrigena DSM 22685
fe108891635f4f4355538375afde1a58	0	0	2	0	1	0	0	0	0	0	0	0	0	0	0	0	0	0	0	0	0	0	0	0	0	0	0	0	0	0	0	2	0	0	1	0	D_0__Bacteria;D_1__Actinobacteria;D_2__Acidimicrobiia;D_3__Microtrichales;D_4__Ilumatobacteraceae
46723c4e124ce882562b5e8cb409805a	0	0	0	0	0	0	0	0	0	0	0	0	0	1	0	0	0	0	0	6	1	0	2	0	0	0	0	0	2	0	0	0	0	0	0	0	D_0__Bacteria;D_1__Proteobacteria;D_2__Deltaproteobacteria;D_3__Myxococcales
b22d109d06b7deb2fc31558d539f7965	5	0	3	3	2	4	0	2	6	2	5	2	1	8	6	4	12	11	6	9	6	6	7	5	10	10	6	8	8	19	6	0	3	4	2	4	D_0__Bacteria;D_1__Actinobacteria;D_2__Thermoleophilia;D_3__Gaiellales;D_4__Gaiellaceae;D_5__Gaiella;D_6__actinobacterium WWH12
e67225ad1ca783f26bee9ef87a322da3	0	0	3	0	0	0	1	0	0	0	0	1	0	0	0	0	0	2	0	0	2	0	0	0	0	1	0	2	0	0	0	0	0	0	0	0	D_0__Bacteria;D_1__Verrucomicrobia;D_2__Verrucomicrobiae;D_3__Verrucomicrobiales;D_4__Rubritaleaceae;D_5__Luteolibacter
ffb0000e3917c84fcf7c1bf5d6f6a231	0	0	0	0	0	0	0	0	0	0	1	0	0	0	0	0	0	0	0	0	0	2	0	0	0	0	0	2	0	0	0	0	0	0	0	3	D_0__Bacteria;D_1__Proteobacteria;D_2__Gammaproteobacteria;D_3__Xanthomonadales;D_4__Xanthomonadaceae;D_5__Luteimonas
f2e2d71d6d02615e94dafeaf77dd1cb8	0	0	0	0	0	0	0	0	0	0	0	0	0	0	0	3	0	0	0	0	0	0	0	0	1	0	0	2	0	0	0	0	0	0	0	0	D_0__Bacteria;D_1__Actinobacteria;D_2__Actinobacteria;D_3__Micrococcales;D_4__Microbacteriaceae
5bf50dfaeca76d8de562f374605a03ae	0	0	0	0	0	2	0	0	0	0	0	0	0	0	0	0	0	0	0	0	0	0	0	0	0	0	0	0	0	0	0	4	3	1	0	0	D_0__Bacteria;D_1__Acidobacteria;D_2__Acidobacteriia;D_3__Solibacterales;D_4__Solibacteraceae (Subgroup 3);D_5__Candidatus Solibacter
d12738ce6331d3cf74044d572fb72428	0	0	0	0	0	0	0	0	0	0	0	0	0	0	0	0	0	0	0	0	0	0	0	0	0	0	0	0	0	0	0	0	0	0	0	0	D_0__Bacteria;D_1__Proteobacteria;D_2__Deltaproteobacteria;D_3__Bdellovibrionales;D_4__Bdellovibrionaceae;D_5__Bdellovibrio
287ee0f9fd5bf95d3f19840c73aa0b84	1	0	3	0	2	0	0	0	0	0	0	2	0	0	0	0	0	0	0	0	0	2	0	0	0	0	0	0	0	0	0	1	2	0	0	0	D_0__Bacteria;D_1__Acidobacteria;D_2__Holophagae;D_3__Subgroup 7;D_4__uncultured Desulfovirga sp.;D_5__uncultured Desulfovirga sp.;D_6__uncultured Desulfovirga sp.
c899f3b357cf282e1083a87c74c8a230	0	2	0	0	0	0	0	2	3	0	0	0	0	0	0	0	0	0	0	0	0	0	0	0	0	0	0	0	0	0	0	0	1	0	0	0	D_0__Bacteria;D_1__Proteobacteria;D_2__Gammaproteobacteria;D_3__Enterobacteriales;D_4__Enterobacteriaceae
4bd8c75e746635b81dc8fce2195a0d96	0	0	2	0	2	0	2	0	0	0	0	0	0	1	0	0	0	2	0	0	1	0	0	0	0	5	0	0	1	0	1	0	2	0	4	0	D_0__Bacteria;D_1__Actinobacteria;D_2__Thermoleophilia;D_3__Gaiellales;D_4__Gaiellaceae;D_5__Gaiella
1156e22e5099d0fffe8445e599360372	0	0	0	0	0	0	0	0	0	0	0	0	0	0	0	0	0	0	0	0	0	0	0	0	0	0	0	0	0	0	0	8	0	0	0	0	D_0__Archaea;D_1__Thaumarchaeota;D_2__Nitrososphaeria;D_3__Nitrososphaerales;D_4__Nitrososphaeraceae
aa87b65b5e66a20e2a5fa8c256e93be7	0	0	0	0	0	0	0	2	0	0	0	1	0	0	0	0	0	2	0	0	0	0	0	0	0	0	0	0	0	0	0	0	0	0	0	0	D_0__Bacteria;D_1__Proteobacteria;D_2__Gammaproteobacteria;D_3__Xanthomonadales;D_4__Xanthomonadaceae;D_5__Luteimonas
494fdf78fb952311b586c9ca47dac654	3	2	0	0	3	2	0	0	0	0	0	0	0	0	0	0	0	0	0	1	3	0	0	0	0	0	0	0	0	0	0	0	0	1	0	0	D_0__Bacteria;D_1__Actinobacteria;D_2__Actinobacteria;D_3__Corynebacteriales;D_4__Mycobacteriaceae;D_5__Mycobacterium
96b9c4953670e6a5c55642330bbfbaf9	0	0	0	0	0	0	0	2	0	0	0	0	3	0	0	4	0	0	0	0	0	2	2	0	0	0	0	0	1	0	0	0	0	0	2	0	D_0__Bacteria;D_1__Verrucomicrobia;D_2__Verrucomicrobiae;D_3__Chthoniobacterales;D_4__Chthoniobacteraceae;D_5__Candidatus Udaeobacter;D_6__uncultured Luteolibacter sp.
2531bdc54464c439984d13ab9ee47e91	0	0	0	0	0	0	0	1	0	0	0	0	0	0	0	0	0	0	0	0	3	0	0	0	0	0	0	0	0	0	0	0	0	2	0	0	D_0__Bacteria;D_1__Proteobacteria;D_2__Gammaproteobacteria;D_3__Betaproteobacteriales;D_4__SC-I-84
4e33afd800c4eff2823b6fe8813bad77	16	19	19	14	22	20	21	26	14	22	20	21	5	7	3	0	11	20	16	5	11	15	4	4	5	10	7	8	10	9	26	29	19	32	22	29	D_0__Bacteria;D_1__Gemmatimonadetes;D_2__Gemmatimonadetes;D_3__Gemmatimonadales;D_4__Gemmatimonadaceae;D_5__uncultured;D_6__Gemmatimonadetes bacterium LX87
39aafeff0d780ec9d2fde0eb1088f88e	0	0	0	0	0	0	0	0	0	0	0	0	0	0	0	0	0	0	0	4	1	0	0	1	0	0	0	3	0	4	0	0	0	0	0	0	D_0__Bacteria;D_1__Proteobacteria;D_2__Alphaproteobacteria;D_3__Reyranellales;D_4__Reyranellaceae;D_5__Reyranella
ecd372a586d4a98ebf4d64e468744b0c	0	0	0	0	0	0	0	0	0	0	0	0	0	0	0	2	0	0	0	0	2	0	0	0	0	0	0	0	0	0	4	0	1	0	3	2	D_0__Bacteria;D_1__Bacteroidetes;D_2__Bacteroidia;D_3__Chitinophagales;D_4__Saprospiraceae;D_5__Phaeodactylibacter;D_6__uncultured Haliscomenobacter sp.
a73a7e8fb84b811a585dec2a23d1114e	0	0	0	0	0	0	0	0	0	0	0	0	0	4	0	0	0	0	0	0	0	0	0	0	1	0	0	0	0	1	0	0	0	0	0	0	D_0__Bacteria;D_1__Proteobacteria;D_2__Gammaproteobacteria;D_3__Betaproteobacteriales;D_4__Burkholderiaceae;D_5__Burkholderia-Caballeronia-Paraburkholderia
dec49303868db5d71a13e025228b9ec1	0	0	0	0	0	0	0	0	0	0	0	0	1	1	0	0	0	1	0	0	0	2	0	0	0	1	1	0	0	0	0	0	0	0	0	0	D_0__Bacteria;D_1__Proteobacteria;D_2__Gammaproteobacteria;D_3__Betaproteobacteriales;D_4__SC-I-84
5b946a207c5242a929c57882d8da80e0	0	0	0	0	0	0	0	0	2	4	1	0	1	0	0	0	0	0	0	0	0	0	0	0	0	0	0	0	0	0	0	0	0	0	0	0	D_0__Bacteria;D_1__Proteobacteria;D_2__Alphaproteobacteria;D_3__Dongiales;D_4__Dongiaceae;D_5__Dongia;D_6__bacterium Ellin314
65074e5c7f30309cefc4c90ef5ccb0b5	1	0	0	0	2	0	0	0	0	0	0	0	0	2	0	0	0	0	0	0	0	2	0	1	0	0	2	0	0	0	0	0	0	0	0	0	D_0__Bacteria;D_1__Proteobacteria;D_2__Alphaproteobacteria;D_3__Azospirillales;D_4__Inquilinaceae;D_5__Inquilinus
6f120f9269d3dbab9ac627ba34b1f765	0	0	0	0	2	0	0	0	0	0	0	0	2	0	0	0	0	0	0	0	0	0	0	0	0	0	0	0	0	2	1	0	0	0	0	0	D_0__Bacteria;D_1__Proteobacteria;D_2__Deltaproteobacteria;D_3__Myxococcales;D_4__Haliangiaceae;D_5__Haliangium;D_6__uncultured sludge bacterium A9
29ef202e6d3a15f502a3e971545bfa76	2	0	0	1	0	0	0	2	2	0	0	0	0	0	0	0	0	0	0	0	0	0	0	0	0	0	0	0	0	0	0	2	0	3	0	0	D_0__Bacteria;D_1__Proteobacteria;D_2__Gammaproteobacteria;D_3__Diplorickettsiales;D_4__Diplorickettsiaceae;D_5__uncultured
968cf9cb3d1e618c50f0035bce3b2055	0	0	0	0	0	0	0	0	0	0	0	0	0	0	0	0	0	0	0	0	0	0	0	0	0	0	0	0	0	0	2	1	1	5	3	0	D_0__Bacteria;D_1__Latescibacteria;D_2__uncultured Acidobacterium sp.;D_3__uncultured Acidobacterium sp.;D_4__uncultured Acidobacterium sp.;D_5__uncultured Acidobacterium sp.;D_6__uncultured Acidobacterium sp.
2b278e5cbcfcb5b59b68bb0669a330c4	0	0	0	0	0	0	0	1	4	0	0	0	0	2	3	5	0	0	0	0	0	0	0	0	1	0	0	0	0	0	0	0	0	0	0	0	D_0__Bacteria;D_1__Acidobacteria;D_2__Acidobacteriia;D_3__Acidobacteriales;D_4__uncultured;D_5__uncultured bacterium DA038;D_6__uncultured bacterium DA038
e3aff9bfb56ef93a1ca79a0a328ce114	0	0	0	0	0	0	0	0	0	0	0	0	0	0	4	2	3	0	0	0	0	2	0	0	3	0	0	0	0	0	0	0	0	0	0	0	D_0__Bacteria;D_1__Proteobacteria;D_2__Gammaproteobacteria
1416ab594e5defa0150475a85aae1681	0	1	0	0	0	0	0	0	0	0	1	0	1	2	0	0	0	0	1	0	1	3	0	0	0	0	0	0	0	0	0	0	0	1	0	0	D_0__Bacteria;D_1__Proteobacteria;D_2__Gammaproteobacteria;D_3__Gammaproteobacteria Incertae Sedis;D_4__Unknown Family;D_5__Acidibacter
b01f6f83b3050df9a447fd337c494bfb	0	0	0	0	2	0	0	0	3	0	0	0	0	0	0	0	0	1	0	0	0	0	0	0	0	0	0	0	0	0	0	1	0	0	0	0	D_0__Bacteria;D_1__Proteobacteria;D_2__Gammaproteobacteria;D_3__Betaproteobacteriales;D_4__Burkholderiaceae;D_5__Cupriavidus
95ba55e5d6db7be9b7533c5023eda4a6	0	1	0	0	2	0	2	0	0	0	0	0	0	0	0	0	0	0	0	0	0	1	0	0	0	0	0	0	0	0	0	0	0	0	0	0	D_0__Bacteria;D_1__Proteobacteria;D_2__Gammaproteobacteria;D_3__Xanthomonadales;D_4__Rhodanobacteraceae;D_5__Chujaibacter;D_6__Xanthomonadales bacterium 66-474
9a4ceff663b21a8bc476e27a23ba3804	0	0	17	0	0	10	0	0	0	0	0	0	0	0	0	0	0	0	0	0	0	0	0	0	0	0	0	0	0	0	0	0	0	0	0	0	D_0__Bacteria;D_1__Proteobacteria;D_2__Gammaproteobacteria;D_3__Enterobacteriales;D_4__Enterobacteriaceae
a578c14eee2875e24bc3c7dfeed5752a	0	0	0	0	0	0	0	0	1	0	1	0	0	0	0	2	0	0	0	0	4	0	0	1	1	3	1	2	0	0	0	3	0	1	1	0	D_0__Bacteria;D_1__Acidobacteria;D_2__Acidobacteriia;D_3__Solibacterales;D_4__Solibacteraceae (Subgroup 3);D_5__Candidatus Solibacter;D_6__bacterium Ellin7504
2fc85963a593340a450de2fece2dc4fe	1	0	0	0	0	0	0	0	0	4	0	0	0	0	0	0	0	2	1	0	0	0	0	0	0	2	0	0	0	0	0	0	0	0	0	0	D_0__Bacteria;D_1__Acidobacteria;D_2__Subgroup 6
5e2b452e3c456abea0078d7e4f5b750b	4	0	1	0	0	3	0	1	2	0	3	3	2	0	0	0	0	3	1	1	0	1	0	0	0	0	1	0	0	0	1	2	1	3	0	4	D_0__Bacteria;D_1__Proteobacteria;D_2__Gammaproteobacteria;D_3__Xanthomonadales;D_4__Xanthomonadaceae;D_5__Luteimonas
8329d4d24c7d4e2a8b02c0fe07aa28c9	0	1	1	0	0	0	1	0	0	0	0	2	0	0	0	1	0	0	0	0	0	0	0	1	0	0	0	0	0	0	0	0	2	0	0	0	D_0__Bacteria;D_1__Proteobacteria;D_2__Gammaproteobacteria;D_3__Betaproteobacteriales;D_4__Nitrosomonadaceae
f867cba7c9caa9d48b1be68c6c337fb4	0	1	0	0	3	0	0	0	0	0	1	0	0	0	2	0	0	0	0	0	0	0	0	1	0	0	0	0	0	0	0	0	0	0	0	0	D_0__Bacteria;D_1__Bacteroidetes;D_2__Bacteroidia;D_3__Chitinophagales;D_4__Chitinophagaceae
b812cf8c9bc2cbf2d1c74677579eb6dc	0	0	0	0	0	0	0	1	0	2	1	0	0	1	1	0	0	0	0	0	1	0	0	0	0	0	0	0	0	0	0	0	0	0	0	0	D_0__Bacteria;D_1__Proteobacteria;D_2__Alphaproteobacteria;D_3__Reyranellales;D_4__Reyranellaceae;D_5__Reyranella;D_6__bacterium Ellin346
178268c11def6ae4db5b2ef9595bc2e2	0	0	0	1	0	2	0	0	0	0	3	1	0	3	0	0	0	0	3	0	0	2	0	0	1	1	0	0	0	0	2	0	0	0	3	2	D_0__Bacteria;D_1__Proteobacteria;D_2__Alphaproteobacteria;D_3__Rhizobiales;D_4__Hyphomicrobiaceae;D_5__Pedomicrobium
d0a4b19303dacd4b5bb4c414d2787366	0	0	0	0	0	0	0	0	0	0	0	0	1	1	2	3	0	0	0	0	0	0	2	0	0	0	0	0	0	0	0	0	0	0	0	0	D_0__Bacteria;D_1__Proteobacteria;D_2__Alphaproteobacteria;D_3__Elsterales;D_4__Elsteraceae;D_5__uncultured;D_6__uncultured Rhodospirillaceae bacterium
c98ba4715c863abe7757a877d1c630c7	0	0	1	0	0	0	0	0	0	2	0	1	0	0	0	0	0	3	0	0	0	0	0	0	0	0	0	0	0	0	0	0	0	0	0	0	D_0__Bacteria;D_1__Proteobacteria;D_2__Alphaproteobacteria;D_3__Rhodospirillales;D_4__Rhodopirillaceae;D_5__Defluviicoccus;D_6__uncultured Defluviicoccus sp.
22af3d1872d6a3890e71b1abac60dd63	0	0	0	0	0	0	0	0	0	0	0	0	1	0	0	0	0	1	0	0	0	0	0	1	1	2	3	3	1	0	1	0	0	0	1	1	D_0__Bacteria;D_1__Proteobacteria;D_2__Alphaproteobacteria;D_3__Rhizobiales;D_4__Rhizobiaceae;D_5__Mesorhizobium
2f28ad89c02ec5a198b6dc7ace715a05	0	0	0	0	0	0	0	0	0	1	1	0	0	3	0	0	0	0	0	0	2	1	0	0	0	0	0	0	0	0	0	0	0	0	0	0	D_0__Bacteria;D_1__Acidobacteria;D_2__Subgroup 6
706248598cc7517cadf756f04f80f2f3	2	0	0	0	1	1	3	0	0	0	0	0	0	0	0	0	0	0	0	0	1	0	0	0	1	0	1	0	2	3	0	0	1	0	0	2	D_0__Bacteria;D_1__Proteobacteria;D_2__Gammaproteobacteria;D_3__Xanthomonadales
fc7130668075a1a789ea739517b9a621	0	0	0	0	0	0	0	0	0	0	0	0	0	0	0	0	0	0	0	0	0	0	0	2	0	2	0	0	0	0	2	0	0	0	0	0	D_0__Bacteria;D_1__Chloroflexi;D_2__Ktedonobacteria;D_3__Ktedonobacterales;D_4__Ktedonobacteraceae;D_5__uncultured;D_6__uncultured soil bacterium
6b0414f267b349a29eafb2377edec868	1	0	0	0	2	0	2	0	2	0	1	0	3	0	0	0	2	0	0	0	0	0	0	0	0	0	0	0	0	0	2	0	0	0	0	0	D_0__Bacteria;D_1__Proteobacteria;D_2__Gammaproteobacteria;D_3__WD260;D_4__uncultured eubacterium WD260;D_5__uncultured eubacterium WD260;D_6__uncultured eubacterium WD260
f496cfb0392355d610652eb597b312b3	2	0	0	1	0	0	1	2	0	4	1	0	0	0	0	0	0	1	3	0	0	1	0	0	0	3	1	0	0	0	4	1	2	3	3	2	D_0__Bacteria;D_1__Proteobacteria;D_2__Gammaproteobacteria;D_3__Xanthomonadales;D_4__Xanthomonadaceae;D_5__Luteimonas
1e37fe14494d765d54ef85b804712367	0	1	0	0	0	1	0	0	0	0	0	0	0	0	0	0	0	0	0	0	0	0	0	0	0	0	0	0	0	0	0	0	0	0	0	0	D_0__Bacteria;D_1__Chloroflexi;D_2__Chloroflexia;D_3__Thermomicrobiales;D_4__JG30-KF-CM45;D_5__uncultured soil bacterium;D_6__uncultured soil bacterium
5d48bc9b579edfa8981c4309e7e8769e	1	0	0	0	0	0	2	0	0	0	1	0	0	1	0	1	9	2	0	1	2	0	0	1	5	4	0	2	4	2	0	2	0	1	0	0	D_0__Bacteria;D_1__Proteobacteria;D_2__Alphaproteobacteria;D_3__Rhizobiales;D_4__Beijerinckiaceae;D_5__Bosea
5d972e9ae53ba89e072670ce00f3494f	0	0	0	0	0	2	1	0	0	0	0	0	0	3	0	1	2	1	0	0	1	5	7	4	2	4	3	4	2	3	1	0	2	0	1	0	D_0__Bacteria;D_1__Proteobacteria;D_2__Gammaproteobacteria;D_3__Betaproteobacteriales;D_4__SC-I-84
3540eb1a916a741ccd80a1c6e89dceaf	0	0	0	8	2	0	0	0	0	0	1	0	3	0	0	4	0	0	0	0	0	5	0	1	2	0	0	0	2	0	0	0	1	0	0	1	D_0__Bacteria;D_1__Proteobacteria;D_2__Alphaproteobacteria;D_3__Caulobacterales;D_4__Caulobacteraceae
4c183aa392d0ae2484a9272cf175f94d	0	0	0	0	0	0	0	0	0	2	0	0	0	1	0	0	0	0	0	0	0	0	0	0	1	0	0	0	0	0	2	0	1	0	0	0	D_0__Bacteria;D_1__Firmicutes;D_2__Clostridia;D_3__Clostridiales;D_4__Clostridiaceae 1;D_5__Clostridium sensu stricto 13
659763bb2ae64e6189ce874a4e0515b7	0	2	0	0	0	0	0	0	0	0	0	0	0	0	0	0	0	0	0	0	0	0	0	0	0	0	0	0	0	0	2	0	0	0	1	0	D_0__Bacteria
25b97ed66f2dad4f23736923776534f6	0	0	0	0	0	0	2	0	0	0	2	0	0	0	0	0	2	1	0	0	0	0	0	1	2	0	0	0	0	0	0	0	0	0	0	0	D_0__Bacteria;D_1__Acidobacteria;D_2__Acidobacteriia;D_3__Acidobacteriales;D_4__uncultured;D_5__bacterium Ellin7529;D_6__bacterium Ellin7529
15f75f58e6d17081ad62f73dea1ee439	0	5	2	2	1	3	0	3	0	2	1	4	2	1	0	0	3	6	0	1	8	0	3	0	2	0	1	0	1	4	5	3	11	2	1	2	D_0__Bacteria;D_1__Actinobacteria;D_2__Actinobacteria;D_3__Corynebacteriales;D_4__Mycobacteriaceae;D_5__Mycobacterium
e399f44fdc8a67ac471b633dcf828749	0	0	0	0	0	0	0	1	1	0	0	1	3	0	0	0	0	1	0	0	0	1	0	2	0	0	0	0	0	0	0	0	0	3	0	0	D_0__Bacteria;D_1__Chloroflexi;D_2__TK10;D_3__uncultured Firmicutes bacterium;D_4__uncultured Firmicutes bacterium;D_5__uncultured Firmicutes bacterium;D_6__uncultured Firmicutes bacterium
e5534eb187085711dbdcef60b51f66c0	2	1	1	2	2	2	0	0	4	0	2	0	6	2	4	2	0	1	2	4	3	2	0	3	2	1	0	2	0	3	3	1	1	1	1	2	D_0__Bacteria;D_1__Chloroflexi;D_2__Ktedonobacteria;D_3__Ktedonobacterales;D_4__JG30-KF-AS9;D_5__uncultured bacterium;D_6__uncultured bacterium
a52425e2f79eee6c0258df1f79323985	0	0	1	0	0	0	1	0	1	0	1	2	0	0	0	0	0	0	0	0	0	0	0	4	1	0	0	0	0	0	0	1	2	0	0	0	D_0__Bacteria;D_1__Actinobacteria;D_2__Acidimicrobiia
8407b4d29ca6b628c0999102c2f6d58e	1	0	0	0	0	1	0	0	0	1	0	0	0	0	0	0	0	0	0	0	0	0	0	0	0	2	0	0	0	0	0	0	0	0	0	0	D_0__Bacteria;D_1__Proteobacteria;D_2__Alphaproteobacteria;D_3__Dongiales;D_4__Dongiaceae;D_5__Dongia;D_6__Dongia sp. URHE0060
453cd1beafdc90c3abae15e3e3fc515e	0	0	1	0	0	0	0	0	0	0	1	0	0	8	2	0	0	1	2	0	6	0	3	0	0	0	0	0	0	0	0	0	0	0	5	0	D_0__Bacteria;D_1__Firmicutes;D_2__Bacilli;D_3__Lactobacillales;D_4__Streptococcaceae;D_5__Streptococcus
db6f3e50f72056055dd7fd9711fc17a6	0	0	0	0	2	0	0	0	0	0	0	0	0	0	0	1	0	0	0	1	0	0	0	0	0	0	0	2	4	1	0	0	0	0	0	0	D_0__Bacteria;D_1__Proteobacteria;D_2__Alphaproteobacteria;D_3__Dongiales;D_4__Dongiaceae;D_5__Dongia
8242295a5b7847b560ab325d6d508265	0	0	0	0	0	0	0	0	0	0	0	0	0	2	0	0	3	0	0	0	0	0	0	3	0	0	0	0	0	0	0	0	0	0	0	0	D_0__Bacteria;D_1__Proteobacteria;D_2__Alphaproteobacteria;D_3__Rhizobiales;D_4__Devosiaceae;D_5__Pelagibacterium
95dbb466b24422c8fe6d43783c5ffda1	0	0	0	0	0	3	1	0	0	1	0	0	1	0	0	0	0	0	0	0	0	0	0	0	0	0	0	1	0	0	0	0	0	0	0	0	D_0__Bacteria;D_1__Acidobacteria;D_2__Acidobacteriia;D_3__Solibacterales;D_4__Solibacteraceae (Subgroup 3);D_5__Candidatus Solibacter;D_6__bacterium Ellin6505
1723cb10f1125edb20add898efb8da7d	0	3	0	2	0	0	0	0	0	0	0	3	0	0	4	0	0	0	0	0	0	0	0	0	0	0	0	2	0	0	0	0	0	0	0	0	D_0__Bacteria;D_1__Bacteroidetes;D_2__Bacteroidia;D_3__Sphingobacteriales;D_4__env.OPS 17;D_5__uncultured Alistipes sp.;D_6__uncultured Alistipes sp.
caed8fe2dfde92cc28d7accc424ff7f8	1	0	0	1	2	0	2	0	3	0	0	0	2	1	3	6	0	0	0	4	3	0	0	2	2	6	0	2	2	5	1	0	0	0	1	0	D_0__Bacteria;D_1__Patescibacteria;D_2__Saccharimonadia;D_3__Saccharimonadales
eacdfd40ac65cde3163ca750cacca61e	5	7	7	2	6	7	7	0	3	3	3	7	5	13	5	3	19	13	22	11	16	8	12	21	9	27	16	13	25	10	9	2	10	2	4	2	D_0__Bacteria;D_1__Actinobacteria;D_2__Acidimicrobiia;D_3__Microtrichales;D_4__Ilumatobacteraceae;D_5__Ilumatobacter;D_6__uncultured forest soil bacterium
291532a57c5cebd6fdcfed2f399c191e	1	0	0	0	0	1	0	0	0	0	1	3	0	0	3	0	2	1	3	0	2	3	3	2	0	2	1	0	1	0	0	0	0	1	2	2	D_0__Bacteria;D_1__Gemmatimonadetes;D_2__Gemmatimonadetes;D_3__Gemmatimonadales;D_4__Gemmatimonadaceae
c6e7858170ae148641dec0d1d5691f96	0	4	0	0	0	0	0	0	0	0	0	0	0	0	0	0	3	0	1	0	0	0	0	0	0	0	4	0	0	0	1	0	0	1	0	0	D_0__Bacteria
fb55608e10881fe2a0d48c3f67fec0a8	0	0	0	0	0	0	0	0	0	3	0	0	3	0	0	0	4	0	1	0	0	0	6	1	0	4	4	4	4	3	0	0	0	0	0	0	D_0__Bacteria;D_1__Proteobacteria;D_2__Gammaproteobacteria;D_3__Betaproteobacteriales;D_4__Burkholderiaceae
85cd76d9bb64e9f612eb37f0f20aa3a4	0	1	0	0	2	3	0	0	0	0	0	0	4	0	1	1	0	0	0	0	2	0	2	0	0	0	2	0	2	0	0	0	0	0	0	0	D_0__Bacteria;D_1__Dependentiae;D_2__Babeliae;D_3__Babeliales;D_4__Vermiphilaceae;D_5__uncultured Verrucomicrobia bacterium;D_6__uncultured Verrucomicrobia bacterium
4f559e280736b2881f4e88e9af5a05d1	0	0	0	0	0	0	0	0	0	0	0	2	1	4	0	0	0	2	0	0	5	0	5	1	2	0	0	5	0	3	0	0	0	0	0	0	D_0__Bacteria;D_1__Patescibacteria;D_2__Saccharimonadia;D_3__Saccharimonadales
46ed86dd48d0c186662e07416092f546	2	0	0	2	1	0	0	2	1	0	1	0	0	0	0	0	0	0	1	0	0	5	1	0	0	0	2	0	0	0	2	1	3	3	6	0	D_0__Bacteria;D_1__Acidobacteria;D_2__Subgroup 6
6ab03d6784d2732b310e74f7c343e951	0	0	0	0	0	0	2	1	1	0	0	3	2	2	0	0	0	0	0	2	0	1	0	0	0	0	0	0	0	0	0	0	0	1	0	0	D_0__Bacteria;D_1__Acidobacteria;D_2__Subgroup 6;D_3__uncultured bacterium 259;D_4__uncultured bacterium 259;D_5__uncultured bacterium 259;D_6__uncultured bacterium 259
9db7bda790283813102c33ecd6d0cf31	0	0	0	0	0	0	0	3	0	0	0	0	0	0	0	0	0	0	0	0	0	0	0	0	0	0	1	0	0	0	0	0	0	0	0	0	D_0__Bacteria;D_1__Proteobacteria;D_2__Alphaproteobacteria;D_3__Dongiales;D_4__Dongiaceae;D_5__Dongia
ede7215f662392306201dba83c749a04	0	0	0	1	0	0	0	0	0	0	0	0	6	0	2	0	0	0	0	0	4	1	4	0	0	0	0	4	2	0	3	6	0	2	4	3	D_0__Bacteria;D_1__Bacteroidetes;D_2__Ignavibacteria;D_3__Kryptoniales;D_4__BSV26
a60db59a21af765cff36cf3d8a01d198	2	0	0	1	0	0	0	0	2	1	1	0	0	0	0	0	0	0	0	3	0	2	0	0	0	1	3	0	3	3	6	1	0	0	3	0	D_0__Bacteria;D_1__Acidobacteria;D_2__Blastocatellia (Subgroup 4);D_3__Elev-16S-573;D_4__uncultured proteobacterium;D_5__uncultured proteobacterium;D_6__uncultured proteobacterium
622d5b4433548b4174388a2cbed81b5f	0	0	1	0	3	0	0	1	0	0	0	3	0	0	0	1	0	0	0	2	2	0	0	0	0	0	0	0	0	0	0	0	0	1	0	0	D_0__Bacteria;D_1__Bacteroidetes;D_2__Bacteroidia;D_3__Sphingobacteriales;D_4__env.OPS 17;D_5__uncultured Alistipes sp.;D_6__uncultured Alistipes sp.
534aa70e7c804e3196f1df42edea3081	3	0	0	3	0	0	0	0	0	0	0	0	0	0	0	2	0	0	0	0	0	0	0	0	2	0	0	0	0	0	0	0	0	0	0	0	D_0__Bacteria;D_1__Gemmatimonadetes;D_2__Gemmatimonadetes;D_3__Gemmatimonadales;D_4__Gemmatimonadaceae;D_5__Gemmatimonas
3da438e31d77a51addf5c3df10059210	0	0	0	0	0	0	0	2	0	0	0	0	0	0	0	0	0	0	0	0	7	0	0	0	0	0	0	2	0	0	0	1	0	1	0	2	D_0__Bacteria;D_1__Proteobacteria;D_2__Gammaproteobacteria;D_3__Betaproteobacteriales
488e559d1ae1682d1ce8fe15334827fd	0	0	0	0	0	0	0	0	0	0	0	0	0	1	0	1	0	0	0	1	0	0	0	2	0	0	0	0	0	0	0	0	0	0	0	0	D_0__Bacteria;D_1__Proteobacteria;D_2__Gammaproteobacteria;D_3__Betaproteobacteriales;D_4__Methylophilaceae;D_5__Methylophilus
0093b2b53d0d5d19339c6830214bf560	0	0	0	0	0	0	0	0	0	0	0	0	0	0	3	0	0	1	0	0	3	0	0	0	0	2	0	0	0	0	0	0	0	0	0	0	D_0__Bacteria;D_1__Proteobacteria;D_2__Alphaproteobacteria
716bbe79c92d13514410e2ffc262c332	0	0	0	0	0	0	0	0	0	0	4	0	0	1	0	0	0	3	2	0	16	4	2	1	0	6	0	0	0	0	0	0	1	0	0	0	D_0__Bacteria;D_1__Proteobacteria;D_2__Gammaproteobacteria;D_3__Xanthomonadales
385dd1db7b15bc051cd711258e538b36	0	0	0	0	0	0	1	0	0	2	1	0	0	0	1	0	0	1	0	0	0	0	0	0	0	0	0	2	0	1	0	0	2	1	0	1	D_0__Bacteria;D_1__Proteobacteria;D_2__Gammaproteobacteria;D_3__Betaproteobacteriales;D_4__SC-I-84
082a7d8d37c85b602e6dfc6428455eac	2	0	1	0	0	0	2	2	2	5	1	0	0	0	3	0	2	2	3	1	1	4	7	5	4	3	1	4	3	5	2	0	4	4	3	2	D_0__Bacteria;D_1__Proteobacteria;D_2__Alphaproteobacteria;D_3__Rhizobiales;D_4__Labraceae;D_5__Labrys
425b7eb2fbc7fda91fd819e9b10e4133	7	0	0	0	0	0	0	0	0	0	0	0	0	0	0	0	0	2	0	0	0	0	0	0	0	0	0	0	0	0	0	1	0	0	0	0	D_0__Bacteria;D_1__Proteobacteria;D_2__Alphaproteobacteria;D_3__Rhizobiales;D_4__Rhizobiaceae
e8d658510467855c080759dcefd9e297	0	6	0	3	8	0	2	0	2	4	0	3	2	0	0	0	0	2	0	1	0	0	3	1	1	0	2	0	1	0	0	3	0	9	1	1	D_0__Bacteria;D_1__Proteobacteria;D_2__Gammaproteobacteria;D_3__Betaproteobacteriales
0ba7f7ae666c4961ed08718563728e96	3	0	4	0	0	2	1	1	0	1	0	3	0	1	2	0	1	4	1	0	0	3	3	1	2	0	1	2	0	3	1	2	2	1	1	3	D_0__Bacteria;D_1__Proteobacteria;D_2__Gammaproteobacteria;D_3__Betaproteobacteriales;D_4__Burkholderiaceae
5ad7551338a1aceb4e76aabf63c52967	3	0	0	0	0	0	2	0	0	6	0	0	0	0	0	0	0	0	0	0	0	0	0	0	0	0	0	0	0	0	0	0	0	0	0	0	D_0__Bacteria;D_1__Proteobacteria;D_2__Gammaproteobacteria;D_3__Betaproteobacteriales;D_4__Chitinibacteraceae
ce959e132e3b2d542608ff48d6333d7b	0	0	0	0	0	0	1	0	0	1	0	0	3	0	2	0	0	0	1	0	0	0	0	0	1	1	0	0	0	0	0	0	0	0	0	0	D_0__Bacteria;D_1__Proteobacteria;D_2__Alphaproteobacteria;D_3__Sphingomonadales;D_4__Sphingomonadaceae;D_5__Sphingomonas
494d08c018ef00ff75c12ddbb89081b7	0	0	1	1	0	0	0	0	0	0	0	0	0	0	0	0	0	0	3	0	0	0	0	0	1	0	0	0	0	0	0	1	2	0	0	0	D_0__Bacteria;D_1__Acidobacteria;D_2__Acidobacteriia;D_3__Solibacterales;D_4__Solibacteraceae (Subgroup 3);D_5__Candidatus Solibacter
69af1de9d46c20c93d36ef25af3f3968	0	0	12	0	2	0	0	1	0	3	1	0	0	6	11	0	3	12	0	0	4	0	0	0	3	1	0	2	0	0	2	0	1	3	1	1	D_0__Bacteria;D_1__Chloroflexi;D_2__Dehalococcoidia;D_3__S085;D_4__uncultured soil bacterium;D_5__uncultured soil bacterium;D_6__uncultured soil bacterium
6dc97466163b7bb5d3b7e29c39ff5229	0	0	0	0	0	0	0	0	2	0	0	0	1	2	0	0	0	3	0	0	0	0	0	0	0	0	0	2	0	0	0	0	0	0	0	0	D_0__Bacteria;D_1__Acidobacteria;D_2__Acidobacteriia;D_3__Solibacterales;D_4__Solibacteraceae (Subgroup 3);D_5__Bryobacter;D_6__uncultured actinobacterium
134b3471168ad999241e915d1e68ed27	0	0	0	0	0	0	0	0	0	0	0	0	0	0	0	0	0	0	0	0	0	2	0	3	0	0	0	0	0	0	0	0	0	0	0	0	D_0__Bacteria;D_1__Gemmatimonadetes;D_2__Gemmatimonadetes;D_3__Gemmatimonadales;D_4__Gemmatimonadaceae;D_5__uncultured;D_6__uncultured bacterium #0319-7E19
585b6f2e627a273ee43e2a6b96a1c567	0	0	0	0	0	0	0	0	0	0	0	0	0	0	6	0	0	0	0	0	0	0	0	0	0	0	0	0	0	0	0	0	0	0	0	0	D_0__Bacteria;D_1__Bacteroidetes;D_2__Bacteroidia;D_3__Chitinophagales;D_4__Chitinophagaceae;D_5__Taibaiella
66bdeb87816194614bc618c49aa95386	0	0	1	2	3	2	1	0	0	0	2	0	0	0	0	6	0	0	0	0	0	0	0	0	0	0	0	0	0	0	2	0	1	0	0	0	D_0__Bacteria;D_1__Acidobacteria;D_2__Acidobacteriia;D_3__Acidobacteriales
67519a7395aadb0dd4dd3acbf0a3d6b8	0	3	0	1	2	2	0	0	0	0	0	0	0	0	0	0	0	0	0	0	0	0	0	0	0	0	0	0	0	0	0	0	0	0	0	0	D_0__Bacteria;D_1__Proteobacteria;D_2__Alphaproteobacteria
7b2248994bb111a74662ec8ad3cad02b	1	3	3	2	4	2	1	1	2	0	0	3	0	0	0	0	0	2	0	0	0	2	1	0	0	0	1	0	1	2	2	1	4	3	4	4	D_0__Bacteria;D_1__Actinobacteria;D_2__Actinobacteria;D_3__Frankiales;D_4__Acidothermaceae;D_5__Acidothermus;D_6__uncultured bacterium DA016
fe6630240d731544375b68a0fd01bed2	4	1	0	3	4	0	0	0	0	0	0	0	0	0	0	0	0	0	0	0	0	0	0	0	0	0	0	0	0	0	0	0	0	0	0	0	D_0__Bacteria;D_1__Acidobacteria;D_2__Acidobacteriia;D_3__Solibacterales;D_4__Solibacteraceae (Subgroup 3);D_5__Bryobacter;D_6__uncultured actinobacterium
920f47366220dfc027bf5ecc7dcad85f	0	0	0	0	0	0	1	0	0	0	0	0	1	0	1	4	0	0	0	3	0	3	0	0	2	0	0	0	0	0	0	0	0	0	0	0	D_0__Bacteria;D_1__Patescibacteria;D_2__Saccharimonadia;D_3__Saccharimonadales
59eedda752be385200592f633ee9e900	0	0	0	0	0	0	0	0	0	0	0	2	3	0	0	0	0	0	0	0	0	0	0	0	2	0	0	0	3	0	0	0	0	0	0	0	D_0__Bacteria;D_1__Proteobacteria;D_2__Alphaproteobacteria;D_3__Sphingomonadales;D_4__Sphingomonadaceae;D_5__Novosphingobium
87ca80db8ec1039d702c46889dc4843f	0	0	1	1	2	3	0	0	0	0	0	2	0	0	0	0	0	1	0	0	0	0	0	0	1	2	0	0	0	0	0	0	0	0	1	0	D_0__Bacteria;D_1__Bacteroidetes;D_2__Bacteroidia;D_3__Cytophagales
a53d1b6d1d921381b4714a871435d801	0	0	0	0	0	0	1	0	0	0	0	0	0	0	0	0	0	0	0	0	0	0	0	0	0	0	0	0	0	0	0	3	0	0	2	2	D_0__Bacteria;D_1__Verrucomicrobia;D_2__Verrucomicrobiae;D_3__Pedosphaerales;D_4__Pedosphaeraceae;D_5__uncultured Prosthecobacter sp.;D_6__uncultured Prosthecobacter sp.
657ce78cfce5235165960ab7ce68d0ec	0	0	0	0	0	0	0	0	0	0	0	0	0	2	0	0	0	0	0	0	0	1	0	0	0	2	0	0	4	0	0	0	0	0	0	0	D_0__Bacteria;D_1__Proteobacteria;D_2__Gammaproteobacteria;D_3__Betaproteobacteriales;D_4__SC-I-84;D_5__uncultured Burkholderiaceae bacterium;D_6__uncultured Burkholderiaceae bacterium
a0460e739c646f36727fdcd6aee4a9d7	6	0	10	8	2	4	7	0	0	1	2	0	0	2	2	0	4	2	0	0	1	1	0	0	2	3	0	2	0	0	0	0	5	0	2	3	D_0__Bacteria;D_1__Proteobacteria;D_2__Gammaproteobacteria;D_3__Xanthomonadales;D_4__Xanthomonadaceae;D_5__Arenimonas;D_6__Arenimonas daechungensis
fb9ed4adf72e36c921ea3c614aa9d2ad	0	0	1	0	0	0	0	0	0	0	0	0	0	0	0	0	0	3	0	0	3	2	2	2	0	0	1	0	0	0	0	0	0	0	0	0	D_0__Bacteria;D_1__Proteobacteria;D_2__Gammaproteobacteria;D_3__Betaproteobacteriales;D_4__Burkholderiaceae
c48e50d6df9c90980944c32f76c5be4b	0	1	0	0	0	0	0	0	0	0	1	0	0	0	0	0	0	0	0	1	0	0	0	0	0	0	0	0	0	0	0	1	0	0	1	0	D_0__Bacteria;D_1__Gemmatimonadetes;D_2__Gemmatimonadetes;D_3__Gemmatimonadales;D_4__Gemmatimonadaceae;D_5__uncultured;D_6__Gemmatimonadetes bacterium LX87
e95137f429214176e05a2bba0ac6f53e	0	0	0	0	0	0	0	2	0	0	0	1	0	0	0	0	0	0	0	0	0	0	0	0	0	0	0	0	0	0	2	0	0	0	1	0	D_0__Bacteria;D_1__Proteobacteria;D_2__Deltaproteobacteria;D_3__Myxococcales;D_4__BIrii41
0d6ff0854dad21ffe12ebe563bcc5438	0	0	0	0	0	0	0	0	0	0	0	0	0	0	0	0	0	0	0	0	0	0	0	0	4	0	0	0	0	0	0	0	0	2	0	0	D_0__Bacteria;D_1__Proteobacteria;D_2__Deltaproteobacteria;D_3__Myxococcales;D_4__Haliangiaceae;D_5__Haliangium
5beb46b3286ffe4d71c2572c50d47fb8	1	0	2	0	0	1	0	0	2	0	0	0	0	0	1	0	0	1	0	0	0	0	2	0	0	0	0	0	0	0	0	0	0	0	0	0	D_0__Bacteria;D_1__Actinobacteria;D_2__Acidimicrobiia;D_3__IMCC26256;D_4__uncultured organism;D_5__uncultured organism;D_6__uncultured organism
c3385d62d037af4f915ed71326727159	3	1	1	2	2	2	1	0	4	0	0	0	1	3	2	3	0	2	0	3	4	6	0	1	3	0	3	0	0	0	0	1	2	2	0	0	D_0__Bacteria;D_1__Proteobacteria;D_2__Gammaproteobacteria;D_3__Betaproteobacteriales;D_4__Nitrosomonadaceae;D_5__MND1;D_6__uncultured Methylococcales bacterium
3e504df48e790148ab1a85c024617def	0	0	0	0	0	2	0	1	2	5	6	10	1	3	2	4	2	8	3	4	11	2	6	0	6	6	7	0	0	8	5	0	0	5	6	4	D_0__Bacteria;D_1__Actinobacteria;D_2__Actinobacteria;D_3__Propionibacteriales;D_4__Nocardioidaceae
cb1208b03378ce6b9461291396f15dbf	0	0	0	0	0	0	0	0	0	0	0	0	0	0	0	0	0	0	0	0	0	0	0	0	0	0	0	0	0	0	0	0	0	6	0	0	D_0__Bacteria;D_1__Bacteroidetes;D_2__Bacteroidia;D_3__Flavobacteriales;D_4__Flavobacteriaceae;D_5__Flavobacterium
81980b33cf93d79c9d311e54f4833078	2	3	2	1	0	0	4	5	0	3	9	5	0	8	1	0	0	2	10	3	0	1	0	0	0	5	1	15	6	17	0	6	2	5	2	7	D_0__Bacteria;D_1__Patescibacteria;D_2__Saccharimonadia;D_3__Saccharimonadales
abe38148312349caa0e04acab6c5a674	0	0	0	0	0	0	0	0	0	0	0	0	2	0	0	0	0	0	0	2	0	2	1	0	0	0	0	0	0	0	0	0	0	0	0	1	D_0__Bacteria;D_1__Proteobacteria;D_2__Gammaproteobacteria;D_3__Betaproteobacteriales;D_4__SC-I-84
2f90a248180e651e9c0b55b22eab37f6	0	0	0	0	0	0	0	1	4	2	2	0	0	0	0	0	0	0	0	0	0	0	0	0	0	2	0	0	0	0	0	0	0	0	0	0	D_0__Bacteria;D_1__Patescibacteria;D_2__Saccharimonadia;D_3__Saccharimonadales;D_4__uncultured Epsilonproteobacteria bacterium;D_5__uncultured Epsilonproteobacteria bacterium;D_6__uncultured Epsilonproteobacteria bacterium
24f8e1763b6d115be5179e4052647ffa	0	0	1	0	3	3	2	2	2	2	1	6	0	0	0	0	0	0	0	0	0	0	0	0	0	0	0	0	0	0	2	0	2	1	1	3	D_0__Bacteria;D_1__Proteobacteria;D_2__Gammaproteobacteria;D_3__Betaproteobacteriales
a223b9be854012a068f1e385ef216a59	0	0	0	0	2	0	0	0	0	0	0	0	0	0	0	0	0	0	0	0	0	0	0	0	1	2	3	0	0	0	0	0	0	0	0	0	D_0__Bacteria;D_1__Actinobacteria;D_2__Actinobacteria;D_3__Micromonosporales;D_4__Micromonosporaceae
ce0f22ba4f9a32939a5ff16e0ee9203f	0	0	0	0	0	0	2	0	0	0	3	0	2	0	0	0	2	2	1	0	6	4	4	4	1	1	0	0	0	0	0	3	4	1	2	1	D_0__Bacteria;D_1__Proteobacteria;D_2__Gammaproteobacteria;D_3__Betaproteobacteriales;D_4__SC-I-84;D_5__beta proteobacterium JGI 0001003-N18;D_6__beta proteobacterium JGI 0001003-N18
a671e539b9cd727f5c38e165f915d982	0	1	0	0	0	0	1	0	0	2	0	0	0	0	0	0	0	0	0	0	0	0	0	0	0	1	0	0	0	0	0	1	2	0	0	1	D_0__Bacteria;D_1__Actinobacteria;D_2__Thermoleophilia;D_3__Solirubrobacterales;D_4__67-14;D_5__uncultured Conexibacteraceae bacterium;D_6__uncultured Conexibacteraceae bacterium
4a7d6af5564330a3942bf7fb3116b21f	0	0	2	0	0	3	0	4	2	0	1	0	0	0	0	0	0	0	0	0	0	1	0	0	0	0	0	0	0	0	0	0	0	0	0	0	D_0__Bacteria;D_1__Proteobacteria;D_2__Gammaproteobacteria;D_3__Betaproteobacteriales;D_4__SC-I-84
5ea13f3600599fe258d6da334974b947	0	0	1	0	0	3	0	0	0	0	0	0	0	1	0	0	0	0	0	0	0	0	0	0	0	0	0	0	0	0	0	0	0	0	0	0	D_0__Bacteria;D_1__Proteobacteria;D_2__Deltaproteobacteria;D_3__Myxococcales
2c56f2a45890c51dda0014e4701b41ee	0	2	0	0	0	0	0	0	0	0	3	0	0	0	0	0	0	0	0	0	0	0	0	0	0	0	0	0	0	0	0	1	0	0	0	0	D_0__Bacteria;D_1__Proteobacteria;D_2__Alphaproteobacteria;D_3__Rhizobiales
b9b654146b0d9f7145490759db2f5734	2	5	2	2	1	0	0	1	1	1	0	2	5	0	0	0	0	0	1	0	1	1	0	0	2	0	0	0	0	0	0	3	1	0	2	4	D_0__Bacteria;D_1__Acidobacteria;D_2__Acidobacteriia;D_3__Acidobacteriales;D_4__uncultured;D_5__uncultured delta proteobacterium;D_6__uncultured delta proteobacterium
3f97e3748617ecf631a222f15060e78b	0	0	0	1	0	0	0	0	0	0	0	0	0	0	0	1	0	0	1	1	0	0	0	0	0	2	4	0	0	0	0	0	0	0	0	0	D_0__Bacteria;D_1__Verrucomicrobia;D_2__Verrucomicrobiae;D_3__Chthoniobacterales;D_4__Chthoniobacteraceae;D_5__Candidatus Udaeobacter
2581b59ad488628d7dba245732013cef	24	7	28	19	31	22	52	10	10	2	19	38	2	13	25	5	16	13	2	5	22	7	4	11	15	13	8	5	51	12	11	7	8	14	18	6	D_0__Bacteria;D_1__Bacteroidetes;D_2__Bacteroidia;D_3__Chitinophagales;D_4__Chitinophagaceae
1dbce0ecdd92a66434ac21579d378ed4	0	0	0	0	0	1	0	0	0	0	1	0	0	0	0	0	3	0	1	0	0	1	0	1	0	0	1	0	1	0	1	0	0	0	0	0	D_0__Bacteria;D_1__Proteobacteria;D_2__Deltaproteobacteria;D_3__Myxococcales;D_4__Haliangiaceae;D_5__Haliangium;D_6__myxobacterium AT3-03
2904064ede46892e1367d2c95f541b36	0	0	0	0	0	0	0	0	0	1	1	1	0	0	0	0	0	0	0	0	0	0	0	0	0	0	0	0	1	0	0	0	0	0	0	1	D_0__Bacteria;D_1__Proteobacteria;D_2__Gammaproteobacteria;D_3__Betaproteobacteriales;D_4__SC-I-84
6c5114cf51ea6e8a3e1075f51cde8db5	0	0	0	3	0	0	0	0	0	0	0	1	0	0	0	2	0	0	0	0	0	0	0	0	0	0	0	0	0	0	0	0	1	0	0	0	D_0__Bacteria
6c22742119eb4613689926f8313eb531	0	0	0	0	0	2	0	0	0	1	0	0	0	0	0	0	0	0	0	1	0	0	0	0	0	0	0	0	0	1	0	0	0	0	0	0	D_0__Bacteria;D_1__Actinobacteria;D_2__Thermoleophilia
0989e624ab9c9f88c4d59f03a22da287	0	0	0	0	0	0	0	0	0	0	0	0	0	0	1	0	0	0	1	0	0	2	1	1	0	0	4	2	2	0	0	0	0	0	0	0	D_0__Bacteria;D_1__Acidobacteria;D_2__Subgroup 6;D_3__uncultured bacterium DA023;D_4__uncultured bacterium DA023;D_5__uncultured bacterium DA023;D_6__uncultured bacterium DA023
60b95d204425d5732363b83df04ab275	0	0	1	0	0	0	0	0	0	0	0	0	0	0	0	0	0	0	0	0	0	0	0	0	0	0	0	0	0	0	0	1	0	0	2	0	D_0__Bacteria;D_1__Latescibacteria
f970acf12ea82ed90eabcc9ac35ee028	0	0	0	0	0	0	0	0	1	0	0	24	0	0	0	0	3	0	0	0	2	0	0	0	0	0	0	0	0	0	1	1	0	0	0	0	D_0__Bacteria;D_1__Proteobacteria;D_2__Gammaproteobacteria;D_3__Cellvibrionales;D_4__Cellvibrionaceae;D_5__Cellvibrio
d524165e8ebfe105366852a22450c9e9	0	0	0	0	0	0	0	0	0	0	0	0	0	0	0	0	0	0	0	2	0	0	1	0	0	1	0	2	0	0	0	0	0	0	0	0	D_0__Bacteria;D_1__Proteobacteria;D_2__Deltaproteobacteria;D_3__Myxococcales;D_4__Polyangiaceae;D_5__Pajaroellobacter
ebc9ebd1b2b4522d5c0b02052cee7cc2	0	0	0	0	0	0	0	0	0	0	0	0	0	0	0	0	2	0	1	0	0	0	0	1	2	0	0	1	0	0	0	0	0	0	0	0	D_0__Bacteria;D_1__Proteobacteria;D_2__Gammaproteobacteria;D_3__Betaproteobacteriales;D_4__SC-I-84
b5a9c439fd471ccae535bfd943b26dad	0	0	0	0	0	0	0	2	0	12	0	0	0	0	0	0	0	0	0	0	0	0	0	0	0	4	0	0	1	0	0	0	1	0	0	0	D_0__Bacteria;D_1__Proteobacteria;D_2__Alphaproteobacteria;D_3__Sphingomonadales;D_4__Sphingomonadaceae;D_5__Sphingomonas
4f9ae03907a3b792becc68dce05317cf	0	0	0	0	0	1	0	0	0	0	0	0	0	2	0	0	0	0	0	0	0	0	0	0	3	1	1	0	0	0	0	0	3	1	0	0	D_0__Bacteria;D_1__Proteobacteria;D_2__Gammaproteobacteria;D_3__Betaproteobacteriales;D_4__SC-I-84
6661579b5889c61addefd54cb67b5ac4	0	0	0	0	0	2	7	0	1	0	0	0	0	0	0	0	0	0	0	0	0	0	0	0	0	0	0	0	0	0	0	1	0	0	0	0	D_0__Bacteria;D_1__Bacteroidetes;D_2__Bacteroidia;D_3__Chitinophagales;D_4__Saprospiraceae;D_5__Phaeodactylibacter;D_6__uncultured Haliscomenobacter sp.
8e6a6c5e2b958fd57c3974c54ff567ed	0	0	2	0	0	0	1	0	0	2	0	0	0	0	0	0	0	0	0	0	0	0	0	0	0	0	0	0	0	0	0	3	2	1	0	2	D_0__Bacteria;D_1__Proteobacteria;D_2__Alphaproteobacteria
4979249816ce6e42480bd9a76da2d1fe	0	0	2	3	0	0	0	2	0	0	0	0	0	0	0	0	0	2	0	0	0	0	0	0	0	0	0	0	0	0	0	0	0	1	0	0	D_0__Bacteria;D_1__Proteobacteria;D_2__Deltaproteobacteria;D_3__Myxococcales
8555d6ea9978e4f8dd24867f864ab3ca	0	0	0	0	0	0	0	0	0	0	0	0	0	0	0	0	0	0	0	0	0	0	0	0	0	0	4	0	2	0	0	0	0	1	3	0	D_0__Bacteria;D_1__Actinobacteria;D_2__MB-A2-108;D_3__uncultured bacterium #0425-2M17;D_4__uncultured bacterium #0425-2M17;D_5__uncultured bacterium #0425-2M17;D_6__uncultured bacterium #0425-2M17
9636a1fd74ebed07a48d742660c47dfb	2	0	1	0	0	0	0	0	0	0	0	0	0	0	0	0	0	0	0	0	0	0	0	0	0	0	0	0	0	0	0	0	0	0	2	0	D_0__Bacteria;D_1__Proteobacteria;D_2__Deltaproteobacteria;D_3__Myxococcales;D_4__Haliangiaceae;D_5__Haliangium;D_6__uncultured sludge bacterium A9
d2920ce52f7f8f8027ac5fe9a3451f21	0	0	0	2	0	4	0	0	0	0	0	1	1	0	0	4	2	0	0	2	0	0	0	0	1	0	0	0	0	0	2	0	1	0	0	0	D_0__Bacteria;D_1__Gemmatimonadetes;D_2__Gemmatimonadetes;D_3__Gemmatimonadales;D_4__Gemmatimonadaceae;D_5__uncultured;D_6__Gemmatimonadetes bacterium LP81
177596c566c0928c6a5d54030034b18b	0	0	3	0	0	4	0	0	0	0	0	0	0	0	0	0	0	3	0	0	10	2	0	0	0	0	0	0	0	0	0	0	0	0	0	0	D_0__Bacteria;D_1__Acidobacteria;D_2__Subgroup 22;D_3__uncultured Holophaga sp.;D_4__uncultured Holophaga sp.;D_5__uncultured Holophaga sp.;D_6__uncultured Holophaga sp.
251c8539ca65789cff02a5d2269e3363	0	0	0	0	0	0	0	0	0	0	0	2	0	0	0	0	0	2	0	0	0	0	0	0	0	0	0	0	0	0	0	0	0	1	0	0	D_0__Bacteria;D_1__Gemmatimonadetes;D_2__Gemmatimonadetes;D_3__Gemmatimonadales;D_4__Gemmatimonadaceae;D_5__uncultured;D_6__Gemmatimonadetes bacterium LX87
77fe4ca356b8b54336d6acdc06a09603	0	0	0	0	0	0	0	0	0	0	0	1	0	0	0	0	0	0	0	0	0	0	0	0	0	0	1	0	0	0	0	0	0	0	0	0	D_0__Bacteria;D_1__Bacteroidetes;D_2__Bacteroidia;D_3__Chitinophagales;D_4__Chitinophagaceae
4079f15104cd50db23e0369c84aaaa3b	0	0	0	0	0	0	0	0	0	0	0	0	0	0	0	0	0	0	0	0	4	0	0	0	0	1	0	0	0	0	0	0	0	0	0	0	D_0__Bacteria;D_1__Bacteroidetes;D_2__Bacteroidia;D_3__Chitinophagales;D_4__Saprospiraceae;D_5__uncultured;D_6__uncultured Haliscomenobacter sp.
5188fb7185fe5518f3b694befb773624	0	0	0	0	0	0	0	1	0	0	0	0	0	1	5	1	2	0	0	0	3	0	0	0	12	0	0	0	1	3	0	0	1	0	0	0	D_0__Bacteria;D_1__Bacteroidetes;D_2__Bacteroidia;D_3__Flavobacteriales;D_4__Flavobacteriaceae;D_5__Flavobacterium
2b6693f54e7b926834fb545a1dbc0984	0	0	0	0	0	0	0	0	0	0	0	0	0	1	1	0	0	0	0	0	1	0	0	2	2	0	0	2	0	2	0	0	0	0	0	0	D_0__Bacteria;D_1__Bacteroidetes;D_2__Bacteroidia;D_3__Cytophagales;D_4__Microscillaceae
9c9acb20d27fb299f639a0cccc6bb8e6	0	0	0	0	0	1	0	1	5	0	0	0	3	0	4	2	4	0	0	13	0	6	0	0	0	0	0	0	1	0	0	0	0	0	0	0	D_0__Bacteria;D_1__Proteobacteria;D_2__Alphaproteobacteria
613d9bea0a44313a218655d5c5dc9a18	0	0	0	0	0	0	0	0	0	0	0	0	0	0	0	0	0	2	0	0	0	0	0	0	0	0	0	0	1	1	0	0	0	0	0	0	D_0__Bacteria;D_1__Proteobacteria;D_2__Alphaproteobacteria;D_3__Rhizobiales;D_4__Rhizobiales Incertae Sedis;D_5__Nordella;D_6__uncultured soil bacterium
1491214cf9ef9e245c5b68536b465b07	0	2	2	0	1	5	0	7	3	0	6	0	0	3	0	0	0	1	0	0	0	1	0	0	1	2	2	1	0	1	0	0	1	8	0	5	D_0__Bacteria;D_1__Latescibacteria;D_2__Latescibacteria;D_3__Latescibacterales;D_4__Latescibacteraceae;D_5__metagenome;D_6__metagenome
19feb3cc444ba4bb32d7a74b9eb0913a	0	0	0	0	0	0	0	0	0	0	0	0	0	0	0	0	0	1	1	0	0	0	0	0	0	1	0	3	0	0	1	0	0	0	2	0	D_0__Bacteria;D_1__Chloroflexi;D_2__KD4-96;D_3__uncultured Longilinea sp.;D_4__uncultured Longilinea sp.;D_5__uncultured Longilinea sp.;D_6__uncultured Longilinea sp.
672b891494433dec391c0649340d6b42	0	2	3	2	1	3	4	0	4	2	0	1	11	6	9	7	8	8	9	10	9	5	9	7	17	6	3	4	10	7	0	1	1	1	1	1	D_0__Bacteria;D_1__Proteobacteria;D_2__Gammaproteobacteria;D_3__Betaproteobacteriales;D_4__SC-I-84
d38360704ede2d7aafd97dc578baa0d5	9	0	10	2	5	9	2	1	2	5	1	6	0	3	2	0	0	2	0	2	3	2	3	5	4	5	8	4	6	7	5	5	4	4	4	2	D_0__Bacteria;D_1__Proteobacteria;D_2__Alphaproteobacteria;D_3__uncultured;D_4__uncultured proteobacterium;D_5__uncultured proteobacterium;D_6__uncultured proteobacterium
237d9dc06bbb8dd7c41fec11d1e2d58c	0	0	0	0	0	0	0	0	0	0	0	0	0	0	0	1	0	0	0	0	0	0	0	0	0	0	0	0	0	1	0	0	0	0	0	0	D_0__Bacteria;D_1__Proteobacteria;D_2__Alphaproteobacteria;D_3__Rhizobiales;D_4__Xanthobacteraceae
5755de4ce9fcbe4506ca8c3e6d5f2a61	0	0	1	0	0	0	0	0	0	0	0	1	1	1	0	0	0	0	0	0	0	1	0	0	0	0	0	0	0	0	0	0	0	0	0	1	D_0__Bacteria;D_1__Acidobacteria;D_2__Subgroup 6
2b0b00bae4d9dd23d07082ee59def219	0	0	0	0	0	0	0	0	0	0	0	0	0	0	0	0	0	0	0	0	1	0	2	0	0	0	0	0	2	0	1	0	0	1	2	0	D_0__Bacteria;D_1__Actinobacteria;D_2__Actinobacteria;D_3__Micrococcales;D_4__Micrococcaceae;D_5__Paenarthrobacter
5bcb5acc1e37bf8b0aec230a591b6516	0	0	0	0	0	0	0	0	0	0	0	0	2	0	0	0	0	0	1	0	0	0	2	0	0	0	0	2	0	3	0	0	0	0	0	0	D_0__Bacteria;D_1__Gemmatimonadetes;D_2__Gemmatimonadetes;D_3__Gemmatimonadales;D_4__Gemmatimonadaceae;D_5__uncultured;D_6__uncultured prokaryote
4dc4b148068f4de06fbd5a2a4955a169	0	1	0	0	0	0	0	1	1	0	0	0	0	0	0	0	0	0	0	0	0	0	0	0	0	0	0	0	0	0	1	0	0	0	0	0	D_0__Bacteria;D_1__Proteobacteria;D_2__Gammaproteobacteria;D_3__Betaproteobacteriales;D_4__Nitrosomonadaceae;D_5__Ellin6067
452cea867ca784929896c2c9c82f84d2	0	1	0	1	0	1	1	0	0	0	0	2	0	0	0	0	0	0	0	0	0	0	0	0	0	0	0	0	0	0	0	0	1	0	3	1	D_0__Bacteria;D_1__Proteobacteria;D_2__Alphaproteobacteria;D_3__Caulobacterales;D_4__Caulobacteraceae;D_5__Phenylobacterium
[truncated: 5,688 more rows]
